# Supplementary material for: Water-Friendly Landscape Design: A Prescription for Healthy Watersheds
Source: Royal Society of Chemistry journal article supplement (doi:10.1039/c5sc03447g), 2006-05-31
Supplement: c5sc03447g1.pdf [file c5sc03447g1.pdf]

# Quantum-mechanical simulation of protein crystals and water-protein interactions: the case of crambin

Massimo Delle Piane, Marta Corno, Roberto Orlando, Roberto Dovesi, Piero Ugliengo<sup>†</sup>

Department of Chemistry and NIS Centre, University of Torino, via Pietro Giuria 7, 10125, Torino, Italy

## SUPPORTING INFORMATION

### COMPUTATIONAL DETAILS

The development version of the CRYSTAL14 code<sup>1</sup> was adopted for all the *ab initio* calculations in its massively parallel implementation.<sup>2</sup> CRYSTAL14 permits the study of systems of all dimensionalities, from molecules to crystals. It employs a Gaussian type basis, paired with both Density Functional Theory (DFT) and Hartree Fock (HF) Hamiltonians.

#### Hamiltonian

All calculations were performed within the Density Functional Theory, adopting the Becke, 3 parameters, Lee-Yang-Parr (B3LYP) hybrid functional.<sup>3</sup> Due to the use of a local basis set and suitable truncation of the exchange series, the present implementation of hybrid functionals in CRYSTAL14 is very efficient compared to other codes based on plane waves, being only about three times slower than pure GGAs.<sup>2</sup> The electron density and its gradient were integrated over a pruned grid consisting of 974 angular and 75 radial points per atom generated through the Gauss–Legendre quadrature and Lebedev schemes. The accuracy of this grid can be estimated from the integrated

number of electrons, that is 6760.0006  $e$  for the largest studied system (6760 in the unit cell). Values of the tolerances that control the Coulomb and exchange series in periodical systems were kept at the default values ( $10^{-6}$  and  $10^{-12}$  Ha).<sup>4</sup> For the periodic cases, the Hamiltonian matrix was diagonalized only at the  $\Gamma$  point, due to the large volume of the unit cells.<sup>5</sup> The eigenvalue level-shifting technique was used to initially lock the system in a non-conducting state, with the level shifter set to 0.6 Ha, which is then relaxed at the end of the self consistent field iterations.<sup>6</sup> To further help convergence of the Self Consistent Field (SCF), the Fock/KS matrix at a given cycle was mixed with 30% of the one of the previous cycle. The dispersion contribution was added to the DFT energies and gradients, by means of the empirical dispersion correction originally proposed by Grimme and known as D2 correction,<sup>7</sup> with the modified parameters proposed by Civalleri *et al.* for the treatment of molecular crystals using the B3LYP hybrid functional (hereafter referred as B3LYP-D\*<sup>8</sup>).

### **Basis Set**

A split valence double- $\zeta$  basis set (6-31G(d,p)) plus polarization functions was applied to C, N, S and O,<sup>9</sup> while an Ahlrichs's pVDZ basis was used for H.<sup>10</sup> For the sake of simplicity, the chosen combination of Hamiltonian and basis will be identified as B3LYP-D\*/6-31G(d,p) in the following. As anticipated in the introduction, we modeled three crambin crystals differing for the amount of solvating water, namely with 0W, 84W and 172W water molecules investigated in the present work (*vide infra*) resulting in 12354, 14370 and 16482 Atomic Orbitals (AOs) in the unit cell, respectively. Both cell parameters and internal coordinates were optimized using the analytical gradient method.

### **Geometry optimizations**

The Hessian is upgraded with the Broyden-Fletcher-Goldfarb-Shanno (BFGS) algorithm.<sup>11</sup> The initial Hessian for most calculations was generated by means of a classical model as proposed by Schlegel.<sup>12</sup> Due to memory constraints, for the largest studied system (172W, 1800 atoms/cell), the initial Hessian guess was changed to the identity matrix. Default convergence values were used for the maximum allowed gradient, the maximum atomic displacement and their maximum allowed root

mean square values for convergence (0.00045 Ha·bohr<sup>-1</sup>, 0.00180 Bohr, 0.00030 Ha·bohr<sup>-1</sup> and 0.00120 Bohr, respectively).

### Computation of crystal formation energies

The energetics of the protein crystal and of the protein-protein and protein-water interactions was decomposed in various contributions as in Ref. <sup>13</sup> and detailed below.

For a general crystal  $CRY$  with  $n$  proteins  $P$  and  $m$  water molecules  $W$  in the unit cell, the formation energy  $\Delta E$  can be defined as:

$$\Delta E = E(CRY/CRY) - n \cdot E(P/P) - m \cdot E(W/W) \quad (1)$$

where  $E(CRY/CRY)$ ,  $E(P/P)$  and  $E(W/W)$  are the energies of the optimized crystal, free protein and free water, respectively (the symbol after the / refers to the geometry at which the energy was evaluated).  $\Delta E$  is determined by the balance between the energy gain due to the new interactions present in the crystal with respect to the isolated compounds and the energy loss due to the structural deformations occurring for  $P$  and  $W$  from the gas to the condensed phase. For a crystal to be thermochemically stable  $\Delta E < 0$ . A deformation-free formation energy  $\Delta E^*$  is defined as:

$$\Delta E^* = E(CRY/CRY) - \sum_{i=1}^n E(P_i/CRY) - \sum_{i=1}^m E(W_i/CRY) \quad (2)$$

where  $E(P_i/CRY)$  is the energy of the  $i$ -th isolated protein taken at the geometry of the optimized crystal, and  $E(W_i/CRY)$  is the energy of the  $i$ -th water molecule taken in the geometry of the optimized crystal. Eq. 2 can be easily reformulated to include the Basis Set Superposition Error (BSSE) correction, using the same counterpoise method adopted for intermolecular complexes:<sup>14</sup>

$$\Delta E^{*C} = E(CRY/CRY) - \sum_{i=1}^n E(P_i + gh/CRY) - \sum_{i=1}^m E(W_i + gh/CRY) \quad (3)$$

where “+ *gh*” means that the energy is computed with the addition of the ghost functions of the surrounding molecules. In periodic systems, this is usually accomplished by including ghost functions within a chosen cutoff distance (here, 40 Å) around the molecule. The *BSSE* can then be defined as:

$$BSSE = \Delta E^* - \Delta E^{*C} \quad (4)$$

and the final, BSSE corrected, formation energy  $\Delta E^C$  is defined as:

$$\Delta E^C = \Delta E - BSSE \quad (5)$$

Eqs. 1-5 were then adapted to the different systems considered in the present work. For protein-protein and protein-water interactions of Table 4, the energetics was studied deformation-free, that is with the structure of the components frozen at the geometry of the interacting system. For some processes of Table 3, a water box representing liquid water was taken as a reference. To study such processes, Eqs. 1-3 must be reformulated as follows:

$$\Delta E = E(CRY/CRY) - n \cdot E(P/P) - E(W_m/W_m) \quad (6)$$

$$\Delta E^* = E(CRY/CRY) - \sum_{i=1}^n E(P_i/CRY) - E(W_m/CRY) \quad (7)$$

$$\Delta E^{*C} = E(CRY/CRY) - \sum_{i=1}^n E(P_i + gh/CRY) - E(W_m + gh/CRY) \quad (8)$$

where  $E(W_m/W_m)$  is the energy of an optimized liquid water box containing  $m$  molecules, while  $E(W_m + gh/CRY)$  and  $E(W_m/CRY)$  are the energies of the 3D framework of  $m$  water molecules as found in the crystal with and without the protein ghost functions, respectively. Eqs. 4-5 remain valid. To evaluate  $E(W_m/W_m)$ , a water box of 84 molecules (side: 13.4 Å) was generated through the PACKMOL utility,<sup>15</sup> thermalized through a 10 ps by PBE-D2/TZVP *ab initio* molecular dynamics simulation at 300 K with the CP2K<sup>16</sup> software and then B3LYP-D\*/6-31G(d,p) fully optimized with CRYSTAL14. For the 172W case  $E(W_{84}/W_{84})$  was scaled by a factor 172/84.

### Computation of BSSE-corrected charge transfers

Consider the interaction between two components,  $A$  and  $B$ , so that:

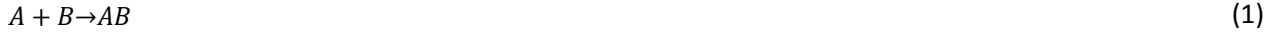

These two systems have, when isolated, total electronic charges  $Q_A$  and  $Q_B$ , corresponding to their total number of electrons. These electrons are distributed among the different atoms composing the systems:

$$Q_A = \sum_{i=1}^{N_A} Q_i \quad (2)$$

where  $N_A$  is the total number of atoms in  $A$  and  $Q_i$  is the electronic charge on the  $i^{th}$  atom, that may be estimated through a Mulliken population analysis.

The interaction complex  $AB$  has a total electronic charge  $Q_{AB}$ :

$$Q_{AB} = Q_{A^*} + Q_{B^*} \quad (3)$$

where  $Q_{A^*}$  and  $Q_{B^*}$  are the electronic charges on  $A$  and  $B$  when involved in the interaction. Of course, due to the charge transfer associated to this interaction,  $Q_{A^*} \neq Q_A$  and  $Q_{B^*} \neq Q_B$ .

This charge transfer ( $QT$ ) can then be defined as:

$$QT_{B \rightarrow A} = Q_{A^*} - Q_A \quad (4)$$

If  $QT_{B \rightarrow A} > 0$ , a net flux of electronic charge from  $B$  to  $A$  has occurred, while  $B$  has obtained charge if  $QT_{B \rightarrow A} < 0$ . Of course, since the total electronic charge must be conserved:

$$QT_{B \rightarrow A} = -QT_{A \rightarrow B} \quad (5)$$

The Basis Set Superposition Error (BSSE) is known to affect any calculation based on atom-centered basis functions. This error is due to the superposition, in the  $AB$  complex, of the functions centered on both  $A$  and  $B$  atoms, so that  $AB$  is described by a richer basis set than the  $A$  and  $B$  components alone. This discrepancy causes inconsistencies when comparing total energies, such as when computing interaction energies. The same problem is present when dealing with equation (4), since

$Q_{A^*}$  and  $Q_A$  come from calculations with a different number of basis functions, *i.e.*  $Q_A$  misses functions centered on  $B$ . When these functions are present (when computing  $Q_{A^*}$ ), the effect of the BSSE is a net flux of electronic charge in order to partially occupy them.

This un-physical BSSE-caused charge transfer ( $QT^{BSSE}$ ) can be evaluated by doing a calculation on  $A$  and  $B$  when the ghost functions of the other component are present:

$$QT_A^{BSSE} = Q_{A[B]} - Q_A$$

$$QT_B^{BSSE} = Q_{[A]B} - Q_B$$
(6)

where the square brackets mean that only the ghost functions of the component are included.

$QT^{BSSE}$  is always a negative quantity.

The BSSE-corrected charge transfer due to the interaction ( $QT^C$ ) is then computed by removing the spurious charge fluxes of equations (6) from the uncorrected charge transfer of equation (4):

$$QT_{B \rightarrow A}^C = QT_{B \rightarrow A} - QT_A^{BSSE} + QT_B^{BSSE}$$
(7)

where signs are conveniently put to account for charge fluxes directions.

## Bibliography

- (1) Dovesi, R.; Orlando, R.; Erba, A.; Zicovich-Wilson, C. M.; Civalleri, B.; Casassa, S.; Maschio, L.; Ferrabone, M.; De La Pierre, M.; D'Arco, P.; Noël, Y.; Causà, M.; Rérat, M.; Kirtman, B. *Int. J. Quantum Chem.* **2014**, *114* (19), 1287.
- (2) Orlando, R.; Delle Piane, M.; Bush, I. J.; Ugliengo, P.; Ferrabone, M.; Dovesi, R. *J. Comput. Chem.* **2012**, *33* (28), 2276.
- (3) Becke, A. D. *J. Chem. Phys.* **1993**, *98* (7), 5648.
- (4) Dovesi, R.; Saunders, V. R.; Roetti, C.; Orlando, R.; Zicovich-Wilson, C. M.; Pascale, F.; Civalleri, B.; Doll, K.; Harrison, N. M.; Bush, I. J.; D'Arco, P.; Llunell, M.; Causà, M.; Noël, Y. *CRYSTAL14, User's Manual*; Università di Torino: Torino, Italy, 2014.
- (5) Monkhorst, H. J.; Pack, J. D. *Phys. Rev. B.* **1976**, *8*, 5188.
- (6) Saunders, V. R.; Hillier, I. H. *Int. J. Quantum Chem.* **1973**, *7* (4), 699.
- (7) Grimme, S. *J. Comput. Chem.* **2006**, *27* (15), 1787.
- (8) Civalleri, B.; Zicovich-Wilson, C. M.; Valenzano, L.; Ugliengo, P. *CrystEngComm* **2008**, *10* (4), 405.
- (9) Francl, M. M.; Pietro, W. J.; Hehre, W. J.; Binkley, J. S.; Gordon, M. S.; DeFrees, D. J.;

- Pople, J. A. *J. Chem. Phys.* **1982**, 77 (7).
- (10) Schäfer, A.; Horn, H.; Ahlrichs, R. *J. Chem. Phys.* **1992**, 97, 2571.
- (11) Broyden, C. G. *IMA J. Appl. Math.* **1970**, 6 (1), 76.
- (12) Bernhard Schlegel, H. *Theor. Chim. Acta* **1984**, 66 (5), 333.
- (13) Delle Piane, M.; Corno, M.; Ugliengo, P. *J. Chem. Theory Comput.* **2013**, 9 (5), 2404.
- (14) Boys, S. F.; Bernardi, F. *Mol. Phys.* **1970**, 19 (4), 553.
- (15) Martínez, L.; Andrade, R.; Birgin, E. G.; Martínez, J. M. *J. Comput. Chem.* **2009**, 30 (13), 2157.
- (16) Hutter, J.; Iannuzzi, M.; Schiffmann, F.; Vandevondele, J. *Wiley Interdiscip. Rev. Comput. Mol. Sci.* **2014**, 4 (1), 15.

## Supporting tables

**Table S1. Energetics of the crambin crystal formation (HSE06-D\*/6-31G(d,p)//B3LYP-D\*/6-31G(d,p)).**

| Process                                 | <i>n</i> | $\Delta E^C$ <sup>a</sup> | $\Delta E^{CD}$ <sup>b</sup> | disp <sup>c</sup> |
|-----------------------------------------|----------|---------------------------|------------------------------|-------------------|
| 2P + <i>n</i> W → CRY( <i>n</i> W)      | 0        | +100 [+0.1]               | -1350 [-1.1]                 | -1450 [-1.1]      |
|                                         | 84       | -4448 [-2.9]              | -7380 [-4.8]                 | -2932 [-1.9]      |
| -----                                   |          |                           |                              |                   |
| CRY(0W) + <i>n</i> W → CRY( <i>n</i> W) | 84       | -4548 (-54)               | -6029 (-72)                  | -1482 (-17)       |

<sup>a</sup> Reaction energies as in Table 3, without including dispersion, but at the HSE06/6-31G(d,p)//B3LYP-D\*/6-31G(d,p) level of theory (in the *x/y* notation *x* is the level at which the energy is computed, *y* is the level at which the geometry has been optimized). <sup>b</sup> As <sup>a</sup>, but obtained with dispersion (HSE06-D\*/6-31G(d,p)//B3LYP-D\*/6-31G(d,p)). In square brackets, the atom contribution to some formation energies. In parentheses, the contribution for each individual water molecule (when applicable) is reported. <sup>c</sup> Dispersion contribution evaluated as:  $\Delta E^{CD} - \Delta E^C$ . P: crambin molecule in gas phase. W: water molecule in gas phase. CRY: crambin crystal in the two 0W, 84W cases. All values are in kJ·mol<sup>-1</sup>.

**Table S2. Energetics of the crambin crystal formation (B3LYP-D\*/6-31G//B3LYP-D\*/6-31G(d,p)).**

| Process                                 | <i>n</i> | $\Delta E^C$ <sup>a</sup> | $\Delta E^{CD}$ <sup>b</sup> | disp <sup>c</sup> |
|-----------------------------------------|----------|---------------------------|------------------------------|-------------------|
| 2P + <i>n</i> W → CRY( <i>n</i> W)      | 0        | +353 [+0.3]               | -1097 [-0.9]                 | -1450 [-1.1]      |
|                                         | 84       | -5416 [-3.5]              | -8348 [-5.4]                 | -2932 [-1.9]      |
| -----                                   |          |                           |                              |                   |
| CRY(0W) + <i>n</i> W → CRY( <i>n</i> W) | 84       | -5769 (-69)               | -7251 (-86)                  | -1482 (-17)       |

<sup>a</sup> Reaction energies as in Table 3, without including dispersion, but at the B3LYP/6-31G//B3LYP-D\*/6-31G(d,p) level of theory (in the *x/y* notation *x* is the level at which the energy is computed, *y* is the level at which the geometry has been optimized). <sup>b</sup> As <sup>a</sup>, but obtained with dispersion (B3LYP-D\*/6-31G//B3LYP-D\*/6-31G(d,p)). In square brackets, the atom contribution to some formation energies. In parentheses, the contribution for each individual water molecule (when applicable) is reported. <sup>c</sup> Dispersion contribution evaluated as:  $\Delta E^{CD} - \Delta E^C$ . P: crambin molecule in gas phase. W: water molecule in gas phase. CRY: crambin crystal in the two 0W, 84W cases. All values are in kJ·mol<sup>-1</sup>.

**Table S3. Energetics of the crambin crystal formation (B3LYP-D3/6-31G(d,p)//B3LYP-D\*/6-31G(d,p)).**

| Process                                 | <i>n</i> | $\Delta E^C$ <sup>a</sup> | $\Delta E^{CD}$ <sup>b</sup> | disp <sup>c</sup> |
|-----------------------------------------|----------|---------------------------|------------------------------|-------------------|
| 2P + <i>n</i> W → CRY( <i>n</i> W)      | 0        | +442 [+0.3]               | -1031 [-0.8]                 | -1473 [-1.1]      |
|                                         | 84       | -3400 [-2.2]              | -6593 [-4.3]                 | -3193 [-2.1]      |
| -----                                   |          |                           |                              |                   |
| CRY(0W) + <i>n</i> W → CRY( <i>n</i> W) | 84       | -3842 (-46)               | -5562 (-66)                  | -1719 (-20)       |

<sup>a</sup> Reaction energies as in Table 3, without including dispersion, but at the B3LYP/6-31G//B3LYP-D\*/6-31G(d,p) level of theory (in the *x/y* notation *x* is the level at which the energy is computed, *y* is the level at which the geometry has been optimized). <sup>b</sup> As <sup>a</sup>, but obtained with dispersion (B3LYP-D3/6-31G//B3LYP-D\*/6-31G(d,p)). In square brackets, the atom contribution to some formation energies. In parentheses, the



contribution for each individual water molecule (when applicable) is reported. <sup>c</sup> Dispersion contribution evaluated as:  $\Delta E^{CD} - \Delta E^C$ . P: crambin molecule in gas phase. W: water molecule in gas phase. CRY: crambin crystal in the two 0W, 84W cases. All values are in  $\text{kJ}\cdot\text{mol}^{-1}$ .

## OPTIMIZED GEOMETRIES (PDB files)

### 1) CRAMBIN – optimized gas phase molecule

| COMPND | CRAMBIN OPTIMIZED GAS PHASE GEOMETRY          |      |     |   |   |        |        |        |      |      |   |
|--------|-----------------------------------------------|------|-----|---|---|--------|--------|--------|------|------|---|
| AUTHOR | DELLE PIANE, CORNO, ORLANDO, DOVESI, UGLIENGO |      |     |   |   |        |        |        |      |      |   |
| ATOM   | 1                                             | N    | THR | A | 1 | -2.493 | -4.567 | 8.109  | 1.00 | 0.00 | N |
| ATOM   | 2                                             | CA   | THR | A | 1 | -2.060 | -3.222 | 7.634  | 1.00 | 0.00 | C |
| ATOM   | 3                                             | C    | THR | A | 1 | -1.713 | -3.328 | 6.152  | 1.00 | 0.00 | C |
| ATOM   | 4                                             | O    | THR | A | 1 | -1.368 | -4.430 | 5.706  | 1.00 | 0.00 | O |
| ATOM   | 5                                             | CB   | THR | A | 1 | -0.845 | -2.831 | 8.536  | 1.00 | 0.00 | C |
| ATOM   | 6                                             | OG1  | THR | A | 1 | -1.235 | -3.236 | 9.845  | 1.00 | 0.00 | O |
| ATOM   | 7                                             | CG2  | THR | A | 1 | -0.504 | -1.352 | 8.479  | 1.00 | 0.00 | C |
| ATOM   | 8                                             | H1   | THR | A | 1 | -1.902 | -5.349 | 7.727  | 1.00 | 0.00 | H |
| ATOM   | 9                                             | H2   | THR | A | 1 | -3.471 | -4.785 | 7.905  | 1.00 | 0.00 | H |
| ATOM   | 10                                            | H3   | THR | A | 1 | -2.314 | -4.520 | 9.139  | 1.00 | 0.00 | H |
| ATOM   | 11                                            | HA   | THR | A | 1 | -2.888 | -2.520 | 7.818  | 1.00 | 0.00 | H |
| ATOM   | 12                                            | HB   | THR | A | 1 | 0.022  | -3.430 | 8.203  | 1.00 | 0.00 | H |
| ATOM   | 13                                            | HG1  | THR | A | 1 | -0.454 | -3.685 | 10.265 | 1.00 | 0.00 | H |
| ATOM   | 14                                            | HG21 | THR | A | 1 | 0.313  | -1.153 | 9.186  | 1.00 | 0.00 | H |
| ATOM   | 15                                            | HG22 | THR | A | 1 | -1.369 | -0.741 | 8.785  | 1.00 | 0.00 | H |
| ATOM   | 16                                            | HG23 | THR | A | 1 | -0.170 | -1.043 | 7.478  | 1.00 | 0.00 | H |
| ATOM   | 17                                            | N    | THR | A | 2 | -1.793 | -2.206 | 5.427  | 1.00 | 0.00 | N |
| ATOM   | 18                                            | CA   | THR | A | 2 | -1.137 | -2.097 | 4.124  | 1.00 | 0.00 | C |
| ATOM   | 19                                            | C    | THR | A | 2 | 0.122  | -1.250 | 4.368  | 1.00 | 0.00 | C |
| ATOM   | 20                                            | O    | THR | A | 2 | 0.075  | -0.294 | 5.161  | 1.00 | 0.00 | O |
| ATOM   | 21                                            | CB   | THR | A | 2 | -2.063 | -1.552 | 3.023  | 1.00 | 0.00 | C |
| ATOM   | 22                                            | OG1  | THR | A | 2 | -2.368 | -0.190 | 3.328  | 1.00 | 0.00 | O |
| ATOM   | 23                                            | CG2  | THR | A | 2 | -3.331 | -2.392 | 2.887  | 1.00 | 0.00 | C |
| ATOM   | 24                                            | H    | THR | A | 2 | -1.960 | -1.315 | 5.892  | 1.00 | 0.00 | H |
| ATOM   | 25                                            | HA   | THR | A | 2 | -0.839 | -3.106 | 3.821  | 1.00 | 0.00 | H |
| ATOM   | 26                                            | HB   | THR | A | 2 | -1.482 | -1.607 | 2.083  | 1.00 | 0.00 | H |
| ATOM   | 27                                            | HG1  | THR | A | 2 | -2.944 | 0.139  | 2.612  | 1.00 | 0.00 | H |
| ATOM   | 28                                            | HG21 | THR | A | 2 | -3.077 | -3.443 | 2.686  | 1.00 | 0.00 | H |
| ATOM   | 29                                            | HG22 | THR | A | 2 | -3.976 | -2.032 | 2.073  | 1.00 | 0.00 | H |
| ATOM   | 30                                            | HG23 | THR | A | 2 | -3.919 | -2.349 | 3.817  | 1.00 | 0.00 | H |
| ATOM   | 31                                            | N    | CYS | A | 3 | 1.213  | -1.660 | 3.715  | 1.00 | 0.00 | N |
| ATOM   | 32                                            | CA   | CYS | A | 3 | 2.550  | -1.144 | 3.967  | 1.00 | 0.00 | C |
| ATOM   | 33                                            | C    | CYS | A | 3 | 3.195  | -0.865 | 2.610  | 1.00 | 0.00 | C |
| ATOM   | 34                                            | O    | CYS | A | 3 | 3.005  | -1.676 | 1.688  | 1.00 | 0.00 | O |
| ATOM   | 35                                            | CB   | CYS | A | 3 | 3.420  | -2.169 | 4.709  | 1.00 | 0.00 | C |
| ATOM   | 36                                            | SG   | CYS | A | 3 | 2.800  | -2.673 | 6.361  | 1.00 | 0.00 | S |
| ATOM   | 37                                            | H    | CYS | A | 3 | 1.135  | -2.464 | 3.081  | 1.00 | 0.00 | H |
| ATOM   | 38                                            | HA   | CYS | A | 3 | 2.476  | -0.232 | 4.567  | 1.00 | 0.00 | H |
| ATOM   | 39                                            | HB1  | CYS | A | 3 | 3.478  | -3.108 | 4.140  | 1.00 | 0.00 | H |
| ATOM   | 40                                            | HB2  | CYS | A | 3 | 4.429  | -1.750 | 4.826  | 1.00 | 0.00 | H |
| ATOM   | 41                                            | N    | CYS | A | 4 | 3.971  | 0.214  | 2.486  | 1.00 | 0.00 | N |
| ATOM   | 42                                            | CA   | CYS | A | 4 | 4.538  | 0.541  | 1.190  | 1.00 | 0.00 | C |
| ATOM   | 43                                            | C    | CYS | A | 4 | 6.042  | 0.804  | 1.323  | 1.00 | 0.00 | C |
| ATOM   | 44                                            | O    | CYS | A | 4 | 6.498  | 1.386  | 2.314  | 1.00 | 0.00 | O |
| ATOM   | 45                                            | CB   | CYS | A | 4 | 3.831  | 1.760  | 0.576  | 1.00 | 0.00 | C |
| ATOM   | 46                                            | SG   | CYS | A | 4 | 2.031  | 1.514  | 0.294  | 1.00 | 0.00 | S |
| ATOM   | 47                                            | H    | CYS | A | 4 | 4.102  | 0.892  | 3.252  | 1.00 | 0.00 | H |
| ATOM   | 48                                            | HA   | CYS | A | 4 | 4.366  | -0.328 | 0.549  | 1.00 | 0.00 | H |
| ATOM   | 49                                            | HB1  | CYS | A | 4 | 3.888  | 2.622  | 1.256  | 1.00 | 0.00 | H |
| ATOM   | 50                                            | HB2  | CYS | A | 4 | 4.289  | 2.055  | -0.378 | 1.00 | 0.00 | H |
| ATOM   | 51                                            | N    | PRO | A | 5 | 6.817  | 0.438  | 0.277  | 1.00 | 0.00 | N |

|      |     |      |     |   |   |       |        |        |      |      |   |
|------|-----|------|-----|---|---|-------|--------|--------|------|------|---|
| ATOM | 52  | CA   | PRO | A | 5 | 8.281 | 0.590  | 0.341  | 1.00 | 0.00 | C |
| ATOM | 53  | C    | PRO | A | 5 | 8.756 | 1.967  | -0.134 | 1.00 | 0.00 | C |
| ATOM | 54  | O    | PRO | A | 5 | 9.945 | 2.246  | -0.209 | 1.00 | 0.00 | O |
| ATOM | 55  | CB   | PRO | A | 5 | 8.778 | -0.561 | -0.543 | 1.00 | 0.00 | C |
| ATOM | 56  | CG   | PRO | A | 5 | 7.709 | -0.659 | -1.641 | 1.00 | 0.00 | C |
| ATOM | 57  | CD   | PRO | A | 5 | 6.392 | -0.309 | -0.930 | 1.00 | 0.00 | C |
| ATOM | 58  | HA   | PRO | A | 5 | 8.647 | 0.480  | 1.372  | 1.00 | 0.00 | H |
| ATOM | 59  | HB1  | PRO | A | 5 | 9.789 | -0.365 | -0.920 | 1.00 | 0.00 | H |
| ATOM | 60  | HB2  | PRO | A | 5 | 8.812 | -1.476 | 0.066  | 1.00 | 0.00 | H |
| ATOM | 61  | HG1  | PRO | A | 5 | 7.912 | 0.067  | -2.447 | 1.00 | 0.00 | H |
| ATOM | 62  | HG2  | PRO | A | 5 | 7.653 | -1.657 | -2.096 | 1.00 | 0.00 | H |
| ATOM | 63  | HD1  | PRO | A | 5 | 5.719 | 0.296  | -1.556 | 1.00 | 0.00 | H |
| ATOM | 64  | HD2  | PRO | A | 5 | 5.863 | -1.220 | -0.635 | 1.00 | 0.00 | H |
| ATOM | 65  | N    | SER | A | 6 | 7.776 | 2.869  | -0.478 | 1.00 | 0.00 | N |
| ATOM | 66  | CA   | SER | A | 6 | 8.091 | 4.274  | -0.631 | 1.00 | 0.00 | C |
| ATOM | 67  | C    | SER | A | 6 | 6.809 | 5.094  | -0.551 | 1.00 | 0.00 | C |
| ATOM | 68  | O    | SER | A | 6 | 5.714 | 4.615  | -0.869 | 1.00 | 0.00 | O |
| ATOM | 69  | CB   | SER | A | 6 | 8.765 | 4.550  | -1.995 | 1.00 | 0.00 | C |
| ATOM | 70  | OG   | SER | A | 6 | 7.904 | 4.281  | -3.102 | 1.00 | 0.00 | O |
| ATOM | 71  | H    | SER | A | 6 | 6.806 | 2.633  | -0.305 | 1.00 | 0.00 | H |
| ATOM | 72  | HA   | SER | A | 6 | 8.790 | 4.596  | 0.158  | 1.00 | 0.00 | H |
| ATOM | 73  | HB1  | SER | A | 6 | 9.045 | 5.611  | -2.064 | 1.00 | 0.00 | H |
| ATOM | 74  | HB2  | SER | A | 6 | 9.682 | 3.945  | -2.047 | 1.00 | 0.00 | H |
| ATOM | 75  | H    | SER | A | 6 | 7.762 | 3.319  | -3.126 | 1.00 | 0.00 | H |
| ATOM | 76  | N    | ILE | A | 7 | 7.009 | 6.405  | -0.250 | 1.00 | 0.00 | N |
| ATOM | 77  | CA   | ILE | A | 7 | 5.904 | 7.360  | -0.292 | 1.00 | 0.00 | C |
| ATOM | 78  | C    | ILE | A | 7 | 5.288 | 7.414  | -1.690 | 1.00 | 0.00 | C |
| ATOM | 79  | O    | ILE | A | 7 | 4.077 | 7.654  | -1.816 | 1.00 | 0.00 | O |
| ATOM | 80  | CB   | ILE | A | 7 | 6.385 | 8.770  | 0.169  | 1.00 | 0.00 | C |
| ATOM | 81  | CG1  | ILE | A | 7 | 6.611 | 8.774  | 1.697  | 1.00 | 0.00 | C |
| ATOM | 82  | CG2  | ILE | A | 7 | 5.429 | 9.888  | -0.269 | 1.00 | 0.00 | C |
| ATOM | 83  | CD1  | ILE | A | 7 | 7.327 | 10.014 | 2.236  | 1.00 | 0.00 | C |
| ATOM | 84  | H    | ILE | A | 7 | 7.737 | 6.533  | 0.474  | 1.00 | 0.00 | H |
| ATOM | 85  | HA   | ILE | A | 7 | 5.077 | 7.032  | 0.359  | 1.00 | 0.00 | H |
| ATOM | 86  | HB   | ILE | A | 7 | 7.359 | 8.939  | -0.327 | 1.00 | 0.00 | H |
| ATOM | 87  | HG11 | ILE | A | 7 | 5.630 | 8.660  | 2.195  | 1.00 | 0.00 | H |
| ATOM | 88  | HG12 | ILE | A | 7 | 7.204 | 7.895  | 1.981  | 1.00 | 0.00 | H |
| ATOM | 89  | HG21 | ILE | A | 7 | 5.365 | 9.985  | -1.362 | 1.00 | 0.00 | H |
| ATOM | 90  | HG22 | ILE | A | 7 | 5.776 | 10.857 | 0.116  | 1.00 | 0.00 | H |
| ATOM | 91  | HG23 | ILE | A | 7 | 4.409 | 9.719  | 0.110  | 1.00 | 0.00 | H |
| ATOM | 92  | HD11 | ILE | A | 7 | 8.303 | 10.157 | 1.743  | 1.00 | 0.00 | H |
| ATOM | 93  | HD12 | ILE | A | 7 | 7.518 | 9.906  | 3.315  | 1.00 | 0.00 | H |
| ATOM | 94  | HD13 | ILE | A | 7 | 6.744 | 10.938 | 2.099  | 1.00 | 0.00 | H |
| ATOM | 95  | N    | VAL | A | 8 | 6.093 | 7.247  | -2.756 | 1.00 | 0.00 | N |
| ATOM | 96  | CA   | VAL | A | 8 | 5.562 | 7.224  | -4.121 | 1.00 | 0.00 | C |
| ATOM | 97  | C    | VAL | A | 8 | 4.579 | 6.052  | -4.308 | 1.00 | 0.00 | C |
| ATOM | 98  | O    | VAL | A | 8 | 3.460 | 6.240  | -4.797 | 1.00 | 0.00 | O |
| ATOM | 99  | CB   | VAL | A | 8 | 6.704 | 7.195  | -5.164 | 1.00 | 0.00 | C |
| ATOM | 100 | CG1  | VAL | A | 8 | 6.142 | 6.973  | -6.576 | 1.00 | 0.00 | C |
| ATOM | 101 | CG2  | VAL | A | 8 | 7.545 | 8.477  | -5.095 | 1.00 | 0.00 | C |
| ATOM | 102 | H    | VAL | A | 8 | 7.058 | 6.982  | -2.586 | 1.00 | 0.00 | H |
| ATOM | 103 | HA   | VAL | A | 8 | 4.950 | 8.127  | -4.266 | 1.00 | 0.00 | H |
| ATOM | 104 | HB   | VAL | A | 8 | 7.352 | 6.334  | -4.914 | 1.00 | 0.00 | H |
| ATOM | 105 | HG11 | VAL | A | 8 | 5.634 | 6.003  | -6.674 | 1.00 | 0.00 | H |
| ATOM | 106 | HG12 | VAL | A | 8 | 6.955 | 7.002  | -7.316 | 1.00 | 0.00 | H |
| ATOM | 107 | HG13 | VAL | A | 8 | 5.410 | 7.753  | -6.843 | 1.00 | 0.00 | H |
| ATOM | 108 | HG21 | VAL | A | 8 | 8.394 | 8.421  | -5.794 | 1.00 | 0.00 | H |
| ATOM | 109 | HG22 | VAL | A | 8 | 7.958 | 8.659  | -4.091 | 1.00 | 0.00 | H |
| ATOM | 110 | HG23 | VAL | A | 8 | 6.942 | 9.359  | -5.370 | 1.00 | 0.00 | H |
| ATOM | 111 | N    | ALA | A | 9 | 5.025 | 4.839  | -3.922 | 1.00 | 0.00 | N |
| ATOM | 112 | CA   | ALA | A | 9 | 4.155 | 3.667  | -3.958 | 1.00 | 0.00 | C |
| ATOM | 113 | C    | ALA | A | 9 | 2.876 | 3.909  | -3.135 | 1.00 | 0.00 | C |
| ATOM | 114 | O    | ALA | A | 9 | 1.777 | 3.569  | -3.590 | 1.00 | 0.00 | O |

|      |     |      |     |   |    |        |       |        |      |      |   |
|------|-----|------|-----|---|----|--------|-------|--------|------|------|---|
| ATOM | 115 | CB   | ALA | A | 9  | 4.915  | 2.420 | -3.502 | 1.00 | 0.00 | C |
| ATOM | 116 | H    | ALA | A | 9  | 5.948  | 4.753 | -3.492 | 1.00 | 0.00 | H |
| ATOM | 117 | HA   | ALA | A | 9  | 3.792  | 3.526 | -4.986 | 1.00 | 0.00 | H |
| ATOM | 118 | HB1  | ALA | A | 9  | 5.702  | 2.166 | -4.228 | 1.00 | 0.00 | H |
| ATOM | 119 | HB2  | ALA | A | 9  | 4.247  | 1.551 | -3.454 | 1.00 | 0.00 | H |
| ATOM | 120 | HB3  | ALA | A | 9  | 5.367  | 2.584 | -2.513 | 1.00 | 0.00 | H |
| ATOM | 121 | N    | ARG | A | 10 | 3.026  | 4.500 | -1.933 | 1.00 | 0.00 | N |
| ATOM | 122 | CA   | ARG | A | 10 | 1.881  | 4.824 | -1.093 | 1.00 | 0.00 | C |
| ATOM | 123 | C    | ARG | A | 10 | 0.913  | 5.790 | -1.775 | 1.00 | 0.00 | C |
| ATOM | 124 | O    | ARG | A | 10 | -0.312 | 5.636 | -1.644 | 1.00 | 0.00 | O |
| ATOM | 125 | CB   | ARG | A | 10 | 2.345  | 5.423 | 0.244  | 1.00 | 0.00 | C |
| ATOM | 126 | CG   | ARG | A | 10 | 1.194  | 5.798 | 1.187  | 1.00 | 0.00 | C |
| ATOM | 127 | CD   | ARG | A | 10 | 0.304  | 4.642 | 1.649  | 1.00 | 0.00 | C |
| ATOM | 128 | NE   | ARG | A | 10 | 1.041  | 3.785 | 2.569  | 1.00 | 0.00 | N |
| ATOM | 129 | CZ   | ARG | A | 10 | 0.518  | 2.740 | 3.216  | 1.00 | 0.00 | C |
| ATOM | 130 | NH1  | ARG | A | 10 | -0.754 | 2.348 | 2.975  | 1.00 | 0.00 | N |
| ATOM | 131 | NH2  | ARG | A | 10 | 1.246  | 2.115 | 4.138  | 1.00 | 0.00 | N |
| ATOM | 132 | H    | ARG | A | 10 | 3.966  | 4.703 | -1.584 | 1.00 | 0.00 | H |
| ATOM | 133 | HA   | ARG | A | 10 | 1.310  | 3.905 | -0.915 | 1.00 | 0.00 | H |
| ATOM | 134 | HB1  | ARG | A | 10 | 3.028  | 4.721 | 0.740  | 1.00 | 0.00 | H |
| ATOM | 135 | HB2  | ARG | A | 10 | 2.929  | 6.331 | 0.034  | 1.00 | 0.00 | H |
| ATOM | 136 | HG1  | ARG | A | 10 | 1.628  | 6.287 | 2.074  | 1.00 | 0.00 | H |
| ATOM | 137 | HG2  | ARG | A | 10 | 0.545  | 6.542 | 0.703  | 1.00 | 0.00 | H |
| ATOM | 138 | HD1  | ARG | A | 10 | -0.598 | 5.044 | 2.139  | 1.00 | 0.00 | H |
| ATOM | 139 | HD2  | ARG | A | 10 | -0.057 | 4.066 | 0.780  | 1.00 | 0.00 | H |
| ATOM | 140 | HE   | ARG | A | 10 | 2.032  | 4.043 | 2.787  | 1.00 | 0.00 | H |
| ATOM | 141 | HH11 | ARG | A | 10 | -1.209 | 2.661 | 2.125  | 1.00 | 0.00 | H |
| ATOM | 142 | HH12 | ARG | A | 10 | -1.076 | 1.446 | 3.329  | 1.00 | 0.00 | H |
| ATOM | 143 | HH21 | ARG | A | 10 | 2.255  | 2.356 | 4.230  | 1.00 | 0.00 | H |
| ATOM | 144 | HH22 | ARG | A | 10 | 0.858  | 1.303 | 4.624  | 1.00 | 0.00 | H |
| ATOM | 145 | N    | SER | A | 11 | 1.453  | 6.823 | -2.436 | 1.00 | 0.00 | N |
| ATOM | 146 | CA   | SER | A | 11 | 0.641  | 7.816 | -3.122 | 1.00 | 0.00 | C |
| ATOM | 147 | C    | SER | A | 11 | -0.217 | 7.140 | -4.201 | 1.00 | 0.00 | C |
| ATOM | 148 | O    | SER | A | 11 | -1.428 | 7.376 | -4.300 | 1.00 | 0.00 | O |
| ATOM | 149 | CB   | SER | A | 11 | 1.539  | 8.925 | -3.706 | 1.00 | 0.00 | C |
| ATOM | 150 | OG   | SER | A | 11 | 2.213  | 9.657 | -2.706 | 1.00 | 0.00 | O |
| ATOM | 151 | H    | SER | A | 11 | 2.469  | 6.912 | -2.455 | 1.00 | 0.00 | H |
| ATOM | 152 | HA   | SER | A | 11 | -0.066 | 8.268 | -2.411 | 1.00 | 0.00 | H |
| ATOM | 153 | HB1  | SER | A | 11 | 2.235  | 8.480 | -4.439 | 1.00 | 0.00 | H |
| ATOM | 154 | HB2  | SER | A | 11 | 0.890  | 9.630 | -4.247 | 1.00 | 0.00 | H |
| ATOM | 155 | H    | SER | A | 11 | 2.930  | 9.096 | -2.353 | 1.00 | 0.00 | H |
| ATOM | 156 | N    | ASN | A | 12 | 0.445  | 6.281 | -4.997 | 1.00 | 0.00 | N |
| ATOM | 157 | CA   | ASN | A | 12 | -0.229 | 5.506 | -6.028 | 1.00 | 0.00 | C |
| ATOM | 158 | C    | ASN | A | 12 | -1.317 | 4.603 | -5.412 | 1.00 | 0.00 | C |
| ATOM | 159 | O    | ASN | A | 12 | -2.441 | 4.518 | -5.926 | 1.00 | 0.00 | O |
| ATOM | 160 | CB   | ASN | A | 12 | 0.792  | 4.666 | -6.797 | 1.00 | 0.00 | C |
| ATOM | 161 | CG   | ASN | A | 12 | 1.784  | 5.505 | -7.600 | 1.00 | 0.00 | C |
| ATOM | 162 | OD1  | ASN | A | 12 | 1.639  | 6.698 | -7.818 | 1.00 | 0.00 | O |
| ATOM | 163 | ND2  | ASN | A | 12 | 2.870  | 4.800 | -8.049 | 1.00 | 0.00 | N |
| ATOM | 164 | H    | ASN | A | 12 | 1.454  | 6.166 | -4.878 | 1.00 | 0.00 | H |
| ATOM | 165 | HA   | ASN | A | 12 | -0.750 | 6.182 | -6.719 | 1.00 | 0.00 | H |
| ATOM | 166 | HB1  | ASN | A | 12 | 1.339  | 4.010 | -6.103 | 1.00 | 0.00 | H |
| ATOM | 167 | HB2  | ASN | A | 12 | 0.253  | 4.016 | -7.503 | 1.00 | 0.00 | H |
| ATOM | 168 | HD21 | ASN | A | 12 | 2.881  | 3.786 | -8.037 | 1.00 | 0.00 | H |
| ATOM | 169 | HD22 | ASN | A | 12 | 3.479  | 5.267 | -8.713 | 1.00 | 0.00 | H |
| ATOM | 170 | N    | PHE | A | 13 | -0.957 | 3.920 | -4.310 | 1.00 | 0.00 | N |
| ATOM | 171 | CA   | PHE | A | 13 | -1.876 | 3.059 | -3.577 | 1.00 | 0.00 | C |
| ATOM | 172 | C    | PHE | A | 13 | -3.116 | 3.848 | -3.135 | 1.00 | 0.00 | C |
| ATOM | 173 | O    | PHE | A | 13 | -4.253 | 3.380 | -3.296 | 1.00 | 0.00 | O |
| ATOM | 174 | CB   | PHE | A | 13 | -1.113 | 2.426 | -2.384 | 1.00 | 0.00 | C |
| ATOM | 175 | CG   | PHE | A | 13 | -2.004 | 1.778 | -1.352 | 1.00 | 0.00 | C |
| ATOM | 176 | CD2  | PHE | A | 13 | -2.581 | 2.556 | -0.333 | 1.00 | 0.00 | C |
| ATOM | 177 | CD1  | PHE | A | 13 | -2.306 | 0.410 | -1.406 | 1.00 | 0.00 | C |

|      |     |      |     |   |    |         |        |        |      |      |   |
|------|-----|------|-----|---|----|---------|--------|--------|------|------|---|
| ATOM | 178 | CE2  | PHE | A | 13 | -3.475  | 1.985  | 0.574  | 1.00 | 0.00 | C |
| ATOM | 179 | CE1  | PHE | A | 13 | -3.205  | -0.160 | -0.501 | 1.00 | 0.00 | C |
| ATOM | 180 | CZ   | PHE | A | 13 | -3.809  | 0.629  | 0.485  | 1.00 | 0.00 | C |
| ATOM | 181 | H    | PHE | A | 13 | 0.005   | 3.990  | -3.962 | 1.00 | 0.00 | H |
| ATOM | 182 | HA   | PHE | A | 13 | -2.254  | 2.266  | -4.240 | 1.00 | 0.00 | H |
| ATOM | 183 | HB1  | PHE | A | 13 | -0.396  | 1.699  | -2.787 | 1.00 | 0.00 | H |
| ATOM | 184 | HB2  | PHE | A | 13 | -0.532  | 3.223  | -1.906 | 1.00 | 0.00 | H |
| ATOM | 185 | HD2  | PHE | A | 13 | -2.368  | 3.623  | -0.263 | 1.00 | 0.00 | H |
| ATOM | 186 | HD1  | PHE | A | 13 | -1.842  | -0.203 | -2.181 | 1.00 | 0.00 | H |
| ATOM | 187 | HE2  | PHE | A | 13 | -3.938  | 2.619  | 1.335  | 1.00 | 0.00 | H |
| ATOM | 188 | HE1  | PHE | A | 13 | -3.467  | -1.218 | -0.577 | 1.00 | 0.00 | H |
| ATOM | 189 | HZ   | PHE | A | 13 | -4.582  | 0.184  | 1.117  | 1.00 | 0.00 | H |
| ATOM | 190 | N    | ASN | A | 14 | -2.871  | 5.037  | -2.564 | 1.00 | 0.00 | N |
| ATOM | 191 | CA   | ASN | A | 14 | -3.932  | 5.874  | -2.037 | 1.00 | 0.00 | C |
| ATOM | 192 | C    | ASN | A | 14 | -4.902  | 6.327  | -3.141 | 1.00 | 0.00 | C |
| ATOM | 193 | O    | ASN | A | 14 | -6.121  | 6.295  | -2.947 | 1.00 | 0.00 | O |
| ATOM | 194 | CB   | ASN | A | 14 | -3.347  | 7.099  | -1.332 | 1.00 | 0.00 | C |
| ATOM | 195 | CG   | ASN | A | 14 | -2.639  | 6.785  | -0.015 | 1.00 | 0.00 | C |
| ATOM | 196 | OD1  | ASN | A | 14 | -2.770  | 5.726  | 0.590  | 1.00 | 0.00 | O |
| ATOM | 197 | ND2  | ASN | A | 14 | -1.902  | 7.818  | 0.481  | 1.00 | 0.00 | N |
| ATOM | 198 | H    | ASN | A | 14 | -1.899  | 5.323  | -2.406 | 1.00 | 0.00 | H |
| ATOM | 199 | HA   | ASN | A | 14 | -4.539  | 5.296  | -1.326 | 1.00 | 0.00 | H |
| ATOM | 200 | HB1  | ASN | A | 14 | -2.668  | 7.636  | -2.014 | 1.00 | 0.00 | H |
| ATOM | 201 | HB2  | ASN | A | 14 | -4.177  | 7.786  | -1.098 | 1.00 | 0.00 | H |
| ATOM | 202 | HD21 | ASN | A | 14 | -1.680  | 8.633  | -0.078 | 1.00 | 0.00 | H |
| ATOM | 203 | HD22 | ASN | A | 14 | -1.384  | 7.670  | 1.339  | 1.00 | 0.00 | H |
| ATOM | 204 | N    | VAL | A | 15 | -4.338  | 6.764  | -4.288 | 1.00 | 0.00 | N |
| ATOM | 205 | CA   | VAL | A | 15 | -5.155  | 7.132  | -5.440 | 1.00 | 0.00 | C |
| ATOM | 206 | C    | VAL | A | 15 | -6.014  | 5.939  | -5.895 | 1.00 | 0.00 | C |
| ATOM | 207 | O    | VAL | A | 15 | -7.222  | 6.056  | -6.117 | 1.00 | 0.00 | O |
| ATOM | 208 | CB   | VAL | A | 15 | -4.269  | 7.692  | -6.581 | 1.00 | 0.00 | C |
| ATOM | 209 | CG1  | VAL | A | 15 | -5.059  | 7.815  | -7.889 | 1.00 | 0.00 | C |
| ATOM | 210 | CG2  | VAL | A | 15 | -3.650  | 9.038  | -6.179 | 1.00 | 0.00 | C |
| ATOM | 211 | H    | VAL | A | 15 | -3.319  | 6.760  | -4.383 | 1.00 | 0.00 | H |
| ATOM | 212 | HA   | VAL | A | 15 | -5.886  | 7.896  | -5.139 | 1.00 | 0.00 | H |
| ATOM | 213 | HB   | VAL | A | 15 | -3.453  | 6.964  | -6.740 | 1.00 | 0.00 | H |
| ATOM | 214 | HG11 | VAL | A | 15 | -4.427  | 8.257  | -8.674 | 1.00 | 0.00 | H |
| ATOM | 215 | HG12 | VAL | A | 15 | -5.945  | 8.460  | -7.766 | 1.00 | 0.00 | H |
| ATOM | 216 | HG13 | VAL | A | 15 | -5.410  | 6.840  | -8.258 | 1.00 | 0.00 | H |
| ATOM | 217 | HG21 | VAL | A | 15 | -2.978  | 9.402  | -6.972 | 1.00 | 0.00 | H |
| ATOM | 218 | HG22 | VAL | A | 15 | -3.056  | 8.963  | -5.259 | 1.00 | 0.00 | H |
| ATOM | 219 | HG23 | VAL | A | 15 | -4.434  | 9.799  | -6.028 | 1.00 | 0.00 | H |
| ATOM | 220 | N    | CYS | A | 16 | -5.354  | 4.765  | -6.027 | 1.00 | 0.00 | N |
| ATOM | 221 | CA   | CYS | A | 16 | -6.041  | 3.529  | -6.365 | 1.00 | 0.00 | C |
| ATOM | 222 | C    | CYS | A | 16 | -7.206  | 3.233  | -5.407 | 1.00 | 0.00 | C |
| ATOM | 223 | O    | CYS | A | 16 | -8.273  | 2.763  | -5.830 | 1.00 | 0.00 | O |
| ATOM | 224 | CB   | CYS | A | 16 | -4.980  | 2.415  | -6.377 | 1.00 | 0.00 | C |
| ATOM | 225 | SG   | CYS | A | 16 | -5.593  | 0.707  | -6.616 | 1.00 | 0.00 | S |
| ATOM | 226 | H    | CYS | A | 16 | -4.350  | 4.723  | -5.832 | 1.00 | 0.00 | H |
| ATOM | 227 | HA   | CYS | A | 16 | -6.517  | 3.609  | -7.354 | 1.00 | 0.00 | H |
| ATOM | 228 | HB1  | CYS | A | 16 | -4.296  | 2.582  | -7.220 | 1.00 | 0.00 | H |
| ATOM | 229 | HB2  | CYS | A | 16 | -4.393  | 2.453  | -5.451 | 1.00 | 0.00 | H |
| ATOM | 230 | N    | ARG | A | 17 | -7.018  | 3.513  | -4.108 | 1.00 | 0.00 | N |
| ATOM | 231 | CA   | ARG | A | 17 | -8.056  | 3.221  | -3.141 | 1.00 | 0.00 | C |
| ATOM | 232 | C    | ARG | A | 17 | -9.307  | 4.092  | -3.278 | 1.00 | 0.00 | C |
| ATOM | 233 | O    | ARG | A | 17 | -10.370 | 3.648  | -2.798 | 1.00 | 0.00 | O |
| ATOM | 234 | CB   | ARG | A | 17 | -7.530  | 3.340  | -1.699 | 1.00 | 0.00 | C |
| ATOM | 235 | CG   | ARG | A | 17 | -6.622  | 2.187  | -1.269 | 1.00 | 0.00 | C |
| ATOM | 236 | CD   | ARG | A | 17 | -7.306  | 0.824  | -1.245 | 1.00 | 0.00 | C |
| ATOM | 237 | NE   | ARG | A | 17 | -8.323  | 0.670  | -0.186 | 1.00 | 0.00 | N |
| ATOM | 238 | CZ   | ARG | A | 17 | -9.608  | 0.349  | -0.396 | 1.00 | 0.00 | C |
| ATOM | 239 | NH1  | ARG | A | 17 | -10.359 | 0.895  | -1.357 | 1.00 | 0.00 | N |
| ATOM | 240 | NH2  | ARG | A | 17 | -10.170 | -0.566 | 0.423  | 1.00 | 0.00 | N |

|      |     |      |     |   |    |         |        |        |      |      |   |
|------|-----|------|-----|---|----|---------|--------|--------|------|------|---|
| ATOM | 241 | H    | ARG | A | 17 | -6.087  | 3.784  | -3.780 | 1.00 | 0.00 | H |
| ATOM | 242 | HA   | ARG | A | 17 | -8.429  | 2.204  | -3.339 | 1.00 | 0.00 | H |
| ATOM | 243 | HB1  | ARG | A | 17 | -7.010  | 4.306  | -1.603 | 1.00 | 0.00 | H |
| ATOM | 244 | HB2  | ARG | A | 17 | -8.402  | 3.387  | -1.028 | 1.00 | 0.00 | H |
| ATOM | 245 | HG1  | ARG | A | 17 | -5.746  | 2.119  | -1.932 | 1.00 | 0.00 | H |
| ATOM | 246 | HG2  | ARG | A | 17 | -6.220  | 2.404  | -0.267 | 1.00 | 0.00 | H |
| ATOM | 247 | HD1  | ARG | A | 17 | -7.774  | 0.577  | -2.207 | 1.00 | 0.00 | H |
| ATOM | 248 | HD2  | ARG | A | 17 | -6.548  | 0.051  | -1.044 | 1.00 | 0.00 | H |
| ATOM | 249 | HE   | ARG | A | 17 | -7.967  | 0.284  | 0.705  | 1.00 | 0.00 | H |
| ATOM | 250 | HH11 | ARG | A | 17 | -10.081 | 1.728  | -1.878 | 1.00 | 0.00 | H |
| ATOM | 251 | HH12 | ARG | A | 17 | -11.110 | 0.331  | -1.759 | 1.00 | 0.00 | H |
| ATOM | 252 | HH21 | ARG | A | 17 | -9.554  | -0.949 | 1.166  | 1.00 | 0.00 | H |
| ATOM | 253 | HH22 | ARG | A | 17 | -11.172 | -0.517 | 0.572  | 1.00 | 0.00 | H |
| ATOM | 254 | N    | LEU | A | 18 | -9.185  | 5.300  | -3.842 | 1.00 | 0.00 | N |
| ATOM | 255 | CA   | LEU | A | 18 | -10.252 | 6.301  | -3.843 | 1.00 | 0.00 | C |
| ATOM | 256 | C    | LEU | A | 18 | -11.582 | 5.834  | -4.466 | 1.00 | 0.00 | C |
| ATOM | 257 | O    | LEU | A | 18 | -12.628 | 6.095  | -3.875 | 1.00 | 0.00 | O |
| ATOM | 258 | CB   | LEU | A | 18 | -9.782  | 7.614  | -4.487 | 1.00 | 0.00 | C |
| ATOM | 259 | CG   | LEU | A | 18 | -8.632  | 8.346  | -3.768 | 1.00 | 0.00 | C |
| ATOM | 260 | CD1  | LEU | A | 18 | -8.214  | 9.573  | -4.588 | 1.00 | 0.00 | C |
| ATOM | 261 | CD2  | LEU | A | 18 | -8.979  | 8.729  | -2.325 | 1.00 | 0.00 | C |
| ATOM | 262 | H    | LEU | A | 18 | -8.284  | 5.554  | -4.246 | 1.00 | 0.00 | H |
| ATOM | 263 | HA   | LEU | A | 18 | -10.547 | 6.486  | -2.800 | 1.00 | 0.00 | H |
| ATOM | 264 | HB1  | LEU | A | 18 | -9.470  | 7.416  | -5.524 | 1.00 | 0.00 | H |
| ATOM | 265 | HB2  | LEU | A | 18 | -10.665 | 8.274  | -4.536 | 1.00 | 0.00 | H |
| ATOM | 266 | HG   | LEU | A | 18 | -7.766  | 7.668  | -3.724 | 1.00 | 0.00 | H |
| ATOM | 267 | HD11 | LEU | A | 18 | -7.938  | 9.289  | -5.617 | 1.00 | 0.00 | H |
| ATOM | 268 | HD12 | LEU | A | 18 | -7.345  | 10.079 | -4.136 | 1.00 | 0.00 | H |
| ATOM | 269 | HD13 | LEU | A | 18 | -9.029  | 10.314 | -4.656 | 1.00 | 0.00 | H |
| ATOM | 270 | HD21 | LEU | A | 18 | -8.144  | 9.274  | -1.854 | 1.00 | 0.00 | H |
| ATOM | 271 | HD22 | LEU | A | 18 | -9.173  | 7.844  | -1.699 | 1.00 | 0.00 | H |
| ATOM | 272 | HD23 | LEU | A | 18 | -9.871  | 9.377  | -2.277 | 1.00 | 0.00 | H |
| ATOM | 273 | N    | PRO | A | 19 | -11.575 | 5.129  | -5.638 | 1.00 | 0.00 | N |
| ATOM | 274 | CA   | PRO | A | 19 | -12.855 | 4.637  | -6.169 | 1.00 | 0.00 | C |
| ATOM | 275 | C    | PRO | A | 19 | -13.315 | 3.312  | -5.533 | 1.00 | 0.00 | C |
| ATOM | 276 | O    | PRO | A | 19 | -14.281 | 2.706  | -5.989 | 1.00 | 0.00 | O |
| ATOM | 277 | CB   | PRO | A | 19 | -12.592 | 4.483  | -7.675 | 1.00 | 0.00 | C |
| ATOM | 278 | CG   | PRO | A | 19 | -11.099 | 4.142  | -7.728 | 1.00 | 0.00 | C |
| ATOM | 279 | CD   | PRO | A | 19 | -10.490 | 5.030  | -6.640 | 1.00 | 0.00 | C |
| ATOM | 280 | HA   | PRO | A | 19 | -13.654 | 5.359  | -5.948 | 1.00 | 0.00 | H |
| ATOM | 281 | HB1  | PRO | A | 19 | -13.246 | 3.722  | -8.118 | 1.00 | 0.00 | H |
| ATOM | 282 | HB2  | PRO | A | 19 | -12.789 | 5.442  | -8.181 | 1.00 | 0.00 | H |
| ATOM | 283 | HG1  | PRO | A | 19 | -10.941 | 3.078  | -7.488 | 1.00 | 0.00 | H |
| ATOM | 284 | HG2  | PRO | A | 19 | -10.641 | 4.325  | -8.710 | 1.00 | 0.00 | H |
| ATOM | 285 | HD1  | PRO | A | 19 | -9.576  | 4.610  | -6.217 | 1.00 | 0.00 | H |
| ATOM | 286 | HD2  | PRO | A | 19 | -10.254 | 6.031  | -7.040 | 1.00 | 0.00 | H |
| ATOM | 287 | N    | GLY | A | 20 | -12.593 | 2.869  | -4.464 | 1.00 | 0.00 | N |
| ATOM | 288 | CA   | GLY | A | 20 | -13.001 | 1.719  | -3.703 | 1.00 | 0.00 | C |
| ATOM | 289 | C    | GLY | A | 20 | -12.147 | 0.471  | -3.904 | 1.00 | 0.00 | C |
| ATOM | 290 | O    | GLY | A | 20 | -12.325 | -0.534 | -3.193 | 1.00 | 0.00 | O |
| ATOM | 291 | H    | GLY | A | 20 | -11.856 | 3.444  | -4.053 | 1.00 | 0.00 | H |
| ATOM | 292 | HA1  | GLY | A | 20 | -13.007 | 1.947  | -2.626 | 1.00 | 0.00 | H |
| ATOM | 293 | HA2  | GLY | A | 20 | -14.025 | 1.445  | -3.999 | 1.00 | 0.00 | H |
| ATOM | 294 | N    | THR | A | 21 | -11.205 | 0.534  | -4.861 | 1.00 | 0.00 | N |
| ATOM | 295 | CA   | THR | A | 21 | -10.501 | -0.628 | -5.359 | 1.00 | 0.00 | C |
| ATOM | 296 | C    | THR | A | 21 | -9.988  | -1.505 | -4.211 | 1.00 | 0.00 | C |
| ATOM | 297 | O    | THR | A | 21 | -9.243  | -1.066 | -3.334 | 1.00 | 0.00 | O |
| ATOM | 298 | CB   | THR | A | 21 | -9.294  | -0.175 | -6.218 | 1.00 | 0.00 | C |
| ATOM | 299 | OG1  | THR | A | 21 | -9.714  | 0.851  | -7.101 | 1.00 | 0.00 | O |
| ATOM | 300 | CG2  | THR | A | 21 | -8.705  | -1.351 | -6.987 | 1.00 | 0.00 | C |
| ATOM | 301 | H    | THR | A | 21 | -11.133 | 1.370  | -5.437 | 1.00 | 0.00 | H |
| ATOM | 302 | HA   | THR | A | 21 | -11.184 | -1.200 | -6.006 | 1.00 | 0.00 | H |
| ATOM | 303 | HB   | THR | A | 21 | -8.550  | 0.228  | -5.518 | 1.00 | 0.00 | H |

|      |     |      |     |   |    |         |        |        |      |      |   |
|------|-----|------|-----|---|----|---------|--------|--------|------|------|---|
| ATOM | 304 | HG1  | THR | A | 21 | -9.134  | 1.620  | -6.909 | 1.00 | 0.00 | H |
| ATOM | 305 | HG21 | THR | A | 21 | -8.398  | -2.157 | -6.304 | 1.00 | 0.00 | H |
| ATOM | 306 | HG22 | THR | A | 21 | -7.823  | -1.024 | -7.554 | 1.00 | 0.00 | H |
| ATOM | 307 | HG23 | THR | A | 21 | -9.439  | -1.749 | -7.707 | 1.00 | 0.00 | H |
| ATOM | 308 | N    | PRO | A | 22 | -10.290 | -2.834 | -4.267 | 1.00 | 0.00 | N |
| ATOM | 309 | CA   | PRO | A | 22 | -9.824  | -3.699 | -3.195 | 1.00 | 0.00 | C |
| ATOM | 310 | C    | PRO | A | 22 | -8.313  | -3.624 | -2.964 | 1.00 | 0.00 | C |
| ATOM | 311 | O    | PRO | A | 22 | -7.493  | -3.619 | -3.888 | 1.00 | 0.00 | O |
| ATOM | 312 | CB   | PRO | A | 22 | -10.258 | -5.098 | -3.664 | 1.00 | 0.00 | C |
| ATOM | 313 | CG   | PRO | A | 22 | -11.583 | -4.814 | -4.379 | 1.00 | 0.00 | C |
| ATOM | 314 | CD   | PRO | A | 22 | -11.335 | -3.475 | -5.087 | 1.00 | 0.00 | C |
| ATOM | 315 | HA   | PRO | A | 22 | -10.336 | -3.427 | -2.252 | 1.00 | 0.00 | H |
| ATOM | 316 | HB1  | PRO | A | 22 | -9.509  | -5.486 | -4.375 | 1.00 | 0.00 | H |
| ATOM | 317 | HB2  | PRO | A | 22 | -10.347 | -5.808 | -2.830 | 1.00 | 0.00 | H |
| ATOM | 318 | HG1  | PRO | A | 22 | -11.875 | -5.609 | -5.079 | 1.00 | 0.00 | H |
| ATOM | 319 | HG2  | PRO | A | 22 | -12.393 | -4.704 | -3.640 | 1.00 | 0.00 | H |
| ATOM | 320 | HD1  | PRO | A | 22 | -10.977 | -3.622 | -6.118 | 1.00 | 0.00 | H |
| ATOM | 321 | HD2  | PRO | A | 22 | -12.240 | -2.853 | -5.112 | 1.00 | 0.00 | H |
| ATOM | 322 | N    | GLU | A | 23 | -7.972  | -3.743 | -1.655 | 1.00 | 0.00 | N |
| ATOM | 323 | CA   | GLU | A | 23 | -6.615  | -3.615 | -1.127 | 1.00 | 0.00 | C |
| ATOM | 324 | C    | GLU | A | 23 | -5.588  | -4.395 | -1.941 | 1.00 | 0.00 | C |
| ATOM | 325 | O    | GLU | A | 23 | -4.486  | -3.904 | -2.195 | 1.00 | 0.00 | O |
| ATOM | 326 | CB   | GLU | A | 23 | -6.558  | -4.113 | 0.335  | 1.00 | 0.00 | C |
| ATOM | 327 | CG   | GLU | A | 23 | -7.444  | -3.346 | 1.316  | 1.00 | 0.00 | C |
| ATOM | 328 | CD   | GLU | A | 23 | -7.094  | -1.847 | 1.443  | 1.00 | 0.00 | C |
| ATOM | 329 | OE1  | GLU | A | 23 | -5.968  | -1.484 | 1.029  | 1.00 | 0.00 | O |
| ATOM | 330 | OE2  | GLU | A | 23 | -7.991  | -1.104 | 1.948  | 1.00 | 0.00 | O |
| ATOM | 331 | H    | GLU | A | 23 | -8.713  | -3.546 | -0.988 | 1.00 | 0.00 | H |
| ATOM | 332 | HA   | GLU | A | 23 | -6.286  | -2.567 | -1.155 | 1.00 | 0.00 | H |
| ATOM | 333 | HB1  | GLU | A | 23 | -6.812  | -5.186 | 0.357  | 1.00 | 0.00 | H |
| ATOM | 334 | HB2  | GLU | A | 23 | -5.513  | -4.013 | 0.655  | 1.00 | 0.00 | H |
| ATOM | 335 | HG1  | GLU | A | 23 | -8.519  | -3.441 | 1.082  | 1.00 | 0.00 | H |
| ATOM | 336 | HG2  | GLU | A | 23 | -7.341  | -3.798 | 2.317  | 1.00 | 0.00 | H |
| ATOM | 337 | N    | ALA | A | 24 | -5.903  | -5.672 | -2.278 | 1.00 | 0.00 | N |
| ATOM | 338 | CA   | ALA | A | 24 | -4.950  | -6.544 | -2.951 | 1.00 | 0.00 | C |
| ATOM | 339 | C    | ALA | A | 24 | -4.503  | -5.993 | -4.315 | 1.00 | 0.00 | C |
| ATOM | 340 | O    | ALA | A | 24 | -3.342  | -6.176 | -4.692 | 1.00 | 0.00 | O |
| ATOM | 341 | CB   | ALA | A | 24 | -5.529  | -7.950 | -3.107 | 1.00 | 0.00 | C |
| ATOM | 342 | H    | ALA | A | 24 | -6.833  | -6.014 | -2.060 | 1.00 | 0.00 | H |
| ATOM | 343 | HA   | ALA | A | 24 | -4.029  | -6.590 | -2.355 | 1.00 | 0.00 | H |
| ATOM | 344 | HB1  | ALA | A | 24 | -5.756  | -8.390 | -2.124 | 1.00 | 0.00 | H |
| ATOM | 345 | HB2  | ALA | A | 24 | -4.797  | -8.596 | -3.612 | 1.00 | 0.00 | H |
| ATOM | 346 | HB3  | ALA | A | 24 | -6.449  | -7.938 | -3.713 | 1.00 | 0.00 | H |
| ATOM | 347 | N    | LEU | A | 25 | -5.451  | -5.391 | -5.066 | 1.00 | 0.00 | N |
| ATOM | 348 | CA   | LEU | A | 25 | -5.115  | -4.798 | -6.357 | 1.00 | 0.00 | C |
| ATOM | 349 | C    | LEU | A | 25 | -4.272  | -3.526 | -6.201 | 1.00 | 0.00 | C |
| ATOM | 350 | O    | LEU | A | 25 | -3.357  | -3.274 | -6.984 | 1.00 | 0.00 | O |
| ATOM | 351 | CB   | LEU | A | 25 | -6.381  | -4.497 | -7.173 | 1.00 | 0.00 | C |
| ATOM | 352 | CG   | LEU | A | 25 | -7.313  | -5.696 | -7.430 | 1.00 | 0.00 | C |
| ATOM | 353 | CD1  | LEU | A | 25 | -8.547  | -5.234 | -8.216 | 1.00 | 0.00 | C |
| ATOM | 354 | CD2  | LEU | A | 25 | -6.600  | -6.860 | -8.128 | 1.00 | 0.00 | C |
| ATOM | 355 | H    | LEU | A | 25 | -6.307  | -5.075 | -4.606 | 1.00 | 0.00 | H |
| ATOM | 356 | HA   | LEU | A | 25 | -4.452  | -5.494 | -6.886 | 1.00 | 0.00 | H |
| ATOM | 357 | HB1  | LEU | A | 25 | -6.949  | -3.703 | -6.664 | 1.00 | 0.00 | H |
| ATOM | 358 | HB2  | LEU | A | 25 | -6.048  | -4.069 | -8.135 | 1.00 | 0.00 | H |
| ATOM | 359 | HG   | LEU | A | 25 | -7.668  | -6.063 | -6.448 | 1.00 | 0.00 | H |
| ATOM | 360 | HD11 | LEU | A | 25 | -9.067  | -4.412 | -7.699 | 1.00 | 0.00 | H |
| ATOM | 361 | HD12 | LEU | A | 25 | -9.267  | -6.057 | -8.353 | 1.00 | 0.00 | H |
| ATOM | 362 | HD13 | LEU | A | 25 | -8.269  | -4.867 | -9.218 | 1.00 | 0.00 | H |
| ATOM | 363 | HD21 | LEU | A | 25 | -7.299  | -7.687 | -8.333 | 1.00 | 0.00 | H |
| ATOM | 364 | HD22 | LEU | A | 25 | -5.782  | -7.270 | -7.516 | 1.00 | 0.00 | H |
| ATOM | 365 | HD23 | LEU | A | 25 | -6.170  | -6.542 | -9.093 | 1.00 | 0.00 | H |
| ATOM | 366 | N    | CYS | A | 26 | -4.586  | -2.706 | -5.167 | 1.00 | 0.00 | N |

|      |     |      |     |   |    |        |        |         |      |      |   |
|------|-----|------|-----|---|----|--------|--------|---------|------|------|---|
| ATOM | 367 | CA   | CYS | A | 26 | -3.778 | -1.525 | -4.934  | 1.00 | 0.00 | C |
| ATOM | 368 | C    | CYS | A | 26 | -2.362 | -1.879 | -4.448  | 1.00 | 0.00 | C |
| ATOM | 369 | O    | CYS | A | 26 | -1.430 | -1.101 | -4.705  | 1.00 | 0.00 | O |
| ATOM | 370 | CB   | CYS | A | 26 | -4.476 | -0.525 | -4.018  | 1.00 | 0.00 | C |
| ATOM | 371 | SG   | CYS | A | 26 | -6.085 | 0.064  | -4.693  | 1.00 | 0.00 | S |
| ATOM | 372 | H    | CYS | A | 26 | -5.403 | -2.889 | -4.588  | 1.00 | 0.00 | H |
| ATOM | 373 | HA   | CYS | A | 26 | -3.600 | -1.034 | -5.903  | 1.00 | 0.00 | H |
| ATOM | 374 | HB1  | CYS | A | 26 | -4.736 | -0.972 | -3.044  | 1.00 | 0.00 | H |
| ATOM | 375 | HB2  | CYS | A | 26 | -3.822 | 0.334  | -3.824  | 1.00 | 0.00 | H |
| ATOM | 376 | N    | ALA | A | 27 | -2.219 | -3.038 | -3.789  | 1.00 | 0.00 | N |
| ATOM | 377 | CA   | ALA | A | 27 | -0.925 | -3.611 | -3.434  | 1.00 | 0.00 | C |
| ATOM | 378 | C    | ALA | A | 27 | -0.139 | -4.032 | -4.694  | 1.00 | 0.00 | C |
| ATOM | 379 | O    | ALA | A | 27 | 0.999  | -3.594 | -4.890  | 1.00 | 0.00 | O |
| ATOM | 380 | CB   | ALA | A | 27 | -1.113 | -4.769 | -2.453  | 1.00 | 0.00 | C |
| ATOM | 381 | H    | ALA | A | 27 | -3.059 | -3.550 | -3.521  | 1.00 | 0.00 | H |
| ATOM | 382 | HA   | ALA | A | 27 | -0.298 | -2.835 | -2.978  | 1.00 | 0.00 | H |
| ATOM | 383 | HB1  | ALA | A | 27 | -1.612 | -4.409 | -1.541  | 1.00 | 0.00 | H |
| ATOM | 384 | HB2  | ALA | A | 27 | -0.127 | -5.168 | -2.185  | 1.00 | 0.00 | H |
| ATOM | 385 | HB3  | ALA | A | 27 | -1.726 | -5.566 | -2.898  | 1.00 | 0.00 | H |
| ATOM | 386 | N    | THR | A | 28 | -0.739 | -4.891 | -5.549  | 1.00 | 0.00 | N |
| ATOM | 387 | CA   | THR | A | 28 | -0.010 | -5.367 | -6.720  | 1.00 | 0.00 | C |
| ATOM | 388 | C    | THR | A | 28 | 0.355  | -4.256 | -7.732  | 1.00 | 0.00 | C |
| ATOM | 389 | O    | THR | A | 28 | 1.386  | -4.351 | -8.390  | 1.00 | 0.00 | O |
| ATOM | 390 | CB   | THR | A | 28 | -0.727 | -6.523 | -7.428  | 1.00 | 0.00 | C |
| ATOM | 391 | OG1  | THR | A | 28 | -1.977 | -6.014 | -7.900  | 1.00 | 0.00 | O |
| ATOM | 392 | CG2  | THR | A | 28 | -0.912 | -7.765 | -6.556  | 1.00 | 0.00 | C |
| ATOM | 393 | H    | THR | A | 28 | -1.704 | -5.193 | -5.399  | 1.00 | 0.00 | H |
| ATOM | 394 | HA   | THR | A | 28 | 0.973  | -5.738 | -6.392  | 1.00 | 0.00 | H |
| ATOM | 395 | HB   | THR | A | 28 | -0.077 | -6.775 | -8.286  | 1.00 | 0.00 | H |
| ATOM | 396 | HG1  | THR | A | 28 | -2.363 | -6.673 | -8.498  | 1.00 | 0.00 | H |
| ATOM | 397 | HG21 | THR | A | 28 | 0.058  | -8.135 | -6.188  | 1.00 | 0.00 | H |
| ATOM | 398 | HG22 | THR | A | 28 | -1.373 | -8.574 | -7.147  | 1.00 | 0.00 | H |
| ATOM | 399 | HG23 | THR | A | 28 | -1.567 | -7.559 | -5.698  | 1.00 | 0.00 | H |
| ATOM | 400 | N    | TYR | A | 29 | -0.495 | -3.202 | -7.803  | 1.00 | 0.00 | N |
| ATOM | 401 | CA   | TYR | A | 29 | -0.228 | -2.054 | -8.659  | 1.00 | 0.00 | C |
| ATOM | 402 | C    | TYR | A | 29 | 1.059  | -1.300 | -8.268  | 1.00 | 0.00 | C |
| ATOM | 403 | O    | TYR | A | 29 | 1.664  | -0.629 | -9.097  | 1.00 | 0.00 | O |
| ATOM | 404 | CB   | TYR | A | 29 | -1.479 | -1.137 | -8.574  | 1.00 | 0.00 | C |
| ATOM | 405 | CG   | TYR | A | 29 | -1.366 | 0.294  | -9.052  | 1.00 | 0.00 | C |
| ATOM | 406 | CD1  | TYR | A | 29 | -0.742 | 0.664  | -10.249 | 1.00 | 0.00 | C |
| ATOM | 407 | CD2  | TYR | A | 29 | -1.907 | 1.318  | -8.262  | 1.00 | 0.00 | C |
| ATOM | 408 | CE1  | TYR | A | 29 | -0.629 | 2.003  | -10.622 | 1.00 | 0.00 | C |
| ATOM | 409 | CE2  | TYR | A | 29 | -1.811 | 2.661  | -8.619  | 1.00 | 0.00 | C |
| ATOM | 410 | CZ   | TYR | A | 29 | -1.148 | 3.008  | -9.800  | 1.00 | 0.00 | C |
| ATOM | 411 | OH   | TYR | A | 29 | -1.019 | 4.343  | -10.076 | 1.00 | 0.00 | O |
| ATOM | 412 | H    | TYR | A | 29 | -1.426 | -3.295 | -7.393  | 1.00 | 0.00 | H |
| ATOM | 413 | HA   | TYR | A | 29 | -0.054 | -2.381 | -9.696  | 1.00 | 0.00 | H |
| ATOM | 414 | HB1  | TYR | A | 29 | -2.293 | -1.658 | -9.106  | 1.00 | 0.00 | H |
| ATOM | 415 | HB2  | TYR | A | 29 | -1.788 | -1.116 | -7.520  | 1.00 | 0.00 | H |
| ATOM | 416 | HD1  | TYR | A | 29 | -0.295 | -0.096 | -10.889 | 1.00 | 0.00 | H |
| ATOM | 417 | HD2  | TYR | A | 29 | -2.399 | 1.058  | -7.322  | 1.00 | 0.00 | H |
| ATOM | 418 | HE1  | TYR | A | 29 | -0.114 | 2.269  | -11.551 | 1.00 | 0.00 | H |
| ATOM | 419 | HE2  | TYR | A | 29 | -2.211 | 3.448  | -7.980  | 1.00 | 0.00 | H |
| ATOM | 420 | HH   | TYR | A | 29 | -0.521 | 4.451  | -10.901 | 1.00 | 0.00 | H |
| ATOM | 421 | N    | THR | A | 30 | 1.415  | -1.371 | -6.954  | 1.00 | 0.00 | N |
| ATOM | 422 | CA   | THR | A | 30 | 2.351  | -0.433 | -6.371  | 1.00 | 0.00 | C |
| ATOM | 423 | C    | THR | A | 30 | 3.598  | -1.036 | -5.723  | 1.00 | 0.00 | C |
| ATOM | 424 | O    | THR | A | 30 | 4.501  | -0.298 | -5.324  | 1.00 | 0.00 | O |
| ATOM | 425 | CB   | THR | A | 30 | 1.632  | 0.432  | -5.308  | 1.00 | 0.00 | C |
| ATOM | 426 | OG1  | THR | A | 30 | 1.204  | -0.402 | -4.224  | 1.00 | 0.00 | O |
| ATOM | 427 | CG2  | THR | A | 30 | 0.476  | 1.211  | -5.909  | 1.00 | 0.00 | C |
| ATOM | 428 | H    | THR | A | 30 | 0.845  | -1.936 | -6.329  | 1.00 | 0.00 | H |
| ATOM | 429 | HA   | THR | A | 30 | 2.706  | 0.211  | -7.187  | 1.00 | 0.00 | H |



|      |     |      |     |   |    |        |        |        |      |      |   |
|------|-----|------|-----|---|----|--------|--------|--------|------|------|---|
| ATOM | 430 | HB   | THR | A | 30 | 2.373  | 1.123  | -4.883 | 1.00 | 0.00 | H |
| ATOM | 431 | HG1  | THR | A | 30 | 0.286  | -0.712 | -4.393 | 1.00 | 0.00 | H |
| ATOM | 432 | HG21 | THR | A | 30 | 0.780  | 1.713  | -6.837 | 1.00 | 0.00 | H |
| ATOM | 433 | HG22 | THR | A | 30 | 0.119  | 1.966  | -5.205 | 1.00 | 0.00 | H |
| ATOM | 434 | HG23 | THR | A | 30 | -0.356 | 0.544  | -6.156 | 1.00 | 0.00 | H |
| ATOM | 435 | N    | GLY | A | 31 | 3.605  | -2.380 | -5.539 | 1.00 | 0.00 | N |
| ATOM | 436 | CA   | GLY | A | 31 | 4.569  | -2.985 | -4.655 | 1.00 | 0.00 | C |
| ATOM | 437 | C    | GLY | A | 31 | 4.290  | -2.809 | -3.163 | 1.00 | 0.00 | C |
| ATOM | 438 | O    | GLY | A | 31 | 5.093  | -3.257 | -2.329 | 1.00 | 0.00 | O |
| ATOM | 439 | H    | GLY | A | 31 | 2.781  | -2.919 | -5.797 | 1.00 | 0.00 | H |
| ATOM | 440 | HA1  | GLY | A | 31 | 4.612  | -4.067 | -4.840 | 1.00 | 0.00 | H |
| ATOM | 441 | HA2  | GLY | A | 31 | 5.569  | -2.569 | -4.844 | 1.00 | 0.00 | H |
| ATOM | 442 | N    | CYS | A | 32 | 3.163  | -2.171 | -2.801 | 1.00 | 0.00 | N |
| ATOM | 443 | CA   | CYS | A | 32 | 2.723  | -2.212 | -1.424 | 1.00 | 0.00 | C |
| ATOM | 444 | C    | CYS | A | 32 | 2.300  | -3.669 | -1.071 | 1.00 | 0.00 | C |
| ATOM | 445 | O    | CYS | A | 32 | 1.984  | -4.475 | -1.943 | 1.00 | 0.00 | O |
| ATOM | 446 | CB   | CYS | A | 32 | 1.567  | -1.240 | -1.157 | 1.00 | 0.00 | C |
| ATOM | 447 | SG   | CYS | A | 32 | 1.910  | 0.538  | -1.547 | 1.00 | 0.00 | S |
| ATOM | 448 | H    | CYS | A | 32 | 2.478  | -1.916 | -3.514 | 1.00 | 0.00 | H |
| ATOM | 449 | HA   | CYS | A | 32 | 3.562  | -1.943 | -0.773 | 1.00 | 0.00 | H |
| ATOM | 450 | HB1  | CYS | A | 32 | 0.693  | -1.494 | -1.773 | 1.00 | 0.00 | H |
| ATOM | 451 | HB2  | CYS | A | 32 | 1.274  | -1.298 | -0.102 | 1.00 | 0.00 | H |
| ATOM | 452 | N    | ILE | A | 33 | 2.313  | -3.957 | 0.252  | 1.00 | 0.00 | N |
| ATOM | 453 | CA   | ILE | A | 33 | 1.980  | -5.270 | 0.747  | 1.00 | 0.00 | C |
| ATOM | 454 | C    | ILE | A | 33 | 0.868  | -5.165 | 1.796  | 1.00 | 0.00 | C |
| ATOM | 455 | O    | ILE | A | 33 | 0.483  | -4.087 | 2.269  | 1.00 | 0.00 | O |
| ATOM | 456 | CB   | ILE | A | 33 | 3.224  | -6.052 | 1.276  | 1.00 | 0.00 | C |
| ATOM | 457 | CG1  | ILE | A | 33 | 3.823  | -5.350 | 2.510  | 1.00 | 0.00 | C |
| ATOM | 458 | CG2  | ILE | A | 33 | 4.214  | -6.293 | 0.130  | 1.00 | 0.00 | C |
| ATOM | 459 | CD1  | ILE | A | 33 | 5.067  | -6.007 | 3.106  | 1.00 | 0.00 | C |
| ATOM | 460 | H    | ILE | A | 33 | 2.566  | -3.222 | 0.917  | 1.00 | 0.00 | H |
| ATOM | 461 | HA   | ILE | A | 33 | 1.574  | -5.825 | -0.112 | 1.00 | 0.00 | H |
| ATOM | 462 | HB   | ILE | A | 33 | 2.860  | -7.045 | 1.605  | 1.00 | 0.00 | H |
| ATOM | 463 | HG11 | ILE | A | 33 | 4.072  | -4.313 | 2.246  | 1.00 | 0.00 | H |
| ATOM | 464 | HG12 | ILE | A | 33 | 3.037  | -5.291 | 3.285  | 1.00 | 0.00 | H |
| ATOM | 465 | HG21 | ILE | A | 33 | 5.068  | -6.898 | 0.462  | 1.00 | 0.00 | H |
| ATOM | 466 | HG22 | ILE | A | 33 | 4.613  | -5.356 | -0.276 | 1.00 | 0.00 | H |
| ATOM | 467 | HG23 | ILE | A | 33 | 3.723  | -6.827 | -0.699 | 1.00 | 0.00 | H |
| ATOM | 468 | HD11 | ILE | A | 33 | 4.898  | -7.075 | 3.328  | 1.00 | 0.00 | H |
| ATOM | 469 | HD12 | ILE | A | 33 | 5.353  | -5.510 | 4.045  | 1.00 | 0.00 | H |
| ATOM | 470 | HD13 | ILE | A | 33 | 5.932  | -5.926 | 2.433  | 1.00 | 0.00 | H |
| ATOM | 471 | N    | ILE | A | 34 | 0.326  | -6.348 | 2.165  | 1.00 | 0.00 | N |
| ATOM | 472 | CA   | ILE | A | 34 | -0.724 | -6.479 | 3.161  | 1.00 | 0.00 | C |
| ATOM | 473 | C    | ILE | A | 34 | -0.215 | -7.497 | 4.185  | 1.00 | 0.00 | C |
| ATOM | 474 | O    | ILE | A | 34 | 0.159  | -8.614 | 3.826  | 1.00 | 0.00 | O |
| ATOM | 475 | CB   | ILE | A | 34 | -2.082 | -6.919 | 2.553  | 1.00 | 0.00 | C |
| ATOM | 476 | CG1  | ILE | A | 34 | -2.408 | -6.085 | 1.300  | 1.00 | 0.00 | C |
| ATOM | 477 | CG2  | ILE | A | 34 | -3.172 | -6.838 | 3.632  | 1.00 | 0.00 | C |
| ATOM | 478 | CD1  | ILE | A | 34 | -3.715 | -6.446 | 0.597  | 1.00 | 0.00 | C |
| ATOM | 479 | H    | ILE | A | 34 | 0.702  | -7.213 | 1.787  | 1.00 | 0.00 | H |
| ATOM | 480 | HA   | ILE | A | 34 | -0.838 | -5.494 | 3.625  | 1.00 | 0.00 | H |
| ATOM | 481 | HB   | ILE | A | 34 | -1.973 | -7.976 | 2.248  | 1.00 | 0.00 | H |
| ATOM | 482 | HG11 | ILE | A | 34 | -2.414 | -5.015 | 1.568  | 1.00 | 0.00 | H |
| ATOM | 483 | HG12 | ILE | A | 34 | -1.584 | -6.199 | 0.578  | 1.00 | 0.00 | H |
| ATOM | 484 | HG21 | ILE | A | 34 | -2.889 | -7.396 | 4.538  | 1.00 | 0.00 | H |
| ATOM | 485 | HG22 | ILE | A | 34 | -4.125 | -7.257 | 3.278  | 1.00 | 0.00 | H |
| ATOM | 486 | HG23 | ILE | A | 34 | -3.350 | -5.792 | 3.934  | 1.00 | 0.00 | H |
| ATOM | 487 | HD11 | ILE | A | 34 | -3.725 | -7.504 | 0.281  | 1.00 | 0.00 | H |
| ATOM | 488 | HD12 | ILE | A | 34 | -3.838 | -5.822 | -0.298 | 1.00 | 0.00 | H |
| ATOM | 489 | HD13 | ILE | A | 34 | -4.596 | -6.283 | 1.235  | 1.00 | 0.00 | H |
| ATOM | 490 | N    | ILE | A | 35 | -0.187 | -7.066 | 5.472  | 1.00 | 0.00 | N |
| ATOM | 491 | CA   | ILE | A | 35 | 0.406  | -7.876 | 6.511  | 1.00 | 0.00 | C |
| ATOM | 492 | C    | ILE | A | 35 | -0.486 | -7.896 | 7.748  | 1.00 | 0.00 | C |

|      |     |      |     |   |    |        |         |        |      |      |   |
|------|-----|------|-----|---|----|--------|---------|--------|------|------|---|
| ATOM | 493 | O    | ILE | A | 35 | -1.280 | -6.979  | 8.016  | 1.00 | 0.00 | O |
| ATOM | 494 | CB   | ILE | A | 35 | 1.849  | -7.408  | 6.903  | 1.00 | 0.00 | C |
| ATOM | 495 | CG1  | ILE | A | 35 | 1.857  | -6.057  | 7.644  | 1.00 | 0.00 | C |
| ATOM | 496 | CG2  | ILE | A | 35 | 2.769  | -7.422  | 5.676  | 1.00 | 0.00 | C |
| ATOM | 497 | CD1  | ILE | A | 35 | 3.196  | -5.713  | 8.298  | 1.00 | 0.00 | C |
| ATOM | 498 | H    | ILE | A | 35 | -0.505 | -6.121  | 5.685  | 1.00 | 0.00 | H |
| ATOM | 499 | HA   | ILE | A | 35 | 0.482  | -8.886  | 6.084  | 1.00 | 0.00 | H |
| ATOM | 500 | HB   | ILE | A | 35 | 2.233  | -8.173  | 7.606  | 1.00 | 0.00 | H |
| ATOM | 501 | HG11 | ILE | A | 35 | 1.572  | -5.254  | 6.943  | 1.00 | 0.00 | H |
| ATOM | 502 | HG12 | ILE | A | 35 | 1.085  | -6.050  | 8.429  | 1.00 | 0.00 | H |
| ATOM | 503 | HG21 | ILE | A | 35 | 3.811  | -7.220  | 5.962  | 1.00 | 0.00 | H |
| ATOM | 504 | HG22 | ILE | A | 35 | 2.474  | -6.650  | 4.951  | 1.00 | 0.00 | H |
| ATOM | 505 | HG23 | ILE | A | 35 | 2.740  | -8.390  | 5.155  | 1.00 | 0.00 | H |
| ATOM | 506 | HD11 | ILE | A | 35 | 3.575  | -6.556  | 8.906  | 1.00 | 0.00 | H |
| ATOM | 507 | HD12 | ILE | A | 35 | 3.095  | -4.854  | 8.972  | 1.00 | 0.00 | H |
| ATOM | 508 | HD13 | ILE | A | 35 | 3.973  | -5.474  | 7.557  | 1.00 | 0.00 | H |
| ATOM | 509 | N    | PRO | A | 36 | -0.298 | -8.914  | 8.627  | 1.00 | 0.00 | N |
| ATOM | 510 | CA   | PRO | A | 36 | -0.998 | -8.907  | 9.922  | 1.00 | 0.00 | C |
| ATOM | 511 | C    | PRO | A | 36 | -0.332 | -8.000  | 10.966 | 1.00 | 0.00 | C |
| ATOM | 512 | O    | PRO | A | 36 | -0.944 | -7.655  | 11.972 | 1.00 | 0.00 | O |
| ATOM | 513 | CB   | PRO | A | 36 | -0.967 | -10.386 | 10.353 | 1.00 | 0.00 | C |
| ATOM | 514 | CG   | PRO | A | 36 | 0.326  | -10.914 | 9.719  | 1.00 | 0.00 | C |
| ATOM | 515 | CD   | PRO | A | 36 | 0.371  | -10.209 | 8.359  | 1.00 | 0.00 | C |
| ATOM | 516 | HA   | PRO | A | 36 | -2.018 | -8.525  | 9.805  | 1.00 | 0.00 | H |
| ATOM | 517 | HB1  | PRO | A | 36 | -1.005 | -10.492 | 11.445 | 1.00 | 0.00 | H |
| ATOM | 518 | HB2  | PRO | A | 36 | -1.845 | -10.903 | 9.934  | 1.00 | 0.00 | H |
| ATOM | 519 | HG1  | PRO | A | 36 | 1.196  | -10.619 | 10.326 | 1.00 | 0.00 | H |
| ATOM | 520 | HG2  | PRO | A | 36 | 0.346  | -12.007 | 9.616  | 1.00 | 0.00 | H |
| ATOM | 521 | HD1  | PRO | A | 36 | 1.396  | -10.067 | 7.993  | 1.00 | 0.00 | H |
| ATOM | 522 | HD2  | PRO | A | 36 | -0.191 | -10.767 | 7.592  | 1.00 | 0.00 | H |
| ATOM | 523 | N    | GLY | A | 37 | 0.973  | -7.662  | 10.759 | 1.00 | 0.00 | N |
| ATOM | 524 | CA   | GLY | A | 37 | 1.624  | -6.747  | 11.673 | 1.00 | 0.00 | C |
| ATOM | 525 | C    | GLY | A | 37 | 0.919  | -5.393  | 11.714 | 1.00 | 0.00 | C |
| ATOM | 526 | O    | GLY | A | 37 | 0.728  | -4.762  | 10.669 | 1.00 | 0.00 | O |
| ATOM | 527 | H    | GLY | A | 37 | 1.379  | -7.807  | 9.844  | 1.00 | 0.00 | H |
| ATOM | 528 | HA1  | GLY | A | 37 | 1.678  | -7.193  | 12.678 | 1.00 | 0.00 | H |
| ATOM | 529 | HA2  | GLY | A | 37 | 2.646  | -6.552  | 11.321 | 1.00 | 0.00 | H |
| ATOM | 530 | N    | ALA | A | 38 | 0.586  | -4.922  | 12.935 | 1.00 | 0.00 | N |
| ATOM | 531 | CA   | ALA | A | 38 | -0.016 | -3.601  | 13.129 | 1.00 | 0.00 | C |
| ATOM | 532 | C    | ALA | A | 38 | 0.972  | -2.470  | 12.764 | 1.00 | 0.00 | C |
| ATOM | 533 | O    | ALA | A | 38 | 0.564  | -1.415  | 12.305 | 1.00 | 0.00 | O |
| ATOM | 534 | CB   | ALA | A | 38 | -0.498 | -3.445  | 14.571 | 1.00 | 0.00 | C |
| ATOM | 535 | H    | ALA | A | 38 | 0.563  | -5.587  | 13.702 | 1.00 | 0.00 | H |
| ATOM | 536 | HA   | ALA | A | 38 | -0.866 | -3.474  | 12.443 | 1.00 | 0.00 | H |
| ATOM | 537 | HB1  | ALA | A | 38 | -1.276 | -4.186  | 14.809 | 1.00 | 0.00 | H |
| ATOM | 538 | HB2  | ALA | A | 38 | -0.926 | -2.442  | 14.704 | 1.00 | 0.00 | H |
| ATOM | 539 | HB3  | ALA | A | 38 | 0.334  | -3.560  | 15.284 | 1.00 | 0.00 | H |
| ATOM | 540 | N    | THR | A | 39 | 2.277  | -2.730  | 13.098 | 1.00 | 0.00 | N |
| ATOM | 541 | CA   | THR | A | 39 | 3.371  | -1.925  | 12.570 | 1.00 | 0.00 | C |
| ATOM | 542 | C    | THR | A | 39 | 3.934  | -2.645  | 11.333 | 1.00 | 0.00 | C |
| ATOM | 543 | O    | THR | A | 39 | 3.895  | -3.877  | 11.251 | 1.00 | 0.00 | O |
| ATOM | 544 | CB   | THR | A | 39 | 4.439  | -1.731  | 13.681 | 1.00 | 0.00 | C |
| ATOM | 545 | OG1  | THR | A | 39 | 3.816  | -1.197  | 14.836 | 1.00 | 0.00 | O |
| ATOM | 546 | CG2  | THR | A | 39 | 5.567  | -0.789  | 13.295 | 1.00 | 0.00 | C |
| ATOM | 547 | H    | THR | A | 39 | 2.514  | -3.718  | 13.162 | 1.00 | 0.00 | H |
| ATOM | 548 | HA   | THR | A | 39 | 2.951  | -0.946  | 12.300 | 1.00 | 0.00 | H |
| ATOM | 549 | HB   | THR | A | 39 | 4.864  | -2.736  | 13.899 | 1.00 | 0.00 | H |
| ATOM | 550 | HG1  | THR | A | 39 | 2.995  | -1.701  | 14.967 | 1.00 | 0.00 | H |
| ATOM | 551 | HG21 | THR | A | 39 | 6.169  | -1.167  | 12.456 | 1.00 | 0.00 | H |
| ATOM | 552 | HG22 | THR | A | 39 | 6.229  | -0.651  | 14.162 | 1.00 | 0.00 | H |
| ATOM | 553 | HG23 | THR | A | 39 | 5.164  | 0.202   | 13.028 | 1.00 | 0.00 | H |
| ATOM | 554 | N    | CYS | A | 40 | 4.444  | -1.827  | 10.390 | 1.00 | 0.00 | N |
| ATOM | 555 | CA   | CYS | A | 40 | 5.172  | -2.275  | 9.216  | 1.00 | 0.00 | C |

|      |     |     |     |   |    |        |        |        |      |      |   |
|------|-----|-----|-----|---|----|--------|--------|--------|------|------|---|
| ATOM | 556 | C   | CYS | A | 40 | 6.683  | -2.321 | 9.538  | 1.00 | 0.00 | C |
| ATOM | 557 | O   | CYS | A | 40 | 7.162  | -1.470 | 10.295 | 1.00 | 0.00 | O |
| ATOM | 558 | CB  | CYS | A | 40 | 4.959  | -1.280 | 8.067  | 1.00 | 0.00 | C |
| ATOM | 559 | SG  | CYS | A | 40 | 3.207  | -1.024 | 7.567  | 1.00 | 0.00 | S |
| ATOM | 560 | H   | CYS | A | 40 | 4.559  | -0.849 | 10.636 | 1.00 | 0.00 | H |
| ATOM | 561 | HA  | CYS | A | 40 | 4.785  | -3.264 | 8.948  | 1.00 | 0.00 | H |
| ATOM | 562 | HB1 | CYS | A | 40 | 5.303  | -0.279 | 8.377  | 1.00 | 0.00 | H |
| ATOM | 563 | HB2 | CYS | A | 40 | 5.552  | -1.535 | 7.181  | 1.00 | 0.00 | H |
| ATOM | 564 | N   | PRO | A | 41 | 7.432  | -3.276 | 8.943  | 1.00 | 0.00 | N |
| ATOM | 565 | CA  | PRO | A | 41 | 8.892  | -3.223 | 9.066  | 1.00 | 0.00 | C |
| ATOM | 566 | C   | PRO | A | 41 | 9.392  | -1.983 | 8.298  | 1.00 | 0.00 | C |
| ATOM | 567 | O   | PRO | A | 41 | 8.691  | -1.455 | 7.431  | 1.00 | 0.00 | O |
| ATOM | 568 | CB  | PRO | A | 41 | 9.351  | -4.569 | 8.478  | 1.00 | 0.00 | C |
| ATOM | 569 | CG  | PRO | A | 41 | 8.296  | -4.872 | 7.405  | 1.00 | 0.00 | C |
| ATOM | 570 | CD  | PRO | A | 41 | 6.989  | -4.262 | 7.937  | 1.00 | 0.00 | C |
| ATOM | 571 | HA  | PRO | A | 41 | 9.165  | -3.107 | 10.125 | 1.00 | 0.00 | H |
| ATOM | 572 | HB1 | PRO | A | 41 | 10.351 | -4.511 | 8.023  | 1.00 | 0.00 | H |
| ATOM | 573 | HB2 | PRO | A | 41 | 9.340  | -5.323 | 9.283  | 1.00 | 0.00 | H |
| ATOM | 574 | HG1 | PRO | A | 41 | 8.613  | -4.422 | 6.454  | 1.00 | 0.00 | H |
| ATOM | 575 | HG2 | PRO | A | 41 | 8.194  | -5.950 | 7.215  | 1.00 | 0.00 | H |
| ATOM | 576 | HD1 | PRO | A | 41 | 6.409  | -3.777 | 7.137  | 1.00 | 0.00 | H |
| ATOM | 577 | HD2 | PRO | A | 41 | 6.345  | -5.013 | 8.423  | 1.00 | 0.00 | H |
| ATOM | 578 | N   | GLY | A | 42 | 10.598 | -1.484 | 8.650  | 1.00 | 0.00 | N |
| ATOM | 579 | CA  | GLY | A | 42 | 11.088 | -0.201 | 8.155  | 1.00 | 0.00 | C |
| ATOM | 580 | C   | GLY | A | 42 | 11.163 | -0.050 | 6.621  | 1.00 | 0.00 | C |
| ATOM | 581 | O   | GLY | A | 42 | 10.791 | 1.002  | 6.088  | 1.00 | 0.00 | O |
| ATOM | 582 | H   | GLY | A | 42 | 11.166 | -2.005 | 9.306  | 1.00 | 0.00 | H |
| ATOM | 583 | HA1 | GLY | A | 42 | 10.447 | 0.615  | 8.512  | 1.00 | 0.00 | H |
| ATOM | 584 | HA2 | GLY | A | 42 | 12.094 | -0.052 | 8.573  | 1.00 | 0.00 | H |
| ATOM | 585 | N   | ASP | A | 43 | 11.659 | -1.118 | 5.977  | 1.00 | 0.00 | N |
| ATOM | 586 | CA  | ASP | A | 43 | 11.635 | -1.319 | 4.528  | 1.00 | 0.00 | C |
| ATOM | 587 | C   | ASP | A | 43 | 10.282 | -0.999 | 3.862  | 1.00 | 0.00 | C |
| ATOM | 588 | O   | ASP | A | 43 | 10.216 | -0.620 | 2.695  | 1.00 | 0.00 | O |
| ATOM | 589 | CB  | ASP | A | 43 | 11.973 | -2.815 | 4.262  | 1.00 | 0.00 | C |
| ATOM | 590 | CG  | ASP | A | 43 | 11.174 | -3.755 | 5.211  | 1.00 | 0.00 | C |
| ATOM | 591 | OD2 | ASP | A | 43 | 11.526 | -3.683 | 6.440  | 1.00 | 0.00 | O |
| ATOM | 592 | OD1 | ASP | A | 43 | 10.247 | -4.446 | 4.743  | 1.00 | 0.00 | O |
| ATOM | 593 | H   | ASP | A | 43 | 11.768 | -2.030 | 6.485  | 1.00 | 0.00 | H |
| ATOM | 594 | HA  | ASP | A | 43 | 12.365 | -0.666 | 4.028  | 1.00 | 0.00 | H |
| ATOM | 595 | HB1 | ASP | A | 43 | 11.760 | -3.038 | 3.209  | 1.00 | 0.00 | H |
| ATOM | 596 | HB2 | ASP | A | 43 | 13.049 | -2.965 | 4.444  | 1.00 | 0.00 | H |
| ATOM | 597 | N   | TYR | A | 44 | 9.214  | -1.245 | 4.652  | 1.00 | 0.00 | N |
| ATOM | 598 | CA  | TYR | A | 44 | 7.839  | -1.181 | 4.240  | 1.00 | 0.00 | C |
| ATOM | 599 | C   | TYR | A | 44 | 7.037  | -0.202 | 5.110  | 1.00 | 0.00 | C |
| ATOM | 600 | O   | TYR | A | 44 | 5.804  | -0.302 | 5.224  | 1.00 | 0.00 | O |
| ATOM | 601 | CB  | TYR | A | 44 | 7.226  | -2.603 | 4.173  | 1.00 | 0.00 | C |
| ATOM | 602 | CG  | TYR | A | 44 | 7.249  | -3.155 | 2.771  | 1.00 | 0.00 | C |
| ATOM | 603 | CD2 | TYR | A | 44 | 8.321  | -3.910 | 2.271  | 1.00 | 0.00 | C |
| ATOM | 604 | CD1 | TYR | A | 44 | 6.196  | -2.853 | 1.904  | 1.00 | 0.00 | C |
| ATOM | 605 | CE2 | TYR | A | 44 | 8.330  | -4.337 | 0.942  | 1.00 | 0.00 | C |
| ATOM | 606 | CE1 | TYR | A | 44 | 6.181  | -3.298 | 0.587  | 1.00 | 0.00 | C |
| ATOM | 607 | CZ  | TYR | A | 44 | 7.266  | -4.029 | 0.082  | 1.00 | 0.00 | C |
| ATOM | 608 | OH  | TYR | A | 44 | 7.320  | -4.456 | -1.208 | 1.00 | 0.00 | O |
| ATOM | 609 | H   | TYR | A | 44 | 9.368  | -1.572 | 5.603  | 1.00 | 0.00 | H |
| ATOM | 610 | HA  | TYR | A | 44 | 7.823  | -0.734 | 3.236  | 1.00 | 0.00 | H |
| ATOM | 611 | HB1 | TYR | A | 44 | 7.798  | -3.250 | 4.851  | 1.00 | 0.00 | H |
| ATOM | 612 | HB2 | TYR | A | 44 | 6.194  | -2.564 | 4.538  | 1.00 | 0.00 | H |
| ATOM | 613 | HD2 | TYR | A | 44 | 9.149  | -4.167 | 2.939  | 1.00 | 0.00 | H |
| ATOM | 614 | HD1 | TYR | A | 44 | 5.352  | -2.270 | 2.267  | 1.00 | 0.00 | H |
| ATOM | 615 | HE2 | TYR | A | 44 | 9.168  | -4.918 | 0.550  | 1.00 | 0.00 | H |
| ATOM | 616 | HE1 | TYR | A | 44 | 5.330  | -3.100 | -0.058 | 1.00 | 0.00 | H |
| ATOM | 617 | HH  | TYR | A | 44 | 6.545  | -4.108 | -1.702 | 1.00 | 0.00 | H |
| ATOM | 618 | N   | ALA | A | 45 | 7.738  | 0.805  | 5.668  | 1.00 | 0.00 | N |

|      |     |      |     |   |    |       |       |       |      |      |   |
|------|-----|------|-----|---|----|-------|-------|-------|------|------|---|
| ATOM | 619 | CA   | ALA | A | 45 | 7.139 | 1.767 | 6.580 | 1.00 | 0.00 | C |
| ATOM | 620 | C    | ALA | A | 45 | 6.936 | 3.131 | 5.902 | 1.00 | 0.00 | C |
| ATOM | 621 | O    | ALA | A | 45 | 7.095 | 4.202 | 6.511 | 1.00 | 0.00 | O |
| ATOM | 622 | CB   | ALA | A | 45 | 7.905 | 1.873 | 7.893 | 1.00 | 0.00 | C |
| ATOM | 623 | H    | ALA | A | 45 | 8.759 | 0.799 | 5.597 | 1.00 | 0.00 | H |
| ATOM | 624 | HA   | ALA | A | 45 | 6.113 | 1.403 | 6.759 | 1.00 | 0.00 | H |
| ATOM | 625 | HB1  | ALA | A | 45 | 7.906 | 0.901 | 8.405 | 1.00 | 0.00 | H |
| ATOM | 626 | HB2  | ALA | A | 45 | 7.438 | 2.630 | 8.537 | 1.00 | 0.00 | H |
| ATOM | 627 | HB3  | ALA | A | 45 | 8.945 | 2.179 | 7.705 | 1.00 | 0.00 | H |
| ATOM | 628 | N    | ASN | A | 46 | 6.518 | 3.078 | 4.623 | 1.00 | 0.00 | N |
| ATOM | 629 | CA   | ASN | A | 46 | 5.803 | 4.167 | 3.994 | 1.00 | 0.00 | C |
| ATOM | 630 | C    | ASN | A | 46 | 4.359 | 3.720 | 3.637 | 1.00 | 0.00 | C |
| ATOM | 631 | OXT  | ASN | A | 46 | 3.955 | 2.618 | 4.107 | 1.00 | 0.00 | O |
| ATOM | 632 | CB   | ASN | A | 46 | 6.552 | 4.761 | 2.795 | 1.00 | 0.00 | C |
| ATOM | 633 | CG   | ASN | A | 46 | 7.847 | 5.520 | 3.063 | 1.00 | 0.00 | C |
| ATOM | 634 | OD1  | ASN | A | 46 | 8.496 | 6.006 | 2.111 | 1.00 | 0.00 | O |
| ATOM | 635 | ND2  | ASN | A | 46 | 8.252 | 5.688 | 4.330 | 1.00 | 0.00 | N |
| ATOM | 636 | O    | ASN | A | 46 | 3.682 | 4.523 | 2.939 | 1.00 | 0.00 | O |
| ATOM | 637 | H    | ASN | A | 46 | 6.406 | 2.173 | 4.170 | 1.00 | 0.00 | H |
| ATOM | 638 | HA   | ASN | A | 46 | 5.671 | 4.949 | 4.759 | 1.00 | 0.00 | H |
| ATOM | 639 | HB1  | ASN | A | 46 | 6.799 | 3.954 | 2.089 | 1.00 | 0.00 | H |
| ATOM | 640 | HB2  | ASN | A | 46 | 5.875 | 5.451 | 2.271 | 1.00 | 0.00 | H |
| ATOM | 641 | HD21 | ASN | A | 46 | 7.812 | 5.253 | 5.154 | 1.00 | 0.00 | H |
| ATOM | 642 | HD22 | ASN | A | 46 | 9.139 | 6.166 | 4.455 | 1.00 | 0.00 | H |
| END  |     |      |     |   |    |       |       |       |      |      |   |

## 2) CRAMBIN – molecule as in the optimized 0W crystal

| COMPND | CRAMBIN OPTIMIZED CRYSTAL 0W GEOMETRY         |      |     |   |   |        |        |        |      |      |   |
|--------|-----------------------------------------------|------|-----|---|---|--------|--------|--------|------|------|---|
| AUTHOR | DELLE PIANE, CORNO, ORLANDO, DOVESI, UGLIENGO |      |     |   |   |        |        |        |      |      |   |
| ATOM   | 1                                             | N    | THR | N | 1 | -7.130 | -5.367 | -3.415 | 1.00 | 0.00 | N |
| ATOM   | 2                                             | H1   | THR | N | 1 | -7.808 | -5.844 | -4.016 | 1.00 | 0.00 | H |
| ATOM   | 3                                             | H2   | THR | N | 1 | -7.455 | -5.409 | -2.434 | 1.00 | 0.00 | H |
| ATOM   | 4                                             | H3   | THR | N | 1 | -6.249 | -5.927 | -3.476 | 1.00 | 0.00 | H |
| ATOM   | 5                                             | CA   | THR | N | 1 | -6.943 | -3.934 | -3.779 | 1.00 | 0.00 | C |
| ATOM   | 6                                             | HA   | THR | N | 1 | -7.907 | -3.544 | -4.134 | 1.00 | 0.00 | H |
| ATOM   | 7                                             | C    | THR | N | 1 | -5.859 | -3.842 | -4.847 | 1.00 | 0.00 | C |
| ATOM   | 8                                             | CB   | THR | N | 1 | -6.480 | -3.169 | -2.492 | 1.00 | 0.00 | C |
| ATOM   | 9                                             | O    | THR | N | 1 | -4.905 | -4.641 | -4.820 | 1.00 | 0.00 | O |
| ATOM   | 10                                            | N    | THR | N | 2 | -5.980 | -2.809 | -5.680 | 1.00 | 0.00 | N |
| ATOM   | 11                                            | HB   | THR | N | 1 | -5.416 | -3.420 | -2.342 | 1.00 | 0.00 | H |
| ATOM   | 12                                            | OG1  | THR | N | 1 | -7.240 | -3.648 | -1.392 | 1.00 | 0.00 | O |
| ATOM   | 13                                            | CG2  | THR | N | 1 | -6.639 | -1.665 | -2.642 | 1.00 | 0.00 | C |
| ATOM   | 14                                            | H    | THR | N | 2 | -6.887 | -2.331 | -5.781 | 1.00 | 0.00 | H |
| ATOM   | 15                                            | CA   | THR | N | 2 | -4.922 | -2.459 | -6.603 | 1.00 | 0.00 | C |
| ATOM   | 16                                            | HG1  | THR | N | 1 | -6.662 | -4.306 | -0.939 | 1.00 | 0.00 | H |
| ATOM   | 17                                            | HG21 | THR | N | 1 | -6.323 | -1.179 | -1.708 | 1.00 | 0.00 | H |
| ATOM   | 18                                            | HG22 | THR | N | 1 | -6.018 | -1.275 | -3.461 | 1.00 | 0.00 | H |
| ATOM   | 19                                            | HG23 | THR | N | 1 | -7.693 | -1.400 | -2.825 | 1.00 | 0.00 | H |
| ATOM   | 20                                            | HA   | THR | N | 2 | -4.511 | -3.379 | -7.022 | 1.00 | 0.00 | H |
| ATOM   | 21                                            | C    | THR | N | 2 | -3.775 | -1.719 | -5.910 | 1.00 | 0.00 | C |
| ATOM   | 22                                            | CB   | THR | N | 2 | -5.496 | -1.627 | -7.782 | 1.00 | 0.00 | C |
| ATOM   | 23                                            | O    | THR | N | 2 | -3.948 | -0.892 | -5.009 | 1.00 | 0.00 | O |
| ATOM   | 24                                            | N    | CYS | N | 3 | -2.574 | -2.037 | -6.444 | 1.00 | 0.00 | N |
| ATOM   | 25                                            | HB   | THR | N | 2 | -4.637 | -1.175 | -8.308 | 1.00 | 0.00 | H |
| ATOM   | 26                                            | OG1  | THR | N | 2 | -6.278 | -0.558 | -7.265 | 1.00 | 0.00 | O |
| ATOM   | 27                                            | CG2  | THR | N | 2 | -6.217 | -2.562 | -8.755 | 1.00 | 0.00 | C |
| ATOM   | 28                                            | H    | CYS | N | 3 | -2.562 | -2.704 | -7.215 | 1.00 | 0.00 | H |

|      |    |      |     |   |    |        |        |         |      |      |   |
|------|----|------|-----|---|----|--------|--------|---------|------|------|---|
| ATOM | 29 | CA   | CYS | N | 3  | -1.309 | -1.392 | -6.145  | 1.00 | 0.00 | C |
| ATOM | 30 | HG1  | THR | N | 2  | -7.238 | -0.655 | -7.511  | 1.00 | 0.00 | H |
| ATOM | 31 | HG21 | THR | N | 2  | -6.835 | -2.012 | -9.466  | 1.00 | 0.00 | H |
| ATOM | 32 | HG22 | THR | N | 2  | -5.471 | -3.141 | -9.310  | 1.00 | 0.00 | H |
| ATOM | 33 | HG23 | THR | N | 2  | -6.866 | -3.258 | -8.211  | 1.00 | 0.00 | H |
| ATOM | 34 | HA   | CYS | N | 3  | -1.504 | -0.436 | -5.645  | 1.00 | 0.00 | H |
| ATOM | 35 | C    | CYS | N | 3  | -0.600 | -1.155 | -7.488  | 1.00 | 0.00 | C |
| ATOM | 36 | CB   | CYS | N | 3  | -0.392 | -2.240 | -5.247  | 1.00 | 0.00 | C |
| ATOM | 37 | O    | CYS | N | 3  | -0.759 | -1.963 | -8.421  | 1.00 | 0.00 | O |
| ATOM | 38 | N    | CYS | N | 4  | 0.201  | -0.082 | -7.559  | 1.00 | 0.00 | N |
| ATOM | 39 | HB1  | CYS | N | 3  | -0.198 | -3.216 | -5.713  | 1.00 | 0.00 | H |
| ATOM | 40 | HB2  | CYS | N | 3  | 0.582  | -1.746 | -5.106  | 1.00 | 0.00 | H |
| ATOM | 41 | SG   | CYS | N | 3  | -1.101 | -2.668 | -3.608  | 1.00 | 0.00 | S |
| ATOM | 42 | H    | CYS | N | 4  | 0.186  | 0.617  | -6.791  | 1.00 | 0.00 | H |
| ATOM | 43 | CA   | CYS | N | 4  | 0.708  | 0.360  | -8.843  | 1.00 | 0.00 | C |
| ATOM | 44 | SG   | CYS | N | 40 | -0.971 | -0.887 | -2.536  | 1.00 | 0.00 | S |
| ATOM | 45 | HA   | CYS | N | 4  | 0.448  | -0.422 | -9.561  | 1.00 | 0.00 | H |
| ATOM | 46 | C    | CYS | N | 4  | 2.226  | 0.537  | -8.829  | 1.00 | 0.00 | C |
| ATOM | 47 | CB   | CYS | N | 4  | 0.031  | 1.676  | -9.259  | 1.00 | 0.00 | C |
| ATOM | 48 | CB   | CYS | N | 40 | 0.807  | -0.801 | -2.025  | 1.00 | 0.00 | C |
| ATOM | 49 | O    | CYS | N | 4  | 2.817  | 1.042  | -7.866  | 1.00 | 0.00 | O |
| ATOM | 50 | N    | PRO | N | 5  | 2.882  | 0.167  | -9.952  | 1.00 | 0.00 | N |
| ATOM | 51 | HB1  | CYS | N | 4  | -0.017 | 2.359  | -8.399  | 1.00 | 0.00 | H |
| ATOM | 52 | HB2  | CYS | N | 4  | 0.574  | 2.187  | -10.065 | 1.00 | 0.00 | H |
| ATOM | 53 | SG   | CYS | N | 4  | -1.708 | 1.443  | -9.792  | 1.00 | 0.00 | S |
| ATOM | 54 | HB1  | CYS | N | 40 | 1.412  | -0.460 | -2.877  | 1.00 | 0.00 | H |
| ATOM | 55 | HB2  | CYS | N | 40 | 0.827  | -0.014 | -1.256  | 1.00 | 0.00 | H |
| ATOM | 56 | CA   | CYS | N | 40 | 1.374  | -2.122 | -1.511  | 1.00 | 0.00 | C |
| ATOM | 57 | CA   | PRO | N | 5  | 4.354  | 0.202  | -10.031 | 1.00 | 0.00 | C |
| ATOM | 58 | CD   | PRO | N | 5  | 2.271  | -0.355 | -11.196 | 1.00 | 0.00 | C |
| ATOM | 59 | SG   | CYS | N | 32 | -1.453 | 0.620  | -11.699 | 1.00 | 0.00 | S |
| ATOM | 60 | HA   | CYS | N | 40 | 1.253  | -2.866 | -2.301  | 1.00 | 0.00 | H |
| ATOM | 61 | N    | CYS | N | 40 | 0.669  | -2.650 | -0.346  | 1.00 | 0.00 | N |
| ATOM | 62 | C    | CYS | N | 40 | 2.857  | -1.973 | -1.129  | 1.00 | 0.00 | C |
| ATOM | 63 | HA   | PRO | N | 5  | 4.815  | -0.332 | -9.190  | 1.00 | 0.00 | H |
| ATOM | 64 | C    | PRO | N | 5  | 4.950  | 1.602  | -9.973  | 1.00 | 0.00 | C |
| ATOM | 65 | CB   | PRO | N | 5  | 4.653  | -0.496 | -11.378 | 1.00 | 0.00 | C |
| ATOM | 66 | HD1  | PRO | N | 5  | 1.381  | 0.216  | -11.481 | 1.00 | 0.00 | H |
| ATOM | 67 | HD2  | PRO | N | 5  | 1.990  | -1.408 | -11.067 | 1.00 | 0.00 | H |
| ATOM | 68 | CG   | PRO | N | 5  | 3.395  | -0.230 | -12.208 | 1.00 | 0.00 | C |
| ATOM | 69 | CB   | CYS | N | 32 | -1.841 | -1.187 | -11.524 | 1.00 | 0.00 | C |
| ATOM | 70 | H    | CYS | N | 40 | 0.318  | -2.006 | 0.355   | 1.00 | 0.00 | H |
| ATOM | 71 | C    | THR | N | 39 | 0.652  | -3.985 | -0.104  | 1.00 | 0.00 | C |
| ATOM | 72 | O    | CYS | N | 40 | 3.151  | -1.162 | -0.228  | 1.00 | 0.00 | O |
| ATOM | 73 | N    | PRO | N | 41 | 3.753  | -2.778 | -1.730  | 1.00 | 0.00 | N |
| ATOM | 74 | O    | PRO | N | 5  | 6.163  | 1.751  | -9.762  | 1.00 | 0.00 | O |
| ATOM | 75 | N    | SER | N | 6  | 4.143  | 2.647  | -10.207 | 1.00 | 0.00 | N |
| ATOM | 76 | HB1  | PRO | N | 5  | 5.567  | -0.120 | -11.851 | 1.00 | 0.00 | H |
| ATOM | 77 | HB2  | PRO | N | 5  | 4.783  | -1.573 | -11.197 | 1.00 | 0.00 | H |
| ATOM | 78 | HG1  | PRO | N | 5  | 3.281  | -0.902 | -13.061 | 1.00 | 0.00 | H |
| ATOM | 79 | HG2  | PRO | N | 5  | 3.417  | 0.789  | -12.609 | 1.00 | 0.00 | H |
| ATOM | 80 | HB1  | CYS | N | 32 | -2.260 | -1.321 | -10.520 | 1.00 | 0.00 | H |
| ATOM | 81 | HB2  | CYS | N | 32 | -2.649 | -1.360 | -12.245 | 1.00 | 0.00 | H |
| ATOM | 82 | CA   | CYS | N | 32 | -0.689 | -2.187 | -11.755 | 1.00 | 0.00 | C |
| ATOM | 83 | O    | THR | N | 39 | 1.141  | -4.805 | -0.882  | 1.00 | 0.00 | O |
| ATOM | 84 | CA   | THR | N | 39 | -0.068 | -4.441 | 1.179   | 1.00 | 0.00 | C |
| ATOM | 85 | CA   | PRO | N | 41 | 5.178  | -2.750 | -1.405  | 1.00 | 0.00 | C |
| ATOM | 86 | CD   | PRO | N | 41 | 3.530  | -3.848 | -2.724  | 1.00 | 0.00 | C |
| ATOM | 87 | H    | SER | N | 6  | 3.138  | 2.529  | -10.271 | 1.00 | 0.00 | H |
| ATOM | 88 | CA   | SER | N | 6  | 4.631  | 4.003  | -10.107 | 1.00 | 0.00 | C |
| ATOM | 89 | HA   | CYS | N | 32 | 0.069  | -2.035 | -10.976 | 1.00 | 0.00 | H |
| ATOM | 90 | N    | CYS | N | 32 | -0.075 | -2.031 | -13.053 | 1.00 | 0.00 | N |
| ATOM | 91 | C    | CYS | N | 32 | -1.152 | -3.666 | -11.558 | 1.00 | 0.00 | C |

|      |     |      |     |   |    |        |        |         |      |      |   |
|------|-----|------|-----|---|----|--------|--------|---------|------|------|---|
| ATOM | 92  | HA   | THR | N | 39 | -0.037 | -3.660 | 1.951   | 1.00 | 0.00 | H |
| ATOM | 93  | N    | THR | N | 39 | -1.480 | -4.619 | 0.851   | 1.00 | 0.00 | N |
| ATOM | 94  | CB   | THR | N | 39 | 0.581  | -5.736 | 1.730   | 1.00 | 0.00 | C |
| ATOM | 95  | HA   | PRO | N | 41 | 5.298  | -2.363 | -0.391  | 1.00 | 0.00 | H |
| ATOM | 96  | C    | PRO | N | 41 | 5.918  | -1.796 | -2.355  | 1.00 | 0.00 | C |
| ATOM | 97  | CB   | PRO | N | 41 | 5.638  | -4.227 | -1.546  | 1.00 | 0.00 | C |
| ATOM | 98  | HD1  | PRO | N | 41 | 2.489  | -4.173 | -2.725  | 1.00 | 0.00 | H |
| ATOM | 99  | HD2  | PRO | N | 41 | 3.809  | -3.460 | -3.712  | 1.00 | 0.00 | H |
| ATOM | 100 | CG   | PRO | N | 41 | 4.472  | -4.957 | -2.251  | 1.00 | 0.00 | C |
| ATOM | 101 | HA   | SER | N | 6  | 5.304  | 4.071  | -9.239  | 1.00 | 0.00 | H |
| ATOM | 102 | C    | SER | N | 6  | 3.436  | 4.920  | -9.895  | 1.00 | 0.00 | C |
| ATOM | 103 | CB   | SER | N | 6  | 5.383  | 4.440  | -11.368 | 1.00 | 0.00 | C |
| ATOM | 104 | H    | CYS | N | 32 | -0.671 | -1.687 | -13.806 | 1.00 | 0.00 | H |
| ATOM | 105 | C    | GLY | N | 31 | 1.054  | -2.707 | -13.384 | 1.00 | 0.00 | C |
| ATOM | 106 | O    | CYS | N | 32 | -0.995 | -4.508 | -12.449 | 1.00 | 0.00 | O |
| ATOM | 107 | N    | ILE | N | 33 | -1.688 | -3.928 | -10.350 | 1.00 | 0.00 | N |
| ATOM | 108 | H    | THR | N | 39 | -1.712 | -5.288 | 0.122   | 1.00 | 0.00 | H |
| ATOM | 109 | C    | ALA | N | 38 | -2.480 | -3.890 | 1.404   | 1.00 | 0.00 | C |
| ATOM | 110 | HB   | THR | N | 39 | 0.612  | -6.460 | 0.892   | 1.00 | 0.00 | H |
| ATOM | 111 | OG1  | THR | N | 39 | -0.133 | -6.261 | 2.823   | 1.00 | 0.00 | O |
| ATOM | 112 | CG2  | THR | N | 39 | 2.004  | -5.482 | 2.217   | 1.00 | 0.00 | C |
| ATOM | 113 | O    | PRO | N | 41 | 5.354  | -1.256 | -3.298  | 1.00 | 0.00 | O |
| ATOM | 114 | N    | GLY | N | 42 | 7.249  | -1.605 | -2.120  | 1.00 | 0.00 | N |
| ATOM | 115 | HB1  | PRO | N | 41 | 6.552  | -4.297 | -2.147  | 1.00 | 0.00 | H |
| ATOM | 116 | HB2  | PRO | N | 41 | 5.842  | -4.656 | -0.554  | 1.00 | 0.00 | H |
| ATOM | 117 | HG1  | PRO | N | 41 | 4.840  | -5.545 | -3.100  | 1.00 | 0.00 | H |
| ATOM | 118 | HG2  | PRO | N | 41 | 3.935  | -5.607 | -1.544  | 1.00 | 0.00 | H |
| ATOM | 119 | O    | SER | N | 6  | 2.271  | 4.543  | -10.077 | 1.00 | 0.00 | O |
| ATOM | 120 | N    | ILE | N | 7  | 3.757  | 6.199  | -9.604  | 1.00 | 0.00 | N |
| ATOM | 121 | HB1  | SER | N | 6  | 6.149  | 3.691  | -11.614 | 1.00 | 0.00 | H |
| ATOM | 122 | HB2  | SER | N | 6  | 5.907  | 5.392  | -11.172 | 1.00 | 0.00 | H |
| ATOM | 123 | OG   | SER | N | 6  | 4.451  | 4.590  | -12.428 | 1.00 | 0.00 | O |
| ATOM | 124 | O    | GLY | N | 31 | 1.793  | -3.244 | -12.553 | 1.00 | 0.00 | O |
| ATOM | 125 | CA   | GLY | N | 31 | 1.418  | -2.786 | -14.874 | 1.00 | 0.00 | C |
| ATOM | 126 | H    | ILE | N | 33 | -1.631 | -3.194 | -9.641  | 1.00 | 0.00 | H |
| ATOM | 127 | CA   | ILE | N | 33 | -1.881 | -5.273 | -9.835  | 1.00 | 0.00 | C |
| ATOM | 128 | O    | ALA | N | 38 | -2.290 | -3.044 | 2.280   | 1.00 | 0.00 | O |
| ATOM | 129 | CA   | ALA | N | 38 | -3.888 | -4.156 | 0.811   | 1.00 | 0.00 | C |
| ATOM | 130 | HG1  | THR | N | 39 | -1.105 | -6.218 | 2.685   | 1.00 | 0.00 | H |
| ATOM | 131 | HG21 | THR | N | 39 | 2.653  | -5.123 | 1.405   | 1.00 | 0.00 | H |
| ATOM | 132 | HG22 | THR | N | 39 | 2.424  | -6.419 | 2.611   | 1.00 | 0.00 | H |
| ATOM | 133 | HG23 | THR | N | 39 | 1.995  | -4.755 | 3.046   | 1.00 | 0.00 | H |
| ATOM | 134 | H    | GLY | N | 42 | 7.625  | -1.833 | -1.205  | 1.00 | 0.00 | H |
| ATOM | 135 | CA   | GLY | N | 42 | 7.982  | -0.608 | -2.887  | 1.00 | 0.00 | C |
| ATOM | 136 | H    | ILE | N | 7  | 4.673  | 6.357  | -9.198  | 1.00 | 0.00 | H |
| ATOM | 137 | CA   | ILE | N | 7  | 2.731  | 7.196  | -9.351  | 1.00 | 0.00 | C |
| ATOM | 138 | H    | SER | N | 6  | 4.889  | 5.157  | -13.109 | 1.00 | 0.00 | H |
| ATOM | 139 | HA1  | GLY | N | 31 | 1.443  | -3.857 | -15.121 | 1.00 | 0.00 | H |
| ATOM | 140 | HA2  | GLY | N | 31 | 2.435  | -2.384 | -14.982 | 1.00 | 0.00 | H |
| ATOM | 141 | N    | GLY | N | 31 | 0.529  | -2.105 | -15.786 | 1.00 | 0.00 | N |
| ATOM | 142 | HA   | ILE | N | 33 | -1.930 | -5.968 | -10.679 | 1.00 | 0.00 | H |
| ATOM | 143 | C    | ILE | N | 33 | -3.183 | -5.283 | -9.061  | 1.00 | 0.00 | C |
| ATOM | 144 | CB   | ILE | N | 33 | -0.685 | -5.738 | -8.913  | 1.00 | 0.00 | C |
| ATOM | 145 | HA   | ALA | N | 38 | -3.829 | -3.921 | -0.265  | 1.00 | 0.00 | H |
| ATOM | 146 | N    | ALA | N | 38 | -4.211 | -5.581 | 0.930   | 1.00 | 0.00 | N |
| ATOM | 147 | CB   | ALA | N | 38 | -4.948 | -3.268 | 1.461   | 1.00 | 0.00 | C |
| ATOM | 148 | HA1  | GLY | N | 42 | 8.991  | -0.532 | -2.460  | 1.00 | 0.00 | H |
| ATOM | 149 | HA2  | GLY | N | 42 | 7.517  | 0.387  | -2.803  | 1.00 | 0.00 | H |
| ATOM | 150 | C    | GLY | N | 42 | 8.113  | -0.876 | -4.392  | 1.00 | 0.00 | C |
| ATOM | 151 | HA   | ILE | N | 7  | 1.958  | 6.765  | -8.697  | 1.00 | 0.00 | H |
| ATOM | 152 | C    | ILE | N | 7  | 1.972  | 7.532  | -10.645 | 1.00 | 0.00 | C |
| ATOM | 153 | CB   | ILE | N | 7  | 3.348  | 8.430  | -8.646  | 1.00 | 0.00 | C |
| ATOM | 154 | H    | GLY | N | 31 | -0.318 | -2.594 | -16.068 | 1.00 | 0.00 | H |

|      |     |      |     |   |    |        |        |         |      |      |   |
|------|-----|------|-----|---|----|--------|--------|---------|------|------|---|
| ATOM | 155 | C    | THR | N | 30 | 0.613  | -0.760 | -15.949 | 1.00 | 0.00 | C |
| ATOM | 156 | O    | ILE | N | 33 | -3.627 | -4.232 | -8.594  | 1.00 | 0.00 | O |
| ATOM | 157 | N    | ILE | N | 34 | -3.785 | -6.485 | -8.831  | 1.00 | 0.00 | N |
| ATOM | 158 | HB   | ILE | N | 33 | -0.644 | -6.837 | -9.014  | 1.00 | 0.00 | H |
| ATOM | 159 | CG2  | ILE | N | 33 | 0.616  | -5.147 | -9.456  | 1.00 | 0.00 | C |
| ATOM | 160 | CG1  | ILE | N | 33 | -0.889 | -5.388 | -7.422  | 1.00 | 0.00 | C |
| ATOM | 161 | H    | ALA | N | 38 | -3.827 | -6.047 | 1.775   | 1.00 | 0.00 | H |
| ATOM | 162 | C    | GLY | N | 37 | -5.087 | -6.214 | 0.137   | 1.00 | 0.00 | C |
| ATOM | 163 | HB1  | ALA | N | 38 | -5.903 | -3.360 | 0.929   | 1.00 | 0.00 | H |
| ATOM | 164 | HB2  | ALA | N | 38 | -4.634 | -2.216 | 1.435   | 1.00 | 0.00 | H |
| ATOM | 165 | HB3  | ALA | N | 38 | -5.097 | -3.557 | 2.510   | 1.00 | 0.00 | H |
| ATOM | 166 | O    | GLY | N | 42 | 8.383  | 0.061  | -5.149  | 1.00 | 0.00 | O |
| ATOM | 167 | N    | ASP | N | 43 | 7.967  | -2.155 | -4.800  | 1.00 | 0.00 | N |
| ATOM | 168 | O    | ILE | N | 7  | 0.745  | 7.671  | -10.617 | 1.00 | 0.00 | O |
| ATOM | 169 | N    | VAL | N | 8  | 2.697  | 7.684  | -11.780 | 1.00 | 0.00 | N |
| ATOM | 170 | HB   | ILE | N | 7  | 4.268  | 8.706  | -9.198  | 1.00 | 0.00 | H |
| ATOM | 171 | CG2  | ILE | N | 7  | 2.390  | 9.608  | -8.723  | 1.00 | 0.00 | C |
| ATOM | 172 | CG1  | ILE | N | 7  | 3.724  | 8.058  | -7.194  | 1.00 | 0.00 | C |
| ATOM | 173 | O    | THR | N | 30 | 1.553  | -0.091 | -15.517 | 1.00 | 0.00 | O |
| ATOM | 174 | CA   | THR | N | 30 | -0.585 | -0.046 | -16.594 | 1.00 | 0.00 | C |
| ATOM | 175 | H    | ILE | N | 34 | -3.277 | -7.325 | -9.101  | 1.00 | 0.00 | H |
| ATOM | 176 | CA   | ILE | N | 34 | -4.654 | -6.626 | -7.659  | 1.00 | 0.00 | C |
| ATOM | 177 | HG21 | ILE | N | 33 | 1.478  | -5.520 | -8.906  | 1.00 | 0.00 | H |
| ATOM | 178 | HG22 | ILE | N | 33 | 0.624  | -4.057 | -9.342  | 1.00 | 0.00 | H |
| ATOM | 179 | HG23 | ILE | N | 33 | 0.775  | -5.380 | -10.517 | 1.00 | 0.00 | H |
| ATOM | 180 | HG11 | ILE | N | 33 | -1.048 | -4.304 | -7.340  | 1.00 | 0.00 | H |
| ATOM | 181 | HG12 | ILE | N | 33 | -1.810 | -5.861 | -7.047  | 1.00 | 0.00 | H |
| ATOM | 182 | CD1  | ILE | N | 33 | 0.257  | -5.796 | -6.492  | 1.00 | 0.00 | C |
| ATOM | 183 | O    | GLY | N | 37 | -5.619 | -5.695 | -0.864  | 1.00 | 0.00 | O |
| ATOM | 184 | CA   | GLY | N | 37 | -5.454 | -7.640 | 0.563   | 1.00 | 0.00 | C |
| ATOM | 185 | H    | ASP | N | 43 | 7.497  | -2.843 | -4.202  | 1.00 | 0.00 | H |
| ATOM | 186 | CA   | ASP | N | 43 | 7.834  | -2.479 | -6.217  | 1.00 | 0.00 | C |
| ATOM | 187 | H    | VAL | N | 8  | 3.676  | 7.407  | -11.772 | 1.00 | 0.00 | H |
| ATOM | 188 | CA   | VAL | N | 8  | 2.025  | 7.902  | -13.061 | 1.00 | 0.00 | C |
| ATOM | 189 | HG21 | ILE | N | 7  | 2.784  | 10.462 | -8.167  | 1.00 | 0.00 | H |
| ATOM | 190 | HG22 | ILE | N | 7  | 2.240  | 9.935  | -9.760  | 1.00 | 0.00 | H |
| ATOM | 191 | HG23 | ILE | N | 7  | 1.405  | 9.344  | -8.311  | 1.00 | 0.00 | H |
| ATOM | 192 | HG11 | ILE | N | 7  | 4.412  | 7.200  | -7.209  | 1.00 | 0.00 | H |
| ATOM | 193 | HG12 | ILE | N | 7  | 2.810  | 7.688  | -6.696  | 1.00 | 0.00 | H |
| ATOM | 194 | CD1  | ILE | N | 7  | 4.347  | 9.162  | -6.341  | 1.00 | 0.00 | C |
| ATOM | 195 | HA   | THR | N | 30 | -0.194 | 0.578  | -17.409 | 1.00 | 0.00 | H |
| ATOM | 196 | N    | THR | N | 30 | -1.623 | -0.895 | -17.154 | 1.00 | 0.00 | N |
| ATOM | 197 | CB   | THR | N | 30 | -1.198 | 0.852  | -15.491 | 1.00 | 0.00 | C |
| ATOM | 198 | HA   | ILE | N | 34 | -4.611 | -5.665 | -7.134  | 1.00 | 0.00 | H |
| ATOM | 199 | C    | ILE | N | 34 | -4.056 | -7.736 | -6.798  | 1.00 | 0.00 | C |
| ATOM | 200 | CB   | ILE | N | 34 | -6.152 | -6.983 | -7.917  | 1.00 | 0.00 | C |
| ATOM | 201 | HD11 | ILE | N | 33 | 0.479  | -6.871 | -6.564  | 1.00 | 0.00 | H |
| ATOM | 202 | HD12 | ILE | N | 33 | 1.188  | -5.254 | -6.714  | 1.00 | 0.00 | H |
| ATOM | 203 | HD13 | ILE | N | 33 | -0.004 | -5.589 | -5.442  | 1.00 | 0.00 | H |
| ATOM | 204 | HA1  | GLY | N | 37 | -4.762 | -8.010 | 1.329   | 1.00 | 0.00 | H |
| ATOM | 205 | HA2  | GLY | N | 37 | -6.467 | -7.590 | 0.988   | 1.00 | 0.00 | H |
| ATOM | 206 | N    | GLY | N | 37 | -5.479 | -8.554 | -0.552  | 1.00 | 0.00 | N |
| ATOM | 207 | HA   | ASP | N | 43 | 8.654  | -1.992 | -6.752  | 1.00 | 0.00 | H |
| ATOM | 208 | CB   | ASP | N | 43 | 7.921  | -4.003 | -6.415  | 1.00 | 0.00 | C |
| ATOM | 209 | C    | ASP | N | 43 | 6.546  | -1.863 | -6.812  | 1.00 | 0.00 | C |
| ATOM | 210 | HA   | VAL | N | 8  | 1.228  | 8.637  | -12.881 | 1.00 | 0.00 | H |
| ATOM | 211 | C    | VAL | N | 8  | 1.268  | 6.651  | -13.520 | 1.00 | 0.00 | C |
| ATOM | 212 | CB   | VAL | N | 8  | 2.985  | 8.471  | -14.134 | 1.00 | 0.00 | C |
| ATOM | 213 | HD11 | ILE | N | 7  | 5.286  | 9.557  | -6.753  | 1.00 | 0.00 | H |
| ATOM | 214 | HD12 | ILE | N | 7  | 3.668  | 10.015 | -6.194  | 1.00 | 0.00 | H |
| ATOM | 215 | HD13 | ILE | N | 7  | 4.586  | 8.770  | -5.340  | 1.00 | 0.00 | H |
| ATOM | 216 | H    | THR | N | 30 | -2.154 | -1.487 | -16.517 | 1.00 | 0.00 | H |
| ATOM | 217 | C    | TYR | N | 29 | -2.127 | -0.721 | -18.403 | 1.00 | 0.00 | C |

|      |     |      |     |   |    |        |         |         |      |      |   |
|------|-----|------|-----|---|----|--------|---------|---------|------|------|---|
| ATOM | 218 | HB   | THR | N | 30 | -0.368 | 1.395   | -15.022 | 1.00 | 0.00 | H |
| ATOM | 219 | OG1  | THR | N | 30 | -1.745 | 0.009   | -14.470 | 1.00 | 0.00 | O |
| ATOM | 220 | CG2  | THR | N | 30 | -2.224 | 1.840   | -16.020 | 1.00 | 0.00 | C |
| ATOM | 221 | O    | ILE | N | 34 | -3.739 | -8.824  | -7.301  | 1.00 | 0.00 | O |
| ATOM | 222 | N    | ILE | N | 35 | -3.943 | -7.452  | -5.487  | 1.00 | 0.00 | N |
| ATOM | 223 | HB   | ILE | N | 34 | -6.215 | -8.078  | -7.998  | 1.00 | 0.00 | H |
| ATOM | 224 | CG1  | ILE | N | 34 | -6.710 | -6.420  | -9.230  | 1.00 | 0.00 | C |
| ATOM | 225 | CG2  | ILE | N | 34 | -7.004 | -6.561  | -6.708  | 1.00 | 0.00 | C |
| ATOM | 226 | H    | GLY | N | 37 | -4.581 | -8.979  | -0.785  | 1.00 | 0.00 | H |
| ATOM | 227 | C    | PRO | N | 36 | -6.613 | -9.091  | -1.054  | 1.00 | 0.00 | C |
| ATOM | 228 | HB1  | ASP | N | 43 | 7.753  | -4.246  | -7.475  | 1.00 | 0.00 | H |
| ATOM | 229 | HB2  | ASP | N | 43 | 8.949  | -4.324  | -6.179  | 1.00 | 0.00 | H |
| ATOM | 230 | CG   | ASP | N | 43 | 6.973  | -4.902  | -5.565  | 1.00 | 0.00 | C |
| ATOM | 231 | O    | ASP | N | 43 | 6.593  | -1.032  | -7.742  | 1.00 | 0.00 | O |
| ATOM | 232 | N    | TYR | N | 44 | 5.403  | -2.274  | -6.247  | 1.00 | 0.00 | N |
| ATOM | 233 | O    | VAL | N | 8  | 0.183  | 6.784   | -14.100 | 1.00 | 0.00 | O |
| ATOM | 234 | N    | ALA | N | 9  | 1.784  | 5.436   | -13.248 | 1.00 | 0.00 | N |
| ATOM | 235 | HB   | VAL | N | 8  | 3.902  | 7.856   | -14.120 | 1.00 | 0.00 | H |
| ATOM | 236 | CG2  | VAL | N | 8  | 3.359  | 9.912   | -13.752 | 1.00 | 0.00 | C |
| ATOM | 237 | CG1  | VAL | N | 8  | 2.380  | 8.390   | -15.544 | 1.00 | 0.00 | C |
| ATOM | 238 | O    | TYR | N | 29 | -1.618 | 0.007   | -19.257 | 1.00 | 0.00 | O |
| ATOM | 239 | CA   | TYR | N | 29 | -3.448 | -1.446  | -18.711 | 1.00 | 0.00 | C |
| ATOM | 240 | HG1  | THR | N | 30 | -2.654 | -0.276  | -14.706 | 1.00 | 0.00 | H |
| ATOM | 241 | HG21 | THR | N | 30 | -2.437 | 2.594   | -15.258 | 1.00 | 0.00 | H |
| ATOM | 242 | HG22 | THR | N | 30 | -3.157 | 1.325   | -16.284 | 1.00 | 0.00 | H |
| ATOM | 243 | HG23 | THR | N | 30 | -1.855 | 2.352   | -16.921 | 1.00 | 0.00 | H |
| ATOM | 244 | H    | ILE | N | 35 | -4.268 | -6.536  | -5.166  | 1.00 | 0.00 | H |
| ATOM | 245 | CA   | ILE | N | 35 | -3.725 | -8.490  | -4.497  | 1.00 | 0.00 | C |
| ATOM | 246 | HG11 | ILE | N | 34 | -6.697 | -5.319  | -9.199  | 1.00 | 0.00 | H |
| ATOM | 247 | HG12 | ILE | N | 34 | -6.041 | -6.697  | -10.062 | 1.00 | 0.00 | H |
| ATOM | 248 | CD1  | ILE | N | 34 | -8.119 | -6.939  | -9.515  | 1.00 | 0.00 | C |
| ATOM | 249 | HG21 | ILE | N | 34 | -6.560 | -6.914  | -5.769  | 1.00 | 0.00 | H |
| ATOM | 250 | HG22 | ILE | N | 34 | -8.010 | -7.001  | -6.769  | 1.00 | 0.00 | H |
| ATOM | 251 | HG23 | ILE | N | 34 | -7.123 | -5.466  | -6.665  | 1.00 | 0.00 | H |
| ATOM | 252 | O    | PRO | N | 36 | -7.740 | -8.902  | -0.591  | 1.00 | 0.00 | O |
| ATOM | 253 | CA   | PRO | N | 36 | -6.464 | -9.999  | -2.293  | 1.00 | 0.00 | C |
| ATOM | 254 | OD1  | ASP | N | 43 | 6.939  | -6.102  | -5.866  | 1.00 | 0.00 | O |
| ATOM | 255 | OD2  | ASP | N | 43 | 6.317  | -4.313  | -4.627  | 1.00 | 0.00 | O |
| ATOM | 256 | H    | TYR | N | 44 | 5.502  | -2.973  | -5.487  | 1.00 | 0.00 | H |
| ATOM | 257 | CA   | TYR | N | 44 | 4.091  | -1.789  | -6.645  | 1.00 | 0.00 | C |
| ATOM | 258 | H    | ALA | N | 9  | 2.687  | 5.311   | -12.782 | 1.00 | 0.00 | H |
| ATOM | 259 | CA   | ALA | N | 9  | 0.967  | 4.261   | -13.525 | 1.00 | 0.00 | C |
| ATOM | 260 | HG21 | VAL | N | 8  | 4.089  | 10.326  | -14.463 | 1.00 | 0.00 | H |
| ATOM | 261 | HG22 | VAL | N | 8  | 3.799  | 9.953   | -12.744 | 1.00 | 0.00 | H |
| ATOM | 262 | HG23 | VAL | N | 8  | 2.476  | 10.572  | -13.762 | 1.00 | 0.00 | H |
| ATOM | 263 | HG11 | VAL | N | 8  | 3.027  | 8.896   | -16.273 | 1.00 | 0.00 | H |
| ATOM | 264 | HG12 | VAL | N | 8  | 2.258  | 7.348   | -15.878 | 1.00 | 0.00 | H |
| ATOM | 265 | HG13 | VAL | N | 8  | 1.384  | 8.855   | -15.603 | 1.00 | 0.00 | H |
| ATOM | 266 | HA   | TYR | N | 29 | -3.402 | -1.658  | -19.791 | 1.00 | 0.00 | H |
| ATOM | 267 | N    | TYR | N | 29 | -3.604 | -2.682  | -17.958 | 1.00 | 0.00 | N |
| ATOM | 268 | CB   | TYR | N | 29 | -4.659 | -0.533  | -18.387 | 1.00 | 0.00 | C |
| ATOM | 269 | HA   | ILE | N | 35 | -3.566 | -9.414  | -5.069  | 1.00 | 0.00 | H |
| ATOM | 270 | C    | ILE | N | 35 | -5.006 | -8.636  | -3.676  | 1.00 | 0.00 | C |
| ATOM | 271 | CB   | ILE | N | 35 | -2.471 | -8.233  | -3.613  | 1.00 | 0.00 | C |
| ATOM | 272 | HD11 | ILE | N | 34 | -8.501 | -6.545  | -10.460 | 1.00 | 0.00 | H |
| ATOM | 273 | HD12 | ILE | N | 34 | -8.837 | -6.643  | -8.737  | 1.00 | 0.00 | H |
| ATOM | 274 | HD13 | ILE | N | 34 | -8.131 | -8.039  | -9.569  | 1.00 | 0.00 | H |
| ATOM | 275 | HA   | PRO | N | 36 | -7.313 | -9.698  | -2.922  | 1.00 | 0.00 | H |
| ATOM | 276 | N    | PRO | N | 36 | -5.207 | -9.807  | -3.032  | 1.00 | 0.00 | N |
| ATOM | 277 | CB   | PRO | N | 36 | -6.496 | -11.520 | -2.020  | 1.00 | 0.00 | C |
| ATOM | 278 | HA   | TYR | N | 44 | 4.240  | -1.231  | -7.576  | 1.00 | 0.00 | H |
| ATOM | 279 | CB   | TYR | N | 44 | 3.125  | -2.947  | -6.927  | 1.00 | 0.00 | C |
| ATOM | 280 | C    | TYR | N | 44 | 3.602  | -0.781  | -5.593  | 1.00 | 0.00 | C |



|      |     |      |     |   |    |        |         |         |      |      |   |
|------|-----|------|-----|---|----|--------|---------|---------|------|------|---|
| ATOM | 281 | HA   | ALA | N | 9  | 0.712  | 4.248   | -14.594 | 1.00 | 0.00 | H |
| ATOM | 282 | CB   | ALA | N | 9  | 1.682  | 2.965   | -13.164 | 1.00 | 0.00 | C |
| ATOM | 283 | C    | ALA | N | 9  | -0.375 | 4.378   | -12.794 | 1.00 | 0.00 | C |
| ATOM | 284 | H    | TYR | N | 29 | -4.521 | -2.885  | -17.555 | 1.00 | 0.00 | H |
| ATOM | 285 | C    | THR | N | 28 | -2.708 | -3.696  | -18.077 | 1.00 | 0.00 | C |
| ATOM | 286 | HB1  | TYR | N | 29 | -4.605 | -0.268  | -17.322 | 1.00 | 0.00 | H |
| ATOM | 287 | HB2  | TYR | N | 29 | -5.562 | -1.151  | -18.496 | 1.00 | 0.00 | H |
| ATOM | 288 | CG   | TYR | N | 29 | -4.809 | 0.719   | -19.218 | 1.00 | 0.00 | C |
| ATOM | 289 | O    | ILE | N | 35 | -5.836 | -7.718  | -3.588  | 1.00 | 0.00 | O |
| ATOM | 290 | HB   | ILE | N | 35 | -2.556 | -8.891  | -2.730  | 1.00 | 0.00 | H |
| ATOM | 291 | CG2  | ILE | N | 35 | -1.217 | -8.639  | -4.397  | 1.00 | 0.00 | C |
| ATOM | 292 | CG1  | ILE | N | 35 | -2.438 | -6.780  | -3.102  | 1.00 | 0.00 | C |
| ATOM | 293 | CD   | PRO | N | 36 | -4.443 | -11.058 | -3.213  | 1.00 | 0.00 | C |
| ATOM | 294 | HB1  | PRO | N | 36 | -6.946 | -11.757 | -1.047  | 1.00 | 0.00 | H |
| ATOM | 295 | HB2  | PRO | N | 36 | -7.121 | -12.007 | -2.784  | 1.00 | 0.00 | H |
| ATOM | 296 | CG   | PRO | N | 36 | -5.037 | -11.985 | -2.151  | 1.00 | 0.00 | C |
| ATOM | 297 | HB1  | TYR | N | 44 | 2.146  | -2.523  | -7.193  | 1.00 | 0.00 | H |
| ATOM | 298 | HB2  | TYR | N | 44 | 2.976  | -3.535  | -6.009  | 1.00 | 0.00 | H |
| ATOM | 299 | CG   | TYR | N | 44 | 3.666  | -3.804  | -8.048  | 1.00 | 0.00 | C |
| ATOM | 300 | O    | TYR | N | 44 | 2.656  | -0.983  | -4.830  | 1.00 | 0.00 | O |
| ATOM | 301 | N    | ALA | N | 45 | 4.357  | 0.343   | -5.572  | 1.00 | 0.00 | N |
| ATOM | 302 | HB1  | ALA | N | 9  | 2.570  | 2.862   | -13.789 | 1.00 | 0.00 | H |
| ATOM | 303 | HB2  | ALA | N | 9  | 1.985  | 2.959   | -12.110 | 1.00 | 0.00 | H |
| ATOM | 304 | HB3  | ALA | N | 9  | 1.026  | 2.106   | -13.358 | 1.00 | 0.00 | H |
| ATOM | 305 | O    | ALA | N | 9  | -1.422 | 4.061   | -13.372 | 1.00 | 0.00 | O |
| ATOM | 306 | N    | ARG | N | 10 | -0.349 | 4.817   | -11.517 | 1.00 | 0.00 | N |
| ATOM | 307 | O    | THR | N | 28 | -1.711 | -3.633  | -18.795 | 1.00 | 0.00 | O |
| ATOM | 308 | CA   | THR | N | 28 | -2.958 | -4.954  | -17.222 | 1.00 | 0.00 | C |
| ATOM | 309 | CD1  | TYR | N | 29 | -5.050 | 0.659   | -20.596 | 1.00 | 0.00 | C |
| ATOM | 310 | CD2  | TYR | N | 29 | -4.771 | 1.989   | -18.626 | 1.00 | 0.00 | C |
| ATOM | 311 | HG21 | ILE | N | 35 | -0.296 | -8.416  | -3.840  | 1.00 | 0.00 | H |
| ATOM | 312 | HG22 | ILE | N | 35 | -1.166 | -8.101  | -5.355  | 1.00 | 0.00 | H |
| ATOM | 313 | HG23 | ILE | N | 35 | -1.217 | -9.718  | -4.621  | 1.00 | 0.00 | H |
| ATOM | 314 | HG11 | ILE | N | 35 | -2.235 | -6.101  | -3.948  | 1.00 | 0.00 | H |
| ATOM | 315 | HG12 | ILE | N | 35 | -3.436 | -6.498  | -2.726  | 1.00 | 0.00 | H |
| ATOM | 316 | CD1  | ILE | N | 35 | -1.410 | -6.522  | -2.004  | 1.00 | 0.00 | C |
| ATOM | 317 | HD1  | PRO | N | 36 | -3.368 | -10.897 | -3.063  | 1.00 | 0.00 | H |
| ATOM | 318 | HD2  | PRO | N | 36 | -4.593 | -11.452 | -4.233  | 1.00 | 0.00 | H |
| ATOM | 319 | HG1  | PRO | N | 36 | -4.950 | -13.041 | -2.436  | 1.00 | 0.00 | H |
| ATOM | 320 | HG2  | PRO | N | 36 | -4.485 | -11.848 | -1.211  | 1.00 | 0.00 | H |
| ATOM | 321 | CD1  | TYR | N | 44 | 3.370  | -3.510  | -9.382  | 1.00 | 0.00 | C |
| ATOM | 322 | CD2  | TYR | N | 44 | 4.565  | -4.848  | -7.791  | 1.00 | 0.00 | C |
| ATOM | 323 | H    | ALA | N | 45 | 5.095  | 0.431   | -6.265  | 1.00 | 0.00 | H |
| ATOM | 324 | CA   | ALA | N | 45 | 4.362  | 1.255   | -4.455  | 1.00 | 0.00 | C |
| ATOM | 325 | H    | ARG | N | 10 | 0.546  | 5.022   | -11.071 | 1.00 | 0.00 | H |
| ATOM | 326 | CA   | ARG | N | 10 | -1.582 | 5.064   | -10.785 | 1.00 | 0.00 | C |
| ATOM | 327 | HA   | THR | N | 28 | -1.945 | -5.297  | -16.969 | 1.00 | 0.00 | H |
| ATOM | 328 | N    | THR | N | 28 | -3.678 | -4.675  | -15.981 | 1.00 | 0.00 | N |
| ATOM | 329 | CB   | THR | N | 28 | -3.628 | -6.063  | -18.044 | 1.00 | 0.00 | C |
| ATOM | 330 | HD1  | TYR | N | 29 | -5.119 | -0.309  | -21.098 | 1.00 | 0.00 | H |
| ATOM | 331 | CE1  | TYR | N | 29 | -5.206 | 1.817   | -21.355 | 1.00 | 0.00 | C |
| ATOM | 332 | HD2  | TYR | N | 29 | -4.614 | 2.077   | -17.551 | 1.00 | 0.00 | H |
| ATOM | 333 | CE2  | TYR | N | 29 | -4.923 | 3.160   | -19.367 | 1.00 | 0.00 | C |
| ATOM | 334 | HD11 | ILE | N | 35 | -1.364 | -5.447  | -1.786  | 1.00 | 0.00 | H |
| ATOM | 335 | HD12 | ILE | N | 35 | -0.386 | -6.804  | -2.290  | 1.00 | 0.00 | H |
| ATOM | 336 | HD13 | ILE | N | 35 | -1.659 | -7.078  | -1.083  | 1.00 | 0.00 | H |
| ATOM | 337 | HD1  | TYR | N | 44 | 2.676  | -2.704  | -9.616  | 1.00 | 0.00 | H |
| ATOM | 338 | CE1  | TYR | N | 44 | 3.909  | -4.252  | -10.433 | 1.00 | 0.00 | C |
| ATOM | 339 | HD2  | TYR | N | 44 | 4.819  | -5.113  | -6.767  | 1.00 | 0.00 | H |
| ATOM | 340 | CE2  | TYR | N | 44 | 5.150  | -5.574  | -8.826  | 1.00 | 0.00 | C |
| ATOM | 341 | HA   | ALA | N | 45 | 4.451  | 0.662   | -3.538  | 1.00 | 0.00 | H |
| ATOM | 342 | C    | ALA | N | 45 | 3.089  | 2.073   | -4.294  | 1.00 | 0.00 | C |
| ATOM | 343 | CB   | ALA | N | 45 | 5.559  | 2.210   | -4.577  | 1.00 | 0.00 | C |

|      |     |      |     |   |    |        |        |         |      |      |   |
|------|-----|------|-----|---|----|--------|--------|---------|------|------|---|
| ATOM | 344 | HA   | ARG | N | 10 | -2.199 | 4.160  | -10.855 | 1.00 | 0.00 | H |
| ATOM | 345 | CB   | ARG | N | 10 | -1.305 | 5.363  | -9.300  | 1.00 | 0.00 | C |
| ATOM | 346 | C    | ARG | N | 10 | -2.450 | 6.145  | -11.463 | 1.00 | 0.00 | C |
| ATOM | 347 | H    | THR | N | 28 | -4.647 | -4.982 | -15.876 | 1.00 | 0.00 | H |
| ATOM | 348 | C    | ALA | N | 27 | -3.107 | -3.861 | -15.065 | 1.00 | 0.00 | C |
| ATOM | 349 | HB   | THR | N | 28 | -3.072 | -6.102 | -18.998 | 1.00 | 0.00 | H |
| ATOM | 350 | OG1  | THR | N | 28 | -4.973 | -5.624 | -18.286 | 1.00 | 0.00 | O |
| ATOM | 351 | CG2  | THR | N | 28 | -3.568 | -7.426 | -17.369 | 1.00 | 0.00 | C |
| ATOM | 352 | HE1  | TYR | N | 29 | -5.395 | 1.746  | -22.428 | 1.00 | 0.00 | H |
| ATOM | 353 | CZ   | TYR | N | 29 | -5.116 | 3.075  | -20.747 | 1.00 | 0.00 | C |
| ATOM | 354 | HE2  | TYR | N | 29 | -4.882 | 4.136  | -18.879 | 1.00 | 0.00 | H |
| ATOM | 355 | HE1  | TYR | N | 44 | 3.588  | -4.038 | -11.456 | 1.00 | 0.00 | H |
| ATOM | 356 | CZ   | TYR | N | 44 | 4.802  | -5.288 | -10.148 | 1.00 | 0.00 | C |
| ATOM | 357 | HE2  | TYR | N | 44 | 5.859  | -6.371 | -8.601  | 1.00 | 0.00 | H |
| ATOM | 358 | O    | ALA | N | 45 | 2.831  | 2.503  | -3.142  | 1.00 | 0.00 | O |
| ATOM | 359 | N    | ASN | N | 46 | 2.375  | 2.396  | -5.368  | 1.00 | 0.00 | N |
| ATOM | 360 | HB1  | ALA | N | 45 | 5.630  | 2.845  | -3.683  | 1.00 | 0.00 | H |
| ATOM | 361 | HB2  | ALA | N | 45 | 6.491  | 1.633  | -4.675  | 1.00 | 0.00 | H |
| ATOM | 362 | HB3  | ALA | N | 45 | 5.454  | 2.863  | -5.457  | 1.00 | 0.00 | H |
| ATOM | 363 | HB1  | ARG | N | 10 | -0.721 | 4.528  | -8.884  | 1.00 | 0.00 | H |
| ATOM | 364 | HB2  | ARG | N | 10 | -0.668 | 6.257  | -9.232  | 1.00 | 0.00 | H |
| ATOM | 365 | CG   | ARG | N | 10 | -2.577 | 5.592  | -8.471  | 1.00 | 0.00 | C |
| ATOM | 366 | O    | ARG | N | 10 | -3.664 | 5.925  | -11.606 | 1.00 | 0.00 | O |
| ATOM | 367 | N    | SER | N | 11 | -1.879 | 7.285  | -11.895 | 1.00 | 0.00 | N |
| ATOM | 368 | O    | ALA | N | 27 | -1.983 | -3.376 | -15.232 | 1.00 | 0.00 | O |
| ATOM | 369 | CA   | ALA | N | 27 | -3.899 | -3.519 | -13.788 | 1.00 | 0.00 | C |
| ATOM | 370 | HG1  | THR | N | 28 | -5.391 | -6.245 | -18.903 | 1.00 | 0.00 | H |
| ATOM | 371 | HG21 | THR | N | 28 | -2.533 | -7.770 | -17.246 | 1.00 | 0.00 | H |
| ATOM | 372 | HG22 | THR | N | 28 | -4.052 | -7.420 | -16.381 | 1.00 | 0.00 | H |
| ATOM | 373 | HG23 | THR | N | 28 | -4.088 | -8.175 | -17.990 | 1.00 | 0.00 | H |
| ATOM | 374 | OH   | TYR | N | 29 | -5.222 | 4.242  | -21.460 | 1.00 | 0.00 | O |
| ATOM | 375 | OH   | TYR | N | 44 | 5.363  | -6.061 | -11.142 | 1.00 | 0.00 | O |
| ATOM | 376 | H    | ASN | N | 46 | 2.589  | 1.920  | -6.255  | 1.00 | 0.00 | H |
| ATOM | 377 | CA   | ASN | N | 46 | 1.468  | 3.539  | -5.397  | 1.00 | 0.00 | C |
| ATOM | 378 | HG1  | ARG | N | 10 | -3.166 | 6.389  | -8.939  | 1.00 | 0.00 | H |
| ATOM | 379 | HG2  | ARG | N | 10 | -2.287 | 5.982  | -7.484  | 1.00 | 0.00 | H |
| ATOM | 380 | CD   | ARG | N | 10 | -3.509 | 4.390  | -8.278  | 1.00 | 0.00 | C |
| ATOM | 381 | H    | SER | N | 11 | -0.900 | 7.487  | -11.660 | 1.00 | 0.00 | H |
| ATOM | 382 | CA   | SER | N | 11 | -2.657 | 8.268  | -12.648 | 1.00 | 0.00 | C |
| ATOM | 383 | HA   | ALA | N | 27 | -3.262 | -2.787 | -13.286 | 1.00 | 0.00 | H |
| ATOM | 384 | N    | ALA | N | 27 | -5.167 | -2.878 | -14.122 | 1.00 | 0.00 | N |
| ATOM | 385 | CB   | ALA | N | 27 | -4.133 | -4.723 | -12.874 | 1.00 | 0.00 | C |
| ATOM | 386 | HH   | TYR | N | 29 | -5.017 | 4.054  | -22.389 | 1.00 | 0.00 | H |
| ATOM | 387 | HH   | TYR | N | 44 | 4.934  | -5.840 | -11.983 | 1.00 | 0.00 | H |
| ATOM | 388 | HA   | ASN | N | 46 | 1.457  | 3.962  | -4.386  | 1.00 | 0.00 | H |
| ATOM | 389 | CB   | ASN | N | 46 | 2.013  | 4.579  | -6.393  | 1.00 | 0.00 | C |
| ATOM | 390 | C    | ASN | N | 46 | -0.007 | 3.214  | -5.708  | 1.00 | 0.00 | C |
| ATOM | 391 | HD1  | ARG | N | 10 | -3.656 | 3.858  | -9.232  | 1.00 | 0.00 | H |
| ATOM | 392 | HD2  | ARG | N | 10 | -4.505 | 4.757  | -7.978  | 1.00 | 0.00 | H |
| ATOM | 393 | NE   | ARG | N | 10 | -2.981 | 3.472  | -7.269  | 1.00 | 0.00 | N |
| ATOM | 394 | HA   | SER | N | 11 | -3.438 | 8.700  | -12.003 | 1.00 | 0.00 | H |
| ATOM | 395 | CB   | SER | N | 11 | -1.777 | 9.401  | -13.195 | 1.00 | 0.00 | C |
| ATOM | 396 | C    | SER | N | 11 | -3.404 | 7.633  | -13.841 | 1.00 | 0.00 | C |
| ATOM | 397 | H    | ALA | N | 27 | -6.020 | -3.397 | -13.932 | 1.00 | 0.00 | H |
| ATOM | 398 | C    | CYS | N | 26 | -5.276 | -1.697 | -14.747 | 1.00 | 0.00 | C |
| ATOM | 399 | HB1  | ALA | N | 27 | -3.171 | -5.196 | -12.653 | 1.00 | 0.00 | H |
| ATOM | 400 | HB2  | ALA | N | 27 | -4.797 | -5.457 | -13.349 | 1.00 | 0.00 | H |
| ATOM | 401 | HB3  | ALA | N | 27 | -4.589 | -4.390 | -11.929 | 1.00 | 0.00 | H |
| ATOM | 402 | HB1  | ASN | N | 46 | 1.955  | 4.199  | -7.422  | 1.00 | 0.00 | H |
| ATOM | 403 | HB2  | ASN | N | 46 | 1.380  | 5.476  | -6.327  | 1.00 | 0.00 | H |
| ATOM | 404 | CG   | ASN | N | 46 | 3.469  | 4.938  | -6.136  | 1.00 | 0.00 | C |
| ATOM | 405 | OXT  | ASN | N | 46 | -0.774 | 4.211  | -5.764  | 1.00 | 0.00 | O |
| ATOM | 406 | O    | ASN | N | 46 | -0.344 | 2.010  | -5.899  | 1.00 | 0.00 | O |

|      |     |      |     |   |    |         |        |         |      |      |   |
|------|-----|------|-----|---|----|---------|--------|---------|------|------|---|
| ATOM | 407 | HE   | ARG | N | 10 | -2.167  | 3.786  | -6.691  | 1.00 | 0.00 | H |
| ATOM | 408 | CZ   | ARG | N | 10 | -3.638  | 2.403  | -6.798  | 1.00 | 0.00 | C |
| ATOM | 409 | HB1  | SER | N | 11 | -1.044  | 8.986  | -13.905 | 1.00 | 0.00 | H |
| ATOM | 410 | HB2  | SER | N | 11 | -2.441  | 10.081 | -13.757 | 1.00 | 0.00 | H |
| ATOM | 411 | OG   | SER | N | 11 | -1.132  | 10.066 | -12.123 | 1.00 | 0.00 | O |
| ATOM | 412 | O    | SER | N | 11 | -4.600  | 7.885  | -14.062 | 1.00 | 0.00 | O |
| ATOM | 413 | N    | ASN | N | 12 | -2.642  | 6.856  | -14.623 | 1.00 | 0.00 | N |
| ATOM | 414 | O    | CYS | N | 26 | -4.323  | -0.934 | -14.976 | 1.00 | 0.00 | O |
| ATOM | 415 | CA   | CYS | N | 26 | -6.677  | -1.312 | -15.248 | 1.00 | 0.00 | C |
| ATOM | 416 | OD1  | ASN | N | 46 | 4.341   | 4.771  | -6.995  | 1.00 | 0.00 | O |
| ATOM | 417 | ND2  | ASN | N | 46 | 3.762   | 5.458  | -4.920  | 1.00 | 0.00 | N |
| ATOM | 418 | NH2  | ARG | N | 10 | -3.142  | 1.772  | -5.723  | 1.00 | 0.00 | N |
| ATOM | 419 | NH1  | ARG | N | 10 | -4.797  | 2.004  | -7.349  | 1.00 | 0.00 | N |
| ATOM | 420 | H    | SER | N | 11 | -0.958  | 11.001 | -12.376 | 1.00 | 0.00 | H |
| ATOM | 421 | H    | ASN | N | 12 | -1.642  | 6.781  | -14.413 | 1.00 | 0.00 | H |
| ATOM | 422 | CA   | ASN | N | 12 | -3.121  | 6.303  | -15.882 | 1.00 | 0.00 | C |
| ATOM | 423 | HA   | CYS | N | 26 | -6.485  | -0.887 | -16.242 | 1.00 | 0.00 | H |
| ATOM | 424 | N    | CYS | N | 26 | -7.545  | -2.456 | -15.414 | 1.00 | 0.00 | N |
| ATOM | 425 | CB   | CYS | N | 26 | -7.357  | -0.244 | -14.401 | 1.00 | 0.00 | C |
| ATOM | 426 | HD21 | ASN | N | 46 | 4.726   | 5.726  | -4.756  | 1.00 | 0.00 | H |
| ATOM | 427 | HD22 | ASN | N | 46 | 3.099   | 5.574  | -4.153  | 1.00 | 0.00 | H |
| ATOM | 428 | HH21 | ARG | N | 10 | -3.544  | 0.876  | -5.431  | 1.00 | 0.00 | H |
| ATOM | 429 | HH22 | ARG | N | 10 | -2.125  | 1.894  | -5.569  | 1.00 | 0.00 | H |
| ATOM | 430 | HH11 | ARG | N | 10 | -5.087  | 2.399  | -8.236  | 1.00 | 0.00 | H |
| ATOM | 431 | HH12 | ARG | N | 10 | -5.243  | 1.112  | -7.107  | 1.00 | 0.00 | H |
| ATOM | 432 | HA   | ASN | N | 12 | -3.643  | 7.088  | -16.445 | 1.00 | 0.00 | H |
| ATOM | 433 | CB   | ASN | N | 12 | -1.926  | 5.789  | -16.702 | 1.00 | 0.00 | C |
| ATOM | 434 | C    | ASN | N | 12 | -4.184  | 5.214  | -15.608 | 1.00 | 0.00 | C |
| ATOM | 435 | H    | CYS | N | 26 | -8.316  | -2.596 | -14.764 | 1.00 | 0.00 | H |
| ATOM | 436 | C    | LEU | N | 25 | -7.409  | -3.270 | -16.485 | 1.00 | 0.00 | C |
| ATOM | 437 | HB1  | CYS | N | 26 | -6.704  | 0.626  | -14.259 | 1.00 | 0.00 | H |
| ATOM | 438 | HB2  | CYS | N | 26 | -7.619  | -0.630 | -13.404 | 1.00 | 0.00 | H |
| ATOM | 439 | SG   | CYS | N | 26 | -8.961  | 0.281  | -15.125 | 1.00 | 0.00 | S |
| ATOM | 440 | HB1  | ASN | N | 12 | -2.297  | 5.288  | -17.610 | 1.00 | 0.00 | H |
| ATOM | 441 | HB2  | ASN | N | 12 | -1.371  | 5.031  | -16.125 | 1.00 | 0.00 | H |
| ATOM | 442 | CG   | ASN | N | 12 | -0.964  | 6.930  | -17.094 | 1.00 | 0.00 | C |
| ATOM | 443 | O    | ASN | N | 12 | -5.213  | 5.112  | -16.295 | 1.00 | 0.00 | O |
| ATOM | 444 | N    | PHE | N | 13 | -3.914  | 4.432  | -14.550 | 1.00 | 0.00 | N |
| ATOM | 445 | O    | LEU | N | 25 | -6.567  | -3.080 | -17.365 | 1.00 | 0.00 | O |
| ATOM | 446 | CA   | LEU | N | 25 | -8.373  | -4.458 | -16.553 | 1.00 | 0.00 | C |
| ATOM | 447 | SG   | CYS | N | 16 | -8.419  | 0.856  | -17.056 | 1.00 | 0.00 | S |
| ATOM | 448 | OD1  | ASN | N | 12 | -1.147  | 8.082  | -16.693 | 1.00 | 0.00 | O |
| ATOM | 449 | ND2  | ASN | N | 12 | 0.077   | 6.604  | -17.882 | 1.00 | 0.00 | N |
| ATOM | 450 | H    | PHE | N | 13 | -3.024  | 4.556  | -14.056 | 1.00 | 0.00 | H |
| ATOM | 451 | CA   | PHE | N | 13 | -4.835  | 3.463  | -13.984 | 1.00 | 0.00 | C |
| ATOM | 452 | HA   | LEU | N | 25 | -7.817  | -5.221 | -17.110 | 1.00 | 0.00 | H |
| ATOM | 453 | N    | LEU | N | 25 | -8.673  | -4.980 | -15.220 | 1.00 | 0.00 | N |
| ATOM | 454 | CB   | LEU | N | 25 | -9.675  | -4.076 | -17.269 | 1.00 | 0.00 | C |
| ATOM | 455 | CB   | CYS | N | 16 | -7.826  | 2.567  | -16.817 | 1.00 | 0.00 | C |
| ATOM | 456 | HD21 | ASN | N | 12 | 0.272   | 5.681  | -18.257 | 1.00 | 0.00 | H |
| ATOM | 457 | HD22 | ASN | N | 12 | 0.684   | 7.367  | -18.189 | 1.00 | 0.00 | H |
| ATOM | 458 | HA   | PHE | N | 13 | -5.105  | 2.703  | -14.733 | 1.00 | 0.00 | H |
| ATOM | 459 | C    | PHE | N | 13 | -6.152  | 4.128  | -13.574 | 1.00 | 0.00 | C |
| ATOM | 460 | CB   | PHE | N | 13 | -4.134  | 2.804  | -12.773 | 1.00 | 0.00 | C |
| ATOM | 461 | H    | LEU | N | 25 | -9.553  | -4.710 | -14.783 | 1.00 | 0.00 | H |
| ATOM | 462 | C    | ALA | N | 24 | -7.680  | -5.444 | -14.426 | 1.00 | 0.00 | C |
| ATOM | 463 | HB1  | LEU | N | 25 | -10.260 | -3.457 | -16.576 | 1.00 | 0.00 | H |
| ATOM | 464 | HB2  | LEU | N | 25 | -9.425  | -3.428 | -18.125 | 1.00 | 0.00 | H |
| ATOM | 465 | CG   | LEU | N | 25 | -10.528 | -5.263 | -17.753 | 1.00 | 0.00 | C |
| ATOM | 466 | HB1  | CYS | N | 16 | -7.235  | 2.607  | -15.893 | 1.00 | 0.00 | H |
| ATOM | 467 | HB2  | CYS | N | 16 | -7.150  | 2.753  | -17.664 | 1.00 | 0.00 | H |
| ATOM | 468 | CA   | CYS | N | 16 | -8.910  | 3.649  | -16.795 | 1.00 | 0.00 | C |
| ATOM | 469 | O    | PHE | N | 13 | -7.237  | 3.579  | -13.826 | 1.00 | 0.00 | O |

|      |     |      |     |   |    |         |        |         |      |      |   |
|------|-----|------|-----|---|----|---------|--------|---------|------|------|---|
| ATOM | 470 | N    | ASN | N | 14 | -6.046  | 5.293  | -12.919 | 1.00 | 0.00 | N |
| ATOM | 471 | HB1  | PHE | N | 13 | -3.671  | 3.609  | -12.195 | 1.00 | 0.00 | H |
| ATOM | 472 | HB2  | PHE | N | 13 | -3.323  | 2.172  | -13.152 | 1.00 | 0.00 | H |
| ATOM | 473 | CG   | PHE | N | 13 | -5.034  | 2.009  | -11.872 | 1.00 | 0.00 | C |
| ATOM | 474 | O    | ALA | N | 24 | -6.510  | -5.532 | -14.804 | 1.00 | 0.00 | O |
| ATOM | 475 | CA   | ALA | N | 24 | -8.085  | -5.948 | -13.033 | 1.00 | 0.00 | C |
| ATOM | 476 | HG   | LEU | N | 25 | -10.658 | -5.948 | -16.901 | 1.00 | 0.00 | H |
| ATOM | 477 | CD1  | LEU | N | 25 | -9.838  | -6.038 | -18.876 | 1.00 | 0.00 | C |
| ATOM | 478 | CD2  | LEU | N | 25 | -11.923 | -4.783 | -18.177 | 1.00 | 0.00 | C |
| ATOM | 479 | HA   | CYS | N | 16 | -9.364  | 3.734  | -17.789 | 1.00 | 0.00 | H |
| ATOM | 480 | N    | CYS | N | 16 | -8.265  | 4.900  | -16.439 | 1.00 | 0.00 | N |
| ATOM | 481 | C    | CYS | N | 16 | -10.115 | 3.340  | -15.881 | 1.00 | 0.00 | C |
| ATOM | 482 | H    | ASN | N | 14 | -5.116  | 5.628  | -12.646 | 1.00 | 0.00 | H |
| ATOM | 483 | CA   | ASN | N | 14 | -7.209  | 6.003  | -12.421 | 1.00 | 0.00 | C |
| ATOM | 484 | CD1  | PHE | N | 13 | -5.130  | 0.622  | -12.016 | 1.00 | 0.00 | C |
| ATOM | 485 | CD2  | PHE | N | 13 | -5.791  | 2.646  | -10.875 | 1.00 | 0.00 | C |
| ATOM | 486 | HA   | ALA | N | 24 | -7.147  | -5.971 | -12.460 | 1.00 | 0.00 | H |
| ATOM | 487 | N    | ALA | N | 24 | -9.009  | -5.040 | -12.354 | 1.00 | 0.00 | N |
| ATOM | 488 | CB   | ALA | N | 24 | -8.664  | -7.357 | -13.150 | 1.00 | 0.00 | C |
| ATOM | 489 | HD11 | LEU | N | 25 | -8.869  | -6.456 | -18.569 | 1.00 | 0.00 | H |
| ATOM | 490 | HD12 | LEU | N | 25 | -10.451 | -6.884 | -19.220 | 1.00 | 0.00 | H |
| ATOM | 491 | HD13 | LEU | N | 25 | -9.656  | -5.389 | -19.746 | 1.00 | 0.00 | H |
| ATOM | 492 | HD21 | LEU | N | 25 | -12.459 | -4.295 | -17.350 | 1.00 | 0.00 | H |
| ATOM | 493 | HD22 | LEU | N | 25 | -12.550 | -5.620 | -18.521 | 1.00 | 0.00 | H |
| ATOM | 494 | HD23 | LEU | N | 25 | -11.861 | -4.050 | -18.999 | 1.00 | 0.00 | H |
| ATOM | 495 | H    | CYS | N | 16 | -7.275  | 4.900  | -16.183 | 1.00 | 0.00 | H |
| ATOM | 496 | C    | VAL | N | 15 | -8.971  | 6.052  | -16.410 | 1.00 | 0.00 | C |
| ATOM | 497 | O    | CYS | N | 16 | -11.188 | 2.966  | -16.385 | 1.00 | 0.00 | O |
| ATOM | 498 | N    | ARG | N | 17 | -9.977  | 3.500  | -14.556 | 1.00 | 0.00 | N |
| ATOM | 499 | HA   | ASN | N | 14 | -7.833  | 5.322  | -11.824 | 1.00 | 0.00 | H |
| ATOM | 500 | CB   | ASN | N | 14 | -6.783  | 7.188  | -11.557 | 1.00 | 0.00 | C |
| ATOM | 501 | C    | ASN | N | 14 | -8.107  | 6.495  | -13.568 | 1.00 | 0.00 | C |
| ATOM | 502 | HD1  | PHE | N | 13 | -4.534  | 0.132  | -12.785 | 1.00 | 0.00 | H |
| ATOM | 503 | CE1  | PHE | N | 13 | -5.984  | -0.122 | -11.203 | 1.00 | 0.00 | C |
| ATOM | 504 | HD2  | PHE | N | 13 | -5.724  | 3.724  | -10.728 | 1.00 | 0.00 | H |
| ATOM | 505 | CE2  | PHE | N | 13 | -6.645  | 1.901  | -10.064 | 1.00 | 0.00 | C |
| ATOM | 506 | H    | ALA | N | 24 | -9.922  | -5.378 | -12.067 | 1.00 | 0.00 | H |
| ATOM | 507 | C    | GLU | N | 23 | -8.607  | -3.799 | -11.966 | 1.00 | 0.00 | C |
| ATOM | 508 | HB1  | ALA | N | 24 | -7.916  | -8.018 | -13.603 | 1.00 | 0.00 | H |
| ATOM | 509 | HB2  | ALA | N | 24 | -9.556  | -7.374 | -13.785 | 1.00 | 0.00 | H |
| ATOM | 510 | HB3  | ALA | N | 24 | -8.929  | -7.767 | -12.167 | 1.00 | 0.00 | H |
| ATOM | 511 | O    | VAL | N | 15 | -10.145 | 6.126  | -16.780 | 1.00 | 0.00 | O |
| ATOM | 512 | CA   | VAL | N | 15 | -8.225  | 7.280  | -15.881 | 1.00 | 0.00 | C |
| ATOM | 513 | H    | ARG | N | 17 | -9.050  | 3.723  | -14.179 | 1.00 | 0.00 | H |
| ATOM | 514 | CA   | ARG | N | 17 | -11.083 | 3.166  | -13.664 | 1.00 | 0.00 | C |
| ATOM | 515 | HB1  | ASN | N | 14 | -6.121  | 7.853  | -12.133 | 1.00 | 0.00 | H |
| ATOM | 516 | HB2  | ASN | N | 14 | -7.690  | 7.758  | -11.303 | 1.00 | 0.00 | H |
| ATOM | 517 | CG   | ASN | N | 14 | -6.135  | 6.790  | -10.229 | 1.00 | 0.00 | C |
| ATOM | 518 | O    | ASN | N | 14 | -9.340  | 6.479  | -13.445 | 1.00 | 0.00 | O |
| ATOM | 519 | N    | VAL | N | 15 | -7.479  | 6.958  | -14.668 | 1.00 | 0.00 | N |
| ATOM | 520 | HE1  | PHE | N | 13 | -6.063  | -1.202 | -11.344 | 1.00 | 0.00 | H |
| ATOM | 521 | CZ   | PHE | N | 13 | -6.750  | 0.519  | -10.229 | 1.00 | 0.00 | C |
| ATOM | 522 | HE2  | PHE | N | 13 | -7.235  | 2.406  | -9.295  | 1.00 | 0.00 | H |
| ATOM | 523 | O    | GLU | N | 23 | -7.506  | -3.348 | -12.290 | 1.00 | 0.00 | O |
| ATOM | 524 | CA   | GLU | N | 23 | -9.515  | -3.010 | -11.008 | 1.00 | 0.00 | C |
| ATOM | 525 | HA   | VAL | N | 15 | -9.026  | 7.990  | -15.628 | 1.00 | 0.00 | H |
| ATOM | 526 | CB   | VAL | N | 15 | -7.305  | 7.925  | -16.943 | 1.00 | 0.00 | C |
| ATOM | 527 | HA   | ARG | N | 17 | -11.483 | 2.177  | -13.928 | 1.00 | 0.00 | H |
| ATOM | 528 | C    | ARG | N | 17 | -12.267 | 4.129  | -13.860 | 1.00 | 0.00 | C |
| ATOM | 529 | CB   | ARG | N | 17 | -10.658 | 3.186  | -12.181 | 1.00 | 0.00 | C |
| ATOM | 530 | OD1  | ASN | N | 14 | -6.378  | 5.730  | -9.659  | 1.00 | 0.00 | O |
| ATOM | 531 | ND2  | ASN | N | 14 | -5.346  | 7.761  | -9.704  | 1.00 | 0.00 | N |
| ATOM | 532 | H    | VAL | N | 15 | -6.456  | 6.992  | -14.681 | 1.00 | 0.00 | H |

|      |     |      |     |   |    |         |        |         |      |      |   |
|------|-----|------|-----|---|----|---------|--------|---------|------|------|---|
| ATOM | 533 | HZ   | PHE | N | 13 | -7.422  | -0.046 | -9.590  | 1.00 | 0.00 | H |
| ATOM | 534 | HA   | GLU | N | 23 | -9.031  | -2.029 | -10.908 | 1.00 | 0.00 | H |
| ATOM | 535 | N    | GLU | N | 23 | -10.878 | -2.855 | -11.511 | 1.00 | 0.00 | N |
| ATOM | 536 | CB   | GLU | N | 23 | -9.566  | -3.715 | -9.634  | 1.00 | 0.00 | C |
| ATOM | 537 | HB   | VAL | N | 15 | -6.371  | 7.338  | -16.968 | 1.00 | 0.00 | H |
| ATOM | 538 | CG2  | VAL | N | 15 | -6.995  | 9.357  | -16.515 | 1.00 | 0.00 | C |
| ATOM | 539 | CG1  | VAL | N | 15 | -7.935  | 7.871  | -18.337 | 1.00 | 0.00 | C |
| ATOM | 540 | O    | ARG | N | 17 | -13.428 | 3.728  | -13.686 | 1.00 | 0.00 | O |
| ATOM | 541 | N    | LEU | N | 18 | -11.971 | 5.400  | -14.194 | 1.00 | 0.00 | N |
| ATOM | 542 | HB1  | ARG | N | 17 | -11.566 | 3.004  | -11.583 | 1.00 | 0.00 | H |
| ATOM | 543 | HB2  | ARG | N | 17 | -10.326 | 4.210  | -11.940 | 1.00 | 0.00 | H |
| ATOM | 544 | CG   | ARG | N | 17 | -9.540  | 2.209  | -11.775 | 1.00 | 0.00 | C |
| ATOM | 545 | HD21 | ASN | N | 14 | -5.060  | 8.542  | -10.279 | 1.00 | 0.00 | H |
| ATOM | 546 | HD22 | ASN | N | 14 | -4.848  | 7.637  | -8.823  | 1.00 | 0.00 | H |
| ATOM | 547 | H    | GLU | N | 23 | -11.583 | -2.650 | -10.808 | 1.00 | 0.00 | H |
| ATOM | 548 | C    | PRO | N | 22 | -11.266 | -2.748 | -12.807 | 1.00 | 0.00 | C |
| ATOM | 549 | HB1  | GLU | N | 23 | -8.548  | -4.025 | -9.366  | 1.00 | 0.00 | H |
| ATOM | 550 | HB2  | GLU | N | 23 | -10.143 | -4.644 | -9.765  | 1.00 | 0.00 | H |
| ATOM | 551 | CG   | GLU | N | 23 | -10.188 | -2.918 | -8.466  | 1.00 | 0.00 | C |
| ATOM | 552 | HG21 | VAL | N | 15 | -6.391  | 9.888  | -17.258 | 1.00 | 0.00 | H |
| ATOM | 553 | HG22 | VAL | N | 15 | -6.442  | 9.398  | -15.568 | 1.00 | 0.00 | H |
| ATOM | 554 | HG23 | VAL | N | 15 | -7.933  | 9.920  | -16.391 | 1.00 | 0.00 | H |
| ATOM | 555 | HG11 | VAL | N | 15 | -7.344  | 8.448  | -19.060 | 1.00 | 0.00 | H |
| ATOM | 556 | HG12 | VAL | N | 15 | -8.001  | 6.838  | -18.707 | 1.00 | 0.00 | H |
| ATOM | 557 | HG13 | VAL | N | 15 | -8.953  | 8.291  | -18.348 | 1.00 | 0.00 | H |
| ATOM | 558 | H    | LEU | N | 18 | -10.988 | 5.681  | -14.230 | 1.00 | 0.00 | H |
| ATOM | 559 | CA   | LEU | N | 18 | -12.955 | 6.477  | -14.196 | 1.00 | 0.00 | C |
| ATOM | 560 | HG1  | ARG | N | 17 | -8.694  | 2.305  | -12.471 | 1.00 | 0.00 | H |
| ATOM | 561 | HG2  | ARG | N | 17 | -9.147  | 2.538  | -10.803 | 1.00 | 0.00 | H |
| ATOM | 562 | CD   | ARG | N | 17 | -9.886  | 0.713  | -11.659 | 1.00 | 0.00 | C |
| ATOM | 563 | O    | PRO | N | 22 | -10.497 | -2.840 | -13.767 | 1.00 | 0.00 | O |
| ATOM | 564 | CA   | PRO | N | 22 | -12.790 | -2.652 | -12.951 | 1.00 | 0.00 | C |
| ATOM | 565 | HG1  | GLU | N | 23 | -10.611 | -3.644 | -7.764  | 1.00 | 0.00 | H |
| ATOM | 566 | HG2  | GLU | N | 23 | -11.016 | -2.282 | -8.815  | 1.00 | 0.00 | H |
| ATOM | 567 | CD   | GLU | N | 23 | -9.173  | -2.069 | -7.678  | 1.00 | 0.00 | C |
| ATOM | 568 | HA   | LEU | N | 18 | -13.198 | 6.717  | -13.150 | 1.00 | 0.00 | H |
| ATOM | 569 | C    | LEU | N | 18 | -14.314 | 6.107  | -14.797 | 1.00 | 0.00 | C |
| ATOM | 570 | CB   | LEU | N | 18 | -12.415 | 7.742  | -14.913 | 1.00 | 0.00 | C |
| ATOM | 571 | HD1  | ARG | N | 17 | -8.963  | 0.140  | -11.806 | 1.00 | 0.00 | H |
| ATOM | 572 | HD2  | ARG | N | 17 | -10.575 | 0.389  | -12.450 | 1.00 | 0.00 | H |
| ATOM | 573 | NE   | ARG | N | 17 | -10.395 | 0.297  | -10.346 | 1.00 | 0.00 | N |
| ATOM | 574 | HA   | PRO | N | 22 | -13.183 | -2.006 | -12.149 | 1.00 | 0.00 | H |
| ATOM | 575 | N    | PRO | N | 22 | -13.195 | -2.121 | -14.246 | 1.00 | 0.00 | N |
| ATOM | 576 | CB   | PRO | N | 22 | -13.433 | -4.055 | -12.892 | 1.00 | 0.00 | C |
| ATOM | 577 | OE2  | GLU | N | 23 | -8.667  | -2.593 | -6.660  | 1.00 | 0.00 | O |
| ATOM | 578 | OE1  | GLU | N | 23 | -8.875  | -0.914 | -8.148  | 1.00 | 0.00 | O |
| ATOM | 579 | O    | LEU | N | 18 | -15.343 | 6.385  | -14.141 | 1.00 | 0.00 | O |
| ATOM | 580 | N    | PRO | N | 19 | -14.398 | 5.598  | -16.037 | 1.00 | 0.00 | N |
| ATOM | 581 | HB1  | LEU | N | 18 | -11.389 | 7.544  | -15.249 | 1.00 | 0.00 | H |
| ATOM | 582 | HB2  | LEU | N | 18 | -12.990 | 7.912  | -15.838 | 1.00 | 0.00 | H |
| ATOM | 583 | CG   | LEU | N | 18 | -12.458 | 9.033  | -14.080 | 1.00 | 0.00 | C |
| ATOM | 584 | HE   | ARG | N | 17 | -9.722  | 0.014  | -9.617  | 1.00 | 0.00 | H |
| ATOM | 585 | CZ   | ARG | N | 17 | -11.679 | 0.294  | -9.955  | 1.00 | 0.00 | C |
| ATOM | 586 | C    | THR | N | 21 | -12.955 | -0.822 | -14.526 | 1.00 | 0.00 | C |
| ATOM | 587 | CD   | PRO | N | 22 | -14.097 | -3.031 | -14.968 | 1.00 | 0.00 | C |
| ATOM | 588 | HB1  | PRO | N | 22 | -13.725 | -4.340 | -11.875 | 1.00 | 0.00 | H |
| ATOM | 589 | HB2  | PRO | N | 22 | -12.717 | -4.805 | -13.260 | 1.00 | 0.00 | H |
| ATOM | 590 | CG   | PRO | N | 22 | -14.617 | -3.948 | -13.858 | 1.00 | 0.00 | C |
| ATOM | 591 | CA   | PRO | N | 19 | -15.720 | 5.360  | -16.644 | 1.00 | 0.00 | C |
| ATOM | 592 | CD   | PRO | N | 19 | -13.290 | 5.300  | -16.984 | 1.00 | 0.00 | C |
| ATOM | 593 | HG   | LEU | N | 18 | -11.788 | 8.886  | -13.211 | 1.00 | 0.00 | H |
| ATOM | 594 | CD1  | LEU | N | 18 | -11.902 | 10.181 | -14.932 | 1.00 | 0.00 | C |
| ATOM | 595 | CD2  | LEU | N | 18 | -13.857 | 9.382  | -13.555 | 1.00 | 0.00 | C |

|      |     |      |     |   |    |         |        |         |      |      |   |
|------|-----|------|-----|---|----|---------|--------|---------|------|------|---|
| ATOM | 596 | NH1  | ARG | N | 17 | -12.688 | 0.334  | -10.835 | 1.00 | 0.00 | N |
| ATOM | 597 | NH2  | ARG | N | 17 | -11.967 | 0.212  | -8.650  | 1.00 | 0.00 | N |
| ATOM | 598 | O    | THR | N | 21 | -12.370 | -0.089 | -13.712 | 1.00 | 0.00 | O |
| ATOM | 599 | CA   | THR | N | 21 | -13.378 | -0.259 | -15.890 | 1.00 | 0.00 | C |
| ATOM | 600 | HD1  | PRO | N | 22 | -14.900 | -2.462 | -15.446 | 1.00 | 0.00 | H |
| ATOM | 601 | HD2  | PRO | N | 22 | -13.540 | -3.594 | -15.732 | 1.00 | 0.00 | H |
| ATOM | 602 | HG1  | PRO | N | 22 | -14.932 | -4.933 | -14.237 | 1.00 | 0.00 | H |
| ATOM | 603 | HG2  | PRO | N | 22 | -15.478 | -3.475 | -13.360 | 1.00 | 0.00 | H |
| ATOM | 604 | HA   | PRO | N | 19 | -16.394 | 6.201  | -16.437 | 1.00 | 0.00 | H |
| ATOM | 605 | CB   | PRO | N | 19 | -15.384 | 5.212  | -18.134 | 1.00 | 0.00 | C |
| ATOM | 606 | C    | PRO | N | 19 | -16.440 | 4.099  | -16.137 | 1.00 | 0.00 | C |
| ATOM | 607 | HD1  | PRO | N | 19 | -12.508 | 4.705  | -16.514 | 1.00 | 0.00 | H |
| ATOM | 608 | HD2  | PRO | N | 19 | -12.832 | 6.240  | -17.327 | 1.00 | 0.00 | H |
| ATOM | 609 | CG   | PRO | N | 19 | -13.996 | 4.574  | -18.129 | 1.00 | 0.00 | C |
| ATOM | 610 | HD11 | LEU | N | 18 | -10.934 | 9.919  | -15.383 | 1.00 | 0.00 | H |
| ATOM | 611 | HD12 | LEU | N | 18 | -11.757 | 11.102 | -14.346 | 1.00 | 0.00 | H |
| ATOM | 612 | HD13 | LEU | N | 18 | -12.588 | 10.427 | -15.760 | 1.00 | 0.00 | H |
| ATOM | 613 | HD21 | LEU | N | 18 | -14.293 | 8.580  | -12.943 | 1.00 | 0.00 | H |
| ATOM | 614 | HD22 | LEU | N | 18 | -13.838 | 10.287 | -12.932 | 1.00 | 0.00 | H |
| ATOM | 615 | HD23 | LEU | N | 18 | -14.556 | 9.554  | -14.390 | 1.00 | 0.00 | H |
| ATOM | 616 | HH11 | ARG | N | 17 | -12.506 | 0.335  | -11.840 | 1.00 | 0.00 | H |
| ATOM | 617 | HH12 | ARG | N | 17 | -13.590 | 0.721  | -10.504 | 1.00 | 0.00 | H |
| ATOM | 618 | HH21 | ARG | N | 17 | -11.218 | 0.221  | -7.965  | 1.00 | 0.00 | H |
| ATOM | 619 | HH22 | ARG | N | 17 | -12.903 | -0.100 | -8.341  | 1.00 | 0.00 | H |
| ATOM | 620 | HA   | THR | N | 21 | -13.962 | -1.001 | -16.452 | 1.00 | 0.00 | H |
| ATOM | 621 | N    | THR | N | 21 | -14.199 | 0.906  | -15.672 | 1.00 | 0.00 | N |
| ATOM | 622 | CB   | THR | N | 21 | -12.125 | 0.111  | -16.711 | 1.00 | 0.00 | C |
| ATOM | 623 | HB1  | PRO | N | 19 | -16.139 | 4.640  | -18.677 | 1.00 | 0.00 | H |
| ATOM | 624 | HB2  | PRO | N | 19 | -15.318 | 6.207  | -18.591 | 1.00 | 0.00 | H |
| ATOM | 625 | O    | PRO | N | 19 | -17.608 | 3.903  | -16.458 | 1.00 | 0.00 | O |
| ATOM | 626 | N    | GLY | N | 20 | -15.679 | 3.220  | -15.427 | 1.00 | 0.00 | N |
| ATOM | 627 | HG1  | PRO | N | 19 | -13.484 | 4.702  | -19.089 | 1.00 | 0.00 | H |
| ATOM | 628 | HG2  | PRO | N | 19 | -14.054 | 3.494  | -17.919 | 1.00 | 0.00 | H |
| ATOM | 629 | H    | THR | N | 21 | -13.886 | 1.799  | -16.035 | 1.00 | 0.00 | H |
| ATOM | 630 | C    | GLY | N | 20 | -15.404 | 0.758  | -15.092 | 1.00 | 0.00 | C |
| ATOM | 631 | HB   | THR | N | 21 | -11.434 | 0.622  | -16.030 | 1.00 | 0.00 | H |
| ATOM | 632 | OG1  | THR | N | 21 | -12.489 | 1.015  | -17.743 | 1.00 | 0.00 | O |
| ATOM | 633 | CG2  | THR | N | 21 | -11.472 | -1.146 | -17.252 | 1.00 | 0.00 | C |
| ATOM | 634 | H    | GLY | N | 20 | -14.832 | 3.563  | -14.964 | 1.00 | 0.00 | H |
| ATOM | 635 | CA   | GLY | N | 20 | -16.247 | 2.004  | -14.888 | 1.00 | 0.00 | C |
| ATOM | 636 | O    | GLY | N | 20 | -15.802 | -0.350 | -14.712 | 1.00 | 0.00 | O |
| ATOM | 637 | HG1  | THR | N | 21 | -11.987 | 1.833  | -17.545 | 1.00 | 0.00 | H |
| ATOM | 638 | HG21 | THR | N | 21 | -11.151 | -1.776 | -16.412 | 1.00 | 0.00 | H |
| ATOM | 639 | HG22 | THR | N | 21 | -10.590 | -0.898 | -17.855 | 1.00 | 0.00 | H |
| ATOM | 640 | HG23 | THR | N | 21 | -12.166 | -1.722 | -17.879 | 1.00 | 0.00 | H |
| ATOM | 641 | HA1  | GLY | N | 20 | -17.223 | 1.821  | -15.358 | 1.00 | 0.00 | H |
| ATOM | 642 | HA2  | GLY | N | 20 | -16.411 | 2.111  | -13.805 | 1.00 | 0.00 | H |
| END  |     |      |     |   |    |         |        |         |      |      |   |

### 3) CRAMBIN – molecule as in the optimized 84W crystal

| COMPND | CRAMBIN OPTIMIZED CRYSTAL 84W GEOMETRY        |    |     |   |   |        |       |        |      |      |   |
|--------|-----------------------------------------------|----|-----|---|---|--------|-------|--------|------|------|---|
| AUTHOR | DELLE PIANE, CORNO, ORLANDO, DOVESI, UGLIENGO |    |     |   |   |        |       |        |      |      |   |
| ATOM   | 1                                             | N  | THR | N | 1 | -7.330 | 3.687 | -4.789 | 1.00 | 0.00 | N |
| ATOM   | 2                                             | H1 | THR | N | 1 | -7.752 | 2.757 | -4.913 | 1.00 | 0.00 | H |
| ATOM   | 3                                             | H2 | THR | N | 1 | -6.627 | 3.803 | -5.557 | 1.00 | 0.00 | H |
| ATOM   | 4                                             | H3 | THR | N | 1 | -8.043 | 4.470 | -4.836 | 1.00 | 0.00 | H |
| ATOM   | 5                                             | CA | THR | N | 1 | -6.680 | 3.696 | -3.453 | 1.00 | 0.00 | C |

|      |    |      |     |   |    |        |        |        |      |      |   |
|------|----|------|-----|---|----|--------|--------|--------|------|------|---|
| ATOM | 6  | HA   | THR | N | 1  | -7.478 | 3.693  | -2.697 | 1.00 | 0.00 | H |
| ATOM | 7  | C    | THR | N | 1  | -5.830 | 4.954  | -3.364 | 1.00 | 0.00 | C |
| ATOM | 8  | CB   | THR | N | 1  | -5.817 | 2.413  | -3.308 | 1.00 | 0.00 | C |
| ATOM | 9  | O    | THR | N | 1  | -5.269 | 5.378  | -4.383 | 1.00 | 0.00 | O |
| ATOM | 10 | N    | THR | N | 2  | -5.708 | 5.501  | -2.151 | 1.00 | 0.00 | N |
| ATOM | 11 | HB   | THR | N | 1  | -4.968 | 2.514  | -4.006 | 1.00 | 0.00 | H |
| ATOM | 12 | OG1  | THR | N | 1  | -6.631 | 1.324  | -3.713 | 1.00 | 0.00 | O |
| ATOM | 13 | CG2  | THR | N | 1  | -5.286 | 2.221  | -1.892 | 1.00 | 0.00 | C |
| ATOM | 14 | H    | THR | N | 2  | -6.142 | 5.059  | -1.322 | 1.00 | 0.00 | H |
| ATOM | 15 | CA   | THR | N | 2  | -4.777 | 6.584  | -1.921 | 1.00 | 0.00 | C |
| ATOM | 16 | HG1  | THR | N | 1  | -6.142 | 0.904  | -4.465 | 1.00 | 0.00 | H |
| ATOM | 17 | HG21 | THR | N | 1  | -4.752 | 1.262  | -1.834 | 1.00 | 0.00 | H |
| ATOM | 18 | HG22 | THR | N | 1  | -4.582 | 3.016  | -1.607 | 1.00 | 0.00 | H |
| ATOM | 19 | HG23 | THR | N | 1  | -6.103 | 2.204  | -1.154 | 1.00 | 0.00 | H |
| ATOM | 20 | HA   | THR | N | 2  | -4.418 | 6.907  | -2.903 | 1.00 | 0.00 | H |
| ATOM | 21 | C    | THR | N | 2  | -3.548 | 6.115  | -1.146 | 1.00 | 0.00 | C |
| ATOM | 22 | CB   | THR | N | 2  | -5.465 | 7.817  | -1.269 | 1.00 | 0.00 | C |
| ATOM | 23 | O    | THR | N | 2  | -3.606 | 5.269  | -0.228 | 1.00 | 0.00 | O |
| ATOM | 24 | N    | CYS | N | 3  | -2.428 | 6.734  | -1.541 | 1.00 | 0.00 | N |
| ATOM | 25 | HB   | THR | N | 2  | -4.668 | 8.450  | -0.842 | 1.00 | 0.00 | H |
| ATOM | 26 | OG1  | THR | N | 2  | -6.308 | 7.424  | -0.182 | 1.00 | 0.00 | O |
| ATOM | 27 | CG2  | THR | N | 2  | -6.186 | 8.601  | -2.355 | 1.00 | 0.00 | C |
| ATOM | 28 | H    | CYS | N | 3  | -2.498 | 7.387  | -2.333 | 1.00 | 0.00 | H |
| ATOM | 29 | CA   | CYS | N | 3  | -1.096 | 6.499  | -1.020 | 1.00 | 0.00 | C |
| ATOM | 30 | HG1  | THR | N | 2  | -7.255 | 7.613  | -0.399 | 1.00 | 0.00 | H |
| ATOM | 31 | HG21 | THR | N | 2  | -6.673 | 9.485  | -1.933 | 1.00 | 0.00 | H |
| ATOM | 32 | HG22 | THR | N | 2  | -5.458 | 8.940  | -3.103 | 1.00 | 0.00 | H |
| ATOM | 33 | HG23 | THR | N | 2  | -6.945 | 7.987  | -2.859 | 1.00 | 0.00 | H |
| ATOM | 34 | HA   | CYS | N | 3  | -1.166 | 5.864  | -0.130 | 1.00 | 0.00 | H |
| ATOM | 35 | C    | CYS | N | 3  | -0.480 | 7.871  | -0.707 | 1.00 | 0.00 | C |
| ATOM | 36 | CB   | CYS | N | 3  | -0.187 | 5.827  | -2.071 | 1.00 | 0.00 | C |
| ATOM | 37 | O    | CYS | N | 3  | -0.670 | 8.807  | -1.499 | 1.00 | 0.00 | O |
| ATOM | 38 | N    | CYS | N | 4  | 0.301  | 7.984  | 0.376  | 1.00 | 0.00 | N |
| ATOM | 39 | HB1  | CYS | N | 3  | 0.780  | 5.578  | -1.615 | 1.00 | 0.00 | H |
| ATOM | 40 | HB2  | CYS | N | 3  | -0.008 | 6.522  | -2.903 | 1.00 | 0.00 | H |
| ATOM | 41 | SG   | CYS | N | 3  | -0.874 | 4.341  | -2.889 | 1.00 | 0.00 | S |
| ATOM | 42 | H    | CYS | N | 4  | 0.398  | 7.221  | 1.058  | 1.00 | 0.00 | H |
| ATOM | 43 | CA   | CYS | N | 4  | 0.852  | 9.279  | 0.732  | 1.00 | 0.00 | C |
| ATOM | 44 | SG   | CYS | N | 40 | -0.642 | 2.875  | -1.434 | 1.00 | 0.00 | S |
| ATOM | 45 | HA   | CYS | N | 4  | 0.601  | 9.947  | -0.096 | 1.00 | 0.00 | H |
| ATOM | 46 | C    | CYS | N | 4  | 2.372  | 9.194  | 0.862  | 1.00 | 0.00 | C |
| ATOM | 47 | CB   | CYS | N | 4  | 0.216  | 9.836  | 2.014  | 1.00 | 0.00 | C |
| ATOM | 48 | CB   | CYS | N | 40 | 1.140  | 2.454  | -1.626 | 1.00 | 0.00 | C |
| ATOM | 49 | O    | CYS | N | 4  | 2.923  | 8.200  | 1.355  | 1.00 | 0.00 | O |
| ATOM | 50 | N    | PRO | N | 5  | 3.069  | 10.269 | 0.445  | 1.00 | 0.00 | N |
| ATOM | 51 | HB1  | CYS | N | 4  | 0.237  | 9.091  | 2.821  | 1.00 | 0.00 | H |
| ATOM | 52 | HB2  | CYS | N | 4  | 0.749  | 10.721 | 2.386  | 1.00 | 0.00 | H |
| ATOM | 53 | SG   | CYS | N | 4  | -1.556 | 10.271 | 1.813  | 1.00 | 0.00 | S |
| ATOM | 54 | HB1  | CYS | N | 40 | 1.750  | 3.364  | -1.567 | 1.00 | 0.00 | H |
| ATOM | 55 | HB2  | CYS | N | 40 | 1.385  | 1.850  | -0.739 | 1.00 | 0.00 | H |
| ATOM | 56 | CA   | CYS | N | 40 | 1.438  | 1.661  | -2.901 | 1.00 | 0.00 | C |
| ATOM | 57 | CA   | PRO | N | 5  | 4.542  | 10.265 | 0.469  | 1.00 | 0.00 | C |
| ATOM | 58 | CD   | PRO | N | 5  | 2.525  | 11.485 | -0.212 | 1.00 | 0.00 | C |
| ATOM | 59 | SG   | CYS | N | 32 | -1.485 | 12.169 | 0.957  | 1.00 | 0.00 | S |
| ATOM | 60 | HA   | CYS | N | 40 | 1.092  | 2.219  | -3.781 | 1.00 | 0.00 | H |
| ATOM | 61 | N    | CYS | N | 40 | 0.748  | 0.396  | -2.846 | 1.00 | 0.00 | N |
| ATOM | 62 | C    | CYS | N | 40 | 2.953  | 1.422  | -2.997 | 1.00 | 0.00 | C |
| ATOM | 63 | HA   | PRO | N | 5  | 4.937  | 9.295  | 0.150  | 1.00 | 0.00 | H |
| ATOM | 64 | C    | PRO | N | 5  | 5.129  | 10.510 | 1.855  | 1.00 | 0.00 | C |
| ATOM | 65 | CB   | PRO | N | 5  | 4.899  | 11.385 | -0.516 | 1.00 | 0.00 | C |
| ATOM | 66 | HD1  | PRO | N | 5  | 1.732  | 11.945 | 0.393  | 1.00 | 0.00 | H |
| ATOM | 67 | HD2  | PRO | N | 5  | 2.109  | 11.221 | -1.193 | 1.00 | 0.00 | H |
| ATOM | 68 | CG   | PRO | N | 5  | 3.751  | 12.381 | -0.362 | 1.00 | 0.00 | C |

|      |     |      |     |   |    |        |        |        |      |      |   |
|------|-----|------|-----|---|----|--------|--------|--------|------|------|---|
| ATOM | 69  | CB   | CYS | N | 32 | -1.904 | 11.894 | -0.820 | 1.00 | 0.00 | C |
| ATOM | 70  | H    | CYS | N | 40 | 0.330  | 0.114  | -1.950 | 1.00 | 0.00 | H |
| ATOM | 71  | C    | THR | N | 39 | 0.635  | -0.424 | -3.898 | 1.00 | 0.00 | C |
| ATOM | 72  | O    | CYS | N | 40 | 3.483  | 0.489  | -2.371 | 1.00 | 0.00 | O |
| ATOM | 73  | N    | PRO | N | 41 | 3.664  | 2.274  | -3.748 | 1.00 | 0.00 | N |
| ATOM | 74  | O    | PRO | N | 5  | 6.340  | 10.314 | 2.052  | 1.00 | 0.00 | O |
| ATOM | 75  | N    | SER | N | 6  | 4.293  | 10.984 | 2.790  | 1.00 | 0.00 | N |
| ATOM | 76  | HB1  | PRO | N | 5  | 5.886  | 11.812 | -0.322 | 1.00 | 0.00 | H |
| ATOM | 77  | HB2  | PRO | N | 5  | 4.896  | 10.967 | -1.528 | 1.00 | 0.00 | H |
| ATOM | 78  | HG1  | PRO | N | 5  | 3.660  | 13.066 | -1.211 | 1.00 | 0.00 | H |
| ATOM | 79  | HG2  | PRO | N | 5  | 3.875  | 13.000 | 0.532  | 1.00 | 0.00 | H |
| ATOM | 80  | HB1  | CYS | N | 32 | -2.298 | 10.875 | -0.909 | 1.00 | 0.00 | H |
| ATOM | 81  | HB2  | CYS | N | 32 | -2.728 | 12.589 | -1.040 | 1.00 | 0.00 | H |
| ATOM | 82  | CA   | CYS | N | 32 | -0.751 | 12.100 | -1.810 | 1.00 | 0.00 | C |
| ATOM | 83  | O    | THR | N | 39 | 1.085  | -0.168 | -5.027 | 1.00 | 0.00 | O |
| ATOM | 84  | CA   | THR | N | 39 | -0.173 | -1.683 | -3.597 | 1.00 | 0.00 | C |
| ATOM | 85  | CA   | PRO | N | 41 | 5.115  | 2.137  | -3.847 | 1.00 | 0.00 | C |
| ATOM | 86  | CD   | PRO | N | 41 | 3.158  | 3.448  | -4.489 | 1.00 | 0.00 | C |
| ATOM | 87  | H    | SER | N | 6  | 3.301  | 11.068 | 2.595  | 1.00 | 0.00 | H |
| ATOM | 88  | CA   | SER | N | 6  | 4.687  | 11.130 | 4.171  | 1.00 | 0.00 | C |
| ATOM | 89  | HA   | CYS | N | 32 | 0.045  | 11.376 | -1.595 | 1.00 | 0.00 | H |
| ATOM | 90  | N    | CYS | N | 32 | -0.218 | 13.450 | -1.719 | 1.00 | 0.00 | N |
| ATOM | 91  | C    | CYS | N | 32 | -1.226 | 11.808 | -3.261 | 1.00 | 0.00 | C |
| ATOM | 92  | HA   | THR | N | 39 | -0.205 | -1.856 | -2.515 | 1.00 | 0.00 | H |
| ATOM | 93  | N    | THR | N | 39 | -1.542 | -1.407 | -4.008 | 1.00 | 0.00 | N |
| ATOM | 94  | CB   | THR | N | 39 | 0.380  | -2.962 | -4.254 | 1.00 | 0.00 | C |
| ATOM | 95  | HA   | PRO | N | 41 | 5.384  | 1.092  | -4.042 | 1.00 | 0.00 | H |
| ATOM | 96  | C    | PRO | N | 41 | 5.784  | 2.584  | -2.534 | 1.00 | 0.00 | C |
| ATOM | 97  | CB   | PRO | N | 41 | 5.470  | 3.072  | -5.023 | 1.00 | 0.00 | C |
| ATOM | 98  | HD1  | PRO | N | 41 | 2.491  | 4.056  | -3.862 | 1.00 | 0.00 | H |
| ATOM | 99  | HD2  | PRO | N | 41 | 2.591  | 3.116  | -5.375 | 1.00 | 0.00 | H |
| ATOM | 100 | CG   | PRO | N | 41 | 4.433  | 4.190  | -4.889 | 1.00 | 0.00 | C |
| ATOM | 101 | HA   | SER | N | 6  | 5.405  | 10.334 | 4.399  | 1.00 | 0.00 | H |
| ATOM | 102 | C    | SER | N | 6  | 3.462  | 10.940 | 5.051  | 1.00 | 0.00 | C |
| ATOM | 103 | CB   | SER | N | 6  | 5.355  | 12.466 | 4.469  | 1.00 | 0.00 | C |
| ATOM | 104 | H    | CYS | N | 32 | -0.796 | 14.164 | -1.262 | 1.00 | 0.00 | H |
| ATOM | 105 | C    | GLY | N | 31 | 0.864  | 13.846 | -2.414 | 1.00 | 0.00 | C |
| ATOM | 106 | O    | CYS | N | 32 | -1.251 | 12.708 | -4.103 | 1.00 | 0.00 | O |
| ATOM | 107 | N    | ILE | N | 33 | -1.604 | 10.542 | -3.520 | 1.00 | 0.00 | N |
| ATOM | 108 | H    | THR | N | 39 | -1.698 | -1.126 | -4.975 | 1.00 | 0.00 | H |
| ATOM | 109 | C    | ALA | N | 38 | -2.607 | -1.567 | -3.195 | 1.00 | 0.00 | C |
| ATOM | 110 | HB   | THR | N | 39 | 0.385  | -2.849 | -5.346 | 1.00 | 0.00 | H |
| ATOM | 111 | OG1  | THR | N | 39 | -0.477 | -4.040 | -3.891 | 1.00 | 0.00 | O |
| ATOM | 112 | CG2  | THR | N | 39 | 1.789  | -3.294 | -3.800 | 1.00 | 0.00 | C |
| ATOM | 113 | O    | PRO | N | 41 | 5.201  | 3.290  | -1.702 | 1.00 | 0.00 | O |
| ATOM | 114 | N    | GLY | N | 42 | 7.078  | 2.214  | -2.408 | 1.00 | 0.00 | N |
| ATOM | 115 | HB1  | PRO | N | 41 | 6.498  | 3.450  | -4.994 | 1.00 | 0.00 | H |
| ATOM | 116 | HB2  | PRO | N | 41 | 5.338  | 2.531  | -5.974 | 1.00 | 0.00 | H |
| ATOM | 117 | HG1  | PRO | N | 41 | 4.292  | 4.757  | -5.812 | 1.00 | 0.00 | H |
| ATOM | 118 | HG2  | PRO | N | 41 | 4.742  | 4.878  | -4.093 | 1.00 | 0.00 | H |
| ATOM | 119 | O    | SER | N | 6  | 2.306  | 11.046 | 4.605  | 1.00 | 0.00 | O |
| ATOM | 120 | N    | ILE | N | 7  | 3.758  | 10.679 | 6.329  | 1.00 | 0.00 | N |
| ATOM | 121 | HB1  | SER | N | 6  | 5.848  | 12.406 | 5.443  | 1.00 | 0.00 | H |
| ATOM | 122 | HB2  | SER | N | 6  | 6.142  | 12.621 | 3.724  | 1.00 | 0.00 | H |
| ATOM | 123 | OG   | SER | N | 6  | 4.405  | 13.524 | 4.450  | 1.00 | 0.00 | O |
| ATOM | 124 | O    | GLY | N | 31 | 1.598  | 13.050 | -3.028 | 1.00 | 0.00 | O |
| ATOM | 125 | CA   | GLY | N | 31 | 1.204  | 15.338 | -2.451 | 1.00 | 0.00 | C |
| ATOM | 126 | H    | ILE | N | 33 | -1.442 | 9.819  | -2.814 | 1.00 | 0.00 | H |
| ATOM | 127 | CA   | ILE | N | 33 | -1.872 | 10.088 | -4.879 | 1.00 | 0.00 | C |
| ATOM | 128 | O    | ALA | N | 38 | -2.518 | -1.960 | -2.022 | 1.00 | 0.00 | O |
| ATOM | 129 | CA   | ALA | N | 38 | -3.968 | -1.174 | -3.802 | 1.00 | 0.00 | C |
| ATOM | 130 | HG1  | THR | N | 39 | -1.353 | -3.907 | -4.321 | 1.00 | 0.00 | H |
| ATOM | 131 | HG21 | THR | N | 39 | 2.490  | -2.506 | -4.108 | 1.00 | 0.00 | H |



|      |     |      |     |   |    |        |        |        |      |      |   |
|------|-----|------|-----|---|----|--------|--------|--------|------|------|---|
| ATOM | 132 | HG22 | THR | N | 39 | 2.109  | -4.233 | -4.270 | 1.00 | 0.00 | H |
| ATOM | 133 | HG23 | THR | N | 39 | 1.834  | -3.386 | -2.704 | 1.00 | 0.00 | H |
| ATOM | 134 | H    | GLY | N | 42 | 7.484  | 1.614  | -3.131 | 1.00 | 0.00 | H |
| ATOM | 135 | CA   | GLY | N | 42 | 7.853  | 2.541  | -1.224 | 1.00 | 0.00 | C |
| ATOM | 136 | H    | ILE | N | 7  | 4.750  | 10.596 | 6.595  | 1.00 | 0.00 | H |
| ATOM | 137 | CA   | ILE | N | 7  | 2.749  | 10.553 | 7.363  | 1.00 | 0.00 | C |
| ATOM | 138 | H    | SER | N | 6  | 4.823  | 14.251 | 4.957  | 1.00 | 0.00 | H |
| ATOM | 139 | HA1  | GLY | N | 31 | 1.359  | 15.576 | -3.512 | 1.00 | 0.00 | H |
| ATOM | 140 | HA2  | GLY | N | 31 | 2.160  | 15.482 | -1.926 | 1.00 | 0.00 | H |
| ATOM | 141 | N    | GLY | N | 31 | 0.196  | 16.216 | -1.904 | 1.00 | 0.00 | N |
| ATOM | 142 | HA   | ILE | N | 33 | -2.189 | 10.960 | -5.464 | 1.00 | 0.00 | H |
| ATOM | 143 | C    | ILE | N | 33 | -2.985 | 9.049  | -4.861 | 1.00 | 0.00 | C |
| ATOM | 144 | CB   | ILE | N | 33 | -0.598 | 9.504  | -5.576 | 1.00 | 0.00 | C |
| ATOM | 145 | HA   | ALA | N | 38 | -4.101 | -0.107 | -3.566 | 1.00 | 0.00 | H |
| ATOM | 146 | N    | ALA | N | 38 | -3.916 | -1.278 | -5.257 | 1.00 | 0.00 | N |
| ATOM | 147 | CB   | ALA | N | 38 | -5.113 | -1.972 | -3.178 | 1.00 | 0.00 | C |
| ATOM | 148 | HA1  | GLY | N | 42 | 8.828  | 2.040  | -1.306 | 1.00 | 0.00 | H |
| ATOM | 149 | HA2  | GLY | N | 42 | 7.376  | 2.139  | -0.319 | 1.00 | 0.00 | H |
| ATOM | 150 | C    | GLY | N | 42 | 8.110  | 4.028  | -0.984 | 1.00 | 0.00 | C |
| ATOM | 151 | HA   | ILE | N | 7  | 2.005  | 9.801  | 7.058  | 1.00 | 0.00 | H |
| ATOM | 152 | C    | ILE | N | 7  | 1.929  | 11.841 | 7.524  | 1.00 | 0.00 | C |
| ATOM | 153 | CB   | ILE | N | 7  | 3.420  | 10.115 | 8.679  | 1.00 | 0.00 | C |
| ATOM | 154 | H    | GLY | N | 31 | -0.621 | 16.403 | -2.490 | 1.00 | 0.00 | H |
| ATOM | 155 | C    | THR | N | 30 | 0.193  | 16.648 | -0.633 | 1.00 | 0.00 | C |
| ATOM | 156 | O    | ILE | N | 33 | -3.104 | 8.253  | -3.912 | 1.00 | 0.00 | O |
| ATOM | 157 | N    | ILE | N | 34 | -3.750 | 9.001  | -5.965 | 1.00 | 0.00 | N |
| ATOM | 158 | HB   | ILE | N | 33 | -0.903 | 9.302  | -6.613 | 1.00 | 0.00 | H |
| ATOM | 159 | CG2  | ILE | N | 33 | 0.488  | 10.578 | -5.598 | 1.00 | 0.00 | C |
| ATOM | 160 | CG1  | ILE | N | 33 | -0.105 | 8.178  | -4.961 | 1.00 | 0.00 | C |
| ATOM | 161 | H    | ALA | N | 38 | -3.570 | -2.190 | -5.588 | 1.00 | 0.00 | H |
| ATOM | 162 | C    | GLY | N | 37 | -4.464 | -0.382 | -6.101 | 1.00 | 0.00 | C |
| ATOM | 163 | HB1  | ALA | N | 38 | -6.075 | -1.600 | -3.555 | 1.00 | 0.00 | H |
| ATOM | 164 | HB2  | ALA | N | 38 | -5.098 | -1.860 | -2.086 | 1.00 | 0.00 | H |
| ATOM | 165 | HB3  | ALA | N | 38 | -5.014 | -3.041 | -3.416 | 1.00 | 0.00 | H |
| ATOM | 166 | O    | GLY | N | 42 | 8.478  | 4.392  | 0.142  | 1.00 | 0.00 | O |
| ATOM | 167 | N    | ASP | N | 43 | 7.932  | 4.869  | -2.026 | 1.00 | 0.00 | N |
| ATOM | 168 | O    | ILE | N | 7  | 0.693  | 11.766 | 7.610  | 1.00 | 0.00 | O |
| ATOM | 169 | N    | VAL | N | 8  | 2.591  | 13.008 | 7.578  | 1.00 | 0.00 | N |
| ATOM | 170 | HB   | ILE | N | 7  | 4.225  | 10.841 | 8.892  | 1.00 | 0.00 | H |
| ATOM | 171 | CG2  | ILE | N | 7  | 2.427  | 10.182 | 9.831  | 1.00 | 0.00 | C |
| ATOM | 172 | CG1  | ILE | N | 7  | 4.073  | 8.727  | 8.535  | 1.00 | 0.00 | C |
| ATOM | 173 | O    | THR | N | 30 | 1.108  | 16.437 | 0.182  | 1.00 | 0.00 | O |
| ATOM | 174 | CA   | THR | N | 30 | -1.074 | 17.314 | -0.118 | 1.00 | 0.00 | C |
| ATOM | 175 | H    | ILE | N | 34 | -3.692 | 9.750  | -6.668 | 1.00 | 0.00 | H |
| ATOM | 176 | CA   | ILE | N | 34 | -4.645 | 7.891  | -6.245 | 1.00 | 0.00 | C |
| ATOM | 177 | HG21 | ILE | N | 33 | 1.419  | 10.176 | -5.992 | 1.00 | 0.00 | H |
| ATOM | 178 | HG22 | ILE | N | 33 | 0.715  | 10.953 | -4.594 | 1.00 | 0.00 | H |
| ATOM | 179 | HG23 | ILE | N | 33 | 0.187  | 11.431 | -6.221 | 1.00 | 0.00 | H |
| ATOM | 180 | HG11 | ILE | N | 33 | -0.950 | 7.473  | -4.901 | 1.00 | 0.00 | H |
| ATOM | 181 | HG12 | ILE | N | 33 | 0.214  | 8.359  | -3.921 | 1.00 | 0.00 | H |
| ATOM | 182 | CD1  | ILE | N | 33 | 1.034  | 7.500  | -5.733 | 1.00 | 0.00 | C |
| ATOM | 183 | O    | GLY | N | 37 | -5.052 | 0.640  | -5.725 | 1.00 | 0.00 | O |
| ATOM | 184 | CA   | GLY | N | 37 | -4.301 | -0.686 | -7.601 | 1.00 | 0.00 | C |
| ATOM | 185 | H    | ASP | N | 43 | 7.652  | 4.524  | -2.943 | 1.00 | 0.00 | H |
| ATOM | 186 | CA   | ASP | N | 43 | 8.021  | 6.314  | -1.910 | 1.00 | 0.00 | C |
| ATOM | 187 | H    | VAL | N | 8  | 3.620  | 13.011 | 7.607  | 1.00 | 0.00 | H |
| ATOM | 188 | CA   | VAL | N | 8  | 1.842  | 14.254 | 7.709  | 1.00 | 0.00 | C |
| ATOM | 189 | HG21 | ILE | N | 7  | 2.909  | 9.876  | 10.766 | 1.00 | 0.00 | H |
| ATOM | 190 | HG22 | ILE | N | 7  | 2.056  | 11.203 | 9.985  | 1.00 | 0.00 | H |
| ATOM | 191 | HG23 | ILE | N | 7  | 1.555  | 9.531  | 9.656  | 1.00 | 0.00 | H |
| ATOM | 192 | HG11 | ILE | N | 7  | 4.743  | 8.724  | 7.663  | 1.00 | 0.00 | H |
| ATOM | 193 | HG12 | ILE | N | 7  | 3.292  | 7.974  | 8.320  | 1.00 | 0.00 | H |
| ATOM | 194 | CD1  | ILE | N | 7  | 4.876  | 8.325  | 9.766  | 1.00 | 0.00 | C |

|      |     |      |     |   |    |        |        |        |      |      |   |
|------|-----|------|-----|---|----|--------|--------|--------|------|------|---|
| ATOM | 195 | HA   | THR | N | 30 | -0.740 | 18.152 | 0.510  | 1.00 | 0.00 | H |
| ATOM | 196 | N    | THR | N | 30 | -1.967 | 17.834 | -1.133 | 1.00 | 0.00 | N |
| ATOM | 197 | CB   | THR | N | 30 | -1.768 | 16.253 | 0.782  | 1.00 | 0.00 | C |
| ATOM | 198 | HA   | ILE | N | 34 | -4.852 | 7.380  | -5.299 | 1.00 | 0.00 | H |
| ATOM | 199 | C    | ILE | N | 34 | -3.966 | 6.923  | -7.215 | 1.00 | 0.00 | C |
| ATOM | 200 | CB   | ILE | N | 34 | -5.974 | 8.340  | -6.910 | 1.00 | 0.00 | C |
| ATOM | 201 | HD11 | ILE | N | 33 | 1.966  | 8.080  | -5.690 | 1.00 | 0.00 | H |
| ATOM | 202 | HD12 | ILE | N | 33 | 0.757  | 7.356  | -6.790 | 1.00 | 0.00 | H |
| ATOM | 203 | HD13 | ILE | N | 33 | 1.255  | 6.510  | -5.302 | 1.00 | 0.00 | H |
| ATOM | 204 | HA1  | GLY | N | 37 | -3.258 | -0.967 | -7.806 | 1.00 | 0.00 | H |
| ATOM | 205 | HA2  | GLY | N | 37 | -4.950 | -1.540 | -7.851 | 1.00 | 0.00 | H |
| ATOM | 206 | N    | GLY | N | 37 | -4.657 | 0.445  | -8.410 | 1.00 | 0.00 | N |
| ATOM | 207 | HA   | ASP | N | 43 | 8.591  | 6.521  | -0.997 | 1.00 | 0.00 | H |
| ATOM | 208 | CB   | ASP | N | 43 | 8.797  | 6.931  | -3.078 | 1.00 | 0.00 | C |
| ATOM | 209 | C    | ASP | N | 43 | 6.660  | 6.985  | -1.651 | 1.00 | 0.00 | C |
| ATOM | 210 | HA   | VAL | N | 8  | 0.988  | 14.045 | 8.366  | 1.00 | 0.00 | H |
| ATOM | 211 | C    | VAL | N | 8  | 1.161  | 14.658 | 6.399  | 1.00 | 0.00 | C |
| ATOM | 212 | CB   | VAL | N | 8  | 2.688  | 15.352 | 8.395  | 1.00 | 0.00 | C |
| ATOM | 213 | HD11 | ILE | N | 7  | 5.485  | 7.432  | 9.593  | 1.00 | 0.00 | H |
| ATOM | 214 | HD12 | ILE | N | 7  | 5.554  | 9.137  | 10.060 | 1.00 | 0.00 | H |
| ATOM | 215 | HD13 | ILE | N | 7  | 4.233  | 8.115  | 10.631 | 1.00 | 0.00 | H |
| ATOM | 216 | H    | THR | N | 30 | -2.764 | 17.265 | -1.418 | 1.00 | 0.00 | H |
| ATOM | 217 | C    | TYR | N | 29 | -1.931 | 19.143 | -1.521 | 1.00 | 0.00 | C |
| ATOM | 218 | HB   | THR | N | 30 | -1.025 | 15.920 | 1.515  | 1.00 | 0.00 | H |
| ATOM | 219 | OG1  | THR | N | 30 | -2.093 | 15.082 | 0.014  | 1.00 | 0.00 | O |
| ATOM | 220 | CG2  | THR | N | 30 | -2.962 | 16.813 | 1.537  | 1.00 | 0.00 | C |
| ATOM | 221 | O    | ILE | N | 34 | -3.439 | 7.348  | -8.272 | 1.00 | 0.00 | O |
| ATOM | 222 | N    | ILE | N | 35 | -4.076 | 5.628  | -6.918 | 1.00 | 0.00 | N |
| ATOM | 223 | HB   | ILE | N | 34 | -5.696 | 8.781  | -7.880 | 1.00 | 0.00 | H |
| ATOM | 224 | CG1  | ILE | N | 34 | -6.712 | 9.425  | -6.109 | 1.00 | 0.00 | C |
| ATOM | 225 | CG2  | ILE | N | 34 | -6.902 | 7.140  | -7.162 | 1.00 | 0.00 | C |
| ATOM | 226 | H    | GLY | N | 37 | -3.894 | 1.057  | -8.712 | 1.00 | 0.00 | H |
| ATOM | 227 | C    | PRO | N | 36 | -5.947 | 0.722  | -8.706 | 1.00 | 0.00 | C |
| ATOM | 228 | HB1  | ASP | N | 43 | 8.832  | 8.024  | -2.981 | 1.00 | 0.00 | H |
| ATOM | 229 | HB2  | ASP | N | 43 | 9.845  | 6.600  | -3.012 | 1.00 | 0.00 | H |
| ATOM | 230 | CG   | ASP | N | 43 | 8.287  | 6.619  | -4.491 | 1.00 | 0.00 | C |
| ATOM | 231 | O    | ASP | N | 43 | 6.610  | 8.212  | -1.434 | 1.00 | 0.00 | O |
| ATOM | 232 | N    | TYR | N | 44 | 5.578  | 6.195  | -1.608 | 1.00 | 0.00 | N |
| ATOM | 233 | O    | VAL | N | 8  | 0.096  | 15.290 | 6.456  | 1.00 | 0.00 | O |
| ATOM | 234 | N    | ALA | N | 9  | 1.682  | 14.253 | 5.226  | 1.00 | 0.00 | N |
| ATOM | 235 | HB   | VAL | N | 8  | 3.710  | 15.279 | 7.985  | 1.00 | 0.00 | H |
| ATOM | 236 | CG1  | VAL | N | 8  | 2.192  | 16.774 | 8.116  | 1.00 | 0.00 | C |
| ATOM | 237 | CG2  | VAL | N | 8  | 2.724  | 15.040 | 9.898  | 1.00 | 0.00 | C |
| ATOM | 238 | O    | TYR | N | 29 | -1.020 | 19.905 | -1.220 | 1.00 | 0.00 | O |
| ATOM | 239 | CA   | TYR | N | 29 | -3.167 | 19.609 | -2.319 | 1.00 | 0.00 | C |
| ATOM | 240 | HG1  | THR | N | 30 | -2.898 | 15.278 | -0.517 | 1.00 | 0.00 | H |
| ATOM | 241 | HG21 | THR | N | 30 | -3.291 | 16.082 | 2.277  | 1.00 | 0.00 | H |
| ATOM | 242 | HG22 | THR | N | 30 | -3.803 | 17.053 | 0.872  | 1.00 | 0.00 | H |
| ATOM | 243 | HG23 | THR | N | 30 | -2.662 | 17.721 | 2.080  | 1.00 | 0.00 | H |
| ATOM | 244 | H    | ILE | N | 35 | -4.547 | 5.369  | -6.045 | 1.00 | 0.00 | H |
| ATOM | 245 | CA   | ILE | N | 35 | -3.750 | 4.570  | -7.857 | 1.00 | 0.00 | C |
| ATOM | 246 | HG11 | ILE | N | 34 | -5.988 | 10.089 | -5.613 | 1.00 | 0.00 | H |
| ATOM | 247 | HG12 | ILE | N | 34 | -7.308 | 8.952  | -5.311 | 1.00 | 0.00 | H |
| ATOM | 248 | CD1  | ILE | N | 34 | -7.613 | 10.260 | -7.012 | 1.00 | 0.00 | C |
| ATOM | 249 | HG21 | ILE | N | 34 | -7.865 | 7.480  | -7.568 | 1.00 | 0.00 | H |
| ATOM | 250 | HG22 | ILE | N | 34 | -7.114 | 6.606  | -6.225 | 1.00 | 0.00 | H |
| ATOM | 251 | HG23 | ILE | N | 34 | -6.483 | 6.402  | -7.864 | 1.00 | 0.00 | H |
| ATOM | 252 | O    | PRO | N | 36 | -6.884 | -0.044 | -8.480 | 1.00 | 0.00 | O |
| ATOM | 253 | CA   | PRO | N | 36 | -6.239 | 2.078  | -9.379 | 1.00 | 0.00 | C |
| ATOM | 254 | OD2  | ASP | N | 43 | 7.283  | 5.863  | -4.631 | 1.00 | 0.00 | O |
| ATOM | 255 | OD1  | ASP | N | 43 | 8.940  | 7.166  | -5.429 | 1.00 | 0.00 | O |
| ATOM | 256 | H    | TYR | N | 44 | 5.689  | 5.188  | -1.744 | 1.00 | 0.00 | H |
| ATOM | 257 | CA   | TYR | N | 44 | 4.260  | 6.646  | -1.176 | 1.00 | 0.00 | C |

|      |     |      |     |   |    |        |        |         |      |      |   |
|------|-----|------|-----|---|----|--------|--------|---------|------|------|---|
| ATOM | 258 | H    | ALA | N | 9  | 2.572  | 13.755 | 5.179   | 1.00 | 0.00 | H |
| ATOM | 259 | CA   | ALA | N | 9  | 0.878  | 14.396 | 4.014   | 1.00 | 0.00 | C |
| ATOM | 260 | HG11 | VAL | N | 8  | 2.813  | 17.499 | 8.658   | 1.00 | 0.00 | H |
| ATOM | 261 | HG12 | VAL | N | 8  | 2.252  | 17.028 | 7.048   | 1.00 | 0.00 | H |
| ATOM | 262 | HG13 | VAL | N | 8  | 1.146  | 16.926 | 8.424   | 1.00 | 0.00 | H |
| ATOM | 263 | HG21 | VAL | N | 8  | 3.291  | 15.802 | 10.443  | 1.00 | 0.00 | H |
| ATOM | 264 | HG22 | VAL | N | 8  | 3.189  | 14.063 | 10.102  | 1.00 | 0.00 | H |
| ATOM | 265 | HG23 | VAL | N | 8  | 1.707  | 15.020 | 10.318  | 1.00 | 0.00 | H |
| ATOM | 266 | HA   | TYR | N | 29 | -2.913 | 20.618 | -2.673  | 1.00 | 0.00 | H |
| ATOM | 267 | N    | TYR | N | 29 | -3.413 | 18.734 | -3.464  | 1.00 | 0.00 | N |
| ATOM | 268 | CB   | TYR | N | 29 | -4.430 | 19.663 | -1.425  | 1.00 | 0.00 | C |
| ATOM | 269 | HA   | ILE | N | 35 | -3.516 | 5.062  | -8.807  | 1.00 | 0.00 | H |
| ATOM | 270 | C    | ILE | N | 35 | -4.994 | 3.686  | -8.026  | 1.00 | 0.00 | C |
| ATOM | 271 | CB   | ILE | N | 35 | -2.496 | 3.752  | -7.430  | 1.00 | 0.00 | C |
| ATOM | 272 | HD11 | ILE | N | 34 | -8.249 | 10.922 | -6.422  | 1.00 | 0.00 | H |
| ATOM | 273 | HD12 | ILE | N | 34 | -7.011 | 10.871 | -7.702  | 1.00 | 0.00 | H |
| ATOM | 274 | HD13 | ILE | N | 34 | -8.295 | 9.642  | -7.615  | 1.00 | 0.00 | H |
| ATOM | 275 | HA   | PRO | N | 36 | -7.153 | 2.431  | -8.885  | 1.00 | 0.00 | H |
| ATOM | 276 | N    | PRO | N | 36 | -5.161 | 3.063  | -9.213  | 1.00 | 0.00 | N |
| ATOM | 277 | CB   | PRO | N | 36 | -6.412 | 1.980  | -10.907 | 1.00 | 0.00 | C |
| ATOM | 278 | HA   | TYR | N | 44 | 4.409  | 7.602  | -0.659  | 1.00 | 0.00 | H |
| ATOM | 279 | C    | TYR | N | 44 | 3.745  | 5.643  | -0.138  | 1.00 | 0.00 | C |
| ATOM | 280 | CB   | TYR | N | 44 | 3.267  | 6.867  | -2.324  | 1.00 | 0.00 | C |
| ATOM | 281 | HA   | ALA | N | 9  | 0.558  | 15.440 | 3.918   | 1.00 | 0.00 | H |
| ATOM | 282 | CB   | ALA | N | 9  | 1.660  | 14.018 | 2.758   | 1.00 | 0.00 | C |
| ATOM | 283 | C    | ALA | N | 9  | -0.436 | 13.607 | 4.171   | 1.00 | 0.00 | C |
| ATOM | 284 | H    | TYR | N | 29 | -4.321 | 18.268 | -3.540  | 1.00 | 0.00 | H |
| ATOM | 285 | C    | THR | N | 28 | -2.584 | 18.733 | -4.528  | 1.00 | 0.00 | C |
| ATOM | 286 | HB1  | TYR | N | 29 | -4.586 | 18.678 | -0.963  | 1.00 | 0.00 | H |
| ATOM | 287 | HB2  | TYR | N | 29 | -5.297 | 19.818 | -2.084  | 1.00 | 0.00 | H |
| ATOM | 288 | CG   | TYR | N | 29 | -4.393 | 20.739 | -0.365  | 1.00 | 0.00 | C |
| ATOM | 289 | O    | ILE | N | 35 | -5.793 | 3.512  | -7.091  | 1.00 | 0.00 | O |
| ATOM | 290 | HB   | ILE | N | 35 | -2.386 | 2.968  | -8.193  | 1.00 | 0.00 | H |
| ATOM | 291 | CG2  | ILE | N | 35 | -1.251 | 4.647  | -7.492  | 1.00 | 0.00 | C |
| ATOM | 292 | CG1  | ILE | N | 35 | -2.684 | 3.061  | -6.063  | 1.00 | 0.00 | C |
| ATOM | 293 | CD   | PRO | N | 36 | -4.493 | 3.406  | -10.490 | 1.00 | 0.00 | C |
| ATOM | 294 | HB1  | PRO | N | 36 | -6.745 | 0.977  | -11.206 | 1.00 | 0.00 | H |
| ATOM | 295 | HB2  | PRO | N | 36 | -7.180 | 2.702  | -11.230 | 1.00 | 0.00 | H |
| ATOM | 296 | CG   | PRO | N | 36 | -5.032 | 2.356  | -11.468 | 1.00 | 0.00 | C |
| ATOM | 297 | O    | TYR | N | 44 | 2.682  | 5.015  | -0.291  | 1.00 | 0.00 | O |
| ATOM | 298 | N    | ALA | N | 45 | 4.564  | 5.490  | 0.913   | 1.00 | 0.00 | N |
| ATOM | 299 | HB1  | TYR | N | 44 | 2.296  | 7.086  | -1.864  | 1.00 | 0.00 | H |
| ATOM | 300 | HB2  | TYR | N | 44 | 3.150  | 5.930  | -2.886  | 1.00 | 0.00 | H |
| ATOM | 301 | CG   | TYR | N | 44 | 3.669  | 8.014  | -3.211  | 1.00 | 0.00 | C |
| ATOM | 302 | HB1  | ALA | N | 9  | 2.510  | 14.699 | 2.618   | 1.00 | 0.00 | H |
| ATOM | 303 | HB2  | ALA | N | 9  | 1.010  | 14.109 | 1.877   | 1.00 | 0.00 | H |
| ATOM | 304 | HB3  | ALA | N | 9  | 2.050  | 12.993 | 2.816   | 1.00 | 0.00 | H |
| ATOM | 305 | O    | ALA | N | 9  | -1.509 | 14.115 | 3.816   | 1.00 | 0.00 | O |
| ATOM | 306 | N    | ARG | N | 10 | -0.365 | 12.374 | 4.723   | 1.00 | 0.00 | N |
| ATOM | 307 | O    | THR | N | 28 | -1.608 | 19.488 | -4.627  | 1.00 | 0.00 | O |
| ATOM | 308 | CA   | THR | N | 28 | -2.852 | 17.722 | -5.657  | 1.00 | 0.00 | C |
| ATOM | 309 | CD1  | TYR | N | 29 | -4.596 | 22.083 | -0.704  | 1.00 | 0.00 | C |
| ATOM | 310 | CD2  | TYR | N | 29 | -4.154 | 20.444 | 0.983   | 1.00 | 0.00 | C |
| ATOM | 311 | HG21 | ILE | N | 35 | -0.341 | 4.079  | -7.248  | 1.00 | 0.00 | H |
| ATOM | 312 | HG22 | ILE | N | 35 | -1.106 | 5.070  | -8.498  | 1.00 | 0.00 | H |
| ATOM | 313 | HG23 | ILE | N | 35 | -1.313 | 5.488  | -6.783  | 1.00 | 0.00 | H |
| ATOM | 314 | HG11 | ILE | N | 35 | -3.658 | 2.552  | -6.053  | 1.00 | 0.00 | H |
| ATOM | 315 | HG12 | ILE | N | 35 | -2.722 | 3.825  | -5.267  | 1.00 | 0.00 | H |
| ATOM | 316 | CD1  | ILE | N | 35 | -1.604 | 2.028  | -5.731  | 1.00 | 0.00 | C |
| ATOM | 317 | HD1  | PRO | N | 36 | -3.407 | 3.333  | -10.387 | 1.00 | 0.00 | H |
| ATOM | 318 | HD2  | PRO | N | 36 | -4.771 | 4.432  | -10.782 | 1.00 | 0.00 | H |
| ATOM | 319 | HG1  | PRO | N | 36 | -4.380 | 1.473  | -11.479 | 1.00 | 0.00 | H |
| ATOM | 320 | HG2  | PRO | N | 36 | -5.080 | 2.750  | -12.493 | 1.00 | 0.00 | H |

|      |     |      |     |   |    |        |        |        |      |      |   |
|------|-----|------|-----|---|----|--------|--------|--------|------|------|---|
| ATOM | 321 | H    | ALA | N | 45 | 5.333  | 6.170  | 1.057  | 1.00 | 0.00 | H |
| ATOM | 322 | CA   | ALA | N | 45 | 4.414  | 4.427  | 1.884  | 1.00 | 0.00 | C |
| ATOM | 323 | CD2  | TYR | N | 44 | 3.017  | 9.244  | -3.099 | 1.00 | 0.00 | C |
| ATOM | 324 | CD1  | TYR | N | 44 | 4.750  | 7.918  | -4.100 | 1.00 | 0.00 | C |
| ATOM | 325 | H    | ARG | N | 10 | 0.548  | 11.991 | 4.971  | 1.00 | 0.00 | H |
| ATOM | 326 | CA   | ARG | N | 10 | -1.562 | 11.627 | 5.095  | 1.00 | 0.00 | C |
| ATOM | 327 | HA   | THR | N | 28 | -1.844 | 17.409 | -5.959 | 1.00 | 0.00 | H |
| ATOM | 328 | N    | THR | N | 28 | -3.579 | 16.544 | -5.188 | 1.00 | 0.00 | N |
| ATOM | 329 | CB   | THR | N | 28 | -3.511 | 18.393 | -6.873 | 1.00 | 0.00 | C |
| ATOM | 330 | HD1  | TYR | N | 29 | -4.776 | 22.357 | -1.744 | 1.00 | 0.00 | H |
| ATOM | 331 | CE1  | TYR | N | 29 | -4.564 | 23.092 | 0.253  | 1.00 | 0.00 | C |
| ATOM | 332 | HD2  | TYR | N | 29 | -3.992 | 19.408 | 1.282  | 1.00 | 0.00 | H |
| ATOM | 333 | CE2  | TYR | N | 29 | -4.115 | 21.442 | 1.956  | 1.00 | 0.00 | C |
| ATOM | 334 | HD11 | ILE | N | 35 | -0.600 | 2.474  | -5.658 | 1.00 | 0.00 | H |
| ATOM | 335 | HD12 | ILE | N | 35 | -1.550 | 1.233  | -6.491 | 1.00 | 0.00 | H |
| ATOM | 336 | HD13 | ILE | N | 35 | -1.807 | 1.547  | -4.760 | 1.00 | 0.00 | H |
| ATOM | 337 | HA   | ALA | N | 45 | 4.014  | 3.551  | 1.352  | 1.00 | 0.00 | H |
| ATOM | 338 | C    | ALA | N | 45 | 3.403  | 4.750  | 2.986  | 1.00 | 0.00 | C |
| ATOM | 339 | CB   | ALA | N | 45 | 5.786  | 4.103  | 2.495  | 1.00 | 0.00 | C |
| ATOM | 340 | HD2  | TYR | N | 44 | 2.167  | 9.341  | -2.419 | 1.00 | 0.00 | H |
| ATOM | 341 | CE2  | TYR | N | 44 | 3.410  | 10.353 | -3.848 | 1.00 | 0.00 | C |
| ATOM | 342 | HD1  | TYR | N | 44 | 5.304  | 6.988  | -4.213 | 1.00 | 0.00 | H |
| ATOM | 343 | CE1  | TYR | N | 44 | 5.169  | 9.019  | -4.836 | 1.00 | 0.00 | C |
| ATOM | 344 | HA   | ARG | N | 10 | -2.195 | 11.530 | 4.206  | 1.00 | 0.00 | H |
| ATOM | 345 | C    | ARG | N | 10 | -2.434 | 12.384 | 6.105  | 1.00 | 0.00 | C |
| ATOM | 346 | CB   | ARG | N | 10 | -1.189 | 10.228 | 5.619  | 1.00 | 0.00 | C |
| ATOM | 347 | H    | THR | N | 28 | -4.569 | 16.433 | -5.421 | 1.00 | 0.00 | H |
| ATOM | 348 | C    | ALA | N | 27 | -2.962 | 15.703 | -4.337 | 1.00 | 0.00 | C |
| ATOM | 349 | HB   | THR | N | 28 | -2.907 | 19.300 | -7.062 | 1.00 | 0.00 | H |
| ATOM | 350 | OG1  | THR | N | 28 | -4.834 | 18.757 | -6.496 | 1.00 | 0.00 | O |
| ATOM | 351 | CG2  | THR | N | 28 | -3.480 | 17.526 | -8.128 | 1.00 | 0.00 | C |
| ATOM | 352 | HE1  | TYR | N | 29 | -4.710 | 24.130 | -0.038 | 1.00 | 0.00 | H |
| ATOM | 353 | CZ   | TYR | N | 29 | -4.315 | 22.782 | 1.599  | 1.00 | 0.00 | C |
| ATOM | 354 | HE2  | TYR | N | 29 | -3.919 | 21.200 | 3.002  | 1.00 | 0.00 | H |
| ATOM | 355 | O    | ALA | N | 45 | 3.039  | 3.850  | 3.778  | 1.00 | 0.00 | O |
| ATOM | 356 | N    | ASN | N | 46 | 2.986  | 6.007  | 3.080  | 1.00 | 0.00 | N |
| ATOM | 357 | HB1  | ALA | N | 45 | 5.720  | 3.248  | 3.177  | 1.00 | 0.00 | H |
| ATOM | 358 | HB2  | ALA | N | 45 | 6.506  | 3.875  | 1.698  | 1.00 | 0.00 | H |
| ATOM | 359 | HB3  | ALA | N | 45 | 6.171  | 4.968  | 3.055  | 1.00 | 0.00 | H |
| ATOM | 360 | HE2  | TYR | N | 44 | 2.874  | 11.292 | -3.742 | 1.00 | 0.00 | H |
| ATOM | 361 | CZ   | TYR | N | 44 | 4.487  | 10.238 | -4.731 | 1.00 | 0.00 | C |
| ATOM | 362 | HE1  | TYR | N | 44 | 6.036  | 8.939  | -5.490 | 1.00 | 0.00 | H |
| ATOM | 363 | O    | ARG | N | 10 | -3.672 | 12.383 | 5.963  | 1.00 | 0.00 | O |
| ATOM | 364 | N    | SER | N | 11 | -1.823 | 13.017 | 7.117  | 1.00 | 0.00 | N |
| ATOM | 365 | HB1  | ARG | N | 10 | -0.521 | 10.348 | 6.481  | 1.00 | 0.00 | H |
| ATOM | 366 | HB2  | ARG | N | 10 | -0.606 | 9.714  | 4.844  | 1.00 | 0.00 | H |
| ATOM | 367 | CG   | ARG | N | 10 | -2.387 | 9.376  | 6.054  | 1.00 | 0.00 | C |
| ATOM | 368 | O    | ALA | N | 27 | -1.766 | 15.853 | -4.029 | 1.00 | 0.00 | O |
| ATOM | 369 | CA   | ALA | N | 27 | -3.752 | 14.511 | -3.766 | 1.00 | 0.00 | C |
| ATOM | 370 | HG1  | THR | N | 28 | -5.131 | 19.467 | -7.115 | 1.00 | 0.00 | H |
| ATOM | 371 | HG21 | THR | N | 28 | -2.451 | 17.342 | -8.466 | 1.00 | 0.00 | H |
| ATOM | 372 | HG22 | THR | N | 28 | -3.986 | 18.058 | -8.945 | 1.00 | 0.00 | H |
| ATOM | 373 | HG23 | THR | N | 28 | -4.002 | 16.573 | -7.973 | 1.00 | 0.00 | H |
| ATOM | 374 | OH   | TYR | N | 29 | -4.238 | 23.733 | 2.564  | 1.00 | 0.00 | O |
| ATOM | 375 | H    | ASN | N | 46 | 3.224  | 6.689  | 2.355  | 1.00 | 0.00 | H |
| ATOM | 376 | CA   | ASN | N | 46 | 2.187  | 6.486  | 4.188  | 1.00 | 0.00 | C |
| ATOM | 377 | OH   | TYR | N | 44 | 4.912  | 11.262 | -5.521 | 1.00 | 0.00 | O |
| ATOM | 378 | H    | SER | N | 11 | -0.833 | 12.818 | 7.299  | 1.00 | 0.00 | H |
| ATOM | 379 | CA   | SER | N | 11 | -2.612 | 13.751 | 8.094  | 1.00 | 0.00 | C |
| ATOM | 380 | HG1  | ARG | N | 10 | -2.963 | 9.916  | 6.817  | 1.00 | 0.00 | H |
| ATOM | 381 | HG2  | ARG | N | 10 | -2.004 | 8.479  | 6.565  | 1.00 | 0.00 | H |
| ATOM | 382 | CD   | ARG | N | 10 | -3.355 | 8.952  | 4.953  | 1.00 | 0.00 | C |
| ATOM | 383 | HA   | ALA | N | 27 | -3.106 | 14.130 | -2.966 | 1.00 | 0.00 | H |

|      |     |      |     |   |    |        |        |        |      |      |   |
|------|-----|------|-----|---|----|--------|--------|--------|------|------|---|
| ATOM | 384 | N    | ALA | N | 27 | -5.037 | 14.924 | -3.208 | 1.00 | 0.00 | N |
| ATOM | 385 | CB   | ALA | N | 27 | -3.980 | 13.432 | -4.829 | 1.00 | 0.00 | C |
| ATOM | 386 | HH   | TYR | N | 29 | -4.426 | 24.633 | 2.172  | 1.00 | 0.00 | H |
| ATOM | 387 | HA   | ASN | N | 46 | 2.167  | 5.687  | 4.936  | 1.00 | 0.00 | H |
| ATOM | 388 | CB   | ASN | N | 46 | 2.873  | 7.713  | 4.815  | 1.00 | 0.00 | C |
| ATOM | 389 | C    | ASN | N | 46 | 0.717  | 6.734  | 3.795  | 1.00 | 0.00 | C |
| ATOM | 390 | HH   | TYR | N | 44 | 4.419  | 12.101 | -5.333 | 1.00 | 0.00 | H |
| ATOM | 391 | HA   | SER | N | 11 | -3.360 | 13.077 | 8.522  | 1.00 | 0.00 | H |
| ATOM | 392 | CB   | SER | N | 11 | -1.759 | 14.339 | 9.221  | 1.00 | 0.00 | C |
| ATOM | 393 | C    | SER | N | 11 | -3.389 | 14.885 | 7.404  | 1.00 | 0.00 | C |
| ATOM | 394 | HD1  | ARG | N | 10 | -4.258 | 8.530  | 5.407  | 1.00 | 0.00 | H |
| ATOM | 395 | HD2  | ARG | N | 10 | -3.682 | 9.813  | 4.348  | 1.00 | 0.00 | H |
| ATOM | 396 | NE   | ARG | N | 10 | -2.743 | 7.950  | 4.075  | 1.00 | 0.00 | N |
| ATOM | 397 | H    | ALA | N | 27 | -5.883 | 14.557 | -3.654 | 1.00 | 0.00 | H |
| ATOM | 398 | C    | CYS | N | 26 | -5.176 | 15.649 | -2.100 | 1.00 | 0.00 | C |
| ATOM | 399 | HB1  | ALA | N | 27 | -4.764 | 13.743 | -5.522 | 1.00 | 0.00 | H |
| ATOM | 400 | HB2  | ALA | N | 27 | -3.055 | 13.255 | -5.386 | 1.00 | 0.00 | H |
| ATOM | 401 | HB3  | ALA | N | 27 | -4.288 | 12.490 | -4.353 | 1.00 | 0.00 | H |
| ATOM | 402 | HB1  | ASN | N | 46 | 2.783  | 8.578  | 4.151  | 1.00 | 0.00 | H |
| ATOM | 403 | HB2  | ASN | N | 46 | 2.382  | 7.957  | 5.766  | 1.00 | 0.00 | H |
| ATOM | 404 | CG   | ASN | N | 46 | 4.361  | 7.444  | 5.021  | 1.00 | 0.00 | C |
| ATOM | 405 | OXT  | ASN | N | 46 | 0.008  | 7.360  | 4.630  | 1.00 | 0.00 | O |
| ATOM | 406 | O    | ASN | N | 46 | 0.302  | 6.296  | 2.681  | 1.00 | 0.00 | O |
| ATOM | 407 | HB1  | SER | N | 11 | -2.449 | 14.869 | 9.900  | 1.00 | 0.00 | H |
| ATOM | 408 | HB2  | SER | N | 11 | -1.056 | 15.080 | 8.803  | 1.00 | 0.00 | H |
| ATOM | 409 | OG   | SER | N | 11 | -1.075 | 13.305 | 9.904  | 1.00 | 0.00 | O |
| ATOM | 410 | O    | SER | N | 11 | -4.611 | 15.066 | 7.616  | 1.00 | 0.00 | O |
| ATOM | 411 | N    | ASN | N | 12 | -2.673 | 15.657 | 6.591  | 1.00 | 0.00 | N |
| ATOM | 412 | HE   | ARG | N | 10 | -1.767 | 7.674  | 4.267  | 1.00 | 0.00 | H |
| ATOM | 413 | CZ   | ARG | N | 10 | -3.288 | 7.481  | 2.948  | 1.00 | 0.00 | C |
| ATOM | 414 | O    | CYS | N | 26 | -4.225 | 15.989 | -1.367 | 1.00 | 0.00 | O |
| ATOM | 415 | CA   | CYS | N | 26 | -6.587 | 16.137 | -1.733 | 1.00 | 0.00 | C |
| ATOM | 416 | OD1  | ASN | N | 46 | 5.216  | 8.052  | 4.363  | 1.00 | 0.00 | O |
| ATOM | 417 | ND2  | ASN | N | 46 | 4.688  | 6.490  | 5.914  | 1.00 | 0.00 | N |
| ATOM | 418 | H    | SER | N | 11 | -0.639 | 13.719 | 10.691 | 1.00 | 0.00 | H |
| ATOM | 419 | H    | ASN | N | 12 | -1.664 | 15.476 | 6.492  | 1.00 | 0.00 | H |
| ATOM | 420 | CA   | ASN | N | 12 | -3.253 | 16.786 | 5.880  | 1.00 | 0.00 | C |
| ATOM | 421 | NH2  | ARG | N | 10 | -4.572 | 7.728  | 2.654  | 1.00 | 0.00 | N |
| ATOM | 422 | NH1  | ARG | N | 10 | -2.507 | 6.805  | 2.086  | 1.00 | 0.00 | N |
| ATOM | 423 | HA   | CYS | N | 26 | -6.403 | 17.141 | -1.322 | 1.00 | 0.00 | H |
| ATOM | 424 | N    | CYS | N | 26 | -7.439 | 16.256 | -2.893 | 1.00 | 0.00 | N |
| ATOM | 425 | CB   | CYS | N | 26 | -7.238 | 15.288 | -0.644 | 1.00 | 0.00 | C |
| ATOM | 426 | HD21 | ASN | N | 46 | 5.677  | 6.316  | 6.066  | 1.00 | 0.00 | H |
| ATOM | 427 | HD22 | ASN | N | 46 | 4.001  | 5.962  | 6.465  | 1.00 | 0.00 | H |
| ATOM | 428 | HA   | ASN | N | 12 | -3.753 | 17.446 | 6.600  | 1.00 | 0.00 | H |
| ATOM | 429 | CB   | ASN | N | 12 | -2.149 | 17.570 | 5.162  | 1.00 | 0.00 | C |
| ATOM | 430 | C    | ASN | N | 12 | -4.352 | 16.296 | 4.922  | 1.00 | 0.00 | C |
| ATOM | 431 | HH21 | ARG | N | 10 | -4.948 | 7.439  | 1.754  | 1.00 | 0.00 | H |
| ATOM | 432 | HH22 | ARG | N | 10 | -5.263 | 7.849  | 3.419  | 1.00 | 0.00 | H |
| ATOM | 433 | HH11 | ARG | N | 10 | -2.951 | 6.109  | 1.488  | 1.00 | 0.00 | H |
| ATOM | 434 | HH12 | ARG | N | 10 | -1.551 | 6.564  | 2.380  | 1.00 | 0.00 | H |
| ATOM | 435 | H    | CYS | N | 26 | -8.265 | 15.654 | -2.988 | 1.00 | 0.00 | H |
| ATOM | 436 | C    | LEU | N | 25 | -7.166 | 17.207 | -3.808 | 1.00 | 0.00 | C |
| ATOM | 437 | HB1  | CYS | N | 26 | -6.549 | 15.157 | 0.199  | 1.00 | 0.00 | H |
| ATOM | 438 | HB2  | CYS | N | 26 | -7.507 | 14.288 | -1.017 | 1.00 | 0.00 | H |
| ATOM | 439 | SG   | CYS | N | 26 | -8.824 | 15.999 | -0.041 | 1.00 | 0.00 | S |
| ATOM | 440 | HB1  | ASN | N | 12 | -1.598 | 16.930 | 4.457  | 1.00 | 0.00 | H |
| ATOM | 441 | HB2  | ASN | N | 12 | -2.618 | 18.370 | 4.566  | 1.00 | 0.00 | H |
| ATOM | 442 | CG   | ASN | N | 12 | -1.173 | 18.222 | 6.164  | 1.00 | 0.00 | C |
| ATOM | 443 | O    | ASN | N | 12 | -5.412 | 16.928 | 4.786  | 1.00 | 0.00 | O |
| ATOM | 444 | N    | PHE | N | 13 | -4.086 | 15.147 | 4.276  | 1.00 | 0.00 | N |
| ATOM | 445 | O    | LEU | N | 25 | -6.247 | 18.023 | -3.664 | 1.00 | 0.00 | O |
| ATOM | 446 | CA   | LEU | N | 25 | -8.055 | 17.241 | -5.051 | 1.00 | 0.00 | C |

|      |     |      |     |   |    |         |        |        |      |      |   |
|------|-----|------|-----|---|----|---------|--------|--------|------|------|---|
| ATOM | 447 | SG   | CYS | N | 16 | -8.233  | 17.870 | 0.666  | 1.00 | 0.00 | S |
| ATOM | 448 | OD1  | ASN | N | 12 | -1.437  | 18.284 | 7.364  | 1.00 | 0.00 | O |
| ATOM | 449 | ND2  | ASN | N | 12 | -0.054  | 18.735 | 5.611  | 1.00 | 0.00 | N |
| ATOM | 450 | H    | PHE | N | 13 | -3.154  | 14.725 | 4.356  | 1.00 | 0.00 | H |
| ATOM | 451 | CA   | PHE | N | 13 | -5.030  | 14.496 | 3.384  | 1.00 | 0.00 | C |
| ATOM | 452 | HA   | LEU | N | 25 | -7.437  | 17.732 | -5.812 | 1.00 | 0.00 | H |
| ATOM | 453 | N    | LEU | N | 25 | -8.385  | 15.894 | -5.520 | 1.00 | 0.00 | N |
| ATOM | 454 | CB   | LEU | N | 25 | -9.341  | 18.037 | -4.769 | 1.00 | 0.00 | C |
| ATOM | 455 | CB   | CYS | N | 16 | -7.726  | 17.511 | 2.388  | 1.00 | 0.00 | C |
| ATOM | 456 | HD21 | ASN | N | 12 | 0.160   | 18.589 | 4.627  | 1.00 | 0.00 | H |
| ATOM | 457 | HD22 | ASN | N | 12 | 0.654   | 19.136 | 6.226  | 1.00 | 0.00 | H |
| ATOM | 458 | HA   | PHE | N | 13 | -5.355  | 15.198 | 2.601  | 1.00 | 0.00 | H |
| ATOM | 459 | C    | PHE | N | 13 | -6.316  | 14.106 | 4.114  | 1.00 | 0.00 | C |
| ATOM | 460 | CB   | PHE | N | 13 | -4.330  | 13.279 | 2.745  | 1.00 | 0.00 | C |
| ATOM | 461 | H    | LEU | N | 25 | -9.241  | 15.472 | -5.156 | 1.00 | 0.00 | H |
| ATOM | 462 | C    | ALA | N | 24 | -7.446  | 15.056 | -6.000 | 1.00 | 0.00 | C |
| ATOM | 463 | HB1  | LEU | N | 25 | -10.014 | 17.388 | -4.187 | 1.00 | 0.00 | H |
| ATOM | 464 | HB2  | LEU | N | 25 | -9.088  | 18.885 | -4.110 | 1.00 | 0.00 | H |
| ATOM | 465 | CG   | LEU | N | 25 | -10.059 | 18.554 | -6.026 | 1.00 | 0.00 | C |
| ATOM | 466 | HB1  | CYS | N | 16 | -7.274  | 16.511 | 2.420  | 1.00 | 0.00 | H |
| ATOM | 467 | HB2  | CYS | N | 16 | -6.941  | 18.243 | 2.629  | 1.00 | 0.00 | H |
| ATOM | 468 | CA   | CYS | N | 16 | -8.845  | 17.605 | 3.438  | 1.00 | 0.00 | C |
| ATOM | 469 | O    | PHE | N | 13 | -7.419  | 14.385 | 3.621  | 1.00 | 0.00 | O |
| ATOM | 470 | N    | ASN | N | 14 | -6.184  | 13.446 | 5.279  | 1.00 | 0.00 | N |
| ATOM | 471 | HB1  | PHE | N | 13 | -3.514  | 13.655 | 2.116  | 1.00 | 0.00 | H |
| ATOM | 472 | HB2  | PHE | N | 13 | -3.866  | 12.704 | 3.555  | 1.00 | 0.00 | H |
| ATOM | 473 | CG   | PHE | N | 13 | -5.235  | 12.379 | 1.949  | 1.00 | 0.00 | C |
| ATOM | 474 | O    | ALA | N | 24 | -6.270  | 15.412 | -6.188 | 1.00 | 0.00 | O |
| ATOM | 475 | CA   | ALA | N | 24 | -7.901  | 13.634 | -6.379 | 1.00 | 0.00 | C |
| ATOM | 476 | HG   | LEU | N | 25 | -10.101 | 17.719 | -6.739 | 1.00 | 0.00 | H |
| ATOM | 477 | CD1  | LEU | N | 25 | -9.312  | 19.703 | -6.699 | 1.00 | 0.00 | C |
| ATOM | 478 | CD2  | LEU | N | 25 | -11.502 | 18.955 | -5.700 | 1.00 | 0.00 | C |
| ATOM | 479 | HA   | CYS | N | 16 | -9.220  | 18.636 | 3.494  | 1.00 | 0.00 | H |
| ATOM | 480 | N    | CYS | N | 16 | -8.261  | 17.203 | 4.711  | 1.00 | 0.00 | N |
| ATOM | 481 | C    | CYS | N | 16 | -10.093 | 16.760 | 3.097  | 1.00 | 0.00 | C |
| ATOM | 482 | H    | ASN | N | 14 | -5.249  | 13.195 | 5.627  | 1.00 | 0.00 | H |
| ATOM | 483 | CA   | ASN | N | 14 | -7.372  | 13.013 | 5.992  | 1.00 | 0.00 | C |
| ATOM | 484 | CD1  | PHE | N | 13 | -5.420  | 12.578 | 0.575  | 1.00 | 0.00 | C |
| ATOM | 485 | CD2  | PHE | N | 13 | -5.907  | 11.317 | 2.574  | 1.00 | 0.00 | C |
| ATOM | 486 | HA   | ALA | N | 24 | -6.978  | 13.044 | -6.436 | 1.00 | 0.00 | H |
| ATOM | 487 | N    | ALA | N | 24 | -8.771  | 13.075 | -5.350 | 1.00 | 0.00 | N |
| ATOM | 488 | CB   | ALA | N | 24 | -8.587  | 13.631 | -7.744 | 1.00 | 0.00 | C |
| ATOM | 489 | HD11 | LEU | N | 25 | -8.277  | 19.443 | -6.962 | 1.00 | 0.00 | H |
| ATOM | 490 | HD12 | LEU | N | 25 | -9.811  | 20.004 | -7.631 | 1.00 | 0.00 | H |
| ATOM | 491 | HD13 | LEU | N | 25 | -9.280  | 20.590 | -6.047 | 1.00 | 0.00 | H |
| ATOM | 492 | HD21 | LEU | N | 25 | -12.094 | 18.091 | -5.371 | 1.00 | 0.00 | H |
| ATOM | 493 | HD22 | LEU | N | 25 | -12.009 | 19.381 | -6.580 | 1.00 | 0.00 | H |
| ATOM | 494 | HD23 | LEU | N | 25 | -11.538 | 19.709 | -4.894 | 1.00 | 0.00 | H |
| ATOM | 495 | H    | CYS | N | 16 | -7.265  | 16.954 | 4.735  | 1.00 | 0.00 | H |
| ATOM | 496 | C    | VAL | N | 15 | -9.003  | 17.113 | 5.829  | 1.00 | 0.00 | C |
| ATOM | 497 | O    | CYS | N | 16 | -11.099 | 17.276 | 2.580  | 1.00 | 0.00 | O |
| ATOM | 498 | N    | ARG | N | 17 | -10.034 | 15.461 | 3.420  | 1.00 | 0.00 | N |
| ATOM | 499 | HA   | ASN | N | 14 | -8.023  | 12.466 | 5.297  | 1.00 | 0.00 | H |
| ATOM | 500 | CB   | ASN | N | 14 | -7.042  | 12.096 | 7.172  | 1.00 | 0.00 | C |
| ATOM | 501 | C    | ASN | N | 14 | -8.219  | 14.208 | 6.453  | 1.00 | 0.00 | C |
| ATOM | 502 | HD1  | PHE | N | 13 | -4.884  | 13.392 | 0.082  | 1.00 | 0.00 | H |
| ATOM | 503 | CE1  | PHE | N | 13 | -6.271  | 11.749 | -0.160 | 1.00 | 0.00 | C |
| ATOM | 504 | HD2  | PHE | N | 13 | -5.777  | 11.144 | 3.643  | 1.00 | 0.00 | H |
| ATOM | 505 | CE2  | PHE | N | 13 | -6.746  | 10.480 | 1.843  | 1.00 | 0.00 | C |
| ATOM | 506 | H    | ALA | N | 24 | -9.610  | 12.551 | -5.640 | 1.00 | 0.00 | H |
| ATOM | 507 | C    | GLU | N | 23 | -8.290  | 12.896 | -4.100 | 1.00 | 0.00 | C |
| ATOM | 508 | HB1  | ALA | N | 24 | -7.907  | 14.046 | -8.496 | 1.00 | 0.00 | H |
| ATOM | 509 | HB2  | ALA | N | 24 | -9.503  | 14.232 | -7.735 | 1.00 | 0.00 | H |

|      |     |      |     |   |    |         |        |        |      |      |   |
|------|-----|------|-----|---|----|---------|--------|--------|------|------|---|
| ATOM | 510 | HB3  | ALA | N | 24 | -8.856  | 12.609 | -8.040 | 1.00 | 0.00 | H |
| ATOM | 511 | O    | VAL | N | 15 | -10.198 | 17.443 | 5.864  | 1.00 | 0.00 | O |
| ATOM | 512 | CA   | VAL | N | 15 | -8.308  | 16.569 | 7.081  | 1.00 | 0.00 | C |
| ATOM | 513 | H    | ARG | N | 17 | -9.140  | 15.071 | 3.737  | 1.00 | 0.00 | H |
| ATOM | 514 | CA   | ARG | N | 17 | -11.127 | 14.541 | 3.168  | 1.00 | 0.00 | C |
| ATOM | 515 | HB1  | ASN | N | 14 | -6.360  | 12.573 | 7.888  | 1.00 | 0.00 | H |
| ATOM | 516 | HB2  | ASN | N | 14 | -7.986  | 11.903 | 7.707  | 1.00 | 0.00 | H |
| ATOM | 517 | CG   | ASN | N | 14 | -6.535  | 10.725 | 6.750  | 1.00 | 0.00 | C |
| ATOM | 518 | O    | ASN | N | 14 | -9.458  | 14.111 | 6.491  | 1.00 | 0.00 | O |
| ATOM | 519 | N    | VAL | N | 15 | -7.576  | 15.336 | 6.798  | 1.00 | 0.00 | N |
| ATOM | 520 | HE1  | PHE | N | 13 | -6.402  | 11.920 | -1.232 | 1.00 | 0.00 | H |
| ATOM | 521 | CZ   | PHE | N | 13 | -6.937  | 10.699 | 0.478  | 1.00 | 0.00 | C |
| ATOM | 522 | HE2  | PHE | N | 13 | -7.259  | 9.655  | 2.340  | 1.00 | 0.00 | H |
| ATOM | 523 | O    | GLU | N | 23 | -7.140  | 13.222 | -3.773 | 1.00 | 0.00 | O |
| ATOM | 524 | CA   | GLU | N | 23 | -9.216  | 12.270 | -3.056 | 1.00 | 0.00 | C |
| ATOM | 525 | HA   | VAL | N | 15 | -9.137  | 16.331 | 7.759  | 1.00 | 0.00 | H |
| ATOM | 526 | CB   | VAL | N | 15 | -7.387  | 17.607 | 7.759  | 1.00 | 0.00 | C |
| ATOM | 527 | HA   | ARG | N | 17 | -11.563 | 14.762 | 2.180  | 1.00 | 0.00 | H |
| ATOM | 528 | C    | ARG | N | 17 | -12.301 | 14.698 | 4.131  | 1.00 | 0.00 | C |
| ATOM | 529 | CB   | ARG | N | 17 | -10.605 | 13.094 | 3.213  | 1.00 | 0.00 | C |
| ATOM | 530 | OD1  | ASN | N | 14 | -6.986  | 10.175 | 5.719  | 1.00 | 0.00 | O |
| ATOM | 531 | ND2  | ASN | N | 14 | -5.666  | 10.124 | 7.561  | 1.00 | 0.00 | N |
| ATOM | 532 | H    | VAL | N | 15 | -6.554  | 15.358 | 6.770  | 1.00 | 0.00 | H |
| ATOM | 533 | HZ   | PHE | N | 13 | -7.591  | 10.033 | -0.078 | 1.00 | 0.00 | H |
| ATOM | 534 | HA   | GLU | N | 23 | -8.816  | 12.634 | -2.097 | 1.00 | 0.00 | H |
| ATOM | 535 | N    | GLU | N | 23 | -10.584 | 12.717 | -3.208 | 1.00 | 0.00 | N |
| ATOM | 536 | CB   | GLU | N | 23 | -9.095  | 10.740 | -3.100 | 1.00 | 0.00 | C |
| ATOM | 537 | HB   | VAL | N | 15 | -6.429  | 17.606 | 7.211  | 1.00 | 0.00 | H |
| ATOM | 538 | CG2  | VAL | N | 15 | -7.142  | 17.167 | 9.200  | 1.00 | 0.00 | C |
| ATOM | 539 | CG1  | VAL | N | 15 | -7.968  | 19.021 | 7.683  | 1.00 | 0.00 | C |
| ATOM | 540 | O    | ARG | N | 17 | -13.397 | 14.177 | 3.818  | 1.00 | 0.00 | O |
| ATOM | 541 | N    | LEU | N | 18 | -12.155 | 15.365 | 5.278  | 1.00 | 0.00 | N |
| ATOM | 542 | HB1  | ARG | N | 17 | -10.043 | 12.965 | 4.144  | 1.00 | 0.00 | H |
| ATOM | 543 | HB2  | ARG | N | 17 | -11.461 | 12.408 | 3.274  | 1.00 | 0.00 | H |
| ATOM | 544 | CG   | ARG | N | 17 | -9.722  | 12.725 | 2.020  | 1.00 | 0.00 | C |
| ATOM | 545 | HD21 | ASN | N | 14 | -5.413  | 9.154  | 7.366  | 1.00 | 0.00 | H |
| ATOM | 546 | HD22 | ASN | N | 14 | -5.221  | 10.582 | 8.375  | 1.00 | 0.00 | H |
| ATOM | 547 | H    | GLU | N | 23 | -11.317 | 12.009 | -3.457 | 1.00 | 0.00 | H |
| ATOM | 548 | C    | PRO | N | 22 | -10.874 | 14.021 | -3.295 | 1.00 | 0.00 | C |
| ATOM | 549 | HB1  | GLU | N | 23 | -9.497  | 10.370 | -4.050 | 1.00 | 0.00 | H |
| ATOM | 550 | HB2  | GLU | N | 23 | -8.020  | 10.514 | -3.108 | 1.00 | 0.00 | H |
| ATOM | 551 | CG   | GLU | N | 23 | -9.780  | 10.027 | -1.924 | 1.00 | 0.00 | C |
| ATOM | 552 | HG21 | VAL | N | 15 | -6.499  | 17.866 | 9.744  | 1.00 | 0.00 | H |
| ATOM | 553 | HG22 | VAL | N | 15 | -6.655  | 16.187 | 9.243  | 1.00 | 0.00 | H |
| ATOM | 554 | HG23 | VAL | N | 15 | -8.099  | 17.091 | 9.741  | 1.00 | 0.00 | H |
| ATOM | 555 | HG11 | VAL | N | 15 | -7.311  | 19.722 | 8.210  | 1.00 | 0.00 | H |
| ATOM | 556 | HG12 | VAL | N | 15 | -8.056  | 19.367 | 6.643  | 1.00 | 0.00 | H |
| ATOM | 557 | HG13 | VAL | N | 15 | -8.967  | 19.081 | 8.140  | 1.00 | 0.00 | H |
| ATOM | 558 | H    | LEU | N | 18 | -11.278 | 15.846 | 5.495  | 1.00 | 0.00 | H |
| ATOM | 559 | CA   | LEU | N | 18 | -13.256 | 15.461 | 6.230  | 1.00 | 0.00 | C |
| ATOM | 560 | HG1  | ARG | N | 17 | -9.180  | 11.802 | 2.265  | 1.00 | 0.00 | H |
| ATOM | 561 | HG2  | ARG | N | 17 | -8.949  | 13.488 | 1.856  | 1.00 | 0.00 | H |
| ATOM | 562 | CD   | ARG | N | 17 | -10.497 | 12.542 | 0.720  | 1.00 | 0.00 | C |
| ATOM | 563 | O    | PRO | N | 22 | -10.024 | 14.930 | -3.199 | 1.00 | 0.00 | O |
| ATOM | 564 | CA   | PRO | N | 22 | -12.314 | 14.322 | -3.674 | 1.00 | 0.00 | C |
| ATOM | 565 | HG1  | GLU | N | 23 | -9.553  | 10.537 | -0.982 | 1.00 | 0.00 | H |
| ATOM | 566 | HG2  | GLU | N | 23 | -10.870 | 10.060 | -2.068 | 1.00 | 0.00 | H |
| ATOM | 567 | CD   | GLU | N | 23 | -9.385  | 8.556  | -1.794 | 1.00 | 0.00 | C |
| ATOM | 568 | HA   | LEU | N | 18 | -13.598 | 14.441 | 6.455  | 1.00 | 0.00 | H |
| ATOM | 569 | CB   | LEU | N | 18 | -12.826 | 16.158 | 7.521  | 1.00 | 0.00 | C |
| ATOM | 570 | C    | LEU | N | 18 | -14.507 | 16.125 | 5.651  | 1.00 | 0.00 | C |
| ATOM | 571 | HD1  | ARG | N | 17 | -11.104 | 13.428 | 0.502  | 1.00 | 0.00 | H |
| ATOM | 572 | HD2  | ARG | N | 17 | -9.786  | 12.445 | -0.119 | 1.00 | 0.00 | H |

|      |     |      |     |   |    |         |        |        |      |      |   |
|------|-----|------|-----|---|----|---------|--------|--------|------|------|---|
| ATOM | 573 | NE   | ARG | N | 17 | -11.353 | 11.357 | 0.791  | 1.00 | 0.00 | N |
| ATOM | 574 | HA   | PRO | N | 22 | -12.948 | 13.447 | -3.475 | 1.00 | 0.00 | H |
| ATOM | 575 | N    | PRO | N | 22 | -12.848 | 15.490 | -2.966 | 1.00 | 0.00 | N |
| ATOM | 576 | CB   | PRO | N | 22 | -12.429 | 14.728 | -5.149 | 1.00 | 0.00 | C |
| ATOM | 577 | OE1  | GLU | N | 23 | -9.436  | 7.852  | -2.839 | 1.00 | 0.00 | O |
| ATOM | 578 | OE2  | GLU | N | 23 | -9.023  | 8.122  | -0.649 | 1.00 | 0.00 | O |
| ATOM | 579 | HB1  | LEU | N | 18 | -12.321 | 17.102 | 7.268  | 1.00 | 0.00 | H |
| ATOM | 580 | HB2  | LEU | N | 18 | -13.738 | 16.427 | 8.074  | 1.00 | 0.00 | H |
| ATOM | 581 | CG   | LEU | N | 18 | -11.911 | 15.339 | 8.445  | 1.00 | 0.00 | C |
| ATOM | 582 | O    | LEU | N | 18 | -15.626 | 15.630 | 5.919  | 1.00 | 0.00 | O |
| ATOM | 583 | N    | PRO | N | 19 | -14.411 | 17.209 | 4.864  | 1.00 | 0.00 | N |
| ATOM | 584 | HE   | ARG | N | 17 | -10.941 | 10.544 | 1.270  | 1.00 | 0.00 | H |
| ATOM | 585 | CZ   | ARG | N | 17 | -12.382 | 11.092 | -0.033 | 1.00 | 0.00 | C |
| ATOM | 586 | C    | THR | N | 21 | -12.707 | 15.586 | -1.639 | 1.00 | 0.00 | C |
| ATOM | 587 | CD   | PRO | N | 22 | -13.694 | 16.330 | -3.836 | 1.00 | 0.00 | C |
| ATOM | 588 | HB1  | PRO | N | 22 | -12.491 | 13.852 | -5.804 | 1.00 | 0.00 | H |
| ATOM | 589 | HB2  | PRO | N | 22 | -11.556 | 15.339 | -5.425 | 1.00 | 0.00 | H |
| ATOM | 590 | CG   | PRO | N | 22 | -13.705 | 15.568 | -5.166 | 1.00 | 0.00 | C |
| ATOM | 591 | HG   | LEU | N | 18 | -10.988 | 15.100 | 7.895  | 1.00 | 0.00 | H |
| ATOM | 592 | CD2  | LEU | N | 18 | -11.548 | 16.249 | 9.620  | 1.00 | 0.00 | C |
| ATOM | 593 | CD1  | LEU | N | 18 | -12.547 | 14.018 | 8.895  | 1.00 | 0.00 | C |
| ATOM | 594 | CA   | PRO | N | 19 | -15.617 | 17.740 | 4.209  | 1.00 | 0.00 | C |
| ATOM | 595 | CD   | PRO | N | 19 | -13.288 | 18.189 | 4.811  | 1.00 | 0.00 | C |
| ATOM | 596 | NH1  | ARG | N | 17 | -12.936 | 12.036 | -0.790 | 1.00 | 0.00 | N |
| ATOM | 597 | NH2  | ARG | N | 17 | -12.869 | 9.844  | -0.084 | 1.00 | 0.00 | N |
| ATOM | 598 | O    | THR | N | 21 | -12.119 | 14.721 | -0.967 | 1.00 | 0.00 | O |
| ATOM | 599 | CA   | THR | N | 21 | -13.202 | 16.847 | -0.921 | 1.00 | 0.00 | C |
| ATOM | 600 | HD1  | PRO | N | 22 | -14.702 | 16.426 | -3.413 | 1.00 | 0.00 | H |
| ATOM | 601 | HD2  | PRO | N | 22 | -13.255 | 17.334 | -3.928 | 1.00 | 0.00 | H |
| ATOM | 602 | HG1  | PRO | N | 22 | -13.773 | 16.241 | -6.025 | 1.00 | 0.00 | H |
| ATOM | 603 | HG2  | PRO | N | 22 | -14.573 | 14.903 | -5.183 | 1.00 | 0.00 | H |
| ATOM | 604 | HD21 | LEU | N | 18 | -10.868 | 15.763 | 10.330 | 1.00 | 0.00 | H |
| ATOM | 605 | HD22 | LEU | N | 18 | -11.053 | 17.165 | 9.261  | 1.00 | 0.00 | H |
| ATOM | 606 | HD23 | LEU | N | 18 | -12.444 | 16.560 | 10.180 | 1.00 | 0.00 | H |
| ATOM | 607 | HD11 | LEU | N | 18 | -13.522 | 14.184 | 9.374  | 1.00 | 0.00 | H |
| ATOM | 608 | HD12 | LEU | N | 18 | -11.906 | 13.494 | 9.619  | 1.00 | 0.00 | H |
| ATOM | 609 | HD13 | LEU | N | 18 | -12.692 | 13.326 | 8.051  | 1.00 | 0.00 | H |
| ATOM | 610 | HA   | PRO | N | 19 | -16.512 | 17.533 | 4.810  | 1.00 | 0.00 | H |
| ATOM | 611 | CB   | PRO | N | 19 | -15.335 | 19.233 | 4.104  | 1.00 | 0.00 | C |
| ATOM | 612 | C    | PRO | N | 19 | -15.882 | 17.087 | 2.847  | 1.00 | 0.00 | C |
| ATOM | 613 | HD1  | PRO | N | 19 | -12.370 | 17.734 | 4.436  | 1.00 | 0.00 | H |
| ATOM | 614 | HD2  | PRO | N | 19 | -13.106 | 18.566 | 5.828  | 1.00 | 0.00 | H |
| ATOM | 615 | CG   | PRO | N | 19 | -13.825 | 19.293 | 3.899  | 1.00 | 0.00 | C |
| ATOM | 616 | HH11 | ARG | N | 17 | -12.590 | 13.001 | -0.805 | 1.00 | 0.00 | H |
| ATOM | 617 | HH12 | ARG | N | 17 | -13.616 | 11.772 | -1.516 | 1.00 | 0.00 | H |
| ATOM | 618 | HH21 | ARG | N | 17 | -12.364 | 9.045  | 0.309  | 1.00 | 0.00 | H |
| ATOM | 619 | HH22 | ARG | N | 17 | -13.674 | 9.637  | -0.685 | 1.00 | 0.00 | H |
| ATOM | 620 | HA   | THR | N | 21 | -13.820 | 17.480 | -1.573 | 1.00 | 0.00 | H |
| ATOM | 621 | N    | THR | N | 21 | -13.981 | 16.445 | 0.230  | 1.00 | 0.00 | N |
| ATOM | 622 | CB   | THR | N | 21 | -11.964 | 17.635 | -0.441 | 1.00 | 0.00 | C |
| ATOM | 623 | HB1  | PRO | N | 19 | -15.907 | 19.725 | 3.319  | 1.00 | 0.00 | H |
| ATOM | 624 | HB2  | PRO | N | 19 | -15.600 | 19.707 | 5.050  | 1.00 | 0.00 | H |
| ATOM | 625 | O    | PRO | N | 19 | -16.666 | 17.641 | 2.047  | 1.00 | 0.00 | O |
| ATOM | 626 | N    | GLY | N | 20 | -15.279 | 15.920 | 2.583  | 1.00 | 0.00 | N |
| ATOM | 627 | HG1  | PRO | N | 19 | -13.419 | 20.279 | 4.151  | 1.00 | 0.00 | H |
| ATOM | 628 | HG2  | PRO | N | 19 | -13.572 | 19.080 | 2.853  | 1.00 | 0.00 | H |
| ATOM | 629 | H    | THR | N | 21 | -13.714 | 16.817 | 1.135  | 1.00 | 0.00 | H |
| ATOM | 630 | C    | GLY | N | 20 | -14.934 | 15.502 | 0.144  | 1.00 | 0.00 | C |
| ATOM | 631 | HB   | THR | N | 21 | -11.302 | 16.907 | 0.046  | 1.00 | 0.00 | H |
| ATOM | 632 | OG1  | THR | N | 21 | -12.369 | 18.584 | 0.549  | 1.00 | 0.00 | O |
| ATOM | 633 | CG2  | THR | N | 21 | -11.232 | 18.291 | -1.600 | 1.00 | 0.00 | C |
| ATOM | 634 | H    | GLY | N | 20 | -14.628 | 15.500 | 3.251  | 1.00 | 0.00 | H |
| ATOM | 635 | CA   | GLY | N | 20 | -15.621 | 15.103 | 1.434  | 1.00 | 0.00 | C |



|      |     |      |     |   |    |         |        |        |      |      |   |
|------|-----|------|-----|---|----|---------|--------|--------|------|------|---|
| ATOM | 636 | O    | GLY | N | 20 | -15.233 | 14.957 | -0.922 | 1.00 | 0.00 | O |
| ATOM | 637 | HG1  | THR | N | 21 | -11.845 | 18.372 | 1.353  | 1.00 | 0.00 | H |
| ATOM | 638 | HG21 | THR | N | 21 | -10.815 | 17.518 | -2.258 | 1.00 | 0.00 | H |
| ATOM | 639 | HG22 | THR | N | 21 | -10.402 | 18.902 | -1.222 | 1.00 | 0.00 | H |
| ATOM | 640 | HG23 | THR | N | 21 | -11.898 | 18.941 | -2.186 | 1.00 | 0.00 | H |
| ATOM | 641 | HA1  | GLY | N | 20 | -16.700 | 15.141 | 1.242  | 1.00 | 0.00 | H |
| ATOM | 642 | HA2  | GLY | N | 20 | -15.327 | 14.067 | 1.647  | 1.00 | 0.00 | H |
| END  |     |      |     |   |    |         |        |        |      |      |   |

#### 4) CRAMBIN – molecule as in the optimized 172W crystal

| COMPND | CRAMBIN OPTIMIZED CRYSTAL 172W GEOMETRY       |      |     |   |    |        |        |        |      |      |   |
|--------|-----------------------------------------------|------|-----|---|----|--------|--------|--------|------|------|---|
| AUTHOR | DELLE PIANE, CORNO, ORLANDO, DOVESI, UGLIENGO |      |     |   |    |        |        |        |      |      |   |
| ATOM   | 1                                             | N    | THR | N | 1  | -6.981 | -4.273 | -2.053 | 1.00 | 0.00 | N |
| ATOM   | 2                                             | H1   | THR | N | 1  | -6.366 | -5.104 | -2.013 | 1.00 | 0.00 | H |
| ATOM   | 3                                             | H2   | THR | N | 1  | -7.626 | -4.384 | -2.862 | 1.00 | 0.00 | H |
| ATOM   | 4                                             | H3   | THR | N | 1  | -7.578 | -4.181 | -1.184 | 1.00 | 0.00 | H |
| ATOM   | 5                                             | CA   | THR | N | 1  | -6.209 | -3.015 | -2.242 | 1.00 | 0.00 | C |
| ATOM   | 6                                             | HA   | THR | N | 1  | -6.902 | -2.179 | -2.074 | 1.00 | 0.00 | H |
| ATOM   | 7                                             | C    | THR | N | 1  | -5.659 | -3.012 | -3.656 | 1.00 | 0.00 | C |
| ATOM   | 8                                             | CB   | THR | N | 1  | -5.097 | -2.937 | -1.169 | 1.00 | 0.00 | C |
| ATOM   | 9                                             | O    | THR | N | 1  | -5.157 | -4.037 | -4.136 | 1.00 | 0.00 | O |
| ATOM   | 10                                            | N    | THR | N | 2  | -5.741 | -1.835 | -4.296 | 1.00 | 0.00 | N |
| ATOM   | 11                                            | HB   | THR | N | 1  | -4.492 | -3.855 | -1.261 | 1.00 | 0.00 | H |
| ATOM   | 12                                            | OG1  | THR | N | 1  | -5.747 | -2.931 | 0.090  | 1.00 | 0.00 | O |
| ATOM   | 13                                            | CG2  | THR | N | 1  | -4.187 | -1.732 | -1.308 | 1.00 | 0.00 | C |
| ATOM   | 14                                            | H    | THR | N | 2  | -6.101 | -1.014 | -3.798 | 1.00 | 0.00 | H |
| ATOM   | 15                                            | CA   | THR | N | 2  | -5.062 | -1.600 | -5.559 | 1.00 | 0.00 | C |
| ATOM   | 16                                            | HG1  | THR | N | 1  | -5.694 | -3.860 | 0.443  | 1.00 | 0.00 | H |
| ATOM   | 17                                            | HG21 | THR | N | 1  | -4.742 | -0.798 | -1.179 | 1.00 | 0.00 | H |
| ATOM   | 18                                            | HG22 | THR | N | 1  | -3.696 | -1.712 | -2.287 | 1.00 | 0.00 | H |
| ATOM   | 19                                            | HG23 | THR | N | 1  | -3.410 | -1.777 | -0.535 | 1.00 | 0.00 | H |
| ATOM   | 20                                            | HA   | THR | N | 2  | -4.867 | -2.578 | -6.015 | 1.00 | 0.00 | H |
| ATOM   | 21                                            | C    | THR | N | 2  | -3.725 | -0.926 | -5.260 | 1.00 | 0.00 | C |
| ATOM   | 22                                            | CB   | THR | N | 2  | -5.940 | -0.775 | -6.535 | 1.00 | 0.00 | C |
| ATOM   | 23                                            | O    | THR | N | 2  | -3.636 | 0.012  | -4.433 | 1.00 | 0.00 | O |
| ATOM   | 24                                            | N    | CYS | N | 3  | -2.679 | -1.411 | -5.929 | 1.00 | 0.00 | N |
| ATOM   | 25                                            | HB   | THR | N | 2  | -5.389 | -0.716 | -7.489 | 1.00 | 0.00 | H |
| ATOM   | 26                                            | OG1  | THR | N | 2  | -6.095 | 0.559  | -6.075 | 1.00 | 0.00 | O |
| ATOM   | 27                                            | CG2  | THR | N | 2  | -7.272 | -1.482 | -6.757 | 1.00 | 0.00 | C |
| ATOM   | 28                                            | H    | CYS | N | 3  | -2.825 | -2.235 | -6.533 | 1.00 | 0.00 | H |
| ATOM   | 29                                            | CA   | CYS | N | 3  | -1.310 | -0.994 | -5.669 | 1.00 | 0.00 | C |
| ATOM   | 30                                            | HG1  | THR | N | 2  | -6.964 | 0.684  | -5.607 | 1.00 | 0.00 | H |
| ATOM   | 31                                            | HG21 | THR | N | 2  | -7.960 | -0.833 | -7.308 | 1.00 | 0.00 | H |
| ATOM   | 32                                            | HG22 | THR | N | 2  | -7.750 | -1.746 | -5.806 | 1.00 | 0.00 | H |
| ATOM   | 33                                            | HG23 | THR | N | 2  | -7.130 | -2.411 | -7.328 | 1.00 | 0.00 | H |
| ATOM   | 34                                            | HA   | CYS | N | 3  | -1.338 | -0.095 | -5.040 | 1.00 | 0.00 | H |
| ATOM   | 35                                            | C    | CYS | N | 3  | -0.662 | -0.709 | -7.023 | 1.00 | 0.00 | C |
| ATOM   | 36                                            | CB   | CYS | N | 3  | -0.512 | -2.104 | -4.968 | 1.00 | 0.00 | C |
| ATOM   | 37                                            | O    | CYS | N | 3  | -0.690 | -1.584 | -7.904 | 1.00 | 0.00 | O |
| ATOM   | 38                                            | N    | CYS | N | 4  | -0.075 | 0.479  | -7.208 | 1.00 | 0.00 | N |
| ATOM   | 39                                            | HB1  | CYS | N | 3  | 0.510  | -1.753 | -4.785 | 1.00 | 0.00 | H |
| ATOM   | 40                                            | HB2  | CYS | N | 3  | -0.469 | -2.995 | -5.609 | 1.00 | 0.00 | H |
| ATOM   | 41                                            | SG   | CYS | N | 3  | -1.226 | -2.706 | -3.398 | 1.00 | 0.00 | S |
| ATOM   | 42                                            | H    | CYS | N | 4  | -0.046 | 1.199  | -6.479 | 1.00 | 0.00 | H |
| ATOM   | 43                                            | CA   | CYS | N | 4  | 0.416  | 0.827  | -8.528 | 1.00 | 0.00 | C |
| ATOM   | 44                                            | SG   | CYS | N | 40 | -0.820 | -1.125 | -2.107 | 1.00 | 0.00 | S |
| ATOM   | 45                                            | HA   | CYS | N | 4  | 0.126  | -0.001 | -9.178 | 1.00 | 0.00 | H |

|      |     |     |     |   |    |        |        |         |      |      |   |
|------|-----|-----|-----|---|----|--------|--------|---------|------|------|---|
| ATOM | 46  | C   | CYS | N | 4  | 1.939  | 0.916  | -8.521  | 1.00 | 0.00 | C |
| ATOM | 47  | CB  | CYS | N | 4  | -0.255 | 2.101  | -9.050  | 1.00 | 0.00 | C |
| ATOM | 48  | CB  | CYS | N | 40 | 0.921  | -1.474 | -1.645  | 1.00 | 0.00 | C |
| ATOM | 49  | O   | CYS | N | 4  | 2.563  | 1.414  | -7.570  | 1.00 | 0.00 | O |
| ATOM | 50  | N   | PRO | N | 5  | 2.575  | 0.437  | -9.605  | 1.00 | 0.00 | N |
| ATOM | 51  | HB1 | CYS | N | 4  | 0.222  | 2.474  | -9.965  | 1.00 | 0.00 | H |
| ATOM | 52  | HB2 | CYS | N | 4  | -0.205 | 2.912  | -8.311  | 1.00 | 0.00 | H |
| ATOM | 53  | SG  | CYS | N | 4  | -2.046 | 1.849  | -9.375  | 1.00 | 0.00 | S |
| ATOM | 54  | HB1 | CYS | N | 40 | 1.549  | -1.517 | -2.545  | 1.00 | 0.00 | H |
| ATOM | 55  | HB2 | CYS | N | 40 | 1.246  | -0.591 | -1.073  | 1.00 | 0.00 | H |
| ATOM | 56  | CA  | CYS | N | 40 | 1.075  | -2.741 | -0.801  | 1.00 | 0.00 | C |
| ATOM | 57  | CA  | PRO | N | 5  | 4.046  | 0.443  | -9.656  | 1.00 | 0.00 | C |
| ATOM | 58  | CD  | PRO | N | 5  | 1.975  | -0.229 | -10.790 | 1.00 | 0.00 | C |
| ATOM | 59  | SG  | CYS | N | 32 | -2.058 | 0.916  | -11.241 | 1.00 | 0.00 | S |
| ATOM | 60  | HA  | CYS | N | 40 | 0.639  | -3.595 | -1.332  | 1.00 | 0.00 | H |
| ATOM | 61  | N   | CYS | N | 40 | 0.402  | -2.581 | 0.462   | 1.00 | 0.00 | N |
| ATOM | 62  | C   | CYS | N | 40 | 2.571  | -2.985 | -0.593  | 1.00 | 0.00 | C |
| ATOM | 63  | HA  | PRO | N | 5  | 4.471  | 0.091  | -8.710  | 1.00 | 0.00 | H |
| ATOM | 64  | C   | PRO | N | 5  | 4.631  | 1.837  | -9.876  | 1.00 | 0.00 | C |
| ATOM | 65  | CB  | PRO | N | 5  | 4.348  | -0.520 | -10.812 | 1.00 | 0.00 | C |
| ATOM | 66  | HD1 | PRO | N | 5  | 1.147  | 0.359  | -11.204 | 1.00 | 0.00 | H |
| ATOM | 67  | HD2 | PRO | N | 5  | 1.596  | -1.219 | -10.504 | 1.00 | 0.00 | H |
| ATOM | 68  | CG  | PRO | N | 5  | 3.154  | -0.357 | -11.749 | 1.00 | 0.00 | C |
| ATOM | 69  | CB  | CYS | N | 32 | -2.384 | -0.863 | -10.866 | 1.00 | 0.00 | C |
| ATOM | 70  | H   | CYS | N | 40 | 0.018  | -1.659 | 0.693   | 1.00 | 0.00 | H |
| ATOM | 71  | C   | THR | N | 39 | 0.323  | -3.584 | 1.354   | 1.00 | 0.00 | C |
| ATOM | 72  | O   | CYS | N | 40 | 3.194  | -2.409 | 0.317   | 1.00 | 0.00 | O |
| ATOM | 73  | N   | PRO | N | 41 | 3.175  | -3.780 | -1.485  | 1.00 | 0.00 | N |
| ATOM | 74  | O   | PRO | N | 5  | 5.836  | 2.032  | -9.650  | 1.00 | 0.00 | O |
| ATOM | 75  | N   | SER | N | 6  | 3.795  | 2.768  | -10.365 | 1.00 | 0.00 | N |
| ATOM | 76  | HB1 | PRO | N | 5  | 5.317  | -0.329 | -11.282 | 1.00 | 0.00 | H |
| ATOM | 77  | HB2 | PRO | N | 5  | 4.368  | -1.540 | -10.414 | 1.00 | 0.00 | H |
| ATOM | 78  | HG1 | PRO | N | 5  | 3.036  | -1.193 | -12.446 | 1.00 | 0.00 | H |
| ATOM | 79  | HG2 | PRO | N | 5  | 3.239  | 0.552  | -12.357 | 1.00 | 0.00 | H |
| ATOM | 80  | HB1 | CYS | N | 32 | -2.654 | -0.929 | -9.806  | 1.00 | 0.00 | H |
| ATOM | 81  | HB2 | CYS | N | 32 | -3.274 | -1.131 | -11.451 | 1.00 | 0.00 | H |
| ATOM | 82  | CA  | CYS | N | 32 | -1.238 | -1.843 | -11.165 | 1.00 | 0.00 | C |
| ATOM | 83  | O   | THR | N | 39 | 0.778  | -4.717 | 1.156   | 1.00 | 0.00 | O |
| ATOM | 84  | CA  | THR | N | 39 | -0.437 | -3.215 | 2.626   | 1.00 | 0.00 | C |
| ATOM | 85  | CA  | PRO | N | 41 | 4.624  | -3.949 | -1.455  | 1.00 | 0.00 | C |
| ATOM | 86  | CD  | PRO | N | 41 | 2.538  | -4.512 | -2.606  | 1.00 | 0.00 | C |
| ATOM | 87  | H   | SER | N | 6  | 2.810  | 2.554  | -10.481 | 1.00 | 0.00 | H |
| ATOM | 88  | CA  | SER | N | 6  | 4.181  | 4.146  | -10.560 | 1.00 | 0.00 | C |
| ATOM | 89  | HA  | CYS | N | 32 | -0.391 | -1.626 | -10.505 | 1.00 | 0.00 | H |
| ATOM | 90  | N   | CYS | N | 32 | -0.808 | -1.774 | -12.548 | 1.00 | 0.00 | N |
| ATOM | 91  | C   | CYS | N | 32 | -1.711 | -3.276 | -10.827 | 1.00 | 0.00 | C |
| ATOM | 92  | HA  | THR | N | 39 | -0.504 | -2.123 | 2.722   | 1.00 | 0.00 | H |
| ATOM | 93  | N   | THR | N | 39 | -1.795 | -3.714 | 2.510   | 1.00 | 0.00 | N |
| ATOM | 94  | CB  | THR | N | 39 | 0.232  | -3.793 | 3.894   | 1.00 | 0.00 | C |
| ATOM | 95  | HA  | PRO | N | 41 | 4.956  | -4.207 | -0.440  | 1.00 | 0.00 | H |
| ATOM | 96  | CB  | PRO | N | 41 | 4.847  | -5.111 | -2.443  | 1.00 | 0.00 | C |
| ATOM | 97  | C   | PRO | N | 41 | 5.313  | -2.637 | -1.883  | 1.00 | 0.00 | C |
| ATOM | 98  | HD1 | PRO | N | 41 | 1.833  | -3.870 | -3.151  | 1.00 | 0.00 | H |
| ATOM | 99  | HD2 | PRO | N | 41 | 1.987  | -5.383 | -2.219  | 1.00 | 0.00 | H |
| ATOM | 100 | CG  | PRO | N | 41 | 3.724  | -4.949 | -3.459  | 1.00 | 0.00 | C |
| ATOM | 101 | HA  | SER | N | 6  | 4.943  | 4.384  | -9.810  | 1.00 | 0.00 | H |
| ATOM | 102 | C   | SER | N | 6  | 2.974  | 5.047  | -10.328 | 1.00 | 0.00 | C |
| ATOM | 103 | CB  | SER | N | 6  | 4.783  | 4.402  | -11.937 | 1.00 | 0.00 | C |
| ATOM | 104 | H   | CYS | N | 32 | -1.475 | -1.383 | -13.218 | 1.00 | 0.00 | H |
| ATOM | 105 | C   | GLY | N | 31 | 0.220  | -2.509 | -13.020 | 1.00 | 0.00 | C |
| ATOM | 106 | O   | CYS | N | 32 | -1.912 | -4.107 | -11.718 | 1.00 | 0.00 | O |
| ATOM | 107 | N   | ILE | N | 33 | -1.907 | -3.522 | -9.524  | 1.00 | 0.00 | N |
| ATOM | 108 | H   | THR | N | 39 | -1.893 | -4.738 | 2.549   | 1.00 | 0.00 | H |

|      |     |      |     |   |    |        |        |         |      |      |   |
|------|-----|------|-----|---|----|--------|--------|---------|------|------|---|
| ATOM | 109 | C    | ALA | N | 38 | -2.879 | -2.923 | 2.442   | 1.00 | 0.00 | C |
| ATOM | 110 | HB   | THR | N | 39 | 0.420  | -4.866 | 3.733   | 1.00 | 0.00 | H |
| ATOM | 111 | OG1  | THR | N | 39 | -0.649 | -3.628 | 5.001   | 1.00 | 0.00 | O |
| ATOM | 112 | CG2  | THR | N | 39 | 1.549  | -3.110 | 4.215   | 1.00 | 0.00 | C |
| ATOM | 113 | HB1  | PRO | N | 41 | 5.838  | -5.087 | -2.887  | 1.00 | 0.00 | H |
| ATOM | 114 | HB2  | PRO | N | 41 | 4.746  | -6.061 | -1.896  | 1.00 | 0.00 | H |
| ATOM | 115 | O    | PRO | N | 41 | 4.727  | -1.770 | -2.543  | 1.00 | 0.00 | O |
| ATOM | 116 | N    | GLY | N | 42 | 6.616  | -2.517 | -1.519  | 1.00 | 0.00 | N |
| ATOM | 117 | HG1  | PRO | N | 41 | 3.521  | -5.874 | -4.007  | 1.00 | 0.00 | H |
| ATOM | 118 | HG2  | PRO | N | 41 | 3.993  | -4.157 | -4.172  | 1.00 | 0.00 | H |
| ATOM | 119 | O    | SER | N | 6  | 1.811  | 4.608  | -10.369 | 1.00 | 0.00 | O |
| ATOM | 120 | N    | ILE | N | 7  | 3.282  | 6.333  | -10.111 | 1.00 | 0.00 | N |
| ATOM | 121 | HB1  | SER | N | 6  | 5.301  | 5.365  | -11.917 | 1.00 | 0.00 | H |
| ATOM | 122 | HB2  | SER | N | 6  | 5.540  | 3.633  | -12.128 | 1.00 | 0.00 | H |
| ATOM | 123 | OG   | SER | N | 6  | 3.776  | 4.396  | -12.945 | 1.00 | 0.00 | O |
| ATOM | 124 | O    | GLY | N | 31 | 1.007  | -3.124 | -12.278 | 1.00 | 0.00 | O |
| ATOM | 125 | CA   | GLY | N | 31 | 0.424  | -2.558 | -14.535 | 1.00 | 0.00 | C |
| ATOM | 126 | H    | ILE | N | 33 | -1.614 | -2.824 | -8.835  | 1.00 | 0.00 | H |
| ATOM | 127 | CA   | ILE | N | 33 | -2.190 | -4.860 | -9.045  | 1.00 | 0.00 | C |
| ATOM | 128 | O    | ALA | N | 38 | -2.827 | -1.694 | 2.236   | 1.00 | 0.00 | O |
| ATOM | 129 | CA   | ALA | N | 38 | -4.224 | -3.601 | 2.746   | 1.00 | 0.00 | C |
| ATOM | 130 | HG1  | THR | N | 39 | -1.361 | -4.311 | 4.940   | 1.00 | 0.00 | H |
| ATOM | 131 | HG21 | THR | N | 39 | 2.264  | -3.233 | 3.390   | 1.00 | 0.00 | H |
| ATOM | 132 | HG22 | THR | N | 39 | 1.986  | -3.551 | 5.124   | 1.00 | 0.00 | H |
| ATOM | 133 | HG23 | THR | N | 39 | 1.403  | -2.028 | 4.366   | 1.00 | 0.00 | H |
| ATOM | 134 | H    | GLY | N | 42 | 7.086  | -3.306 | -1.085  | 1.00 | 0.00 | H |
| ATOM | 135 | CA   | GLY | N | 42 | 7.403  | -1.326 | -1.795  | 1.00 | 0.00 | C |
| ATOM | 136 | H    | ILE | N | 7  | 4.275  | 6.607  | -10.065 | 1.00 | 0.00 | H |
| ATOM | 137 | CA   | ILE | N | 7  | 2.262  | 7.357  | -9.959  | 1.00 | 0.00 | C |
| ATOM | 138 | H    | SER | N | 6  | 4.194  | 4.838  | -13.710 | 1.00 | 0.00 | H |
| ATOM | 139 | HA1  | GLY | N | 31 | 0.524  | -3.613 | -14.820 | 1.00 | 0.00 | H |
| ATOM | 140 | HA2  | GLY | N | 31 | 1.375  | -2.056 | -14.768 | 1.00 | 0.00 | H |
| ATOM | 141 | N    | GLY | N | 31 | -0.650 | -1.971 | -15.301 | 1.00 | 0.00 | N |
| ATOM | 142 | HA   | ILE | N | 33 | -2.575 | -5.434 | -9.896  | 1.00 | 0.00 | H |
| ATOM | 143 | C    | ILE | N | 33 | -3.277 | -4.788 | -7.981  | 1.00 | 0.00 | C |
| ATOM | 144 | CB   | ILE | N | 33 | -0.907 | -5.586 | -8.545  | 1.00 | 0.00 | C |
| ATOM | 145 | HA   | ALA | N | 38 | -4.925 | -3.273 | 1.985   | 1.00 | 0.00 | H |
| ATOM | 146 | N    | ALA | N | 38 | -4.144 | -5.058 | 2.692   | 1.00 | 0.00 | N |
| ATOM | 147 | CB   | ALA | N | 38 | -4.718 | -3.089 | 4.109   | 1.00 | 0.00 | C |
| ATOM | 148 | HA1  | GLY | N | 42 | 8.334  | -1.369 | -1.222  | 1.00 | 0.00 | H |
| ATOM | 149 | HA2  | GLY | N | 42 | 6.865  | -0.434 | -1.442  | 1.00 | 0.00 | H |
| ATOM | 150 | C    | GLY | N | 42 | 7.757  | -1.056 | -3.253  | 1.00 | 0.00 | C |
| ATOM | 151 | HA   | ILE | N | 7  | 1.515  | 7.000  | -9.235  | 1.00 | 0.00 | H |
| ATOM | 152 | C    | ILE | N | 7  | 1.427  | 7.554  | -11.232 | 1.00 | 0.00 | C |
| ATOM | 153 | CB   | ILE | N | 7  | 2.897  | 8.654  | -9.409  | 1.00 | 0.00 | C |
| ATOM | 154 | H    | GLY | N | 31 | -1.448 | -2.568 | -15.512 | 1.00 | 0.00 | H |
| ATOM | 155 | C    | THR | N | 30 | -0.734 | -0.660 | -15.569 | 1.00 | 0.00 | C |
| ATOM | 156 | O    | ILE | N | 33 | -3.483 | -3.756 | -7.318  | 1.00 | 0.00 | O |
| ATOM | 157 | N    | ILE | N | 34 | -3.963 | -5.932 | -7.800  | 1.00 | 0.00 | N |
| ATOM | 158 | HB   | ILE | N | 33 | -1.210 | -6.611 | -8.296  | 1.00 | 0.00 | H |
| ATOM | 159 | CG2  | ILE | N | 33 | 0.099  | -5.653 | -9.696  | 1.00 | 0.00 | C |
| ATOM | 160 | CG1  | ILE | N | 33 | -0.324 | -4.968 | -7.261  | 1.00 | 0.00 | C |
| ATOM | 161 | H    | ALA | N | 38 | -3.641 | -5.487 | 3.479   | 1.00 | 0.00 | H |
| ATOM | 162 | C    | GLY | N | 37 | -4.583 | -5.842 | 1.689   | 1.00 | 0.00 | C |
| ATOM | 163 | HB1  | ALA | N | 38 | -5.708 | -3.502 | 4.336   | 1.00 | 0.00 | H |
| ATOM | 164 | HB2  | ALA | N | 38 | -4.026 | -3.365 | 4.915   | 1.00 | 0.00 | H |
| ATOM | 165 | HB3  | ALA | N | 38 | -4.801 | -1.994 | 4.074   | 1.00 | 0.00 | H |
| ATOM | 166 | O    | GLY | N | 42 | 8.312  | 0.007  | -3.562  | 1.00 | 0.00 | O |
| ATOM | 167 | N    | ASP | N | 43 | 7.372  | -1.991 | -4.145  | 1.00 | 0.00 | N |
| ATOM | 168 | O    | ILE | N | 7  | 0.196  | 7.663  | -11.118 | 1.00 | 0.00 | O |
| ATOM | 169 | N    | VAL | N | 8  | 2.046  | 7.582  | -12.425 | 1.00 | 0.00 | N |
| ATOM | 170 | HB   | ILE | N | 7  | 3.833  | 8.833  | -9.969  | 1.00 | 0.00 | H |
| ATOM | 171 | CG2  | ILE | N | 7  | 1.990  | 9.858  | -9.628  | 1.00 | 0.00 | C |

|      |     |      |     |   |    |        |        |         |      |      |   |
|------|-----|------|-----|---|----|--------|--------|---------|------|------|---|
| ATOM | 172 | CG1  | ILE | N | 7  | 3.238  | 8.442  | -7.920  | 1.00 | 0.00 | C |
| ATOM | 173 | O    | THR | N | 30 | 0.137  | 0.170  | -15.256 | 1.00 | 0.00 | O |
| ATOM | 174 | CA   | THR | N | 30 | -2.048 | -0.155 | -16.154 | 1.00 | 0.00 | C |
| ATOM | 175 | H    | ILE | N | 34 | -3.720 | -6.734 | -8.387  | 1.00 | 0.00 | H |
| ATOM | 176 | CA   | ILE | N | 34 | -4.896 | -6.102 | -6.699  | 1.00 | 0.00 | C |
| ATOM | 177 | HG21 | ILE | N | 33 | 1.059  | -6.031 | -9.349  | 1.00 | 0.00 | H |
| ATOM | 178 | HG22 | ILE | N | 33 | 0.294  | -4.668 | -10.135 | 1.00 | 0.00 | H |
| ATOM | 179 | HG23 | ILE | N | 33 | -0.259 | -6.319 | -10.494 | 1.00 | 0.00 | H |
| ATOM | 180 | HG11 | ILE | N | 33 | 0.036  | -3.948 | -7.467  | 1.00 | 0.00 | H |
| ATOM | 181 | HG12 | ILE | N | 33 | -1.135 | -4.867 | -6.519  | 1.00 | 0.00 | H |
| ATOM | 182 | CD1  | ILE | N | 33 | 0.806  | -5.788 | -6.634  | 1.00 | 0.00 | C |
| ATOM | 183 | O    | GLY | N | 37 | -5.192 | -5.439 | 0.685   | 1.00 | 0.00 | O |
| ATOM | 184 | CA   | GLY | N | 37 | -4.277 | -7.340 | 1.876   | 1.00 | 0.00 | C |
| ATOM | 185 | H    | ASP | N | 43 | 7.115  | -2.921 | -3.822  | 1.00 | 0.00 | H |
| ATOM | 186 | CA   | ASP | N | 43 | 7.540  | -1.865 | -5.575  | 1.00 | 0.00 | C |
| ATOM | 187 | H    | VAL | N | 8  | 3.075  | 7.571  | -12.474 | 1.00 | 0.00 | H |
| ATOM | 188 | CA   | VAL | N | 8  | 1.231  | 7.642  | -13.635 | 1.00 | 0.00 | C |
| ATOM | 189 | HG21 | ILE | N | 7  | 2.486  | 10.761 | -9.261  | 1.00 | 0.00 | H |
| ATOM | 190 | HG22 | ILE | N | 7  | 1.774  | 10.026 | -10.692 | 1.00 | 0.00 | H |
| ATOM | 191 | HG23 | ILE | N | 7  | 1.030  | 9.743  | -9.102  | 1.00 | 0.00 | H |
| ATOM | 192 | HG11 | ILE | N | 7  | 3.912  | 7.578  | -7.833  | 1.00 | 0.00 | H |
| ATOM | 193 | HG12 | ILE | N | 7  | 2.305  | 8.163  | -7.398  | 1.00 | 0.00 | H |
| ATOM | 194 | CD1  | ILE | N | 7  | 3.882  | 9.623  | -7.203  | 1.00 | 0.00 | C |
| ATOM | 195 | HA   | THR | N | 30 | -1.784 | 0.506  | -16.991 | 1.00 | 0.00 | H |
| ATOM | 196 | N    | THR | N | 30 | -2.922 | -1.203 | -16.648 | 1.00 | 0.00 | N |
| ATOM | 197 | CB   | THR | N | 30 | -2.743 | 0.671  | -15.042 | 1.00 | 0.00 | C |
| ATOM | 198 | HA   | ILE | N | 34 | -4.968 | -5.129 | -6.201  | 1.00 | 0.00 | H |
| ATOM | 199 | C    | ILE | N | 34 | -4.312 | -7.131 | -5.740  | 1.00 | 0.00 | C |
| ATOM | 200 | CB   | ILE | N | 34 | -6.308 | -6.589 | -7.113  | 1.00 | 0.00 | C |
| ATOM | 201 | HD11 | ILE | N | 33 | 1.699  | -5.811 | -7.274  | 1.00 | 0.00 | H |
| ATOM | 202 | HD12 | ILE | N | 33 | 1.115  | -5.356 | -5.670  | 1.00 | 0.00 | H |
| ATOM | 203 | HD13 | ILE | N | 33 | 0.476  | -6.826 | -6.460  | 1.00 | 0.00 | H |
| ATOM | 204 | HA1  | GLY | N | 37 | -3.203 | -7.445 | 2.083   | 1.00 | 0.00 | H |
| ATOM | 205 | HA2  | GLY | N | 37 | -4.844 | -7.699 | 2.749   | 1.00 | 0.00 | H |
| ATOM | 206 | N    | GLY | N | 37 | -4.587 | -8.140 | 0.714   | 1.00 | 0.00 | N |
| ATOM | 207 | HA   | ASP | N | 43 | 8.092  | -0.928 | -5.740  | 1.00 | 0.00 | H |
| ATOM | 208 | CB   | ASP | N | 43 | 8.362  | -3.012 | -6.185  | 1.00 | 0.00 | C |
| ATOM | 209 | C    | ASP | N | 43 | 6.188  | -1.674 | -6.293  | 1.00 | 0.00 | C |
| ATOM | 210 | HA   | VAL | N | 8  | 0.474  | 8.427  | -13.495 | 1.00 | 0.00 | H |
| ATOM | 211 | C    | VAL | N | 8  | 0.386  | 6.376  | -13.797 | 1.00 | 0.00 | C |
| ATOM | 212 | CB   | VAL | N | 8  | 2.063  | 7.992  | -14.894 | 1.00 | 0.00 | C |
| ATOM | 213 | HD11 | ILE | N | 7  | 4.830  | 9.910  | -7.679  | 1.00 | 0.00 | H |
| ATOM | 214 | HD12 | ILE | N | 7  | 4.099  | 9.366  | -6.157  | 1.00 | 0.00 | H |
| ATOM | 215 | HD13 | ILE | N | 7  | 3.236  | 10.512 | -7.188  | 1.00 | 0.00 | H |
| ATOM | 216 | H    | THR | N | 30 | -3.621 | -1.601 | -16.018 | 1.00 | 0.00 | H |
| ATOM | 217 | C    | TYR | N | 29 | -3.032 | -1.494 | -17.965 | 1.00 | 0.00 | C |
| ATOM | 218 | HB   | THR | N | 30 | -2.024 | 1.426  | -14.698 | 1.00 | 0.00 | H |
| ATOM | 219 | OG1  | THR | N | 30 | -2.982 | -0.172 | -13.904 | 1.00 | 0.00 | O |
| ATOM | 220 | CG2  | THR | N | 30 | -4.002 | 1.378  | -15.522 | 1.00 | 0.00 | C |
| ATOM | 221 | O    | ILE | N | 34 | -3.969 | -8.261 | -6.165  | 1.00 | 0.00 | O |
| ATOM | 222 | N    | ILE | N | 35 | -4.250 | -6.788 | -4.452  | 1.00 | 0.00 | N |
| ATOM | 223 | HB   | ILE | N | 34 | -6.201 | -7.637 | -7.440  | 1.00 | 0.00 | H |
| ATOM | 224 | CG1  | ILE | N | 34 | -6.892 | -5.815 | -8.301  | 1.00 | 0.00 | C |
| ATOM | 225 | CG2  | ILE | N | 34 | -7.240 | -6.541 | -5.895  | 1.00 | 0.00 | C |
| ATOM | 226 | H    | GLY | N | 37 | -3.784 | -8.445 | 0.152   | 1.00 | 0.00 | H |
| ATOM | 227 | C    | PRO | N | 36 | -5.817 | -8.596 | 0.446   | 1.00 | 0.00 | C |
| ATOM | 228 | HB1  | ASP | N | 43 | 8.484  | -2.856 | -7.262  | 1.00 | 0.00 | H |
| ATOM | 229 | HB2  | ASP | N | 43 | 9.363  | -2.978 | -5.733  | 1.00 | 0.00 | H |
| ATOM | 230 | CG   | ASP | N | 43 | 7.824  | -4.422 | -5.959  | 1.00 | 0.00 | C |
| ATOM | 231 | O    | ASP | N | 43 | 6.149  | -1.501 | -7.525  | 1.00 | 0.00 | O |
| ATOM | 232 | N    | TYR | N | 44 | 5.089  | -1.662 | -5.524  | 1.00 | 0.00 | N |
| ATOM | 233 | O    | VAL | N | 8  | -0.765 | 6.476  | -14.243 | 1.00 | 0.00 | O |
| ATOM | 234 | N    | ALA | N | 9  | 0.912  | 5.191  | -13.434 | 1.00 | 0.00 | N |

|      |     |      |     |   |    |        |         |         |      |      |   |
|------|-----|------|-----|---|----|--------|---------|---------|------|------|---|
| ATOM | 235 | HB   | VAL | N | 8  | 3.046  | 7.497   | -14.789 | 1.00 | 0.00 | H |
| ATOM | 236 | CG1  | VAL | N | 8  | 1.426  | 7.475   | -16.191 | 1.00 | 0.00 | C |
| ATOM | 237 | CG2  | VAL | N | 8  | 2.274  | 9.512   | -14.939 | 1.00 | 0.00 | C |
| ATOM | 238 | O    | TYR | N | 29 | -2.303 | -1.017  | -18.833 | 1.00 | 0.00 | O |
| ATOM | 239 | CA   | TYR | N | 29 | -4.204 | -2.404  | -18.355 | 1.00 | 0.00 | C |
| ATOM | 240 | HG1  | THR | N | 30 | -3.774 | -0.727  | -14.089 | 1.00 | 0.00 | H |
| ATOM | 241 | HG21 | THR | N | 30 | -4.356 | 2.054   | -14.738 | 1.00 | 0.00 | H |
| ATOM | 242 | HG22 | THR | N | 30 | -4.803 | 0.669   | -15.770 | 1.00 | 0.00 | H |
| ATOM | 243 | HG23 | THR | N | 30 | -3.776 | 1.981   | -16.412 | 1.00 | 0.00 | H |
| ATOM | 244 | H    | ILE | N | 35 | -4.581 | -5.860  | -4.169  | 1.00 | 0.00 | H |
| ATOM | 245 | CA   | ILE | N | 35 | -3.826 | -7.743  | -3.443  | 1.00 | 0.00 | C |
| ATOM | 246 | HG11 | ILE | N | 34 | -6.137 | -5.758  | -9.097  | 1.00 | 0.00 | H |
| ATOM | 247 | HG12 | ILE | N | 34 | -7.123 | -4.780  | -7.991  | 1.00 | 0.00 | H |
| ATOM | 248 | CD1  | ILE | N | 34 | -8.139 | -6.496  | -8.862  | 1.00 | 0.00 | C |
| ATOM | 249 | HG21 | ILE | N | 34 | -8.233 | -6.922  | -6.162  | 1.00 | 0.00 | H |
| ATOM | 250 | HG22 | ILE | N | 34 | -6.879 | -7.150  | -5.055  | 1.00 | 0.00 | H |
| ATOM | 251 | HG23 | ILE | N | 34 | -7.354 | -5.508  | -5.529  | 1.00 | 0.00 | H |
| ATOM | 252 | O    | PRO | N | 36 | -6.810 | -8.400  | 1.168   | 1.00 | 0.00 | O |
| ATOM | 253 | CA   | PRO | N | 36 | -6.044 | -9.432  | -0.815  | 1.00 | 0.00 | C |
| ATOM | 254 | OD2  | ASP | N | 43 | 7.101  | -4.644  | -4.943  | 1.00 | 0.00 | O |
| ATOM | 255 | OD1  | ASP | N | 43 | 8.161  | -5.311  | -6.808  | 1.00 | 0.00 | O |
| ATOM | 256 | H    | TYR | N | 44 | 5.196  | -1.753  | -4.510  | 1.00 | 0.00 | H |
| ATOM | 257 | CA   | TYR | N | 44 | 3.775  | -1.270  | -6.020  | 1.00 | 0.00 | C |
| ATOM | 258 | H    | ALA | N | 9  | 1.867  | 5.122   | -13.077 | 1.00 | 0.00 | H |
| ATOM | 259 | CA   | ALA | N | 9  | 0.073  | 3.995   | -13.471 | 1.00 | 0.00 | C |
| ATOM | 260 | HG11 | VAL | N | 8  | 2.055  | 7.744   | -17.049 | 1.00 | 0.00 | H |
| ATOM | 261 | HG12 | VAL | N | 8  | 1.319  | 6.380   | -16.193 | 1.00 | 0.00 | H |
| ATOM | 262 | HG13 | VAL | N | 8  | 0.420  | 7.892   | -16.353 | 1.00 | 0.00 | H |
| ATOM | 263 | HG21 | VAL | N | 8  | 2.835  | 9.804   | -15.835 | 1.00 | 0.00 | H |
| ATOM | 264 | HG22 | VAL | N | 8  | 2.824  | 9.876   | -14.059 | 1.00 | 0.00 | H |
| ATOM | 265 | HG23 | VAL | N | 8  | 1.303  | 10.033  | -14.967 | 1.00 | 0.00 | H |
| ATOM | 266 | HA   | TYR | N | 29 | -3.902 | -2.810  | -19.329 | 1.00 | 0.00 | H |
| ATOM | 267 | N    | TYR | N | 29 | -4.407 | -3.515  | -17.429 | 1.00 | 0.00 | N |
| ATOM | 268 | CB   | TYR | N | 29 | -5.489 | -1.558  | -18.523 | 1.00 | 0.00 | C |
| ATOM | 269 | HA   | ILE | N | 35 | -3.648 | -8.672  | -3.990  | 1.00 | 0.00 | H |
| ATOM | 270 | C    | ILE | N | 35 | -4.960 | -7.961  | -2.446  | 1.00 | 0.00 | C |
| ATOM | 271 | CB   | ILE | N | 35 | -2.493 | -7.342  | -2.747  | 1.00 | 0.00 | C |
| ATOM | 272 | HD11 | ILE | N | 34 | -8.495 | -5.981  | -9.756  | 1.00 | 0.00 | H |
| ATOM | 273 | HD12 | ILE | N | 34 | -8.976 | -6.511  | -8.152  | 1.00 | 0.00 | H |
| ATOM | 274 | HD13 | ILE | N | 34 | -7.915 | -7.535  | -9.145  | 1.00 | 0.00 | H |
| ATOM | 275 | HA   | PRO | N | 36 | -7.053 | -9.177  | -1.156  | 1.00 | 0.00 | H |
| ATOM | 276 | N    | PRO | N | 36 | -5.062 | -9.177  | -1.879  | 1.00 | 0.00 | N |
| ATOM | 277 | CB   | PRO | N | 36 | -5.973 | -10.957 | -0.565  | 1.00 | 0.00 | C |
| ATOM | 278 | HA   | TYR | N | 44 | 3.938  | -0.794  | -6.995  | 1.00 | 0.00 | H |
| ATOM | 279 | CB   | TYR | N | 44 | 2.815  | -2.446  | -6.211  | 1.00 | 0.00 | C |
| ATOM | 280 | C    | TYR | N | 44 | 3.235  | -0.200  | -5.067  | 1.00 | 0.00 | C |
| ATOM | 281 | HA   | ALA | N | 9  | -0.320 | 3.873   | -14.489 | 1.00 | 0.00 | H |
| ATOM | 282 | CB   | ALA | N | 9  | 0.872  | 2.740   | -13.121 | 1.00 | 0.00 | C |
| ATOM | 283 | C    | ALA | N | 9  | -1.174 | 4.191   | -12.584 | 1.00 | 0.00 | C |
| ATOM | 284 | H    | TYR | N | 29 | -5.325 | -3.628  | -16.986 | 1.00 | 0.00 | H |
| ATOM | 285 | C    | THR | N | 28 | -3.537 | -4.542  | -17.426 | 1.00 | 0.00 | C |
| ATOM | 286 | HB1  | TYR | N | 29 | -5.759 | -1.112  | -17.555 | 1.00 | 0.00 | H |
| ATOM | 287 | HB2  | TYR | N | 29 | -6.313 | -2.239  | -18.786 | 1.00 | 0.00 | H |
| ATOM | 288 | CG   | TYR | N | 29 | -5.292 | -0.491  | -19.575 | 1.00 | 0.00 | C |
| ATOM | 289 | O    | ILE | N | 35 | -5.720 | -7.017  | -2.136  | 1.00 | 0.00 | O |
| ATOM | 290 | HB   | ILE | N | 35 | -2.276 | -8.158  | -2.040  | 1.00 | 0.00 | H |
| ATOM | 291 | CG2  | ILE | N | 35 | -1.366 | -7.297  | -3.789  | 1.00 | 0.00 | C |
| ATOM | 292 | CG1  | ILE | N | 35 | -2.628 | -6.041  | -1.932  | 1.00 | 0.00 | C |
| ATOM | 293 | CD   | PRO | N | 36 | -4.429 | -10.420 | -2.370  | 1.00 | 0.00 | C |
| ATOM | 294 | HB1  | PRO | N | 36 | -5.980 | -11.179 | 0.509   | 1.00 | 0.00 | H |
| ATOM | 295 | HB2  | PRO | N | 36 | -6.865 | -11.420 | -1.009  | 1.00 | 0.00 | H |
| ATOM | 296 | CG   | PRO | N | 36 | -4.681 | -11.427 | -1.248  | 1.00 | 0.00 | C |
| ATOM | 297 | HB1  | TYR | N | 44 | 1.834  | -2.023  | -6.455  | 1.00 | 0.00 | H |

|      |     |      |     |   |    |        |         |         |      |      |   |
|------|-----|------|-----|---|----|--------|---------|---------|------|------|---|
| ATOM | 298 | HB2  | TYR | N | 44 | 2.702  | -2.983  | -5.260  | 1.00 | 0.00 | H |
| ATOM | 299 | CG   | TYR | N | 44 | 3.240  | -3.355  | -7.331  | 1.00 | 0.00 | C |
| ATOM | 300 | O    | TYR | N | 44 | 2.169  | -0.335  | -4.443  | 1.00 | 0.00 | O |
| ATOM | 301 | N    | ALA | N | 45 | 4.050  | 0.858   | -4.931  | 1.00 | 0.00 | N |
| ATOM | 302 | HB1  | ALA | N | 9  | 0.215  | 1.862   | -13.147 | 1.00 | 0.00 | H |
| ATOM | 303 | HB2  | ALA | N | 9  | 1.673  | 2.580   | -13.856 | 1.00 | 0.00 | H |
| ATOM | 304 | HB3  | ALA | N | 9  | 1.330  | 2.825   | -12.127 | 1.00 | 0.00 | H |
| ATOM | 305 | O    | ALA | N | 9  | -2.279 | 3.795   | -12.985 | 1.00 | 0.00 | O |
| ATOM | 306 | N    | ARG | N | 10 | -1.010 | 4.807   | -11.394 | 1.00 | 0.00 | N |
| ATOM | 307 | O    | THR | N | 28 | -2.536 | -4.556  | -18.164 | 1.00 | 0.00 | O |
| ATOM | 308 | CA   | THR | N | 28 | -3.762 | -5.720  | -16.464 | 1.00 | 0.00 | C |
| ATOM | 309 | CD1  | TYR | N | 29 | -5.055 | -0.861  | -20.904 | 1.00 | 0.00 | C |
| ATOM | 310 | CD2  | TYR | N | 29 | -5.213 | 0.870   | -19.257 | 1.00 | 0.00 | C |
| ATOM | 311 | HG21 | ILE | N | 35 | -0.376 | -7.209  | -3.324  | 1.00 | 0.00 | H |
| ATOM | 312 | HG22 | ILE | N | 35 | -1.343 | -8.212  | -4.401  | 1.00 | 0.00 | H |
| ATOM | 313 | HG23 | ILE | N | 35 | -1.489 | -6.451  | -4.484  | 1.00 | 0.00 | H |
| ATOM | 314 | HG11 | ILE | N | 35 | -3.509 | -6.115  | -1.276  | 1.00 | 0.00 | H |
| ATOM | 315 | HG12 | ILE | N | 35 | -2.827 | -5.200  | -2.621  | 1.00 | 0.00 | H |
| ATOM | 316 | CD1  | ILE | N | 35 | -1.414 | -5.709  | -1.066  | 1.00 | 0.00 | C |
| ATOM | 317 | HD1  | PRO | N | 36 | -3.361 | -10.264 | -2.536  | 1.00 | 0.00 | H |
| ATOM | 318 | HD2  | PRO | N | 36 | -4.908 | -10.711 | -3.320  | 1.00 | 0.00 | H |
| ATOM | 319 | HG1  | PRO | N | 36 | -3.855 | -11.401 | -0.530  | 1.00 | 0.00 | H |
| ATOM | 320 | HG2  | PRO | N | 36 | -4.763 | -12.455 | -1.629  | 1.00 | 0.00 | H |
| ATOM | 321 | CD1  | TYR | N | 44 | 2.664  | -3.183  | -8.592  | 1.00 | 0.00 | C |
| ATOM | 322 | CD2  | TYR | N | 44 | 4.223  | -4.344  | -7.182  | 1.00 | 0.00 | C |
| ATOM | 323 | H    | ALA | N | 45 | 4.840  | 0.978   | -5.579  | 1.00 | 0.00 | H |
| ATOM | 324 | CA   | ALA | N | 45 | 3.945  | 1.800   | -3.839  | 1.00 | 0.00 | C |
| ATOM | 325 | H    | ARG | N | 10 | -0.067 | 5.076   | -11.110 | 1.00 | 0.00 | H |
| ATOM | 326 | CA   | ARG | N | 10 | -2.135 | 5.212   | -10.551 | 1.00 | 0.00 | C |
| ATOM | 327 | HA   | THR | N | 28 | -2.738 | -6.005  | -16.187 | 1.00 | 0.00 | H |
| ATOM | 328 | N    | THR | N | 28 | -4.470 | -5.307  | -15.261 | 1.00 | 0.00 | N |
| ATOM | 329 | CB   | THR | N | 28 | -4.390 | -6.938  | -17.163 | 1.00 | 0.00 | C |
| ATOM | 330 | HD1  | TYR | N | 29 | -5.086 | -1.913  | -21.185 | 1.00 | 0.00 | H |
| ATOM | 331 | CE1  | TYR | N | 29 | -4.737 | 0.074   | -21.881 | 1.00 | 0.00 | C |
| ATOM | 332 | HD2  | TYR | N | 29 | -5.391 | 1.193   | -18.229 | 1.00 | 0.00 | H |
| ATOM | 333 | CE2  | TYR | N | 29 | -4.889 | 1.824   | -20.222 | 1.00 | 0.00 | C |
| ATOM | 334 | HD11 | ILE | N | 35 | -0.502 | -5.564  | -1.663  | 1.00 | 0.00 | H |
| ATOM | 335 | HD12 | ILE | N | 35 | -1.206 | -6.505  | -0.336  | 1.00 | 0.00 | H |
| ATOM | 336 | HD13 | ILE | N | 35 | -1.586 | -4.783  | -0.498  | 1.00 | 0.00 | H |
| ATOM | 337 | HD1  | TYR | N | 44 | 1.888  | -2.427  | -8.724  | 1.00 | 0.00 | H |
| ATOM | 338 | CE1  | TYR | N | 44 | 3.028  | -3.972  | -9.678  | 1.00 | 0.00 | C |
| ATOM | 339 | HD2  | TYR | N | 44 | 4.703  | -4.507  | -6.218  | 1.00 | 0.00 | H |
| ATOM | 340 | CE2  | TYR | N | 44 | 4.594  | -5.150  | -8.254  | 1.00 | 0.00 | C |
| ATOM | 341 | HA   | ALA | N | 45 | 3.505  | 1.267   | -2.983  | 1.00 | 0.00 | H |
| ATOM | 342 | C    | ALA | N | 45 | 3.025  | 2.978   | -4.134  | 1.00 | 0.00 | C |
| ATOM | 343 | CB   | ALA | N | 45 | 5.343  | 2.326   | -3.501  | 1.00 | 0.00 | C |
| ATOM | 344 | HA   | ARG | N | 10 | -2.747 | 4.328   | -10.340 | 1.00 | 0.00 | H |
| ATOM | 345 | C    | ARG | N | 10 | -3.086 | 6.191   | -11.248 | 1.00 | 0.00 | C |
| ATOM | 346 | CB   | ARG | N | 10 | -1.615 | 5.831   | -9.242  | 1.00 | 0.00 | C |
| ATOM | 347 | H    | THR | N | 28 | -5.450 | -5.571  | -15.129 | 1.00 | 0.00 | H |
| ATOM | 348 | C    | ALA | N | 27 | -3.856 | -4.419  | -14.449 | 1.00 | 0.00 | C |
| ATOM | 349 | HB   | THR | N | 28 | -3.822 | -7.046  | -18.107 | 1.00 | 0.00 | H |
| ATOM | 350 | OG1  | THR | N | 28 | -5.749 | -6.635  | -17.442 | 1.00 | 0.00 | O |
| ATOM | 351 | CG2  | THR | N | 28 | -4.246 | -8.241  | -16.381 | 1.00 | 0.00 | C |
| ATOM | 352 | HE1  | TYR | N | 29 | -4.548 | -0.248  | -22.902 | 1.00 | 0.00 | H |
| ATOM | 353 | CZ   | TYR | N | 29 | -4.624 | 1.433   | -21.543 | 1.00 | 0.00 | C |
| ATOM | 354 | HE2  | TYR | N | 29 | -4.809 | 2.881   | -19.963 | 1.00 | 0.00 | H |
| ATOM | 355 | HE1  | TYR | N | 44 | 2.548  | -3.819  | -10.640 | 1.00 | 0.00 | H |
| ATOM | 356 | CZ   | TYR | N | 44 | 3.983  | -4.980  | -9.504  | 1.00 | 0.00 | C |
| ATOM | 357 | HE2  | TYR | N | 44 | 5.355  | -5.920  | -8.129  | 1.00 | 0.00 | H |
| ATOM | 358 | O    | ALA | N | 45 | 2.772  | 3.797   | -3.219  | 1.00 | 0.00 | O |
| ATOM | 359 | N    | ASN | N | 46 | 2.587  | 3.118   | -5.376  | 1.00 | 0.00 | N |
| ATOM | 360 | HB1  | ALA | N | 45 | 5.357  | 2.881   | -2.562  | 1.00 | 0.00 | H |

|      |     |      |     |   |    |        |        |         |      |      |   |
|------|-----|------|-----|---|----|--------|--------|---------|------|------|---|
| ATOM | 361 | HB2  | ALA | N | 45 | 5.687  | 3.008  | -4.288  | 1.00 | 0.00 | H |
| ATOM | 362 | HB3  | ALA | N | 45 | 6.056  | 1.495  | -3.422  | 1.00 | 0.00 | H |
| ATOM | 363 | O    | ARG | N | 10 | -4.316 | 6.018  | -11.172 | 1.00 | 0.00 | O |
| ATOM | 364 | N    | SER | N | 11 | -2.540 | 7.241  | -11.882 | 1.00 | 0.00 | N |
| ATOM | 365 | HB1  | ARG | N | 10 | -1.054 | 5.063  | -8.693  | 1.00 | 0.00 | H |
| ATOM | 366 | HB2  | ARG | N | 10 | -0.895 | 6.620  | -9.499  | 1.00 | 0.00 | H |
| ATOM | 367 | CG   | ARG | N | 10 | -2.694 | 6.456  | -8.349  | 1.00 | 0.00 | C |
| ATOM | 368 | O    | ALA | N | 27 | -2.691 | -4.047 | -14.667 | 1.00 | 0.00 | O |
| ATOM | 369 | CA   | ALA | N | 27 | -4.626 | -3.892 | -13.226 | 1.00 | 0.00 | C |
| ATOM | 370 | HG1  | THR | N | 28 | -6.009 | -7.269 | -18.155 | 1.00 | 0.00 | H |
| ATOM | 371 | HG21 | THR | N | 28 | -4.661 | -9.068 | -16.975 | 1.00 | 0.00 | H |
| ATOM | 372 | HG22 | THR | N | 28 | -3.191 | -8.493 | -16.202 | 1.00 | 0.00 | H |
| ATOM | 373 | HG23 | THR | N | 28 | -4.786 | -8.196 | -15.425 | 1.00 | 0.00 | H |
| ATOM | 374 | OH   | TYR | N | 29 | -4.247 | 2.373  | -22.441 | 1.00 | 0.00 | O |
| ATOM | 375 | OH   | TYR | N | 44 | 4.345  | -5.824 | -10.507 | 1.00 | 0.00 | O |
| ATOM | 376 | H    | ASN | N | 46 | 2.736  | 2.374  | -6.067  | 1.00 | 0.00 | H |
| ATOM | 377 | CA   | ASN | N | 46 | 1.877  | 4.292  | -5.837  | 1.00 | 0.00 | C |
| ATOM | 378 | H    | SER | N | 11 | -1.529 | 7.409  | -11.832 | 1.00 | 0.00 | H |
| ATOM | 379 | CA   | SER | N | 11 | -3.399 | 8.175  | -12.593 | 1.00 | 0.00 | C |
| ATOM | 380 | HG1  | ARG | N | 10 | -2.188 | 6.966  | -7.517  | 1.00 | 0.00 | H |
| ATOM | 381 | HG2  | ARG | N | 10 | -3.221 | 7.255  | -8.892  | 1.00 | 0.00 | H |
| ATOM | 382 | CD   | ARG | N | 10 | -3.751 | 5.513  | -7.782  | 1.00 | 0.00 | C |
| ATOM | 383 | HA   | ALA | N | 27 | -3.995 | -3.081 | -12.845 | 1.00 | 0.00 | H |
| ATOM | 384 | N    | ALA | N | 27 | -5.933 | -3.360 | -13.611 | 1.00 | 0.00 | N |
| ATOM | 385 | CB   | ALA | N | 27 | -4.789 | -4.978 | -12.158 | 1.00 | 0.00 | C |
| ATOM | 386 | HH   | TYR | N | 29 | -4.351 | 2.018  | -23.368 | 1.00 | 0.00 | H |
| ATOM | 387 | HH   | TYR | N | 44 | 3.841  | -5.627 | -11.336 | 1.00 | 0.00 | H |
| ATOM | 388 | HA   | ASN | N | 46 | 1.963  | 5.059  | -5.064  | 1.00 | 0.00 | H |
| ATOM | 389 | CB   | ASN | N | 46 | 2.560  | 4.826  | -7.105  | 1.00 | 0.00 | C |
| ATOM | 390 | C    | ASN | N | 46 | 0.366  | 4.035  | -5.977  | 1.00 | 0.00 | C |
| ATOM | 391 | HA   | SER | N | 11 | -4.129 | 8.593  | -11.890 | 1.00 | 0.00 | H |
| ATOM | 392 | CB   | SER | N | 11 | -2.602 | 9.316  | -13.231 | 1.00 | 0.00 | C |
| ATOM | 393 | C    | SER | N | 11 | -4.219 | 7.423  | -13.662 | 1.00 | 0.00 | C |
| ATOM | 394 | HD1  | ARG | N | 10 | -4.481 | 6.108  | -7.215  | 1.00 | 0.00 | H |
| ATOM | 395 | HD2  | ARG | N | 10 | -4.308 | 5.004  | -8.584  | 1.00 | 0.00 | H |
| ATOM | 396 | NE   | ARG | N | 10 | -3.134 | 4.515  | -6.906  | 1.00 | 0.00 | N |
| ATOM | 397 | H    | ALA | N | 27 | -6.769 | -3.795 | -13.204 | 1.00 | 0.00 | H |
| ATOM | 398 | C    | CYS | N | 26 | -6.086 | -2.275 | -14.369 | 1.00 | 0.00 | C |
| ATOM | 399 | HB1  | ALA | N | 27 | -5.501 | -5.743 | -12.480 | 1.00 | 0.00 | H |
| ATOM | 400 | HB2  | ALA | N | 27 | -3.820 | -5.454 | -11.972 | 1.00 | 0.00 | H |
| ATOM | 401 | HB3  | ALA | N | 27 | -5.152 | -4.537 | -11.218 | 1.00 | 0.00 | H |
| ATOM | 402 | HB1  | ASN | N | 46 | 2.403  | 4.142  | -7.942  | 1.00 | 0.00 | H |
| ATOM | 403 | HB2  | ASN | N | 46 | 2.126  | 5.799  | -7.363  | 1.00 | 0.00 | H |
| ATOM | 404 | CG   | ASN | N | 46 | 4.066  | 4.934  | -6.865  | 1.00 | 0.00 | C |
| ATOM | 405 | O    | ASN | N | 46 | -0.337 | 4.977  | -6.432  | 1.00 | 0.00 | O |
| ATOM | 406 | OXT  | ASN | N | 46 | -0.093 | 2.909  | -5.621  | 1.00 | 0.00 | O |
| ATOM | 407 | HB1  | SER | N | 11 | -3.327 | 9.978  | -13.729 | 1.00 | 0.00 | H |
| ATOM | 408 | HB2  | SER | N | 11 | -1.919 | 8.905  | -13.994 | 1.00 | 0.00 | H |
| ATOM | 409 | OG   | SER | N | 11 | -1.878 | 10.024 | -12.237 | 1.00 | 0.00 | O |
| ATOM | 410 | O    | SER | N | 11 | -5.448 | 7.626  | -13.806 | 1.00 | 0.00 | O |
| ATOM | 411 | N    | ASN | N | 12 | -3.552 | 6.548  | -14.409 | 1.00 | 0.00 | N |
| ATOM | 412 | HE   | ARG | N | 10 | -2.146 | 4.659  | -6.648  | 1.00 | 0.00 | H |
| ATOM | 413 | CZ   | ARG | N | 10 | -3.684 | 3.345  | -6.567  | 1.00 | 0.00 | C |
| ATOM | 414 | O    | CYS | N | 26 | -5.133 | -1.574 | -14.768 | 1.00 | 0.00 | O |
| ATOM | 415 | CA   | CYS | N | 26 | -7.506 | -1.891 | -14.823 | 1.00 | 0.00 | C |
| ATOM | 416 | OD1  | ASN | N | 46 | 4.849  | 4.176  | -7.465  | 1.00 | 0.00 | O |
| ATOM | 417 | ND2  | ASN | N | 46 | 4.480  | 5.829  | -5.957  | 1.00 | 0.00 | N |
| ATOM | 418 | H    | SER | N | 11 | -1.438 | 10.800 | -12.679 | 1.00 | 0.00 | H |
| ATOM | 419 | H    | ASN | N | 12 | -2.535 | 6.446  | -14.290 | 1.00 | 0.00 | H |
| ATOM | 420 | CA   | ASN | N | 12 | -4.225 | 5.761  | -15.431 | 1.00 | 0.00 | C |
| ATOM | 421 | NH1  | ARG | N | 10 | -4.978 | 3.099  | -6.809  | 1.00 | 0.00 | N |
| ATOM | 422 | NH2  | ARG | N | 10 | -2.901 | 2.393  | -6.032  | 1.00 | 0.00 | N |
| ATOM | 423 | HA   | CYS | N | 26 | -7.335 | -1.462 | -15.821 | 1.00 | 0.00 | H |

|      |     |      |     |   |    |         |        |         |      |      |   |
|------|-----|------|-----|---|----|---------|--------|---------|------|------|---|
| ATOM | 424 | N    | CYS | N | 26 | -8.369  | -3.043 | -14.955 | 1.00 | 0.00 | N |
| ATOM | 425 | CB   | CYS | N | 26 | -8.132  | -0.814 | -13.941 | 1.00 | 0.00 | C |
| ATOM | 426 | HD21 | ASN | N | 46 | 3.830   | 6.466  | -5.486  | 1.00 | 0.00 | H |
| ATOM | 427 | HD22 | ASN | N | 46 | 5.490   | 5.950  | -5.792  | 1.00 | 0.00 | H |
| ATOM | 428 | HA   | ASN | N | 12 | -4.766  | 6.438  | -16.105 | 1.00 | 0.00 | H |
| ATOM | 429 | CB   | ASN | N | 12 | -3.213  | 4.964  | -16.247 | 1.00 | 0.00 | C |
| ATOM | 430 | C    | ASN | N | 12 | -5.277  | 4.835  | -14.817 | 1.00 | 0.00 | C |
| ATOM | 431 | HH11 | ARG | N | 10 | -5.349  | 2.163  | -6.604  | 1.00 | 0.00 | H |
| ATOM | 432 | HH12 | ARG | N | 10 | -5.646  | 3.880  | -6.770  | 1.00 | 0.00 | H |
| ATOM | 433 | HH21 | ARG | N | 10 | -3.335  | 1.688  | -5.438  | 1.00 | 0.00 | H |
| ATOM | 434 | HH22 | ARG | N | 10 | -1.934  | 2.640  | -5.785  | 1.00 | 0.00 | H |
| ATOM | 435 | H    | CYS | N | 26 | -9.167  | -3.159 | -14.325 | 1.00 | 0.00 | H |
| ATOM | 436 | C    | LEU | N | 25 | -8.125  | -3.933 | -15.939 | 1.00 | 0.00 | C |
| ATOM | 437 | HB1  | CYS | N | 26 | -7.416  | -0.003 | -13.762 | 1.00 | 0.00 | H |
| ATOM | 438 | HB2  | CYS | N | 26 | -8.429  | -1.218 | -12.962 | 1.00 | 0.00 | H |
| ATOM | 439 | SG   | CYS | N | 26 | -9.688  | -0.129 | -14.642 | 1.00 | 0.00 | S |
| ATOM | 440 | HB1  | ASN | N | 12 | -2.593  | 4.327  | -15.599 | 1.00 | 0.00 | H |
| ATOM | 441 | HB2  | ASN | N | 12 | -3.772  | 4.292  | -16.918 | 1.00 | 0.00 | H |
| ATOM | 442 | CG   | ASN | N | 12 | -2.348  | 5.877  | -17.131 | 1.00 | 0.00 | C |
| ATOM | 443 | O    | ASN | N | 12 | -6.363  | 4.657  | -15.392 | 1.00 | 0.00 | O |
| ATOM | 444 | N    | PHE | N | 13 | -4.951  | 4.232  | -13.663 | 1.00 | 0.00 | N |
| ATOM | 445 | O    | LEU | N | 25 | -7.233  | -3.763 | -16.779 | 1.00 | 0.00 | O |
| ATOM | 446 | CA   | LEU | N | 25 | -8.993  | -5.193 | -15.973 | 1.00 | 0.00 | C |
| ATOM | 447 | SG   | CYS | N | 16 | -9.064  | 0.644  | -16.475 | 1.00 | 0.00 | S |
| ATOM | 448 | OD1  | ASN | N | 12 | -2.702  | 7.028  | -17.391 | 1.00 | 0.00 | O |
| ATOM | 449 | ND2  | ASN | N | 12 | -1.237  | 5.286  | -17.602 | 1.00 | 0.00 | N |
| ATOM | 450 | H    | PHE | N | 13 | -3.990  | 4.301  | -13.305 | 1.00 | 0.00 | H |
| ATOM | 451 | CA   | PHE | N | 13 | -5.873  | 3.355  | -12.962 | 1.00 | 0.00 | C |
| ATOM | 452 | HA   | LEU | N | 25 | -8.343  | -5.940 | -16.447 | 1.00 | 0.00 | H |
| ATOM | 453 | N    | LEU | N | 25 | -9.310  | -5.666 | -14.626 | 1.00 | 0.00 | N |
| ATOM | 454 | CB   | LEU | N | 25 | -10.277 | -4.981 | -16.788 | 1.00 | 0.00 | C |
| ATOM | 455 | CB   | CYS | N | 16 | -8.578  | 2.362  | -16.060 | 1.00 | 0.00 | C |
| ATOM | 456 | HD21 | ASN | N | 12 | -1.001  | 4.335  | -17.319 | 1.00 | 0.00 | H |
| ATOM | 457 | HD22 | ASN | N | 12 | -0.686  | 5.756  | -18.331 | 1.00 | 0.00 | H |
| ATOM | 458 | HA   | PHE | N | 13 | -6.181  | 2.529  | -13.621 | 1.00 | 0.00 | H |
| ATOM | 459 | C    | PHE | N | 13 | -7.163  | 4.097  | -12.615 | 1.00 | 0.00 | C |
| ATOM | 460 | CB   | PHE | N | 13 | -5.193  | 2.780  | -11.701 | 1.00 | 0.00 | C |
| ATOM | 461 | H    | LEU | N | 25 | -10.163 | -5.321 | -14.184 | 1.00 | 0.00 | H |
| ATOM | 462 | C    | ALA | N | 24 | -8.344  | -6.148 | -13.822 | 1.00 | 0.00 | C |
| ATOM | 463 | HB1  | LEU | N | 25 | -10.999 | -4.442 | -16.154 | 1.00 | 0.00 | H |
| ATOM | 464 | HB2  | LEU | N | 25 | -10.047 | -4.308 | -17.631 | 1.00 | 0.00 | H |
| ATOM | 465 | CG   | LEU | N | 25 | -10.902 | -6.281 | -17.326 | 1.00 | 0.00 | C |
| ATOM | 466 | HB1  | CYS | N | 16 | -8.146  | 2.372  | -15.050 | 1.00 | 0.00 | H |
| ATOM | 467 | HB2  | CYS | N | 16 | -7.778  | 2.627  | -16.768 | 1.00 | 0.00 | H |
| ATOM | 468 | CA   | CYS | N | 16 | -9.702  | 3.408  | -16.156 | 1.00 | 0.00 | C |
| ATOM | 469 | O    | PHE | N | 13 | -8.271  | 3.608  | -12.872 | 1.00 | 0.00 | O |
| ATOM | 470 | N    | ASN | N | 14 | -7.016  | 5.290  | -12.001 | 1.00 | 0.00 | N |
| ATOM | 471 | HB1  | PHE | N | 13 | -4.220  | 2.376  | -12.005 | 1.00 | 0.00 | H |
| ATOM | 472 | HB2  | PHE | N | 13 | -4.993  | 3.603  | -11.001 | 1.00 | 0.00 | H |
| ATOM | 473 | CG   | PHE | N | 13 | -6.013  | 1.695  | -11.050 | 1.00 | 0.00 | C |
| ATOM | 474 | O    | ALA | N | 24 | -7.181  | -6.319 | -14.231 | 1.00 | 0.00 | O |
| ATOM | 475 | CA   | ALA | N | 24 | -8.740  | -6.528 | -12.387 | 1.00 | 0.00 | C |
| ATOM | 476 | HG   | LEU | N | 25 | -10.953 | -6.995 | -16.488 | 1.00 | 0.00 | H |
| ATOM | 477 | CD1  | LEU | N | 25 | -10.043 | -6.912 | -18.427 | 1.00 | 0.00 | C |
| ATOM | 478 | CD2  | LEU | N | 25 | -12.340 | -6.034 | -17.802 | 1.00 | 0.00 | C |
| ATOM | 479 | HA   | CYS | N | 16 | -10.060 | 3.478  | -17.192 | 1.00 | 0.00 | H |
| ATOM | 480 | N    | CYS | N | 16 | -9.135  | 4.681  | -15.733 | 1.00 | 0.00 | N |
| ATOM | 481 | C    | CYS | N | 16 | -10.956 | 3.033  | -15.341 | 1.00 | 0.00 | C |
| ATOM | 482 | H    | ASN | N | 14 | -6.077  | 5.657  | -11.807 | 1.00 | 0.00 | H |
| ATOM | 483 | CA   | ASN | N | 14 | -8.202  | 6.023  | -11.599 | 1.00 | 0.00 | C |
| ATOM | 484 | CD2  | PHE | N | 13 | -6.975  | 1.984  | -10.072 | 1.00 | 0.00 | C |
| ATOM | 485 | CD1  | PHE | N | 13 | -5.842  | 0.364  | -11.460 | 1.00 | 0.00 | C |
| ATOM | 486 | HA   | ALA | N | 24 | -7.796  | -6.550 | -11.828 | 1.00 | 0.00 | H |



|      |     |      |     |   |    |         |        |         |      |      |   |
|------|-----|------|-----|---|----|---------|--------|---------|------|------|---|
| ATOM | 487 | N    | ALA | N | 24 | -9.628  | -5.528 | -11.806 | 1.00 | 0.00 | N |
| ATOM | 488 | CB   | ALA | N | 24 | -9.387  | -7.913 | -12.325 | 1.00 | 0.00 | C |
| ATOM | 489 | HD11 | LEU | N | 25 | -10.492 | -7.841 | -18.803 | 1.00 | 0.00 | H |
| ATOM | 490 | HD12 | LEU | N | 25 | -9.031  | -7.165 | -18.081 | 1.00 | 0.00 | H |
| ATOM | 491 | HD13 | LEU | N | 25 | -9.932  | -6.231 | -19.286 | 1.00 | 0.00 | H |
| ATOM | 492 | HD21 | LEU | N | 25 | -12.986 | -5.698 | -16.977 | 1.00 | 0.00 | H |
| ATOM | 493 | HD22 | LEU | N | 25 | -12.792 | -6.949 | -18.214 | 1.00 | 0.00 | H |
| ATOM | 494 | HD23 | LEU | N | 25 | -12.377 | -5.258 | -18.587 | 1.00 | 0.00 | H |
| ATOM | 495 | H    | CYS | N | 16 | -8.144  | 4.702  | -15.461 | 1.00 | 0.00 | H |
| ATOM | 496 | C    | VAL | N | 15 | -9.865  | 5.810  | -15.687 | 1.00 | 0.00 | C |
| ATOM | 497 | O    | CYS | N | 16 | -11.927 | 2.475  | -15.875 | 1.00 | 0.00 | O |
| ATOM | 498 | N    | ARG | N | 17 | -10.930 | 3.365  | -14.040 | 1.00 | 0.00 | N |
| ATOM | 499 | HA   | ASN | N | 14 | -8.851  | 5.341  | -11.035 | 1.00 | 0.00 | H |
| ATOM | 500 | CB   | ASN | N | 14 | -7.874  | 7.238  | -10.729 | 1.00 | 0.00 | C |
| ATOM | 501 | C    | ASN | N | 14 | -9.052  | 6.432  | -12.814 | 1.00 | 0.00 | C |
| ATOM | 502 | HD2  | PHE | N | 13 | -7.134  | 3.015  | -9.746  | 1.00 | 0.00 | H |
| ATOM | 503 | CE2  | PHE | N | 13 | -7.754  | 0.963  | -9.524  | 1.00 | 0.00 | C |
| ATOM | 504 | HD1  | PHE | N | 13 | -5.097  | 0.143  | -12.227 | 1.00 | 0.00 | H |
| ATOM | 505 | CE1  | PHE | N | 13 | -6.616  | -0.659 | -10.913 | 1.00 | 0.00 | C |
| ATOM | 506 | H    | ALA | N | 24 | -10.452 | -5.869 | -11.276 | 1.00 | 0.00 | H |
| ATOM | 507 | C    | GLU | N | 23 | -9.180  | -4.275 | -11.592 | 1.00 | 0.00 | C |
| ATOM | 508 | HB1  | ALA | N | 24 | -8.727  | -8.655 | -12.787 | 1.00 | 0.00 | H |
| ATOM | 509 | HB2  | ALA | N | 24 | -9.555  | -8.197 | -11.278 | 1.00 | 0.00 | H |
| ATOM | 510 | HB3  | ALA | N | 24 | -10.355 | -7.932 | -12.841 | 1.00 | 0.00 | H |
| ATOM | 511 | O    | VAL | N | 15 | -11.053 | 5.854  | -16.039 | 1.00 | 0.00 | O |
| ATOM | 512 | CA   | VAL | N | 15 | -9.155  | 7.071  | -15.167 | 1.00 | 0.00 | C |
| ATOM | 513 | H    | ARG | N | 17 | -10.060 | 3.724  | -13.637 | 1.00 | 0.00 | H |
| ATOM | 514 | CA   | ARG | N | 17 | -12.041 | 3.089  | -13.150 | 1.00 | 0.00 | C |
| ATOM | 515 | HB1  | ASN | N | 14 | -7.230  | 7.954  | -11.258 | 1.00 | 0.00 | H |
| ATOM | 516 | HB2  | ASN | N | 14 | -8.830  | 7.748  | -10.522 | 1.00 | 0.00 | H |
| ATOM | 517 | CG   | ASN | N | 14 | -7.293  | 6.896  | -9.362  | 1.00 | 0.00 | C |
| ATOM | 518 | O    | ASN | N | 14 | -10.293 | 6.410  | -12.737 | 1.00 | 0.00 | O |
| ATOM | 519 | N    | VAL | N | 15 | -8.413  | 6.802  | -13.936 | 1.00 | 0.00 | N |
| ATOM | 520 | HE2  | PHE | N | 13 | -8.506  | 1.204  | -8.769  | 1.00 | 0.00 | H |
| ATOM | 521 | CZ   | PHE | N | 13 | -7.581  | -0.355 | -9.951  | 1.00 | 0.00 | C |
| ATOM | 522 | HE1  | PHE | N | 13 | -6.492  | -1.692 | -11.246 | 1.00 | 0.00 | H |
| ATOM | 523 | O    | GLU | N | 23 | -8.052  | -3.892 | -11.937 | 1.00 | 0.00 | O |
| ATOM | 524 | CA   | GLU | N | 23 | -10.113 | -3.301 | -10.863 | 1.00 | 0.00 | C |
| ATOM | 525 | HA   | VAL | N | 15 | -9.978  | 7.759  | -14.933 | 1.00 | 0.00 | H |
| ATOM | 526 | CB   | VAL | N | 15 | -8.237  | 7.726  | -16.224 | 1.00 | 0.00 | C |
| ATOM | 527 | HA   | ARG | N | 17 | -12.470 | 2.108  | -13.412 | 1.00 | 0.00 | H |
| ATOM | 528 | C    | ARG | N | 17 | -13.210 | 4.059  | -13.323 | 1.00 | 0.00 | C |
| ATOM | 529 | CB   | ARG | N | 17 | -11.564 | 3.087  | -11.688 | 1.00 | 0.00 | C |
| ATOM | 530 | OD1  | ASN | N | 14 | -7.650  | 5.854  | -8.756  | 1.00 | 0.00 | O |
| ATOM | 531 | ND2  | ASN | N | 14 | -6.466  | 7.789  | -8.835  | 1.00 | 0.00 | N |
| ATOM | 532 | H    | VAL | N | 15 | -7.390  | 6.798  | -13.962 | 1.00 | 0.00 | H |
| ATOM | 533 | HZ   | PHE | N | 13 | -8.192  | -1.152 | -9.531  | 1.00 | 0.00 | H |
| ATOM | 534 | HA   | GLU | N | 23 | -9.744  | -2.305 | -11.152 | 1.00 | 0.00 | H |
| ATOM | 535 | N    | GLU | N | 23 | -11.489 | -3.450 | -11.301 | 1.00 | 0.00 | N |
| ATOM | 536 | CB   | GLU | N | 23 | -9.956  | -3.480 | -9.342  | 1.00 | 0.00 | C |
| ATOM | 537 | HB   | VAL | N | 15 | -7.303  | 7.139  | -16.254 | 1.00 | 0.00 | H |
| ATOM | 538 | CG2  | VAL | N | 15 | -7.910  | 9.158  | -15.801 | 1.00 | 0.00 | C |
| ATOM | 539 | CG1  | VAL | N | 15 | -8.864  | 7.687  | -17.619 | 1.00 | 0.00 | C |
| ATOM | 540 | O    | ARG | N | 17 | -14.324 | 3.736  | -12.851 | 1.00 | 0.00 | O |
| ATOM | 541 | N    | LEU | N | 18 | -13.037 | 5.221  | -13.961 | 1.00 | 0.00 | N |
| ATOM | 542 | HB1  | ARG | N | 17 | -11.080 | 4.048  | -11.480 | 1.00 | 0.00 | H |
| ATOM | 543 | HB2  | ARG | N | 17 | -12.444 | 3.044  | -11.030 | 1.00 | 0.00 | H |
| ATOM | 544 | CG   | ARG | N | 17 | -10.601 | 1.944  | -11.360 | 1.00 | 0.00 | C |
| ATOM | 545 | HD21 | ASN | N | 14 | -6.183  | 7.683  | -7.858  | 1.00 | 0.00 | H |
| ATOM | 546 | HD22 | ASN | N | 14 | -6.118  | 8.622  | -9.359  | 1.00 | 0.00 | H |
| ATOM | 547 | H    | GLU | N | 23 | -12.214 | -3.697 | -10.603 | 1.00 | 0.00 | H |
| ATOM | 548 | C    | PRO | N | 22 | -11.794 | -3.470 | -12.610 | 1.00 | 0.00 | C |
| ATOM | 549 | HB1  | GLU | N | 23 | -10.331 | -4.471 | -9.063  | 1.00 | 0.00 | H |

|      |     |      |     |   |    |         |        |         |      |      |   |
|------|-----|------|-----|---|----|---------|--------|---------|------|------|---|
| ATOM | 550 | HB2  | GLU | N | 23 | -8.876  | -3.493 | -9.132  | 1.00 | 0.00 | H |
| ATOM | 551 | CG   | GLU | N | 23 | -10.637 | -2.411 | -8.486  | 1.00 | 0.00 | C |
| ATOM | 552 | HG21 | VAL | N | 15 | -7.435  | 9.191  | -14.815 | 1.00 | 0.00 | H |
| ATOM | 553 | HG22 | VAL | N | 15 | -7.223  | 9.645  | -16.503 | 1.00 | 0.00 | H |
| ATOM | 554 | HG23 | VAL | N | 15 | -8.829  | 9.765  | -15.750 | 1.00 | 0.00 | H |
| ATOM | 555 | HG11 | VAL | N | 15 | -8.228  | 8.221  | -18.335 | 1.00 | 0.00 | H |
| ATOM | 556 | HG12 | VAL | N | 15 | -8.989  | 6.656  | -17.983 | 1.00 | 0.00 | H |
| ATOM | 557 | HG13 | VAL | N | 15 | -9.858  | 8.162  | -17.634 | 1.00 | 0.00 | H |
| ATOM | 558 | H    | LEU | N | 18 | -12.139 | 5.444  | -14.396 | 1.00 | 0.00 | H |
| ATOM | 559 | CA   | LEU | N | 18 | -14.128 | 6.182  | -14.096 | 1.00 | 0.00 | C |
| ATOM | 560 | HG1  | ARG | N | 17 | -9.809  | 1.869  | -12.117 | 1.00 | 0.00 | H |
| ATOM | 561 | HG2  | ARG | N | 17 | -10.087 | 2.206  | -10.424 | 1.00 | 0.00 | H |
| ATOM | 562 | CD   | ARG | N | 17 | -11.274 | 0.581  | -11.219 | 1.00 | 0.00 | C |
| ATOM | 563 | O    | PRO | N | 22 | -10.949 | -3.338 | -13.516 | 1.00 | 0.00 | O |
| ATOM | 564 | CA   | PRO | N | 22 | -13.242 | -3.821 | -12.914 | 1.00 | 0.00 | C |
| ATOM | 565 | HG1  | GLU | N | 23 | -10.332 | -1.399 | -8.786  | 1.00 | 0.00 | H |
| ATOM | 566 | HG2  | GLU | N | 23 | -11.729 | -2.454 | -8.622  | 1.00 | 0.00 | H |
| ATOM | 567 | CD   | GLU | N | 23 | -10.382 | -2.546 | -6.985  | 1.00 | 0.00 | C |
| ATOM | 568 | HA   | LEU | N | 18 | -14.506 | 6.409  | -13.089 | 1.00 | 0.00 | H |
| ATOM | 569 | CB   | LEU | N | 18 | -13.668 | 7.476  | -14.776 | 1.00 | 0.00 | C |
| ATOM | 570 | C    | LEU | N | 18 | -15.369 | 5.618  | -14.803 | 1.00 | 0.00 | C |
| ATOM | 571 | HD1  | ARG | N | 17 | -11.907 | 0.356  | -12.086 | 1.00 | 0.00 | H |
| ATOM | 572 | HD2  | ARG | N | 17 | -10.501 | -0.208 | -11.188 | 1.00 | 0.00 | H |
| ATOM | 573 | NE   | ARG | N | 17 | -12.067 | 0.542  | -9.997  | 1.00 | 0.00 | N |
| ATOM | 574 | HA   | PRO | N | 22 | -13.874 | -3.601 | -12.043 | 1.00 | 0.00 | H |
| ATOM | 575 | N    | PRO | N | 22 | -13.767 | -3.116 | -14.091 | 1.00 | 0.00 | N |
| ATOM | 576 | CB   | PRO | N | 22 | -13.375 | -5.302 | -13.297 | 1.00 | 0.00 | C |
| ATOM | 577 | OE2  | GLU | N | 23 | -10.531 | -1.496 | -6.287  | 1.00 | 0.00 | O |
| ATOM | 578 | OE1  | GLU | N | 23 | -10.066 | -3.678 | -6.501  | 1.00 | 0.00 | O |
| ATOM | 579 | HB1  | LEU | N | 18 | -14.571 | 8.034  | -15.058 | 1.00 | 0.00 | H |
| ATOM | 580 | HB2  | LEU | N | 18 | -13.145 | 7.223  | -15.710 | 1.00 | 0.00 | H |
| ATOM | 581 | CG   | LEU | N | 18 | -12.774 | 8.406  | -13.935 | 1.00 | 0.00 | C |
| ATOM | 582 | O    | LEU | N | 18 | -16.498 | 5.929  | -14.362 | 1.00 | 0.00 | O |
| ATOM | 583 | N    | PRO | N | 19 | -15.259 | 4.807  | -15.872 | 1.00 | 0.00 | N |
| ATOM | 584 | HE   | ARG | N | 17 | -11.615 | 0.879  | -9.135  | 1.00 | 0.00 | H |
| ATOM | 585 | CZ   | ARG | N | 17 | -13.204 | -0.131 | -9.764  | 1.00 | 0.00 | C |
| ATOM | 586 | C    | THR | N | 21 | -13.628 | -1.786 | -14.191 | 1.00 | 0.00 | C |
| ATOM | 587 | CD   | PRO | N | 22 | -14.570 | -4.007 | -14.955 | 1.00 | 0.00 | C |
| ATOM | 588 | HB1  | PRO | N | 22 | -13.456 | -5.939 | -12.410 | 1.00 | 0.00 | H |
| ATOM | 589 | HB2  | PRO | N | 22 | -12.499 | -5.604 | -13.894 | 1.00 | 0.00 | H |
| ATOM | 590 | CG   | PRO | N | 22 | -14.638 | -5.311 | -14.154 | 1.00 | 0.00 | C |
| ATOM | 591 | HG   | LEU | N | 18 | -11.847 | 7.867  | -13.682 | 1.00 | 0.00 | H |
| ATOM | 592 | CD1  | LEU | N | 18 | -12.407 | 9.606  | -14.817 | 1.00 | 0.00 | C |
| ATOM | 593 | CD2  | LEU | N | 18 | -13.440 | 8.839  | -12.624 | 1.00 | 0.00 | C |
| ATOM | 594 | CA   | PRO | N | 19 | -16.468 | 4.173  | -16.423 | 1.00 | 0.00 | C |
| ATOM | 595 | CD   | PRO | N | 19 | -14.109 | 4.716  | -16.813 | 1.00 | 0.00 | C |
| ATOM | 596 | NH1  | ARG | N | 17 | -13.874 | -0.775 | -10.716 | 1.00 | 0.00 | N |
| ATOM | 597 | NH2  | ARG | N | 17 | -13.676 | -0.116 | -8.506  | 1.00 | 0.00 | N |
| ATOM | 598 | O    | THR | N | 21 | -13.034 | -1.116 | -13.330 | 1.00 | 0.00 | O |
| ATOM | 599 | CA   | THR | N | 21 | -14.110 | -1.066 | -15.459 | 1.00 | 0.00 | C |
| ATOM | 600 | HD1  | PRO | N | 22 | -15.565 | -3.581 | -15.131 | 1.00 | 0.00 | H |
| ATOM | 601 | HD2  | PRO | N | 22 | -14.064 | -4.141 | -15.925 | 1.00 | 0.00 | H |
| ATOM | 602 | HG1  | PRO | N | 22 | -14.721 | -6.188 | -14.802 | 1.00 | 0.00 | H |
| ATOM | 603 | HG2  | PRO | N | 22 | -15.517 | -5.282 | -13.501 | 1.00 | 0.00 | H |
| ATOM | 604 | HD11 | LEU | N | 18 | -11.735 | 10.305 | -14.299 | 1.00 | 0.00 | H |
| ATOM | 605 | HD12 | LEU | N | 18 | -11.901 | 9.279  | -15.738 | 1.00 | 0.00 | H |
| ATOM | 606 | HD13 | LEU | N | 18 | -13.303 | 10.172 | -15.119 | 1.00 | 0.00 | H |
| ATOM | 607 | HD21 | LEU | N | 18 | -12.826 | 9.581  | -12.093 | 1.00 | 0.00 | H |
| ATOM | 608 | HD22 | LEU | N | 18 | -13.578 | 7.994  | -11.932 | 1.00 | 0.00 | H |
| ATOM | 609 | HD23 | LEU | N | 18 | -14.426 | 9.295  | -12.802 | 1.00 | 0.00 | H |
| ATOM | 610 | HA   | PRO | N | 19 | -17.311 | 4.878  | -16.413 | 1.00 | 0.00 | H |
| ATOM | 611 | C    | PRO | N | 19 | -16.945 | 2.943  | -15.646 | 1.00 | 0.00 | C |
| ATOM | 612 | CB   | PRO | N | 19 | -16.067 | 3.769  | -17.850 | 1.00 | 0.00 | C |

|      |     |      |     |   |    |         |        |         |      |      |   |
|------|-----|------|-----|---|----|---------|--------|---------|------|------|---|
| ATOM | 613 | HD1  | PRO | N | 19 | -13.179 | 4.475  | -16.299 | 1.00 | 0.00 | H |
| ATOM | 614 | HD2  | PRO | N | 19 | -13.988 | 5.692  | -17.310 | 1.00 | 0.00 | H |
| ATOM | 615 | CG   | PRO | N | 19 | -14.545 | 3.640  | -17.802 | 1.00 | 0.00 | C |
| ATOM | 616 | HH11 | ARG | N | 17 | -13.497 | -0.887 | -11.664 | 1.00 | 0.00 | H |
| ATOM | 617 | HH12 | ARG | N | 17 | -14.640 | -1.403 | -10.448 | 1.00 | 0.00 | H |
| ATOM | 618 | HH21 | ARG | N | 17 | -13.100 | 0.340  | -7.795  | 1.00 | 0.00 | H |
| ATOM | 619 | HH22 | ARG | N | 17 | -14.517 | -0.645 | -8.254  | 1.00 | 0.00 | H |
| ATOM | 620 | HA   | THR | N | 21 | -14.712 | -1.727 | -16.100 | 1.00 | 0.00 | H |
| ATOM | 621 | N    | THR | N | 21 | -14.893 | 0.096  | -15.087 | 1.00 | 0.00 | N |
| ATOM | 622 | CB   | THR | N | 21 | -12.848 | -0.597 | -16.220 | 1.00 | 0.00 | C |
| ATOM | 623 | O    | PRO | N | 19 | -17.986 | 2.380  | -16.021 | 1.00 | 0.00 | O |
| ATOM | 624 | N    | GLY | N | 20 | -16.185 | 2.495  | -14.631 | 1.00 | 0.00 | N |
| ATOM | 625 | HB1  | PRO | N | 19 | -16.351 | 4.553  | -18.552 | 1.00 | 0.00 | H |
| ATOM | 626 | HB2  | PRO | N | 19 | -16.568 | 2.847  | -18.156 | 1.00 | 0.00 | H |
| ATOM | 627 | HG1  | PRO | N | 19 | -14.099 | 3.791  | -18.792 | 1.00 | 0.00 | H |
| ATOM | 628 | HG2  | PRO | N | 19 | -14.246 | 2.649  | -17.437 | 1.00 | 0.00 | H |
| ATOM | 629 | H    | THR | N | 21 | -14.723 | 0.953  | -15.602 | 1.00 | 0.00 | H |
| ATOM | 630 | C    | GLY | N | 20 | -15.853 | 0.056  | -14.148 | 1.00 | 0.00 | C |
| ATOM | 631 | HB   | THR | N | 21 | -12.221 | -0.074 | -15.488 | 1.00 | 0.00 | H |
| ATOM | 632 | OG1  | THR | N | 21 | -13.238 | 0.349  | -17.221 | 1.00 | 0.00 | O |
| ATOM | 633 | CG2  | THR | N | 21 | -12.077 | -1.769 | -16.807 | 1.00 | 0.00 | C |
| ATOM | 634 | H    | GLY | N | 20 | -15.418 | 3.072  | -14.277 | 1.00 | 0.00 | H |
| ATOM | 635 | CA   | GLY | N | 20 | -16.561 | 1.360  | -13.811 | 1.00 | 0.00 | C |
| ATOM | 636 | O    | GLY | N | 20 | -16.140 | -0.980 | -13.537 | 1.00 | 0.00 | O |
| ATOM | 637 | HG1  | THR | N | 21 | -12.708 | 1.157  | -17.050 | 1.00 | 0.00 | H |
| ATOM | 638 | HG21 | THR | N | 21 | -11.237 | -1.400 | -17.411 | 1.00 | 0.00 | H |
| ATOM | 639 | HG22 | THR | N | 21 | -11.670 | -2.388 | -15.997 | 1.00 | 0.00 | H |
| ATOM | 640 | HG23 | THR | N | 21 | -12.713 | -2.394 | -17.452 | 1.00 | 0.00 | H |
| ATOM | 641 | HA1  | GLY | N | 20 | -17.638 | 1.168  | -13.902 | 1.00 | 0.00 | H |
| ATOM | 642 | HA2  | GLY | N | 20 | -16.322 | 1.586  | -12.763 | 1.00 | 0.00 | H |

END

## OPTIMIZED GEOMETRIES (CIF files)

### 1) CRAMBIN CRYSTAL – optimized 0W

```

data_CSD_CIF_MOLDRAW
_audit_creation_date 09-04-2015
_audit_creation_method MOLDRAW
_chemical_formula_sum 'H630 C404 N110 O128 S12'
_chemical_formula_moiety
;
H630 C404 N110 O128 S12
;
loop_
  _publ_author_name
  Delle Piane, Corno, Orlando, Dovesi, Ugliengo
  _cell_volume 14065.8965
  _exptl_crystal_density_diffn ?
  _diffn_ambient_temperature ?
  _refine_ls_R_factor_gt ?
  _refine_ls_wR_factor_gt ?
  _symmetry_space_group_name_H-M 'P 1'
  _symmetry_cell_setting monoclinic
  _symmetry_Int_Tables_number 1
loop_

```

```

_symmetry_equiv_pos_site_id
_symmetry_equiv_pos_as_xyz
1 x,y,z
_cell_length_a 21.0266844
_cell_length_b 17.3555897
_cell_length_c 38.5449471
_cell_angle_alpha 90
_cell_angle_beta 89.607206
_cell_angle_gamma 90
_cell_formula_units_Z 1
loop_
_atom_type_symbol
_atom_type_radius_bond
H .38
C .77
N .75
O .73
S 1.04
loop_
_atom_site_label
_atom_site_type_symbol
_atom_site_fract_x
_atom_site_fract_y
_atom_site_fract_z
H1 H 0.702089974494 0.658514332352 0.911637597984
H2 H 0.297910025506 0.158514332349 0.088362402016
H3 H 0.627837929245 0.663252073808 0.898066075843
H4 H 0.372162070755 0.163252073805 0.101933924157
H5 H 0.644961898031 0.688339416351 0.938998811756
H6 H 0.355038101969 0.188339416347 0.061001188244
H7 H 0.623130253893 0.795824295119 0.895039771713
H8 H 0.376869746107 0.295824295116 0.104960228287
H9 H 0.741923723408 0.802921225082 0.940805182944
H10 H 0.258076276592 0.302921225079 0.059194817056
H11 H 0.682954779765 0.751895748011 0.977551583502
H12 H 0.317045220235 0.251895748007 0.022448416498
H13 H 0.698942718698 0.932039958019 0.957508456053
H14 H 0.301057281302 0.432039958015 0.042491543947
H15 H 0.633566660662 0.919362784610 0.928921049516
H16 H 0.366433339338 0.419362784606 0.071078950484
H17 H 0.713076160503 0.926509358220 0.911943020584
H18 H 0.286923839497 0.426509358217 0.088056979416
H19 H 0.671301203831 0.865669033012 0.852015959889
H20 H 0.328698796169 0.365669033009 0.147984040111
H21 H 0.784037698360 0.805288522767 0.819140325665
H22 H 0.215962301640 0.305288522763 0.180859674335
H23 H 0.777795542066 0.932292256499 0.785811837683
H24 H 0.222204457934 0.432292256495 0.214188162317
H25 H 0.654221506256 0.962237116478 0.807225076171
H26 H 0.345778493744 0.462237116475 0.192774923829
H27 H 0.737898780399 0.819007276608 0.760055851545
H28 H 0.262101219601 0.319007276605 0.239944148454
H29 H 0.673017587693 0.884063090905 0.756395784897
H30 H 0.326982412308 0.384063090902 0.243604215103
H31 H 0.671807305139 0.812280831363 0.788977859982
H32 H 0.328192694861 0.312280831360 0.211022140018
H33 H 0.876682299132 0.844206871697 0.813552363440
H34 H 0.123317700868 0.344206871693 0.186447636560
H35 H 0.927314335668 0.974885558677 0.853980752932
H36 H 0.072685664332 0.474885558673 0.146019247068
H37 H 0.989401259770 0.814684279278 0.851847011719
H38 H 0.010598740230 0.314684279275 0.148152988281
H39 H 0.026619745531 0.899372218440 0.867375400778

```

|      |   |                |                |                |
|------|---|----------------|----------------|----------------|
| H40  | H | 0.973380254469 | 0.399372218437 | 0.132624599222 |
| H41  | H | 0.007452363282 | 0.035558441926 | 0.823774920614 |
| H42  | H | 0.992547636718 | 0.535558441922 | 0.176225079386 |
| H43  | H | 0.019366716855 | 0.975706927239 | 0.751827531312 |
| H44  | H | 0.980633283145 | 0.475706927236 | 0.248172468688 |
| H45  | H | 0.997479122189 | 0.135930512453 | 0.782101554417 |
| H46  | H | 0.002520877811 | 0.635930512450 | 0.217898445583 |
| H47  | H | 0.025273456562 | 0.125997580393 | 0.738712544474 |
| H48  | H | 0.974726543438 | 0.625997580390 | 0.261287455526 |
| H49  | H | 0.227119751686 | 0.980854393039 | 0.760189445086 |
| H50  | H | 0.772880248314 | 0.480854393036 | 0.239810554914 |
| H51  | H | 0.262363667666 | 0.993067202489 | 0.690944857612 |
| H52  | H | 0.737636332334 | 0.493067202485 | 0.309055142387 |
| H53  | H | 0.225200445481 | 0.909345142061 | 0.708130820340 |
| H54  | H | 0.774799554519 | 0.409345142058 | 0.291869179660 |
| H55  | H | 0.159925333904 | 0.045489347242 | 0.671888846902 |
| H56  | H | 0.840074666096 | 0.545489347239 | 0.328111153098 |
| H57  | H | 0.153397050046 | 0.948020202604 | 0.660215636080 |
| H58  | H | 0.846602949954 | 0.448020202601 | 0.339784363920 |
| H59  | H | 0.063354961711 | 0.012470937854 | 0.701743181579 |
| H60  | H | 0.936645038289 | 0.512470937850 | 0.298256818421 |
| H61  | H | 0.092403389713 | 0.918853461722 | 0.712312721398 |
| H62  | H | 0.907596610287 | 0.418853461719 | 0.287687278602 |
| H63  | H | 0.147152186018 | 0.145731411393 | 0.732623384722 |
| H64  | H | 0.852847813982 | 0.645731411390 | 0.267376615278 |
| H65  | H | 0.250390512465 | 0.234585206295 | 0.758776722702 |
| H66  | H | 0.749609487535 | 0.734585206292 | 0.241223277298 |
| H67  | H | 0.278653732321 | 0.310705182286 | 0.708464120043 |
| H68  | H | 0.721346267679 | 0.810705182282 | 0.291535879957 |
| H69  | H | 0.290072928724 | 0.212656575976 | 0.696913552993 |
| H70  | H | 0.709927071276 | 0.712656575972 | 0.303086447007 |
| H71  | H | 0.229856868771 | 0.297134141488 | 0.658507717217 |
| H72  | H | 0.770143131229 | 0.797134141485 | 0.341492282783 |
| H73  | H | 0.220382211953 | 0.366280478295 | 0.760031222268 |
| H74  | H | 0.779617788047 | 0.866280478292 | 0.239968777732 |
| H75  | H | 0.091333991576 | 0.389778689521 | 0.773806082553 |
| H76  | H | 0.908666008424 | 0.889778689518 | 0.226193917447 |
| H77  | H | 0.201103119755 | 0.501650785149 | 0.760152130968 |
| H78  | H | 0.798896880245 | 0.001650785146 | 0.239847869032 |
| H79  | H | 0.132260920609 | 0.442970217967 | 0.825467909282 |
| H80  | H | 0.867739079391 | 0.942970217963 | 0.174532090718 |
| H81  | H | 0.208381480244 | 0.414836030112 | 0.811700059937 |
| H82  | H | 0.791618519756 | 0.914836030109 | 0.188299940063 |
| H83  | H | 0.104524903700 | 0.572409361716 | 0.746164180098 |
| H84  | H | 0.895475096300 | 0.072409361713 | 0.253835819902 |
| H85  | H | 0.130732648099 | 0.602827836650 | 0.787331626735 |
| H86  | H | 0.869267351901 | 0.102827836646 | 0.212668373265 |
| H87  | H | 0.065107061205 | 0.538380451943 | 0.783973014006 |
| H88  | H | 0.934892938795 | 0.038380451940 | 0.216026985994 |
| H89  | H | 0.250012810847 | 0.550672499188 | 0.823292355731 |
| H90  | H | 0.749987189154 | 0.050672499185 | 0.176707644269 |
| H91  | H | 0.217039354011 | 0.505327404046 | 0.860133551995 |
| H92  | H | 0.782960645989 | 0.005327404043 | 0.139866448005 |
| H93  | H | 0.173196668334 | 0.577040602798 | 0.838242577252 |
| H94  | H | 0.826803331666 | 0.077040602794 | 0.161757422748 |
| H95  | H | 0.172420441512 | 0.426790338609 | 0.693538756971 |
| H96  | H | 0.827579558488 | 0.926790338606 | 0.306461243029 |
| H97  | H | 0.055803579021 | 0.497669229171 | 0.665486017275 |
| H98  | H | 0.944196420979 | 0.997669229168 | 0.334513982725 |
| H99  | H | 0.182697258330 | 0.452660832467 | 0.632570878558 |
| H100 | H | 0.817302741671 | 0.952660832464 | 0.367429121442 |
| H101 | H | 0.104163449761 | 0.423402585249 | 0.587439632723 |
| H102 | H | 0.895836550239 | 0.923402585245 | 0.412560367277 |

|      |   |                |                |                |
|------|---|----------------|----------------|----------------|
| H103 | H | 0.140638780199 | 0.512600437362 | 0.576963966090 |
| H104 | H | 0.859361219801 | 0.012600437359 | 0.423036033910 |
| H105 | H | 0.062644732347 | 0.510227448076 | 0.594822082703 |
| H106 | H | 0.937355267653 | 0.010227448072 | 0.405177917297 |
| H107 | H | 0.191543650423 | 0.594947921766 | 0.623596426576 |
| H108 | H | 0.808456349577 | 0.094947921763 | 0.376403573423 |
| H109 | H | 0.178069110771 | 0.573484287874 | 0.668287627242 |
| H110 | H | 0.821930889229 | 0.073484287870 | 0.331712372758 |
| H111 | H | 0.114945158135 | 0.609132284720 | 0.642257965030 |
| H112 | H | 0.885054841865 | 0.109132284717 | 0.357742034970 |
| H113 | H | 0.125174424110 | 0.305991167845 | 0.667633687597 |
| H114 | H | 0.874825575891 | 0.805991167842 | 0.332366312403 |
| H115 | H | 0.030903432326 | 0.244736039723 | 0.621186744036 |
| H116 | H | 0.969096567674 | 0.744736039719 | 0.378813255964 |
| H117 | H | 0.119422216164 | 0.164909971009 | 0.641535389225 |
| H118 | H | 0.880577783836 | 0.664909971006 | 0.358464610774 |
| H119 | H | 0.046058826510 | 0.121357120856 | 0.653166555703 |
| H120 | H | 0.953941173490 | 0.621357120853 | 0.346833444297 |
| H121 | H | 0.091944772063 | 0.170509468476 | 0.685249923936 |
| H122 | H | 0.908055227937 | 0.670509468472 | 0.314750076064 |
| H123 | H | 0.023692944137 | 0.289348644076 | 0.712622862684 |
| H124 | H | 0.976307055863 | 0.789348644073 | 0.287377137316 |
| H125 | H | 0.893211960804 | 0.239683540478 | 0.719020461573 |
| H126 | H | 0.106788039196 | 0.739683540475 | 0.280979538427 |
| H127 | H | 0.963899380691 | 0.260877233203 | 0.769745507524 |
| H128 | H | 0.036100619309 | 0.760877233200 | 0.230254492476 |
| H129 | H | 0.966374106096 | 0.360512514649 | 0.760696662762 |
| H130 | H | 0.033625893904 | 0.860512514645 | 0.239303337238 |
| H131 | H | 0.889690098968 | 0.344687057343 | 0.806511383447 |
| H132 | H | 0.110309901032 | 0.844687057340 | 0.193488616553 |
| H133 | H | 0.847589207723 | 0.368149567019 | 0.769015323359 |
| H134 | H | 0.152410792277 | 0.868149567015 | 0.230984676641 |
| H135 | H | 0.784107676478 | 0.274081350096 | 0.794338437348 |
| H136 | H | 0.215892323522 | 0.774081350093 | 0.205661562651 |
| H137 | H | 0.824223388556 | 0.222314823815 | 0.761547274469 |
| H138 | H | 0.175776611445 | 0.722314823811 | 0.238452725531 |
| H139 | H | 0.895591025170 | 0.218146776067 | 0.827047797167 |
| H140 | H | 0.104408974830 | 0.718146776064 | 0.172952202833 |
| H141 | H | 0.756379572214 | 0.138198254347 | 0.787803504591 |
| H142 | H | 0.243620427786 | 0.638198254343 | 0.212196495409 |
| H143 | H | 0.749196218990 | 0.064056315557 | 0.817147464323 |
| H144 | H | 0.250803781010 | 0.564056315554 | 0.182852535676 |
| H145 | H | 0.897813261864 | 0.109123819253 | 0.856143562278 |
| H146 | H | 0.102186738136 | 0.609123819249 | 0.143856437722 |
| H147 | H | 0.830339907935 | 0.050498538679 | 0.860130809014 |
| H148 | H | 0.169660092065 | 0.550498538675 | 0.139869190986 |
| H149 | H | 0.954810921853 | 0.431384814413 | 0.697761301870 |
| H150 | H | 0.045189078147 | 0.931384814409 | 0.302238698130 |
| H151 | H | 0.834042504403 | 0.501307395242 | 0.689614982396 |
| H152 | H | 0.165957495597 | 0.001307395239 | 0.310385017604 |
| H153 | H | 0.947515215526 | 0.517741149688 | 0.639556148517 |
| H154 | H | 0.052484784474 | 0.017741149684 | 0.360443851483 |
| H155 | H | 0.881122828810 | 0.580834483583 | 0.643798884235 |
| H156 | H | 0.118877171190 | 0.080834483580 | 0.356201115764 |
| H157 | H | 0.951897250758 | 0.633838060959 | 0.679211446136 |
| H158 | H | 0.048102749242 | 0.133838060956 | 0.320788553864 |
| H159 | H | 0.918994404562 | 0.390690595287 | 0.626554086753 |
| H160 | H | 0.081005595438 | 0.890690595284 | 0.373445913247 |
| H161 | H | 0.823374968718 | 0.408404720217 | 0.574426467183 |
| H162 | H | 0.176625031282 | 0.908404720214 | 0.425573532817 |
| H163 | H | 0.931532680371 | 0.289871653959 | 0.582078515213 |
| H164 | H | 0.068467319629 | 0.789871653955 | 0.417921484786 |
| H165 | H | 0.887176070637 | 0.304667032293 | 0.543812149247 |

|      |   |                |                |                |
|------|---|----------------|----------------|----------------|
| H166 | H | 0.112823929363 | 0.804667032289 | 0.456187850753 |
| H167 | H | 0.009205384875 | 0.327335424546 | 0.526288338213 |
| H168 | H | 0.990794615125 | 0.827335424543 | 0.473711661787 |
| H169 | H | 0.028823239962 | 0.424469738552 | 0.527935641126 |
| H170 | H | 0.971176760038 | 0.924469738549 | 0.472064358874 |
| H171 | H | 0.853319668200 | 0.262514464115 | 0.636234035306 |
| H172 | H | 0.146680331800 | 0.762514464112 | 0.363765964694 |
| H173 | H | 0.754235852973 | 0.155740124899 | 0.619257647801 |
| H174 | H | 0.245764147027 | 0.655740124896 | 0.380742352199 |
| H175 | H | 0.839303716742 | 0.125118638563 | 0.659751886373 |
| H176 | H | 0.160696283258 | 0.625118638560 | 0.340248113626 |
| H177 | H | 0.822938014508 | 0.207955358405 | 0.684675708807 |
| H178 | H | 0.177061985492 | 0.707955358402 | 0.315324291193 |
| H179 | H | 0.725598322178 | 0.214587222078 | 0.723340359041 |
| H180 | H | 0.274401677822 | 0.714587222075 | 0.276659640959 |
| H181 | H | 0.781756496304 | 0.007589499088 | 0.669634861993 |
| H182 | H | 0.218243503696 | 0.507589499084 | 0.330365138007 |
| H183 | H | 0.654008785195 | 0.138615020539 | 0.760952076937 |
| H184 | H | 0.345991214805 | 0.638615020535 | 0.239047923063 |
| H185 | H | 0.709360788195 | 0.930760755967 | 0.707453709023 |
| H186 | H | 0.290639211805 | 0.430760755964 | 0.292546290977 |
| H187 | H | 0.645042206972 | 0.997360922450 | 0.753354491205 |
| H188 | H | 0.354957793028 | 0.497360922446 | 0.246645508795 |
| H189 | H | 0.754111381818 | 0.324276541397 | 0.673413152833 |
| H190 | H | 0.245888618182 | 0.824276541394 | 0.326586847166 |
| H191 | H | 0.625079887691 | 0.306669145418 | 0.695520701385 |
| H192 | H | 0.374920112309 | 0.806669145415 | 0.304479298614 |
| H193 | H | 0.706421118992 | 0.452448653786 | 0.686999144362 |
| H194 | H | 0.293578881008 | 0.952448653782 | 0.313000855637 |
| H195 | H | 0.631985640108 | 0.447023581105 | 0.708984797948 |
| H196 | H | 0.368014359892 | 0.947023581102 | 0.291015202052 |
| H197 | H | 0.757242606889 | 0.492179351419 | 0.734789580988 |
| H198 | H | 0.242757393111 | 0.992179351415 | 0.265210419011 |
| H199 | H | 0.767655172401 | 0.440009533064 | 0.772502401551 |
| H200 | H | 0.232344827599 | 0.940009533060 | 0.227497598448 |
| H201 | H | 0.689966213570 | 0.402895835563 | 0.620988293766 |
| H202 | H | 0.310033786430 | 0.902895835560 | 0.379011706234 |
| H203 | H | 0.567529210028 | 0.460351574962 | 0.597161686743 |
| H204 | H | 0.432470789972 | 0.960351574958 | 0.402838313256 |
| H205 | H | 0.693568706287 | 0.422800039752 | 0.561637753045 |
| H206 | H | 0.306431293713 | 0.922800039749 | 0.438362246955 |
| H207 | H | 0.646832550591 | 0.486764366993 | 0.507652923770 |
| H208 | H | 0.353167449409 | 0.986764366989 | 0.492347076230 |
| H209 | H | 0.570487012537 | 0.477689239277 | 0.526585312900 |
| H210 | H | 0.429512987463 | 0.977689239273 | 0.473414687100 |
| H211 | H | 0.615677738562 | 0.393987930453 | 0.516993160375 |
| H212 | H | 0.384322261439 | 0.893987930450 | 0.483006839624 |
| H213 | H | 0.692546455193 | 0.569750271850 | 0.554122764690 |
| H214 | H | 0.307453544807 | 0.069750271846 | 0.445877235310 |
| H215 | H | 0.690442956252 | 0.541490531661 | 0.597992079903 |
| H216 | H | 0.309557043748 | 0.041490531657 | 0.402007920097 |
| H217 | H | 0.619387920795 | 0.571560547056 | 0.577060406387 |
| H218 | H | 0.380612079205 | 0.071560547053 | 0.422939593612 |
| H219 | H | 0.650706692105 | 0.282314858861 | 0.582269344542 |
| H220 | H | 0.349293307895 | 0.782314858857 | 0.417730655458 |
| H221 | H | 0.551048575817 | 0.215138540030 | 0.541202917003 |
| H222 | H | 0.448951424183 | 0.715138540027 | 0.458797082997 |
| H223 | H | 0.656335765881 | 0.158631870002 | 0.543802605932 |
| H224 | H | 0.343664234119 | 0.658631869998 | 0.456197394068 |
| H225 | H | 0.652657884974 | 0.150203088987 | 0.589772616683 |
| H226 | H | 0.347342115026 | 0.650203088983 | 0.410227383317 |
| H227 | H | 0.566690679527 | 0.214517579829 | 0.634777566117 |
| H228 | H | 0.433309320473 | 0.714517579825 | 0.365222433883 |

|      |   |                |                |                |
|------|---|----------------|----------------|----------------|
| H229 | H | 0.451029637069 | 0.125411308853 | 0.641979867974 |
| H230 | H | 0.548970362931 | 0.625411308850 | 0.358020132026 |
| H231 | H | 0.506494087572 | 0.242580576794 | 0.693236806439 |
| H232 | H | 0.493505912428 | 0.742580576791 | 0.306763193561 |
| H233 | H | 0.447579327725 | 0.173071090630 | 0.702835040372 |
| H234 | H | 0.552420672275 | 0.673071090627 | 0.297164959628 |
| H235 | H | 0.583970553920 | 0.132816652057 | 0.678990280944 |
| H236 | H | 0.416029446080 | 0.632816652054 | 0.321009719056 |
| H237 | H | 0.562773750728 | 0.146246375135 | 0.722373370999 |
| H238 | H | 0.437226249272 | 0.646246375132 | 0.277626629001 |
| H239 | H | 0.494510482811 | 0.022405940312 | 0.680072040544 |
| H240 | H | 0.505489517189 | 0.522405940309 | 0.319927959456 |
| H241 | H | 0.571319259494 | 0.008047852375 | 0.696308688571 |
| H242 | H | 0.428680740506 | 0.508047852372 | 0.303691311428 |
| H243 | H | 0.535663904166 | 0.000813633897 | 0.753327437867 |
| H244 | H | 0.464336095835 | 0.500813633893 | 0.246672562133 |
| H245 | H | 0.402829783518 | 0.019325511888 | 0.696442319154 |
| H246 | H | 0.597170216482 | 0.519325511885 | 0.303557680846 |
| H247 | H | 0.351512244426 | 0.041516643797 | 0.731427523717 |
| H248 | H | 0.648487755574 | 0.541516643794 | 0.268572476283 |
| H249 | H | 0.464878672375 | 0.012705545566 | 0.796597530100 |
| H250 | H | 0.535121327625 | 0.512705545562 | 0.203402469900 |
| H251 | H | 0.384653729660 | 0.994253583287 | 0.787342737086 |
| H252 | H | 0.615346270340 | 0.494253583284 | 0.212657262914 |
| H253 | H | 0.474508366571 | 0.327350559847 | 0.634018951030 |
| H254 | H | 0.525491633429 | 0.827350559843 | 0.365981048970 |
| H255 | H | 0.369619805396 | 0.387040343567 | 0.662675450879 |
| H256 | H | 0.630380194604 | 0.887040343564 | 0.337324549121 |
| H257 | H | 0.455230371642 | 0.434646790014 | 0.607698905629 |
| H258 | H | 0.544769628358 | 0.934646790010 | 0.392301094371 |
| H259 | H | 0.378984793966 | 0.455869615765 | 0.592861662842 |
| H260 | H | 0.621015206034 | 0.955869615762 | 0.407138337157 |
| H261 | H | 0.436694160365 | 0.512021692036 | 0.660685967799 |
| H262 | H | 0.563305839635 | 0.012021692033 | 0.339314032201 |
| H263 | H | 0.476861834945 | 0.571507728548 | 0.604084183725 |
| H264 | H | 0.523138165056 | 0.071507728545 | 0.395915816275 |
| H265 | H | 0.437915909607 | 0.639691617064 | 0.631226566104 |
| H266 | H | 0.562084090393 | 0.139691617060 | 0.368773433896 |
| H267 | H | 0.398103086433 | 0.600758927392 | 0.594778504610 |
| H268 | H | 0.601896913567 | 0.100758927388 | 0.405221495390 |
| H269 | H | 0.339265988767 | 0.592716619867 | 0.668517725214 |
| H270 | H | 0.660734011233 | 0.092716619864 | 0.331482274786 |
| H271 | H | 0.317591699946 | 0.494386897207 | 0.668350974035 |
| H272 | H | 0.682408300054 | 0.994386897203 | 0.331649025965 |
| H273 | H | 0.304790612688 | 0.550512046170 | 0.630887504918 |
| H274 | H | 0.695209387312 | 0.050512046167 | 0.369112495082 |
| H275 | H | 0.216982633862 | 0.357280646586 | 0.578314163426 |
| H276 | H | 0.783017366138 | 0.857280646582 | 0.421685836573 |
| H277 | H | 0.228619328549 | 0.267344661382 | 0.520138382835 |
| H278 | H | 0.771380671451 | 0.767344661378 | 0.479861617165 |
| H279 | H | 0.267707958702 | 0.357661587877 | 0.522127646730 |
| H280 | H | 0.732292041298 | 0.857661587873 | 0.477872353269 |
| H281 | H | 0.327937236504 | 0.201313813361 | 0.539192886785 |
| H282 | H | 0.672062763496 | 0.701313813358 | 0.460807113214 |
| H283 | H | 0.354844607179 | 0.270917848120 | 0.508668932493 |
| H284 | H | 0.645155392821 | 0.770917848117 | 0.491331067507 |
| H285 | H | 0.401788313999 | 0.271065990641 | 0.575201762653 |
| H286 | H | 0.598211686001 | 0.771065990638 | 0.424798237346 |
| H287 | H | 0.386172250095 | 0.359535145817 | 0.554191508634 |
| H288 | H | 0.613827749905 | 0.859535145813 | 0.445808491366 |
| H289 | H | 0.291546732708 | 0.205272453633 | 0.616083801839 |
| H290 | H | 0.708453267292 | 0.705272453629 | 0.383916198161 |
| H291 | H | 0.216719421965 | 0.121626067824 | 0.646592485724 |



|      |   |                |                |                |
|------|---|----------------|----------------|----------------|
| H292 | H | 0.783280578035 | 0.621626067821 | 0.353407514276 |
| H293 | H | 0.177749095842 | 0.104920925537 | 0.606535622996 |
| H294 | H | 0.822250904158 | 0.604920925533 | 0.393464377004 |
| H295 | H | 0.336333195248 | 0.103650422716 | 0.588028238448 |
| H296 | H | 0.663666804752 | 0.603650422713 | 0.411971761552 |
| H297 | H | 0.332651781228 | 0.942345742172 | 0.577220006402 |
| H298 | H | 0.667348218772 | 0.442345742169 | 0.422779993598 |
| H299 | H | 0.452959896653 | 0.035849669008 | 0.587448441270 |
| H300 | H | 0.547040103347 | 0.535849669004 | 0.412551558730 |
| H301 | H | 0.426340519817 | 0.105589538688 | 0.548289943764 |
| H302 | H | 0.573659480183 | 0.605589538685 | 0.451710056236 |
| H303 | H | 0.466311151328 | 0.897684660328 | 0.577453303353 |
| H304 | H | 0.533688848672 | 0.397684660325 | 0.422546696646 |
| H305 | H | 0.492738152669 | 0.948269361141 | 0.539858079402 |
| H306 | H | 0.507261847331 | 0.448269361138 | 0.460141920598 |
| H307 | H | 0.417773004075 | 0.900752669432 | 0.539688983338 |
| H308 | H | 0.582226995925 | 0.400752669429 | 0.460311016662 |
| H309 | H | 0.370569044263 | 0.884438334640 | 0.688616816098 |
| H310 | H | 0.629430955738 | 0.384438334637 | 0.311383183902 |
| H311 | H | 0.392507508647 | 0.723142381681 | 0.659664403036 |
| H312 | H | 0.607492491353 | 0.223142381677 | 0.340335596964 |
| H313 | H | 0.344838645785 | 0.749918207854 | 0.695892824843 |
| H314 | H | 0.655161354215 | 0.249918207851 | 0.304107175157 |
| H315 | H | 0.286961427393 | 0.715782048113 | 0.634969557259 |
| H316 | H | 0.713038572607 | 0.215782048110 | 0.365030442741 |
| H317 | H | 0.261141669870 | 0.799785304403 | 0.657864561948 |
| H318 | H | 0.738858330130 | 0.299785304400 | 0.342135438052 |
| H319 | H | 0.352870840809 | 0.792909948404 | 0.595766304371 |
| H320 | H | 0.647129159191 | 0.292909948401 | 0.404233695629 |
| H321 | H | 0.288240343389 | 0.858165041623 | 0.603603930992 |
| H322 | H | 0.711759656611 | 0.358165041619 | 0.396396069008 |
| H323 | H | 0.446936676864 | 0.847334896733 | 0.722961381641 |
| H324 | H | 0.553063323137 | 0.347334896729 | 0.277038618359 |
| H325 | H | 0.568250850817 | 0.883114517139 | 0.719626082982 |
| H326 | H | 0.431749149183 | 0.383114517135 | 0.280373917018 |
| H327 | H | 0.515625215454 | 0.732408904278 | 0.749607515616 |
| H328 | H | 0.484374784546 | 0.232408904275 | 0.250392484384 |
| H329 | H | 0.591546667402 | 0.768112657230 | 0.759485860689 |
| H330 | H | 0.408453332598 | 0.268112657227 | 0.240514139311 |
| H331 | H | 0.474313449549 | 0.868535718664 | 0.774502279857 |
| H332 | H | 0.525686550451 | 0.368535718661 | 0.225497720143 |
| H333 | H | 0.493756881282 | 0.790030153925 | 0.801645105697 |
| H334 | H | 0.506243118718 | 0.290030153921 | 0.198354894303 |
| H335 | H | 0.525665637060 | 0.690126435242 | 0.689804797377 |
| H336 | H | 0.474334362940 | 0.190126435239 | 0.310195202623 |
| H337 | H | 0.657555791096 | 0.655971712518 | 0.678808114843 |
| H338 | H | 0.342444208904 | 0.155971712515 | 0.321191885157 |
| H339 | H | 0.572864891833 | 0.552459453886 | 0.686934998444 |
| H340 | H | 0.427135108167 | 0.052459453882 | 0.313065001556 |
| H341 | H | 0.620766288282 | 0.538013402480 | 0.649388238060 |
| H342 | H | 0.379233711718 | 0.038013402476 | 0.350611761940 |
| H343 | H | 0.542705900821 | 0.575148802615 | 0.645141333201 |
| H344 | H | 0.457294099179 | 0.075148802612 | 0.354858666799 |
| H345 | H | 0.542642373571 | 0.728601668040 | 0.619244866901 |
| H346 | H | 0.457357626429 | 0.228601668037 | 0.380755133099 |
| H347 | H | 0.624748495275 | 0.699175375848 | 0.558367640391 |
| H348 | H | 0.375251504725 | 0.199175375845 | 0.441632359609 |
| H349 | H | 0.508661286699 | 0.800830654327 | 0.572945157893 |
| H350 | H | 0.491338713302 | 0.300830654323 | 0.427054842107 |
| H351 | H | 0.548054389731 | 0.802479402190 | 0.532521380159 |
| H352 | H | 0.451945610269 | 0.302479402186 | 0.467478619841 |
| H353 | H | 0.489657942082 | 0.657269987207 | 0.564618731054 |
| H354 | H | 0.510342057919 | 0.157269987203 | 0.435381268946 |

|      |   |                |                |                |
|------|---|----------------|----------------|----------------|
| H355 | H | 0.403912959467 | 0.752554913411 | 0.553495987965 |
| H356 | H | 0.596087040534 | 0.252554913408 | 0.446504012035 |
| H357 | H | 0.399386359923 | 0.676165954751 | 0.523150378403 |
| H358 | H | 0.600613640077 | 0.176165954747 | 0.476849621597 |
| H359 | H | 0.432058273096 | 0.766622069179 | 0.510544413641 |
| H360 | H | 0.567941726904 | 0.266622069176 | 0.489455586358 |
| H361 | H | 0.499039195318 | 0.603380933551 | 0.504406070925 |
| H362 | H | 0.500960804682 | 0.103380933548 | 0.495593929075 |
| H363 | H | 0.574401097157 | 0.628001074138 | 0.520820453507 |
| H364 | H | 0.425598902843 | 0.128001074135 | 0.479179546493 |
| H365 | H | 0.536760595589 | 0.689516859859 | 0.490517175637 |
| H366 | H | 0.463239404411 | 0.189516859856 | 0.509482824363 |
| H367 | H | 0.601485906625 | 0.850427376642 | 0.619394132198 |
| H368 | H | 0.398514093375 | 0.350427376638 | 0.380605867802 |
| H369 | H | 0.688252042503 | 0.948892899529 | 0.580508429915 |
| H370 | H | 0.311747957497 | 0.448892899525 | 0.419491570085 |
| H371 | H | 0.634930354506 | 0.963677599734 | 0.654454291533 |
| H372 | H | 0.365069645494 | 0.463677599731 | 0.345545708467 |
| H373 | H | 0.678254351218 | 0.036048005995 | 0.632008651158 |
| H374 | H | 0.321745648782 | 0.536048005992 | 0.367991348842 |
| H375 | H | 0.710846249446 | 0.804243471993 | 0.640292016279 |
| H376 | H | 0.289153750554 | 0.304243471990 | 0.359707983721 |
| H377 | H | 0.842163172011 | 0.839437654197 | 0.656275572625 |
| H378 | H | 0.157836827989 | 0.339437654193 | 0.343724427375 |
| H379 | H | 0.779339108041 | 0.747041257048 | 0.691858915730 |
| H380 | H | 0.220660891959 | 0.247041257045 | 0.308141084270 |
| H381 | H | 0.846599763012 | 0.700630554402 | 0.672664459426 |
| H382 | H | 0.153400236988 | 0.200630554399 | 0.327335540574 |
| H383 | H | 0.769148556224 | 0.685593843906 | 0.655081247891 |
| H384 | H | 0.230851443776 | 0.185593843903 | 0.344918752108 |
| H385 | H | 0.775761328229 | 0.712944587543 | 0.589471772729 |
| H386 | H | 0.224238671771 | 0.212944587539 | 0.410528227271 |
| H387 | H | 0.904028857344 | 0.694810132940 | 0.560334366699 |
| H388 | H | 0.095971142656 | 0.194810132937 | 0.439665633300 |
| H389 | H | 0.850018974823 | 0.648428207063 | 0.508024082590 |
| H390 | H | 0.149981025177 | 0.148428207060 | 0.491975917410 |
| H391 | H | 0.739766280451 | 0.640173021868 | 0.511158894275 |
| H392 | H | 0.260233719549 | 0.140173021865 | 0.488841105725 |
| H393 | H | 0.876019643694 | 0.552316654676 | 0.553319710579 |
| H394 | H | 0.123980356306 | 0.052316654673 | 0.446680289421 |
| H395 | H | 0.801930224909 | 0.528995861136 | 0.534469694265 |
| H396 | H | 0.198069775091 | 0.028995861133 | 0.465530305735 |
| H397 | H | 0.803968884943 | 0.572468111043 | 0.576197753843 |
| H398 | H | 0.196031115057 | 0.072468111040 | 0.423802246157 |
| H399 | H | 0.781398646902 | 0.833791908700 | 0.545879567127 |
| H400 | H | 0.218601353098 | 0.333791908697 | 0.454120432873 |
| H401 | H | 0.834175752263 | 0.904493598807 | 0.487554514534 |
| H402 | H | 0.165824247737 | 0.404493598803 | 0.512445485466 |
| H403 | H | 0.731691623562 | 0.933657938697 | 0.521765767534 |
| H404 | H | 0.268308376438 | 0.433657938693 | 0.478234232466 |
| H405 | H | 0.777450295445 | 0.984553907553 | 0.551959700475 |
| H406 | H | 0.222549704556 | 0.484553907550 | 0.448040299525 |
| H407 | H | 0.752256099154 | 0.982211418466 | 0.454142542537 |
| H408 | H | 0.247743900846 | 0.482211418463 | 0.545857457463 |
| H409 | H | 0.777011204366 | 0.119693217808 | 0.546002634135 |
| H410 | H | 0.222988795634 | 0.619693217805 | 0.453997365865 |
| H411 | H | 0.738872463698 | 0.100627748576 | 0.419708543514 |
| H412 | H | 0.261127536302 | 0.600627748573 | 0.580291456486 |
| H413 | H | 0.763993622193 | 0.238283026341 | 0.511631415691 |
| H414 | H | 0.236006377807 | 0.738283026337 | 0.488368584309 |
| H415 | H | 0.756857508358 | 0.233556959866 | 0.420620459252 |
| H416 | H | 0.243142491642 | 0.733556959863 | 0.579379540747 |
| H417 | H | 0.894213877786 | 0.914338331793 | 0.572121894610 |

|      |   |                 |                |                |
|------|---|-----------------|----------------|----------------|
| H418 | H | 0.105786122214  | 0.414338331789 | 0.427878105389 |
| H419 | H | 0.987229691591  | 0.033282174193 | 0.548418547657 |
| H420 | H | 0.012770308409  | 0.533282174189 | 0.451581452343 |
| H421 | H | 0.979436568506  | 0.080394295641 | 0.610406995221 |
| H422 | H | 0.020563431494  | 0.580394295638 | 0.389593004779 |
| H423 | H | 0.870808432487  | 0.984121865889 | 0.619242106078 |
| H424 | H | 0.129191567513  | 0.484121865885 | 0.380757893922 |
| H425 | H | 0.908322825874  | 0.135512310712 | 0.561552034570 |
| H426 | H | 0.091677174126  | 0.635512310709 | 0.438447965430 |
| H427 | H | 0.881016585546  | 0.149478051409 | 0.604861362012 |
| H428 | H | 0.118983414454  | 0.649478051405 | 0.395138637988 |
| H429 | H | 0.846554262849  | 0.076319037813 | 0.578455965771 |
| H430 | H | 0.153445737151  | 0.576319037810 | 0.421544034229 |
| H431 | H | 0.981614778581  | 0.850513928402 | 0.583247357622 |
| H432 | H | 0.018385221419  | 0.350513928398 | 0.416752642378 |
| H433 | H | 0.065571520647  | 0.777780921987 | 0.607296788423 |
| H434 | H | 0.934428479353  | 0.277780921984 | 0.392703211577 |
| H435 | H | 0.112739844708  | 0.862665547030 | 0.610624283032 |
| H436 | H | 0.887260155292  | 0.362665547027 | 0.389375716968 |
| H437 | H | 0.965267555627  | 0.902784367350 | 0.642020458822 |
| H438 | H | 0.034732444373  | 0.402784367347 | 0.357979541178 |
| H439 | H | 0.001048548262  | 0.882749002365 | 0.715227136771 |
| H440 | H | 0.998951451738  | 0.382749002362 | 0.284772863229 |
| H441 | H | 0.871507645049  | 0.921660950112 | 0.683085823943 |
| H442 | H | 0.128492354951  | 0.421660950108 | 0.316914176057 |
| H443 | H | 0.890377051626  | 0.923911591023 | 0.727730760129 |
| H444 | H | 0.109622948374  | 0.423911591020 | 0.272269239870 |
| H445 | H | 0.920487308933  | 0.815958459022 | 0.750369857799 |
| H446 | H | 0.079512691067  | 0.315958459018 | 0.249630142201 |
| H447 | H | 0.906054895620  | 0.656146770550 | 0.723516441315 |
| H448 | H | 0.093945104380  | 0.156146770547 | 0.276483558685 |
| H449 | H | 0.967561062594  | 0.606073508170 | 0.766348359182 |
| H450 | H | 0.032438937406  | 0.106073508167 | 0.233651640818 |
| H451 | H | 0.948654517554  | 0.752034186644 | 0.809890648140 |
| H452 | H | 0.051345482446  | 0.252034186641 | 0.190109351860 |
| H453 | H | 0.912473913364  | 0.662313148782 | 0.817709924287 |
| H454 | H | 0.087526086636  | 0.162313148779 | 0.182290075713 |
| H455 | H | 0.068497192214  | 0.681963804041 | 0.768533190157 |
| H456 | H | 0.931502807786  | 0.181963804037 | 0.231466809843 |
| H457 | H | 0.027780680420  | 0.766262908281 | 0.757472738889 |
| H458 | H | 0.972219319580  | 0.266262908278 | 0.242527261111 |
| H459 | H | 0.034708908648  | 0.690037878405 | 0.726935683176 |
| H460 | H | 0.965291091352  | 0.190037878402 | 0.273064316824 |
| H461 | H | 0.021429849088  | 0.604100209385 | 0.829566206002 |
| H462 | H | 0.978570150912  | 0.104100209382 | 0.170433793998 |
| H463 | H | 0.998721255384  | 0.677968772071 | 0.858811865653 |
| H464 | H | 0.001278744616  | 0.177968772067 | 0.141188134347 |
| H465 | H | 0.055138123675  | 0.697245098492 | 0.825471723048 |
| H466 | H | 0.944861876325  | 0.197245098489 | 0.174528276951 |
| H467 | H | 0.842316028925  | 0.577934155939 | 0.764834153591 |
| H468 | H | 0.157683971075  | 0.077934155935 | 0.235165846409 |
| H469 | H | 0.779259287034  | 0.673572461777 | 0.816266273751 |
| H470 | H | 0.220740712966  | 0.173572461773 | 0.183733726248 |
| H471 | H | 0.702811221599  | 0.534582980480 | 0.794310905322 |
| H472 | H | 0.297188778401  | 0.034582980477 | 0.205689094678 |
| H473 | H | 0.679603511663  | 0.693539197204 | 0.763275517739 |
| H474 | H | 0.320396488337  | 0.193539197201 | 0.236724482261 |
| H475 | H | 0.710637719191  | 0.614138401403 | 0.740721820407 |
| H476 | H | 0.2893662280809 | 0.114138401399 | 0.259278179593 |
| H477 | H | 0.686861073602  | 0.601618772681 | 0.852237133683 |
| H478 | H | 0.313138926398  | 0.101618772678 | 0.147762866317 |
| H479 | H | 0.617695720343  | 0.596613272180 | 0.826718608443 |
| H480 | H | 0.382304279657  | 0.096613272177 | 0.173281391556 |

|      |   |                |                |                |
|------|---|----------------|----------------|----------------|
| H481 | H | 0.659876438179 | 0.685050027457 | 0.829155563684 |
| H482 | H | 0.340123561822 | 0.185050027454 | 0.170844436316 |
| H483 | H | 0.611370312703 | 0.536807984241 | 0.754100572951 |
| H484 | H | 0.388629687297 | 0.036807984238 | 0.245899427049 |
| H485 | H | 0.593578065003 | 0.622902394037 | 0.731096675343 |
| H486 | H | 0.406421934997 | 0.122902394034 | 0.268903324657 |
| H487 | H | 0.577919912748 | 0.617241534111 | 0.775882265369 |
| H488 | H | 0.422080087252 | 0.117241534108 | 0.224117734631 |
| H489 | H | 0.795954838722 | 0.623384683294 | 0.867215624516 |
| H490 | H | 0.204045161278 | 0.123384683291 | 0.132784375484 |
| H491 | H | 0.829354203947 | 0.457599190378 | 0.869514029184 |
| H492 | H | 0.170645796053 | 0.957599190374 | 0.130485970816 |
| H493 | H | 0.877879836653 | 0.487690578384 | 0.929920714060 |
| H494 | H | 0.122120163347 | 0.987690578380 | 0.070079285940 |
| H495 | H | 0.892884512977 | 0.648454799693 | 0.898211307995 |
| H496 | H | 0.107115487024 | 0.148454799689 | 0.101788692005 |
| H497 | H | 0.836039263046 | 0.625569470180 | 0.930277723286 |
| H498 | H | 0.163960736954 | 0.125569470177 | 0.069722276714 |
| H499 | H | 0.985161839693 | 0.515070878689 | 0.900469648299 |
| H500 | H | 0.014838160307 | 0.015070878686 | 0.099530351701 |
| H501 | H | 0.943456595480 | 0.533239826927 | 0.861404080088 |
| H502 | H | 0.056543404520 | 0.033239826924 | 0.138595919912 |
| H503 | H | 0.941199587877 | 0.440042337969 | 0.880470822889 |
| H504 | H | 0.058800412123 | 0.940042337965 | 0.119529177110 |
| H505 | H | 0.920890181109 | 0.592149867910 | 0.972389643392 |
| H506 | H | 0.079109818891 | 0.092149867907 | 0.027610356608 |
| H507 | H | 0.934774169766 | 0.686172383865 | 0.954073058505 |
| H508 | H | 0.065225830234 | 0.186172383861 | 0.045926941495 |
| H509 | H | 0.981171898945 | 0.607978154110 | 0.940693083198 |
| H510 | H | 0.018828101055 | 0.107978154107 | 0.059306916802 |
| H511 | H | 0.651610916249 | 0.441220930428 | 0.926304988833 |
| H512 | H | 0.348389083751 | 0.941220930425 | 0.073695011167 |
| H513 | H | 0.669456049419 | 0.322597995403 | 0.974848958621 |
| H514 | H | 0.330543950581 | 0.822597995399 | 0.025151041379 |
| H515 | H | 0.660787127667 | 0.308189506220 | 0.929844860891 |
| H516 | H | 0.339212872333 | 0.808189506217 | 0.070155139109 |
| H517 | H | 0.786430744675 | 0.317333844336 | 0.969869454274 |
| H518 | H | 0.213569255325 | 0.817333844333 | 0.030130545725 |
| H519 | H | 0.764092569105 | 0.248576930687 | 0.938222330697 |
| H520 | H | 0.235907430896 | 0.748576930684 | 0.061777669303 |
| H521 | H | 0.839195085164 | 0.372108668247 | 0.921505318643 |
| H522 | H | 0.160804914836 | 0.872108668244 | 0.078494681357 |
| H523 | H | 0.780691344984 | 0.340165818829 | 0.891517022019 |
| H524 | H | 0.219308655017 | 0.840165818825 | 0.108482977981 |
| H525 | H | 0.781968585758 | 0.482624703979 | 0.980966575655 |
| H526 | H | 0.218031414242 | 0.982624703975 | 0.019033424345 |
| H527 | H | 0.692633547332 | 0.562672593580 | 0.027487216636 |
| H528 | H | 0.307366452668 | 0.062672593577 | 0.972512783364 |
| H529 | H | 0.773816124476 | 0.538480347418 | 0.035864131961 |
| H530 | H | 0.226183875524 | 0.038480347414 | 0.964135868039 |
| H531 | H | 0.818349469660 | 0.651601991983 | 0.047146829793 |
| H532 | H | 0.181650530340 | 0.151601991980 | 0.952853170207 |
| H533 | H | 0.817857046706 | 0.774088520642 | 0.994227199273 |
| H534 | H | 0.182142953295 | 0.274088520639 | 0.005772800727 |
| H535 | H | 0.719438982848 | 0.806419967760 | 0.025799559377 |
| H536 | H | 0.280561017152 | 0.306419967757 | 0.974200440623 |
| H537 | H | 0.779896238236 | 0.872335542247 | 0.038573643762 |
| H538 | H | 0.220103761764 | 0.372335542243 | 0.961426356238 |
| H539 | H | 0.758101558165 | 0.795023553381 | 0.066585034178 |
| H540 | H | 0.241898441835 | 0.295023553378 | 0.933414965822 |
| H541 | H | 0.918608174493 | 0.695340465845 | 0.003660649748 |
| H542 | H | 0.081391825507 | 0.195340465842 | 0.996339350252 |
| H543 | H | 0.998624620510 | 0.789111196243 | 0.050622576968 |

|      |   |                |                |                |
|------|---|----------------|----------------|----------------|
| H544 | H | 0.001375379490 | 0.289111196239 | 0.949377423032 |
| H545 | H | 0.029266969721 | 0.627764404421 | 0.022969580621 |
| H546 | H | 0.970733030279 | 0.127764404417 | 0.977030419379 |
| H547 | H | 0.948007271617 | 0.641722822026 | 0.069981775297 |
| H548 | H | 0.051992728383 | 0.141722822022 | 0.930018224703 |
| H549 | H | 0.126460181974 | 0.704800024399 | 0.035688346779 |
| H550 | H | 0.873539818026 | 0.204800024396 | 0.964311653221 |
| H551 | H | 0.115811339233 | 0.630152970269 | 0.067025315517 |
| H552 | H | 0.884188660767 | 0.130152970266 | 0.932974684483 |
| H553 | H | 0.095494449433 | 0.726021901897 | 0.078437296804 |
| H554 | H | 0.904505550567 | 0.226021901893 | 0.921562703196 |
| H555 | H | 0.015198647156 | 0.884404288320 | 0.009127869354 |
| H556 | H | 0.984801352844 | 0.384404288316 | 0.990872130646 |
| H557 | H | 0.059112604169 | 0.834889008864 | 0.939931274309 |
| H558 | H | 0.940887395831 | 0.334889008861 | 0.060068725691 |
| H559 | H | 0.039097899920 | 0.999192086883 | 0.967185228331 |
| H560 | H | 0.960902100080 | 0.499192086879 | 0.032814771669 |
| H561 | H | 0.066582299264 | 0.973476642290 | 0.924963725620 |
| H562 | H | 0.933417700736 | 0.473476642287 | 0.075036274380 |
| H563 | H | 0.251876872340 | 0.863837962216 | 0.988329200197 |
| H564 | H | 0.748123127660 | 0.363837962213 | 0.011670799803 |
| H565 | H | 0.311161233459 | 0.752425951167 | 0.942396347247 |
| H566 | H | 0.688838766541 | 0.252425951164 | 0.057603652753 |
| H567 | H | 0.277712323874 | 0.731720313743 | 0.983939232178 |
| H568 | H | 0.722287676126 | 0.231720313739 | 0.016060767822 |
| H569 | H | 0.229571124333 | 0.680485522643 | 0.918189410242 |
| H570 | H | 0.770428875667 | 0.180485522639 | 0.081810589758 |
| H571 | H | 0.186820548124 | 0.676960818018 | 0.958804522053 |
| H572 | H | 0.813179451876 | 0.176960818015 | 0.041195477947 |
| H573 | H | 0.180394866151 | 0.800625730408 | 0.902587913692 |
| H574 | H | 0.819605133849 | 0.300625730404 | 0.097412086308 |
| H575 | H | 0.117802401523 | 0.759536167554 | 0.928591479150 |
| H576 | H | 0.882197598477 | 0.259536167550 | 0.071408520850 |
| H577 | H | 0.362387587630 | 0.894368529399 | 0.966528559506 |
| H578 | H | 0.637612412370 | 0.394368529396 | 0.033471440494 |
| H579 | H | 0.356936871541 | 0.022288383500 | 0.925105291661 |
| H580 | H | 0.643063128459 | 0.522288383496 | 0.074894708339 |
| H581 | H | 0.427085175119 | 0.969348915013 | 0.933593803213 |
| H582 | H | 0.572914824881 | 0.469348915010 | 0.066406196787 |
| H583 | H | 0.355677190841 | 0.836208238825 | 0.888831004957 |
| H584 | H | 0.644322809159 | 0.336208238821 | 0.111168995043 |
| H585 | H | 0.410209435992 | 0.885252276044 | 0.822330181444 |
| H586 | H | 0.589790564008 | 0.385252276041 | 0.177669818556 |
| H587 | H | 0.367208765183 | 0.755335237634 | 0.803834432848 |
| H588 | H | 0.632791234817 | 0.255335237631 | 0.196165567152 |
| H589 | H | 0.424334226609 | 0.750877523851 | 0.837126680490 |
| H590 | H | 0.575665773392 | 0.250877523847 | 0.162873319510 |
| H591 | H | 0.260573125613 | 0.828681857556 | 0.856058252036 |
| H592 | H | 0.739426874387 | 0.328681857553 | 0.143941747963 |
| H593 | H | 0.200091373597 | 0.929097378208 | 0.802241384408 |
| H594 | H | 0.799908626403 | 0.429097378204 | 0.197758615592 |
| H595 | H | 0.140307538579 | 0.796307255734 | 0.843261368543 |
| H596 | H | 0.859692461421 | 0.296307255730 | 0.156738631457 |
| H597 | H | 0.100594288821 | 0.854638568135 | 0.812776063693 |
| H598 | H | 0.899405711179 | 0.354638568131 | 0.187223936307 |
| H599 | H | 0.227804602382 | 0.705384807549 | 0.823061364925 |
| H600 | H | 0.772195397618 | 0.205384807546 | 0.176938635075 |
| H601 | H | 0.125309665070 | 0.844206291433 | 0.749774446313 |
| H602 | H | 0.874690334931 | 0.344206291430 | 0.250225553687 |
| H603 | H | 0.276896049650 | 0.632921369330 | 0.775178391819 |
| H604 | H | 0.723103950351 | 0.132921369327 | 0.224821608181 |
| H605 | H | 0.168290339039 | 0.767346798367 | 0.701773154810 |
| H606 | H | 0.831709660961 | 0.267346798363 | 0.298226845190 |

|      |   |                |                |                |
|------|---|----------------|----------------|----------------|
| H607 | H | 0.232199085351 | 0.663494224310 | 0.687705831582 |
| H608 | H | 0.767800914649 | 0.163494224306 | 0.312294168418 |
| H609 | H | 0.241054912938 | 0.024819106732 | 0.835992202714 |
| H610 | H | 0.758945087062 | 0.524819106729 | 0.164007797286 |
| H611 | H | 0.210967567796 | 0.038120132417 | 0.906941098178 |
| H612 | H | 0.789032432204 | 0.538120132413 | 0.093058901822 |
| H613 | H | 0.307744982838 | 0.094108069767 | 0.876837891558 |
| H614 | H | 0.692255017162 | 0.594108069763 | 0.123162108442 |
| H615 | H | 0.266988018608 | 0.163921939374 | 0.902822628003 |
| H616 | H | 0.733011981392 | 0.663921939371 | 0.097177371997 |
| H617 | H | 0.258276675413 | 0.164966266547 | 0.856850819416 |
| H618 | H | 0.741723324587 | 0.664966266544 | 0.143149180584 |
| H619 | H | 0.121880110452 | 0.110654317165 | 0.836978492654 |
| H620 | H | 0.878119889548 | 0.610654317162 | 0.163021507346 |
| H621 | H | 0.068405133398 | 0.228270687678 | 0.885803176482 |
| H622 | H | 0.931594866602 | 0.728270687674 | 0.114196823518 |
| H623 | H | 0.091467816309 | 0.241934361313 | 0.806899972513 |
| H624 | H | 0.908532183691 | 0.741934361309 | 0.193100027487 |
| H625 | H | 0.064327069911 | 0.315502560316 | 0.835464267078 |
| H626 | H | 0.935672930089 | 0.815502560313 | 0.164535732922 |
| H627 | H | 0.146529204762 | 0.321156566287 | 0.891376326779 |
| H628 | H | 0.853470795238 | 0.821156566283 | 0.108623673221 |
| H629 | H | 0.223774570705 | 0.329941195644 | 0.875244317314 |
| H630 | H | 0.776225429295 | 0.829941195641 | 0.124755682685 |
| C1   | C | 0.669048416985 | 0.773316205126 | 0.903978490027 |
| C2   | C | 0.330951583015 | 0.273316205122 | 0.096021509973 |
| C3   | C | 0.720386258740 | 0.778612711599 | 0.875940724412 |
| C4   | C | 0.279613741260 | 0.278612711596 | 0.124059275588 |
| C5   | C | 0.691306001128 | 0.817407063196 | 0.937210171067 |
| C6   | C | 0.308693998872 | 0.317407063193 | 0.062789828933 |
| C7   | C | 0.683702918126 | 0.904059695902 | 0.933369417756 |
| C8   | C | 0.316297081874 | 0.404059695899 | 0.066630582244 |
| C9   | C | 0.764564485202 | 0.858324297621 | 0.830111288910 |
| C10  | C | 0.235435514798 | 0.358324297617 | 0.169888711090 |
| C11  | C | 0.819272347691 | 0.900964061514 | 0.847771878587 |
| C12  | C | 0.180727652309 | 0.400964061510 | 0.152228121413 |
| C13  | C | 0.737021509070 | 0.906261210017 | 0.799698665382 |
| C14  | C | 0.262978490930 | 0.406261210013 | 0.200301334617 |
| C15  | C | 0.702554906941 | 0.852394468981 | 0.774672751705 |
| C16  | C | 0.297445093059 | 0.352394468978 | 0.225327248295 |
| C17  | C | 0.936516285810 | 0.919823117015 | 0.840962497825 |
| C18  | C | 0.063483714190 | 0.419823117012 | 0.159037502175 |
| C19  | C | 0.969940676551 | 0.933448264646 | 0.805911498204 |
| C20  | C | 0.030059323449 | 0.433448264642 | 0.194088501796 |
| C21  | C | 0.980312197862 | 0.870911083841 | 0.863997692831 |
| C22  | C | 0.019687802138 | 0.370911083838 | 0.136002307169 |
| C23  | C | 0.031881060352 | 0.020733125233 | 0.770374776987 |
| C24  | C | 0.968118939648 | 0.520733125230 | 0.229625223013 |
| C25  | C | 0.104077147627 | 0.030915272805 | 0.770308783300 |
| C26  | C | 0.895922852373 | 0.530915272802 | 0.229691216699 |
| C27  | C | 0.999575088459 | 0.096568086191 | 0.759792006318 |
| C28  | C | 0.000424911541 | 0.596568086187 | 0.240207993681 |
| C29  | C | 0.205020081229 | 0.011636737783 | 0.738515086904 |
| C30  | C | 0.794979918771 | 0.511636737780 | 0.261484913096 |
| C31  | C | 0.233372976833 | 0.092282995653 | 0.739837880086 |
| C32  | C | 0.766627023167 | 0.592282995650 | 0.260162119914 |
| C33  | C | 0.218960022245 | 0.971435110007 | 0.703486395359 |
| C34  | C | 0.781039977755 | 0.471435110003 | 0.296513604641 |
| C35  | C | 0.158987800900 | 0.986724335042 | 0.682305339972 |
| C36  | C | 0.841012199100 | 0.486724335039 | 0.317694660028 |
| C37  | C | 0.105751436117 | 0.979555517173 | 0.708886103154 |
| C38  | C | 0.894248563883 | 0.479555517169 | 0.291113896846 |
| C39  | C | 0.218167746827 | 0.230649349752 | 0.736471752801 |

|      |   |                |                |                |
|------|---|----------------|----------------|----------------|
| C40  | C | 0.781832253173 | 0.730649349748 | 0.263528247199 |
| C41  | C | 0.161395191361 | 0.283484119851 | 0.742307245710 |
| C42  | C | 0.838604808639 | 0.783484119847 | 0.257692754289 |
| C43  | C | 0.253702381493 | 0.255805597103 | 0.703520856935 |
| C44  | C | 0.746297618507 | 0.755805597100 | 0.296479143065 |
| C45  | C | 0.127979849768 | 0.414643841451 | 0.756614097167 |
| C46  | C | 0.872020150232 | 0.914643841448 | 0.243385902833 |
| C47  | C | 0.091610055069 | 0.433979236646 | 0.723265380776 |
| C48  | C | 0.908389944931 | 0.933979236642 | 0.276734619223 |
| C49  | C | 0.157492556087 | 0.485698278014 | 0.774735854485 |
| C50  | C | 0.842507443914 | 0.985698278011 | 0.225264145515 |
| C51  | C | 0.175667180407 | 0.464279808977 | 0.812291145632 |
| C52  | C | 0.824332819593 | 0.964279808973 | 0.187708854368 |
| C53  | C | 0.111892995502 | 0.553585910199 | 0.773003932555 |
| C54  | C | 0.888107004498 | 0.053585910195 | 0.226996067445 |
| C55  | C | 0.205461897146 | 0.527889395071 | 0.834239877685 |
| C56  | C | 0.794538102854 | 0.027889395068 | 0.165760122315 |
| C57  | C | 0.093658725509 | 0.455288220204 | 0.660579990526 |
| C58  | C | 0.906341274491 | 0.955288220200 | 0.339420009474 |
| C59  | C | 0.057565948429 | 0.383247485487 | 0.648883427738 |
| C60  | C | 0.942434051571 | 0.883247485483 | 0.351116572262 |
| C61  | C | 0.139108872202 | 0.488103524748 | 0.632461102965 |
| C62  | C | 0.860891127798 | 0.988103524744 | 0.367538897035 |
| C63  | C | 0.110013361458 | 0.483410449502 | 0.596055819568 |
| C64  | C | 0.889986638542 | 0.983410449499 | 0.403944180432 |
| C65  | C | 0.156967663515 | 0.571097030707 | 0.642259863931 |
| C66  | C | 0.843032336485 | 0.071097030704 | 0.357740136068 |
| C67  | C | 0.043227847487 | 0.245486587315 | 0.648842711955 |
| C68  | C | 0.956772152513 | 0.745486587312 | 0.351157288045 |
| C69  | C | 0.979570630562 | 0.252250857443 | 0.668191303736 |
| C70  | C | 0.020429369438 | 0.752250857439 | 0.331808696264 |
| C71  | C | 0.077303930920 | 0.170856528717 | 0.657992249316 |
| C72  | C | 0.922696069080 | 0.670856528713 | 0.342007750684 |
| C73  | C | 0.922550606168 | 0.291783066580 | 0.720676896107 |
| C74  | C | 0.077449393832 | 0.791783066577 | 0.279323103893 |
| C75  | C | 0.881159962104 | 0.354080395942 | 0.703320245441 |
| C76  | C | 0.118840037896 | 0.854080395938 | 0.296679754559 |
| C77  | C | 0.936039479509 | 0.308985643988 | 0.759107227539 |
| C78  | C | 0.063960520491 | 0.808985643985 | 0.240892772461 |
| C79  | C | 0.875730110829 | 0.322215413123 | 0.780972591849 |
| C80  | C | 0.124269889171 | 0.822215413119 | 0.219027408151 |
| C81  | C | 0.831439556722 | 0.252937114990 | 0.786250109234 |
| C82  | C | 0.168560443278 | 0.752937114987 | 0.213749890766 |
| C83  | C | 0.825600795076 | 0.138466745775 | 0.824689483362 |
| C84  | C | 0.174399204924 | 0.638466745771 | 0.175310516637 |
| C85  | C | 0.871042938059 | 0.476413344105 | 0.672640529977 |
| C86  | C | 0.128957061941 | 0.976413344102 | 0.327359470023 |
| C87  | C | 0.835284722374 | 0.439790544510 | 0.641917461819 |
| C88  | C | 0.164715277626 | 0.939790544506 | 0.358082538181 |
| C89  | C | 0.912809979855 | 0.541696569324 | 0.658205112704 |
| C90  | C | 0.087190020145 | 0.041696569320 | 0.341794887296 |
| C91  | C | 0.848341704289 | 0.363164253864 | 0.588887841256 |
| C92  | C | 0.151658295711 | 0.863164253860 | 0.411112158744 |
| C93  | C | 0.797848478754 | 0.300444560274 | 0.596305418399 |
| C94  | C | 0.202151521247 | 0.800444560271 | 0.403694581601 |
| C95  | C | 0.905006128587 | 0.333550660599 | 0.567273119476 |
| C96  | C | 0.094993871413 | 0.833550660596 | 0.432726880523 |
| C97  | C | 0.950694122431 | 0.399281655579 | 0.556804748062 |
| C98  | C | 0.049305877569 | 0.899281655576 | 0.443195251938 |
| C99  | C | 0.767196690947 | 0.199548322013 | 0.638600828348 |
| C100 | C | 0.232803309054 | 0.699548322009 | 0.361399171652 |
| C101 | C | 0.704634412469 | 0.237839425728 | 0.649618884513 |
| C102 | C | 0.295365587531 | 0.737839425724 | 0.350381115487 |

|      |   |                |                |                |
|------|---|----------------|----------------|----------------|
| C103 | C | 0.800802253886 | 0.161543421980 | 0.669817396645 |
| C104 | C | 0.199197746114 | 0.661543421977 | 0.330182603355 |
| C105 | C | 0.758151688060 | 0.115764757067 | 0.693451098725 |
| C106 | C | 0.241848311941 | 0.615764757063 | 0.306548901275 |
| C107 | C | 0.722369678286 | 0.152442136657 | 0.719535858251 |
| C108 | C | 0.277630321715 | 0.652442136653 | 0.280464141749 |
| C109 | C | 0.753595259308 | 0.035851368443 | 0.689760087326 |
| C110 | C | 0.246404740692 | 0.535851368440 | 0.310239912674 |
| C111 | C | 0.681909814891 | 0.109559511727 | 0.740820031417 |
| C112 | C | 0.318090185109 | 0.609559511724 | 0.259179968583 |
| C113 | C | 0.713115101699 | 0.992952757411 | 0.711089047374 |
| C114 | C | 0.286884898301 | 0.492952757407 | 0.288910952626 |
| C115 | C | 0.676897539902 | 0.029910525247 | 0.736583261664 |
| C116 | C | 0.323102460098 | 0.529910525244 | 0.263416738336 |
| C117 | C | 0.654611605988 | 0.345867549420 | 0.679834461874 |
| C118 | C | 0.345388394012 | 0.845867549416 | 0.320165538126 |
| C119 | C | 0.611659110938 | 0.374249481082 | 0.650362528401 |
| C120 | C | 0.388340889062 | 0.874249481078 | 0.349637471599 |
| C121 | C | 0.675072724892 | 0.414139430949 | 0.702145747311 |
| C122 | C | 0.324927275108 | 0.914139430946 | 0.297854252689 |
| C123 | C | 0.706155100720 | 0.391244802803 | 0.736403422362 |
| C124 | C | 0.293844899281 | 0.891244802799 | 0.263596577638 |
| C125 | C | 0.605615193983 | 0.419459449708 | 0.590389442052 |
| C126 | C | 0.394384806017 | 0.919459449704 | 0.409610557948 |
| C127 | C | 0.569989417612 | 0.348680236140 | 0.576877067838 |
| C128 | C | 0.430010582388 | 0.848680236136 | 0.423122932161 |
| C129 | C | 0.649117931079 | 0.456619187978 | 0.562560083168 |
| C130 | C | 0.350882068921 | 0.956619187975 | 0.437439916832 |
| C131 | C | 0.618869021309 | 0.453519957637 | 0.526583921443 |
| C132 | C | 0.381130978691 | 0.953519957634 | 0.473416078557 |
| C133 | C | 0.663985322510 | 0.539113766767 | 0.573573124437 |
| C134 | C | 0.336014677490 | 0.039113766763 | 0.426426875563 |
| C135 | C | 0.572819830231 | 0.210259491150 | 0.566864670315 |
| C136 | C | 0.427180169769 | 0.710259491146 | 0.433135329685 |
| C137 | C | 0.515684733230 | 0.192432954295 | 0.590914997880 |
| C138 | C | 0.484315266770 | 0.692432954292 | 0.409085002120 |
| C139 | C | 0.624377472452 | 0.147890547199 | 0.565981293483 |
| C140 | C | 0.375622527548 | 0.647890547196 | 0.434018706516 |
| C141 | C | 0.470103509773 | 0.182437148266 | 0.648722470540 |
| C142 | C | 0.529896490227 | 0.682437148263 | 0.351277529460 |
| C143 | C | 0.413783282914 | 0.237927883094 | 0.643976924917 |
| C144 | C | 0.586216717086 | 0.737927883090 | 0.356023075083 |
| C145 | C | 0.490630211764 | 0.183596831767 | 0.687073760271 |
| C146 | C | 0.509369788236 | 0.683596831764 | 0.312926239728 |
| C147 | C | 0.543888174175 | 0.127301102268 | 0.697273480280 |
| C148 | C | 0.456111825825 | 0.627301102264 | 0.302726519720 |
| C149 | C | 0.527456012329 | 0.041065002889 | 0.700388106962 |
| C150 | C | 0.472543987671 | 0.541065002886 | 0.299611893038 |
| C151 | C | 0.442516412685 | 0.016954672345 | 0.745110995336 |
| C152 | C | 0.557483587315 | 0.516954672341 | 0.254889004664 |
| C153 | C | 0.380978748689 | 0.373167157621 | 0.635465617822 |
| C154 | C | 0.619021251311 | 0.873167157617 | 0.364534382178 |
| C155 | C | 0.316213949430 | 0.351867454360 | 0.620263729994 |
| C156 | C | 0.683786050570 | 0.851867454357 | 0.379736270006 |
| C157 | C | 0.406514285750 | 0.446082502588 | 0.616712997811 |
| C158 | C | 0.593485714250 | 0.946082502585 | 0.383287002189 |
| C159 | C | 0.404665269644 | 0.520490502952 | 0.638331990057 |
| C160 | C | 0.595334730356 | 0.020490502949 | 0.361668009943 |
| C161 | C | 0.430898445837 | 0.586613954134 | 0.616061267223 |
| C162 | C | 0.569101554163 | 0.086613954131 | 0.383938732777 |
| C163 | C | 0.338221226928 | 0.540551816366 | 0.652348922995 |
| C164 | C | 0.661778773072 | 0.040551816363 | 0.347651077005 |
| C165 | C | 0.248989884212 | 0.308826310073 | 0.572757576497 |



|      |   |                |                |                |
|------|---|----------------|----------------|----------------|
| C166 | C | 0.751010115788 | 0.808826310069 | 0.427242423503 |
| C167 | C | 0.214859468763 | 0.236197988022 | 0.586098852249 |
| C168 | C | 0.785140531237 | 0.736197988019 | 0.413901147751 |
| C169 | C | 0.264639701068 | 0.300319271272 | 0.533989673920 |
| C170 | C | 0.735360298933 | 0.800319271268 | 0.466010326080 |
| C171 | C | 0.330672510494 | 0.263573900742 | 0.533726039802 |
| C172 | C | 0.669327489507 | 0.763573900739 | 0.466273960198 |
| C173 | C | 0.364494404088 | 0.305370705825 | 0.563229428891 |
| C174 | C | 0.635505595912 | 0.805370705822 | 0.436770571109 |
| C175 | C | 0.224273234959 | 0.115447620945 | 0.618449298602 |
| C176 | C | 0.775726765041 | 0.615447620942 | 0.381550701398 |
| C177 | C | 0.264319562004 | 0.043679307684 | 0.612926934845 |
| C178 | C | 0.735680437996 | 0.543679307681 | 0.387073065155 |
| C179 | C | 0.360510509220 | 0.985084666728 | 0.591630483995 |
| C180 | C | 0.639489490780 | 0.485084666724 | 0.408369516005 |
| C181 | C | 0.380905541646 | 0.952657199607 | 0.626899670828 |
| C182 | C | 0.619094458354 | 0.452657199603 | 0.373100329172 |
| C183 | C | 0.419946610758 | 0.006416345380 | 0.569977375319 |
| C184 | C | 0.580053389242 | 0.506416345377 | 0.430022624681 |
| C185 | C | 0.450887066438 | 0.933950775067 | 0.555750747223 |
| C186 | C | 0.549112933562 | 0.433950775064 | 0.444249252777 |
| C187 | C | 0.389106083150 | 0.847209410044 | 0.667707774206 |
| C188 | C | 0.610893916850 | 0.347209410041 | 0.332292225794 |
| C189 | C | 0.461593987607 | 0.841678461553 | 0.671003227916 |
| C190 | C | 0.538406012393 | 0.341678461550 | 0.328996772084 |
| C191 | C | 0.358532302293 | 0.766367905044 | 0.669414798501 |
| C192 | C | 0.641467697707 | 0.266367905041 | 0.330585201499 |
| C193 | C | 0.302005830969 | 0.772508606963 | 0.644717536184 |
| C194 | C | 0.697994169032 | 0.272508606960 | 0.355282463816 |
| C195 | C | 0.326531660225 | 0.825334165325 | 0.615754472084 |
| C196 | C | 0.673468339775 | 0.325334165321 | 0.384245527916 |
| C197 | C | 0.545228007399 | 0.826590698860 | 0.717182416486 |
| C198 | C | 0.454771992601 | 0.326590698856 | 0.282817583514 |
| C199 | C | 0.588221886223 | 0.781119562346 | 0.692050624318 |
| C200 | C | 0.411778113777 | 0.281119562342 | 0.307949375682 |
| C201 | C | 0.543078751191 | 0.785967477475 | 0.752841635087 |
| C202 | C | 0.456921248809 | 0.285967477471 | 0.247158364913 |
| C203 | C | 0.513730426001 | 0.831853716214 | 0.783315173511 |
| C204 | C | 0.486269573999 | 0.331853716210 | 0.216684826489 |
| C205 | C | 0.562175773074 | 0.880799110606 | 0.803449812011 |
| C206 | C | 0.437824226926 | 0.380799110602 | 0.196550187989 |
| C207 | C | 0.612825400625 | 0.657304491894 | 0.664215562470 |
| C208 | C | 0.387174599375 | 0.157304491891 | 0.335784437530 |
| C209 | C | 0.631799678964 | 0.686304756870 | 0.627976599850 |
| C210 | C | 0.368200321036 | 0.186304756867 | 0.372023400150 |
| C211 | C | 0.585293534335 | 0.576078140448 | 0.661358180888 |
| C212 | C | 0.414706465665 | 0.076078140445 | 0.338641819111 |
| C213 | C | 0.598436366261 | 0.743160006479 | 0.572998390268 |
| C214 | C | 0.401563633739 | 0.243160006475 | 0.427001609732 |
| C215 | C | 0.644274169245 | 0.811614100474 | 0.574481954171 |
| C216 | C | 0.355725830755 | 0.311614100471 | 0.425518045829 |
| C217 | C | 0.536373124325 | 0.765122618052 | 0.554794682741 |
| C218 | C | 0.463626875675 | 0.265122618049 | 0.445205317259 |
| C219 | C | 0.495706801039 | 0.696763987351 | 0.542476489417 |
| C220 | C | 0.504293198961 | 0.196763987348 | 0.457523510582 |
| C221 | C | 0.429266827645 | 0.724430264122 | 0.531890708147 |
| C222 | C | 0.570733172355 | 0.224430264119 | 0.468109291852 |
| C223 | C | 0.528275963126 | 0.652105427232 | 0.513157825617 |
| C224 | C | 0.471724036874 | 0.152105427229 | 0.486842174383 |
| C225 | C | 0.679345816281 | 0.924414563276 | 0.606361780808 |
| C226 | C | 0.320654183720 | 0.424414563272 | 0.393638219192 |
| C227 | C | 0.746096371170 | 0.902211568009 | 0.618958273157 |
| C228 | C | 0.253903628830 | 0.402211568006 | 0.381041726843 |

|      |   |                |                |                |
|------|---|----------------|----------------|----------------|
| C229 | C | 0.647179339648 | 0.985961770077 | 0.628534609346 |
| C230 | C | 0.352820660353 | 0.485961770074 | 0.371465390654 |
| C231 | C | 0.811739387328 | 0.797214833939 | 0.643423788557 |
| C232 | C | 0.188260612672 | 0.297214833936 | 0.356576211443 |
| C233 | C | 0.849179094535 | 0.777508999501 | 0.610070661546 |
| C234 | C | 0.150820905465 | 0.277508999497 | 0.389929338454 |
| C235 | C | 0.800810600273 | 0.727841354044 | 0.667214607406 |
| C236 | C | 0.199189399727 | 0.227841354040 | 0.332785392594 |
| C237 | C | 0.855802252468 | 0.714546725993 | 0.554076987376 |
| C238 | C | 0.144197747532 | 0.214546725990 | 0.445923012624 |
| C239 | C | 0.867555108416 | 0.787058145234 | 0.531802733857 |
| C240 | C | 0.132444891585 | 0.287058145231 | 0.468197266143 |
| C241 | C | 0.823770692374 | 0.650646246568 | 0.532941159799 |
| C242 | C | 0.176229307626 | 0.150646246565 | 0.467058840201 |
| C243 | C | 0.826754654280 | 0.572126909233 | 0.550430038422 |
| C244 | C | 0.173245345720 | 0.072126909229 | 0.449569961578 |
| C245 | C | 0.832195741174 | 0.916685504839 | 0.515569483661 |
| C246 | C | 0.167804258826 | 0.416685504836 | 0.484430516339 |
| C247 | C | 0.895103953206 | 0.958467114083 | 0.523185437539 |
| C248 | C | 0.104896046794 | 0.458467114079 | 0.476814562461 |
| C249 | C | 0.774688349393 | 0.969307776274 | 0.524347347492 |
| C250 | C | 0.225311650607 | 0.469307776271 | 0.475652652508 |
| C251 | C | 0.767360468365 | 0.041417294662 | 0.502819842037 |
| C252 | C | 0.232639531635 | 0.541417294659 | 0.497180157963 |
| C253 | C | 0.755636121030 | 0.037948363767 | 0.467129887952 |
| C254 | C | 0.244363878970 | 0.537948363764 | 0.532870112047 |
| C255 | C | 0.769327711244 | 0.114575350445 | 0.518168434799 |
| C256 | C | 0.230672288756 | 0.614575350442 | 0.481831565201 |
| C257 | C | 0.748083879195 | 0.104720798652 | 0.447497887562 |
| C258 | C | 0.251916120805 | 0.604720798649 | 0.552502112438 |
| C259 | C | 0.761938155534 | 0.182084039946 | 0.498991725031 |
| C260 | C | 0.238061844466 | 0.682084039942 | 0.501008274969 |
| C261 | C | 0.752468894662 | 0.177157408552 | 0.463252956126 |
| C262 | C | 0.247531105339 | 0.677157408548 | 0.536747043874 |
| C263 | C | 0.968819894284 | 0.997370481505 | 0.569674313491 |
| C264 | C | 0.031180105716 | 0.497370481502 | 0.430325686509 |
| C265 | C | 0.025931692598 | 0.956237066462 | 0.586074796405 |
| C266 | C | 0.974068307402 | 0.456237066459 | 0.413925203595 |
| C267 | C | 0.939858872201 | 0.049104050412 | 0.598455966964 |
| C268 | C | 0.060141127799 | 0.549104050409 | 0.401544033036 |
| C269 | C | 0.890986347772 | 0.106010362260 | 0.585042840348 |
| C270 | C | 0.109013652228 | 0.606010362256 | 0.414957159651 |
| C271 | C | 0.064399284641 | 0.839459704469 | 0.613716283962 |
| C272 | C | 0.935600715359 | 0.339459704465 | 0.386283716038 |
| C273 | C | 0.047398429663 | 0.844018366291 | 0.652487503578 |
| C274 | C | 0.952601570337 | 0.344018366287 | 0.347512496422 |
| C275 | C | 0.964818455285 | 0.874011409011 | 0.695241960071 |
| C276 | C | 0.035181544715 | 0.374011409008 | 0.304758039928 |
| C277 | C | 0.942884356491 | 0.788776446580 | 0.700475796128 |
| C278 | C | 0.057115643509 | 0.288776446576 | 0.299524203872 |
| C279 | C | 0.910097774353 | 0.931596143020 | 0.701571154309 |
| C280 | C | 0.089902225647 | 0.431596143017 | 0.298428845691 |
| C281 | C | 0.908556072169 | 0.696171592884 | 0.745406750364 |
| C282 | C | 0.091443927831 | 0.196171592881 | 0.254593249636 |
| C283 | C | 0.846786532347 | 0.695586664356 | 0.765864298495 |
| C284 | C | 0.153213467653 | 0.195586664353 | 0.234135701505 |
| C285 | C | 0.965586725742 | 0.669381315994 | 0.768960443484 |
| C286 | C | 0.034413274258 | 0.169381315990 | 0.231039556516 |
| C287 | C | 0.956231356917 | 0.689534590233 | 0.807710233166 |
| C288 | C | 0.043768643083 | 0.189534590230 | 0.192289766834 |
| C289 | C | 0.027381783385 | 0.703419898525 | 0.754517043893 |
| C290 | C | 0.972618216615 | 0.203419898521 | 0.245482956107 |
| C291 | C | 0.010920646808 | 0.666039876854 | 0.831502300767 |

|      |   |                 |                |                |
|------|---|-----------------|----------------|----------------|
| C292 | C | 0.989079353192  | 0.166039876850 | 0.168497699233 |
| C293 | C | 0.777095593447  | 0.618210060086 | 0.802659301661 |
| C294 | C | 0.222904406553  | 0.118210060083 | 0.197340698339 |
| C295 | C | 0.805728816555  | 0.554264125246 | 0.824822492051 |
| C296 | C | 0.194271183445  | 0.054264125242 | 0.175177507949 |
| C297 | C | 0.705789079168  | 0.597660765130 | 0.796375492205 |
| C298 | C | 0.294210920832  | 0.097660765127 | 0.203624507795 |
| C299 | C | 0.679023448102  | 0.630096332739 | 0.762476124796 |
| C300 | C | 0.320976551898  | 0.130096332735 | 0.237523875204 |
| C301 | C | 0.665552123079  | 0.621948634035 | 0.828010205856 |
| C302 | C | 0.334447876921  | 0.121948634031 | 0.171989794144 |
| C303 | C | 0.611941523307  | 0.600204665498 | 0.755489342837 |
| C304 | C | 0.388058476694  | 0.100204665495 | 0.244510657163 |
| C305 | C | 0.821907309745  | 0.510801876981 | 0.884410820818 |
| C306 | C | 0.178092690255  | 0.010801876978 | 0.115589179182 |
| C307 | C | 0.761184399708  | 0.502391581809 | 0.906088549445 |
| C308 | C | 0.238815600292  | 0.002391581806 | 0.093911450555 |
| C309 | C | 0.881758370968  | 0.525636425501 | 0.906975616780 |
| C310 | C | 0.118241629032  | 0.025636425498 | 0.093024383220 |
| C311 | C | 0.883439972291  | 0.609372810924 | 0.920222732119 |
| C312 | C | 0.116560027709  | 0.109372810921 | 0.079777267881 |
| C313 | C | 0.941247058361  | 0.502215249931 | 0.886280688475 |
| C314 | C | 0.058752941639  | 0.002215249928 | 0.113719311525 |
| C315 | C | 0.932548464659  | 0.624211076236 | 0.948411175317 |
| C316 | C | 0.067451535341  | 0.124211076233 | 0.051588824683 |
| C317 | C | 0.692124467337  | 0.423889618371 | 0.942384239669 |
| C318 | C | 0.307875532663  | 0.923889618367 | 0.057615760331 |
| C319 | C | 0.685256169595  | 0.476176644384 | 0.974563661949 |
| C320 | C | 0.314743830405  | 0.976176644380 | 0.025436338051 |
| C321 | C | 0.690651725094  | 0.336235911186 | 0.949472764649 |
| C322 | C | 0.309348274906  | 0.836235911183 | 0.050527235351 |
| C323 | C | 0.760029194653  | 0.309443291141 | 0.945639250588 |
| C324 | C | 0.239970805347  | 0.809443291137 | 0.054360749412 |
| C325 | C | 0.788058315858  | 0.362828706684 | 0.917936730816 |
| C326 | C | 0.211941684142  | 0.862828706681 | 0.082063269184 |
| C327 | C | 0.740737793829  | 0.559812100892 | 0.016172607306 |
| C328 | C | 0.259262206171  | 0.059812100888 | 0.983827392694 |
| C329 | C | 0.758072566442  | 0.641940281776 | 0.005035616329 |
| C330 | C | 0.241927433558  | 0.141940281773 | 0.994964383671 |
| C331 | C | 0.815242260196  | 0.760556551911 | 0.022170672230 |
| C332 | C | 0.1847557739804 | 0.260556551908 | 0.977829327770 |
| C333 | C | 0.882335793825  | 0.775862723719 | 0.037144751231 |
| C334 | C | 0.117664206175  | 0.275862723716 | 0.962855248769 |
| C335 | C | 0.764987733867  | 0.811700571406 | 0.039335159279 |
| C336 | C | 0.235012266133  | 0.311700571403 | 0.960664840721 |
| C337 | C | 0.997026564024  | 0.744098110909 | 0.030595644990 |
| C338 | C | 0.002973435976  | 0.244098110906 | 0.969404355010 |
| C339 | C | 0.030982326716  | 0.770386527188 | 0.997122371348 |
| C340 | C | 0.969017673284  | 0.270386527185 | 0.002877628652 |
| C341 | C | 0.027968873954  | 0.669518699624 | 0.044717117574 |
| C342 | C | 0.972031126046  | 0.169518699621 | 0.955282882426 |
| C343 | C | 0.095779025926  | 0.684126751665 | 0.056935764624 |
| C344 | C | 0.904220974074  | 0.184126751661 | 0.943064235376 |
| C345 | C | 0.065048177221  | 0.877728421340 | 0.960407425148 |
| C346 | C | 0.934951822779  | 0.377728421337 | 0.039592574852 |
| C347 | C | 0.135643738686  | 0.886294987901 | 0.969894633729 |
| C348 | C | 0.864356261314  | 0.386294987897 | 0.030105366271 |
| C349 | C | 0.037971240295  | 0.953820456402 | 0.947227122531 |
| C350 | C | 0.962028759705  | 0.453820456399 | 0.052772877469 |
| C351 | C | 0.245986821349  | 0.841560215246 | 0.962063449837 |
| C352 | C | 0.754013178651  | 0.341560215243 | 0.037936550163 |
| C353 | C | 0.280956271170  | 0.896493956460 | 0.937208208751 |
| C354 | C | 0.719043728830  | 0.396493956456 | 0.062791791249 |

|      |   |                |                |                |
|------|---|----------------|----------------|----------------|
| C355 | C | 0.267845702724 | 0.756423019889 | 0.958266583070 |
| C356 | C | 0.732154297276 | 0.256423019885 | 0.041733416930 |
| C357 | C | 0.212213656559 | 0.714389929115 | 0.940306656950 |
| C358 | C | 0.787786343441 | 0.214389929111 | 0.059693343050 |
| C359 | C | 0.167323871935 | 0.778312041171 | 0.928316910188 |
| C360 | C | 0.832676128065 | 0.278312041168 | 0.071683089812 |
| C361 | C | 0.379009724018 | 0.964994646293 | 0.922805775503 |
| C362 | C | 0.620990275982 | 0.464994646290 | 0.077194224497 |
| C363 | C | 0.384971078241 | 0.949516387281 | 0.883707148754 |
| C364 | C | 0.615028921759 | 0.449516387278 | 0.116292851245 |
| C365 | C | 0.371310618042 | 0.857166027014 | 0.836457886262 |
| C366 | C | 0.628689381958 | 0.357166027011 | 0.163542113738 |
| C367 | C | 0.309935281844 | 0.892676880125 | 0.821387517925 |
| C368 | C | 0.690064718156 | 0.392676880122 | 0.178612482074 |
| C369 | C | 0.375403496207 | 0.769367942882 | 0.831287868153 |
| C370 | C | 0.624596503793 | 0.269367942879 | 0.168712131847 |
| C371 | C | 0.330502496709 | 0.717531625489 | 0.853613575112 |
| C372 | C | 0.669497503291 | 0.217531625486 | 0.146386424888 |
| C373 | C | 0.193199645854 | 0.896915329604 | 0.826425342861 |
| C374 | C | 0.806800354146 | 0.396915329601 | 0.173574657139 |
| C375 | C | 0.170185240053 | 0.954986707519 | 0.853851037994 |
| C376 | C | 0.829814759947 | 0.454986707516 | 0.146148962006 |
| C377 | C | 0.147230870853 | 0.830187207568 | 0.819394580286 |
| C378 | C | 0.852769129147 | 0.330187207565 | 0.180605419714 |
| C379 | C | 0.172736163075 | 0.780817871028 | 0.790160640985 |
| C380 | C | 0.827263836925 | 0.280817871025 | 0.209839359015 |
| C381 | C | 0.215517659371 | 0.720683318204 | 0.796567187532 |
| C382 | C | 0.784482340629 | 0.220683318201 | 0.203432812468 |
| C383 | C | 0.158390101016 | 0.797750137795 | 0.755623190258 |
| C384 | C | 0.841609898985 | 0.297750137791 | 0.244376809742 |
| C385 | C | 0.243133001270 | 0.678836370533 | 0.769534035249 |
| C386 | C | 0.756866998730 | 0.178836370529 | 0.230465964751 |
| C387 | C | 0.183773326415 | 0.755018235973 | 0.728203035633 |
| C388 | C | 0.816226673586 | 0.255018235970 | 0.271796964367 |
| C389 | C | 0.226335503645 | 0.695308937795 | 0.735340432748 |
| C390 | C | 0.773664496355 | 0.195308937791 | 0.264659567252 |
| C391 | C | 0.206543698096 | 0.072310791897 | 0.883160163523 |
| C392 | C | 0.793456301904 | 0.572310791893 | 0.116839836477 |
| C393 | C | 0.146054123026 | 0.119470213001 | 0.887708593298 |
| C394 | C | 0.853945876974 | 0.619470212997 | 0.112291406702 |
| C395 | C | 0.263434883135 | 0.127323042392 | 0.879653735219 |
| C396 | C | 0.736565116865 | 0.627323042389 | 0.120346264781 |
| C397 | C | 0.068705520345 | 0.203886789487 | 0.859569219591 |
| C398 | C | 0.931294479655 | 0.703886789483 | 0.140430780409 |
| C399 | C | 0.998505202330 | 0.185157064995 | 0.851928186983 |
| C400 | C | 0.001494797670 | 0.685157064992 | 0.148071813017 |
| C401 | C | 0.094458521620 | 0.263841649602 | 0.833566845443 |
| C402 | C | 0.905541478380 | 0.763841649599 | 0.166433154557 |
| C403 | C | 0.163735219819 | 0.284536736467 | 0.839814362724 |
| C404 | C | 0.836264780181 | 0.784536736463 | 0.160185637276 |
| N1   | N | 0.660190300720 | 0.690765159752 | 0.913461270651 |
| N2   | N | 0.339809699280 | 0.190765159748 | 0.086538729349 |
| N3   | N | 0.714462147171 | 0.838142806474 | 0.854370408162 |
| N4   | N | 0.285537852829 | 0.338142806471 | 0.145629591838 |
| N5   | N | 0.876270312148 | 0.882617678980 | 0.833569609201 |
| N6   | N | 0.123729687852 | 0.382617678976 | 0.166430390799 |
| N7   | N | 0.008003342664 | 0.995258081245 | 0.803840669542 |
| N8   | N | 0.991996657336 | 0.495258081242 | 0.196159330458 |
| N9   | N | 0.135028380154 | 0.009625241029 | 0.740990425784 |
| N10  | N | 0.864971619846 | 0.509625241026 | 0.259009574216 |
| N11  | N | 0.194982277522 | 0.152487431653 | 0.733999655429 |
| N12  | N | 0.805017722478 | 0.652487431649 | 0.266000344571 |
| N13  | N | 0.176711421962 | 0.357199969806 | 0.749750051434 |

|     |   |                |                |                |
|-----|---|----------------|----------------|----------------|
| N14 | N | 0.823288578038 | 0.857199969803 | 0.250249948566 |
| N15 | N | 0.125874002526 | 0.442726419478 | 0.693613686624 |
| N16 | N | 0.874125997474 | 0.942726419475 | 0.306386313376 |
| N17 | N | 0.082157601179 | 0.313233541608 | 0.655786573741 |
| N18 | N | 0.917842398821 | 0.813233541604 | 0.344213426259 |
| N19 | N | 0.981046157966 | 0.277533096341 | 0.701315727318 |
| N20 | N | 0.018953842034 | 0.777533096337 | 0.298684272682 |
| N21 | N | 0.856766173099 | 0.200034440774 | 0.812274568898 |
| N22 | N | 0.143233826901 | 0.700034440770 | 0.187725431102 |
| N23 | N | 0.770341663816 | 0.115491907173 | 0.810738335542 |
| N24 | N | 0.229658336184 | 0.615491907169 | 0.189261664458 |
| N25 | N | 0.849412019420 | 0.102119616847 | 0.852428532500 |
| N26 | N | 0.150587980580 | 0.602119616843 | 0.147571467500 |
| N27 | N | 0.908240503795 | 0.419745720258 | 0.691959582872 |
| N28 | N | 0.091759496205 | 0.919745720254 | 0.308040417128 |
| N29 | N | 0.871370628791 | 0.395047843053 | 0.621396697377 |
| N30 | N | 0.128629371209 | 0.895047843050 | 0.378603302623 |
| N31 | N | 0.000038299285 | 0.380511616303 | 0.536077766951 |
| N32 | N | 0.999961700715 | 0.880511616299 | 0.463922233049 |
| N33 | N | 0.810912703344 | 0.255383566008 | 0.623674430262 |
| N34 | N | 0.189087296656 | 0.755383566004 | 0.376325569738 |
| N35 | N | 0.709825867179 | 0.304972889016 | 0.666586916237 |
| N36 | N | 0.290174132821 | 0.804972889012 | 0.333413083763 |
| N37 | N | 0.743751565377 | 0.447172274860 | 0.749807133183 |
| N38 | N | 0.256248434623 | 0.947172274857 | 0.250192866817 |
| N39 | N | 0.641318139884 | 0.400893814051 | 0.621633379729 |
| N40 | N | 0.358681860116 | 0.900893814047 | 0.378366620271 |
| N41 | N | 0.603581228897 | 0.282344042679 | 0.575904713648 |
| N42 | N | 0.396418771103 | 0.782344042676 | 0.424095286352 |
| N43 | N | 0.522548479414 | 0.201641235244 | 0.625247802055 |
| N44 | N | 0.477451520586 | 0.701641235240 | 0.374752197945 |
| N45 | N | 0.503539554433 | 0.017095308703 | 0.734598410960 |
| N46 | N | 0.496460445567 | 0.517095308699 | 0.265401589040 |
| N47 | N | 0.394373503707 | 0.019250649561 | 0.722585014892 |
| N48 | N | 0.605626496294 | 0.519250649558 | 0.277414985108 |
| N49 | N | 0.429093785050 | 0.012243569442 | 0.779058058675 |
| N50 | N | 0.570906214950 | 0.512243569438 | 0.220941941325 |
| N51 | N | 0.427785484233 | 0.311119081311 | 0.635232766129 |
| N52 | N | 0.572214515767 | 0.811119081308 | 0.364767233871 |
| N53 | N | 0.311978722420 | 0.322526742241 | 0.588124170642 |
| N54 | N | 0.688021277580 | 0.822526742238 | 0.411875829358 |
| N55 | N | 0.251186382843 | 0.185520792262 | 0.604313927543 |
| N56 | N | 0.748813617157 | 0.685520792259 | 0.395686072457 |
| N57 | N | 0.321501001932 | 0.052202861181 | 0.597515687336 |
| N58 | N | 0.678498998068 | 0.552202861177 | 0.402484312664 |
| N59 | N | 0.369536817660 | 0.877787410764 | 0.634227141478 |
| N60 | N | 0.630463182340 | 0.377787410760 | 0.365772858522 |
| N61 | N | 0.480315467387 | 0.835505554971 | 0.704525640285 |
| N62 | N | 0.519684532613 | 0.335505554968 | 0.295474359715 |
| N63 | N | 0.569010232049 | 0.709627831784 | 0.682108967352 |
| N64 | N | 0.430989767951 | 0.209627831780 | 0.317891032648 |
| N65 | N | 0.584428249470 | 0.713056317790 | 0.607663957323 |
| N66 | N | 0.415571750530 | 0.213056317786 | 0.392336042677 |
| N67 | N | 0.638011596555 | 0.858506661221 | 0.602299803916 |
| N68 | N | 0.361988403446 | 0.358506661218 | 0.397700196084 |
| N69 | N | 0.751384297432 | 0.834161658061 | 0.635129931170 |
| N70 | N | 0.248615702568 | 0.334161658057 | 0.364870068830 |
| N71 | N | 0.821827399812 | 0.730621619792 | 0.586471087292 |
| N72 | N | 0.178172600188 | 0.230621619789 | 0.413528912708 |
| N73 | N | 0.824923617151 | 0.845454823903 | 0.535163594748 |
| N74 | N | 0.175076382849 | 0.345454823900 | 0.464836405251 |
| N75 | N | 0.919314830094 | 0.948453523388 | 0.555434174036 |
| N76 | N | 0.080685169906 | 0.448453523384 | 0.444565825964 |

|      |   |                |                |                |
|------|---|----------------|----------------|----------------|
| N77  | N | 0.021957398157 | 0.878695897570 | 0.590317909166 |
| N78  | N | 0.978042601843 | 0.378695897566 | 0.409682090834 |
| N79  | N | 0.993759906992 | 0.882956298030 | 0.661390123101 |
| N80  | N | 0.006240093008 | 0.382956298026 | 0.338609876899 |
| N81  | N | 0.917624312280 | 0.773698964083 | 0.731992823559 |
| N82  | N | 0.082375687720 | 0.273698964080 | 0.268007176441 |
| N83  | N | 0.818185154436 | 0.626366364309 | 0.771998374920 |
| N84  | N | 0.181814845564 | 0.126366364305 | 0.228001625080 |
| N85  | N | 0.811350145026 | 0.570633917091 | 0.858795875745 |
| N86  | N | 0.188649854974 | 0.070633917088 | 0.141204124255 |
| N87  | N | 0.751751689268 | 0.434935210892 | 0.922844892830 |
| N88  | N | 0.248248310732 | 0.934935210889 | 0.077155107170 |
| N89  | N | 0.739307946868 | 0.507104982694 | 0.987252594439 |
| N90  | N | 0.260692053132 | 0.007104982690 | 0.012747405561 |
| N91  | N | 0.799907405299 | 0.678433053309 | 0.025332566023 |
| N92  | N | 0.200092594701 | 0.178433053306 | 0.974667433977 |
| N93  | N | 0.929771085390 | 0.733858282322 | 0.022498507294 |
| N94  | N | 0.070228914610 | 0.233858282318 | 0.977501492706 |
| N95  | N | 0.031750308376 | 0.847328095368 | 0.990818696043 |
| N96  | N | 0.968249691624 | 0.347328095365 | 0.009181303957 |
| N97  | N | 0.178138272165 | 0.839948893113 | 0.954023358879 |
| N98  | N | 0.821861727835 | 0.339948893109 | 0.045976641121 |
| N99  | N | 0.344303550166 | 0.907513294306 | 0.942894994568 |
| N100 | N | 0.655696449834 | 0.407513294303 | 0.057105005432 |
| N101 | N | 0.377932731870 | 0.875827714499 | 0.873167711167 |
| N102 | N | 0.622067268130 | 0.375827714496 | 0.126832288833 |
| N103 | N | 0.255694421101 | 0.868976576733 | 0.836364213300 |
| N104 | N | 0.744305578899 | 0.368976576730 | 0.163635786700 |
| N105 | N | 0.206083949295 | 0.019745043740 | 0.854176199788 |
| N106 | N | 0.793916050705 | 0.519745043736 | 0.145823800212 |
| N107 | N | 0.111848822125 | 0.138044908418 | 0.860046091633 |
| N108 | N | 0.888151177876 | 0.638044908415 | 0.139953908367 |
| N109 | N | 0.177901721677 | 0.314460114502 | 0.871277055422 |
| N110 | N | 0.822098278323 | 0.814460114498 | 0.128722944578 |
| O1   | O | 0.765733995698 | 0.732621233346 | 0.876379380981 |
| O2   | O | 0.234266004302 | 0.232621233343 | 0.123620619019 |
| O3   | O | 0.655382974319 | 0.789833904918 | 0.965990636088 |
| O4   | O | 0.344617025681 | 0.289833904914 | 0.034009363912 |
| O5   | O | 0.811215073289 | 0.948610647706 | 0.871192558776 |
| O6   | O | 0.188784926711 | 0.448610647703 | 0.128807441224 |
| O7   | O | 0.699947219629 | 0.967848771697 | 0.813347985517 |
| O8   | O | 0.300052780371 | 0.467848771693 | 0.186652014483 |
| O9   | O | 0.962206960769 | 0.886879120325 | 0.781760047896 |
| O10  | O | 0.037793039231 | 0.386879120322 | 0.218239952104 |
| O11  | O | 0.132384688733 | 0.060020200372 | 0.795114481883 |
| O12  | O | 0.867615311267 | 0.560020200368 | 0.204885518117 |
| O13  | O | 0.291121499845 | 0.100913198686 | 0.744962293451 |
| O14  | O | 0.708878500155 | 0.600913198682 | 0.255037706549 |
| O15  | O | 0.105962123926 | 0.261749468265 | 0.737928814462 |
| O16  | O | 0.894037876074 | 0.761749468262 | 0.262071185538 |
| O17  | O | 0.209137102083 | 0.264476647548 | 0.676296214110 |
| O18  | O | 0.790862897918 | 0.764476647544 | 0.323703785890 |
| O19  | O | 0.033249070938 | 0.442014888039 | 0.724357772084 |
| O20  | O | 0.966750929062 | 0.942014888035 | 0.275642227916 |
| O21  | O | 0.005837945982 | 0.390909748430 | 0.634157818565 |
| O22  | O | 0.994162054018 | 0.890909748427 | 0.365842181435 |
| O23  | O | 0.929667572570 | 0.234001643174 | 0.653501832816 |
| O24  | O | 0.070332427430 | 0.734001643170 | 0.346498167184 |
| O25  | O | 0.823384203393 | 0.341360396775 | 0.699971379141 |
| O26  | O | 0.176615796607 | 0.841360396772 | 0.300028620859 |
| O27  | O | 0.778343989015 | 0.454325762995 | 0.636520919614 |
| O28  | O | 0.221656010985 | 0.954325762992 | 0.363479080386 |
| O29  | O | 0.943699001255 | 0.579962674007 | 0.685834788725 |

|     |   |                |                |                |
|-----|---|----------------|----------------|----------------|
| 030 | O | 0.056300998745 | 0.079962674004 | 0.314165211275 |
| 031 | O | 0.748758854015 | 0.294543199444 | 0.578756140936 |
| 032 | O | 0.251241145985 | 0.794543199440 | 0.421243859064 |
| 033 | O | 0.942057404359 | 0.465657545565 | 0.567265955582 |
| 034 | O | 0.057942595641 | 0.965657545562 | 0.432734044418 |
| 035 | O | 0.652995064882 | 0.206236878636 | 0.643412758967 |
| 036 | O | 0.347004935118 | 0.706236878632 | 0.356587241033 |
| 037 | O | 0.553064514635 | 0.373308688660 | 0.653891699493 |
| 038 | O | 0.446935485365 | 0.873308688656 | 0.346108300507 |
| 039 | O | 0.694695420746 | 0.330165367446 | 0.751267167316 |
| 040 | O | 0.305304579254 | 0.830165367443 | 0.248732832684 |
| 041 | O | 0.514097390132 | 0.352962107063 | 0.567611602720 |
| 042 | O | 0.485902609868 | 0.852962107059 | 0.432388397280 |
| 043 | O | 0.464582223134 | 0.170918374002 | 0.578164564732 |
| 044 | O | 0.535417776866 | 0.670918373998 | 0.421835435267 |
| 045 | O | 0.358569856259 | 0.214809346434 | 0.648826118294 |
| 046 | O | 0.641430143741 | 0.714809346430 | 0.351173881706 |
| 047 | O | 0.267399546157 | 0.367868670837 | 0.637578603711 |
| 048 | O | 0.732600453843 | 0.867868670834 | 0.362421396289 |
| 049 | O | 0.159216883497 | 0.224895374390 | 0.578107368213 |
| 050 | O | 0.840783116503 | 0.724895374387 | 0.421892631787 |
| 051 | O | 0.245496732322 | 0.979813504438 | 0.622884804666 |
| 052 | O | 0.754503267678 | 0.479813504434 | 0.377115195334 |
| 053 | O | 0.408918234805 | 0.994873674012 | 0.647846321463 |
| 054 | O | 0.591081765195 | 0.494873674009 | 0.352153678537 |
| 055 | O | 0.402425775337 | 0.058467844831 | 0.543310802390 |
| 056 | O | 0.597574224663 | 0.558467844827 | 0.456689197610 |
| 057 | O | 0.497980337663 | 0.836351764136 | 0.645874039877 |
| 058 | O | 0.502019662337 | 0.336351764132 | 0.354125960123 |
| 059 | O | 0.640505651003 | 0.807071759280 | 0.683332855400 |
| 060 | O | 0.359494348997 | 0.307071759276 | 0.316667144600 |
| 061 | O | 0.586425279726 | 0.850599441219 | 0.829734270832 |
| 062 | O | 0.413574720274 | 0.350599441216 | 0.170265729168 |
| 063 | O | 0.576233957575 | 0.947313992034 | 0.791179280027 |
| 064 | O | 0.423766042425 | 0.447313992030 | 0.208820719973 |
| 065 | O | 0.687374406198 | 0.681250568114 | 0.617821108129 |
| 066 | O | 0.312625593802 | 0.181250568111 | 0.382178891871 |
| 067 | O | 0.684165111260 | 0.822558821943 | 0.551407576437 |
| 068 | O | 0.315834888740 | 0.322558821940 | 0.448592423563 |
| 069 | O | 0.791370169859 | 0.946170700615 | 0.612720209897 |
| 070 | O | 0.208629830141 | 0.446170700612 | 0.387279790103 |
| 071 | O | 0.902615244018 | 0.805508200662 | 0.605410915244 |
| 072 | O | 0.097384755982 | 0.305508200658 | 0.394589084756 |
| 073 | O | 0.914792680107 | 0.790645500095 | 0.512910850460 |
| 074 | O | 0.085207319893 | 0.290645500092 | 0.487089149540 |
| 075 | O | 0.759755559333 | 0.675963187990 | 0.527047410241 |
| 076 | O | 0.240244440667 | 0.175963187987 | 0.472952589759 |
| 077 | O | 0.919149369362 | 0.000378412960 | 0.500885437671 |
| 078 | O | 0.080850630638 | 0.500378412956 | 0.499114562329 |
| 079 | O | 0.747269678461 | 0.244415994050 | 0.444764922598 |
| 080 | O | 0.252730321539 | 0.744415994046 | 0.555235077402 |
| 081 | O | 0.070687504079 | 0.994746857116 | 0.597000788163 |
| 082 | O | 0.929312495921 | 0.494746857113 | 0.402999211837 |
| 083 | O | 0.914080863845 | 0.000541833145 | 0.625116033408 |
| 084 | O | 0.085919136155 | 0.500541833142 | 0.374883966592 |
| 085 | O | 0.082706511425 | 0.813099043413 | 0.673830818025 |
| 086 | O | 0.917293488575 | 0.313099043409 | 0.326169181975 |
| 087 | O | 0.950122740299 | 0.740248721392 | 0.677325229445 |
| 088 | O | 0.049877259701 | 0.240248721388 | 0.322674770555 |
| 089 | O | 0.825748474351 | 0.756135817491 | 0.778090401245 |
| 090 | O | 0.174251525649 | 0.256135817487 | 0.221909598755 |
| 091 | O | 0.820708324245 | 0.491584686521 | 0.811671519115 |
| 092 | O | 0.179291675755 | 0.991584686518 | 0.188328480885 |

|      |   |                |                |                |
|------|---|----------------|----------------|----------------|
| O93  | O | 0.721702142265 | 0.555316637404 | 0.908606922335 |
| O94  | O | 0.278297857735 | 0.055316637400 | 0.091393077665 |
| O95  | O | 0.631782948310 | 0.487062139301 | 0.986914674657 |
| O96  | O | 0.368217051690 | 0.987062139297 | 0.013085325343 |
| O97  | O | 0.732603974411 | 0.671858846233 | 0.979217535550 |
| O98  | O | 0.267396025590 | 0.171858846230 | 0.020782464450 |
| O99  | O | 0.891552331192 | 0.824629511176 | 0.059804772798 |
| O100 | O | 0.108447668808 | 0.324629511173 | 0.940195227202 |
| O101 | O | 0.054076385882 | 0.723131500967 | 0.976786471569 |
| O102 | O | 0.945923614118 | 0.223131500963 | 0.023213528431 |
| O103 | O | 0.994238915289 | 0.639280157089 | 0.073261930048 |
| O104 | O | 0.005761084711 | 0.139280157085 | 0.926738069952 |
| O105 | O | 0.149797191932 | 0.933059658274 | 0.993177871045 |
| O106 | O | 0.850202808068 | 0.433059658271 | 0.006822128955 |
| O107 | O | 0.253945902861 | 0.927627989068 | 0.912888669678 |
| O108 | O | 0.746054097139 | 0.427627989065 | 0.087111330322 |
| O109 | O | 0.397619990619 | 0.003491086423 | 0.863994693040 |
| O110 | O | 0.602380009381 | 0.503491086420 | 0.136005306960 |
| O111 | O | 0.311978728206 | 0.940527491007 | 0.797249244171 |
| O112 | O | 0.688021271794 | 0.440527491003 | 0.202750755829 |
| O113 | O | 0.299480194021 | 0.751483372055 | 0.878146813854 |
| O114 | O | 0.700519805979 | 0.251483372051 | 0.121853186146 |
| O115 | O | 0.328799992879 | 0.648428877068 | 0.845817131644 |
| O116 | O | 0.671200007121 | 0.148428877065 | 0.154182868356 |
| O117 | O | 0.125347604979 | 0.943337528477 | 0.873937958131 |
| O118 | O | 0.874652395021 | 0.443337528474 | 0.126062041869 |
| O119 | O | 0.252814239245 | 0.650748012151 | 0.709408436363 |
| O120 | O | 0.747185760755 | 0.150748012148 | 0.290591563637 |
| O121 | O | 0.134000229011 | 0.144243668605 | 0.917675941054 |
| O122 | O | 0.865999770989 | 0.644243668601 | 0.082324058946 |
| O123 | O | 0.982442586012 | 0.115794032366 | 0.847069624301 |
| O124 | O | 0.017557413988 | 0.615794032363 | 0.152930375699 |
| O125 | O | 0.205037679680 | 0.274875805766 | 0.817264890330 |
| O126 | O | 0.794962320321 | 0.774875805762 | 0.182735109670 |
| O127 | O | 0.962003215603 | 0.242655606329 | 0.850696359830 |
| O128 | O | 0.037996784397 | 0.742655606326 | 0.149303640170 |
| S1   | S | 0.946910271287 | 0.846260560325 | 0.906714145022 |
| S2   | S | 0.053089728713 | 0.346260560321 | 0.093285854978 |
| S3   | S | 0.916790539340 | 0.083136663073 | 0.746460406696 |
| S4   | S | 0.083209460660 | 0.583136663070 | 0.253539593304 |
| S5   | S | 0.596106809095 | 0.049344066820 | 0.559963163275 |
| S6   | S | 0.403893190905 | 0.549344066816 | 0.440036836725 |
| S7   | S | 0.570730238440 | 0.016176948940 | 0.610199487293 |
| S8   | S | 0.429269761560 | 0.516176948936 | 0.389800512707 |
| S9   | S | 0.928531637109 | 0.035703181074 | 0.696911592177 |
| S10  | S | 0.071468362891 | 0.535703181071 | 0.303088407823 |
| S11  | S | 0.953286066695 | 0.948920430483 | 0.934499320238 |
| S12  | S | 0.046713933305 | 0.448920430479 | 0.065500679762 |

#END

## 2) CRAMBIN CRYSTAL – optimized 84W

```

data_CSD_CIF_MOLDRAW
_audit_creation_date 09-04-2015
_audit_creation_method MOLDRAW
_chemical_formula_sum 'H798 C404 N110 O212 S12'
_chemical_formula_moiety

```



```

;
H798 C404 N110 O212 S12
;
loop_
  _publ_author_name
  Delle Piane, Corno, Orlando, Dovesi, Ugliengo
  _cell_volume 15471.6953
  _exptl_crystal_density_diffn ?
  _diffn_ambient_temperature ?
  _refine_ls_R_factor_gt ?
  _refine_ls_wR_factor_gt ?
  _symmetry_space_group_name_H-M 'P 1'
  _symmetry_cell_setting monoclinic
  _symmetry_Int_Tables_number 1
loop_
  _symmetry_equiv_pos_site_id
  _symmetry_equiv_pos_as_xyz
  1 x,y,z
  _cell_length_a 21.7410932
  _cell_length_b 17.8523195
  _cell_length_c 39.8623203
  _cell_angle_alpha 90
  _cell_angle_beta 89.897202
  _cell_angle_gamma 90
  _cell_formula_units_Z 1
loop_
  _atom_type_symbol
  _atom_type_radius_bond
  H .38
  C .77
  N .75
  O .73
  S 1.04
loop_
  _atom_site_label
  _atom_site_type_symbol
  _atom_site_fract_x
  _atom_site_fract_y
  _atom_site_fract_z
  H1 H 0.687337736790 0.692560758752 0.910104710761
  H2 H 0.312662263210 0.192560758752 0.089895289239
  H3 H 0.621590265058 0.733773375377 0.894589781017
  H4 H 0.378409734942 0.233773375377 0.105410218983
  H5 H 0.637452395337 0.729160278041 0.937301069221
  H6 H 0.362547604664 0.229160278041 0.062698930779
  H7 H 0.649618786138 0.853176197160 0.913659252554
  H8 H 0.350381213862 0.353176197160 0.086340747446
  H9 H 0.766179670228 0.778429817851 0.941066166204
  H10 H 0.233820329772 0.278429817851 0.058933833796
  H11 H 0.714364452187 0.753218386005 0.982406902501
  H12 H 0.285635547813 0.253218386005 0.017593097499
  H13 H 0.778894828306 0.899897664884 0.972328848105
  H14 H 0.221105171694 0.399897664884 0.027671151895
  H15 H 0.715717950024 0.938796112655 0.949880478575
  H16 H 0.284282049976 0.438796112655 0.050119521424
  H17 H 0.784241506774 0.912645729534 0.928221702936
  H18 H 0.215758493226 0.412645729534 0.071778297064
  H19 H 0.709650292388 0.929642874694 0.878324467184
  H20 H 0.290349707612 0.429642874694 0.121675532816
  H21 H 0.785479536145 0.840295398837 0.830484455850
  H22 H 0.214520463855 0.340295398837 0.169515544150
  H23 H 0.772620896133 0.956044787253 0.792069384656
  H24 H 0.227379103867 0.456044787253 0.207930615344

```

|     |   |                |                |                |
|-----|---|----------------|----------------|----------------|
| H25 | H | 0.655114577091 | 0.982106008500 | 0.815265134191 |
| H26 | H | 0.344885422910 | 0.482106008500 | 0.184734865809 |
| H27 | H | 0.734587571563 | 0.829839069963 | 0.780376401008 |
| H28 | H | 0.265412428437 | 0.329839069963 | 0.219623598992 |
| H29 | H | 0.678432692979 | 0.896070178292 | 0.767796819783 |
| H30 | H | 0.321567307021 | 0.396070178292 | 0.232203180217 |
| H31 | H | 0.667748469231 | 0.844194812788 | 0.805554052121 |
| H32 | H | 0.332251530769 | 0.344194812788 | 0.194445947879 |
| H33 | H | 0.873298226623 | 0.871253118343 | 0.816846216817 |
| H34 | H | 0.126701773377 | 0.371253118343 | 0.183153783182 |
| H35 | H | 0.937732374648 | 0.993808594592 | 0.853972954947 |
| H36 | H | 0.062267625352 | 0.493808594592 | 0.146027045053 |
| H37 | H | 0.988796008946 | 0.837951722602 | 0.836411016595 |
| H38 | H | 0.011203991054 | 0.337951722602 | 0.163588983405 |
| H39 | H | 0.026956676040 | 0.909584177783 | 0.859447647998 |
| H40 | H | 0.973043323960 | 0.409584177783 | 0.140552352002 |
| H41 | H | 0.008116989142 | 0.059667254010 | 0.818650911465 |
| H42 | H | 0.991883010858 | 0.559667254010 | 0.181349088535 |
| H43 | H | 0.012946671377 | 0.995155961355 | 0.750094813384 |
| H44 | H | 0.987053328623 | 0.495155961355 | 0.249905186616 |
| H45 | H | 0.998751795980 | 0.158643565745 | 0.771959251007 |
| H46 | H | 0.001248204020 | 0.658643565745 | 0.228040748993 |
| H47 | H | 0.019685318886 | 0.134151461988 | 0.730648282770 |
| H48 | H | 0.980314681114 | 0.634151461988 | 0.269351717230 |
| H49 | H | 0.213346450980 | 0.006588507647 | 0.762783271113 |
| H50 | H | 0.786653549020 | 0.506588507647 | 0.237216728887 |
| H51 | H | 0.253087189589 | 0.979854043828 | 0.698840592080 |
| H52 | H | 0.746912810411 | 0.479854043828 | 0.301159407920 |
| H53 | H | 0.208262610404 | 0.912763361805 | 0.720849697223 |
| H54 | H | 0.791737389596 | 0.412763361805 | 0.279150302776 |
| H55 | H | 0.159253115924 | 0.028864261163 | 0.670786009304 |
| H56 | H | 0.840746884076 | 0.528864261163 | 0.329213990696 |
| H57 | H | 0.148495706008 | 0.931364708485 | 0.669277926841 |
| H58 | H | 0.851504293992 | 0.431364708485 | 0.330722073159 |
| H59 | H | 0.062235059441 | 0.022109410510 | 0.699069814209 |
| H60 | H | 0.937764940559 | 0.522109410510 | 0.300930185791 |
| H61 | H | 0.079935303522 | 0.933017644588 | 0.716842594394 |
| H62 | H | 0.920064696478 | 0.433017644588 | 0.283157405606 |
| H63 | H | 0.136581156947 | 0.144539577330 | 0.719787798017 |
| H64 | H | 0.863418843053 | 0.644539577330 | 0.280212201983 |
| H65 | H | 0.235170151480 | 0.244447454359 | 0.736468506007 |
| H66 | H | 0.764829848520 | 0.744447454359 | 0.263531493993 |
| H67 | H | 0.252955331636 | 0.302851429782 | 0.684173831637 |
| H68 | H | 0.747044668364 | 0.802851429782 | 0.315826168363 |
| H69 | H | 0.265414406165 | 0.206409413371 | 0.678463207790 |
| H70 | H | 0.734585593835 | 0.706409413371 | 0.321536792210 |
| H71 | H | 0.202913923580 | 0.276309795029 | 0.638770882473 |
| H72 | H | 0.797086076420 | 0.776309795029 | 0.361229117527 |
| H73 | H | 0.205648704469 | 0.367769034000 | 0.730498138572 |
| H74 | H | 0.794351295531 | 0.867769034000 | 0.269501861428 |
| H75 | H | 0.080836287200 | 0.395110961202 | 0.752785140627 |
| H76 | H | 0.919163712800 | 0.895110961202 | 0.247214859373 |
| H77 | H | 0.182153602847 | 0.496748919605 | 0.724871661763 |
| H78 | H | 0.817846397154 | 0.996748919605 | 0.275128338236 |
| H79 | H | 0.143217967214 | 0.464968220302 | 0.797536411149 |
| H80 | H | 0.856782032786 | 0.964968220302 | 0.202463588851 |
| H81 | H | 0.208529095928 | 0.427463337125 | 0.777488422817 |
| H82 | H | 0.791470904072 | 0.927463337125 | 0.222511577183 |
| H83 | H | 0.082370477145 | 0.559166401424 | 0.717673184638 |
| H84 | H | 0.917629522855 | 0.059166401423 | 0.282326815362 |
| H85 | H | 0.123916313334 | 0.602307364480 | 0.750246421690 |
| H86 | H | 0.876083686666 | 0.102307364480 | 0.249753578309 |
| H87 | H | 0.061684650521 | 0.540838144560 | 0.760007805675 |

|      |   |                |                |                |
|------|---|----------------|----------------|----------------|
| H88  | H | 0.938315349479 | 0.040838144560 | 0.239992194324 |
| H89  | H | 0.246265575164 | 0.561332304071 | 0.766506439582 |
| H90  | H | 0.753734424836 | 0.061332304071 | 0.233493560418 |
| H91  | H | 0.245398599611 | 0.535050502800 | 0.809311933468 |
| H92  | H | 0.754601400389 | 0.035050502799 | 0.190688066532 |
| H93  | H | 0.187302696923 | 0.593950923058 | 0.793265772162 |
| H94  | H | 0.812697303077 | 0.093950923058 | 0.206734227838 |
| H95  | H | 0.150595252716 | 0.425275991896 | 0.670957203225 |
| H96  | H | 0.849404747284 | 0.925275991896 | 0.329042796775 |
| H97  | H | 0.028415279311 | 0.469289033187 | 0.647282870063 |
| H98  | H | 0.971584720689 | 0.969289033187 | 0.352717129937 |
| H99  | H | 0.151570919352 | 0.446593121374 | 0.614023978610 |
| H100 | H | 0.848429080648 | 0.946593121374 | 0.385976021389 |
| H101 | H | 0.081567564159 | 0.395016898716 | 0.571388486581 |
| H102 | H | 0.918432435841 | 0.895016898716 | 0.428611513419 |
| H103 | H | 0.107372964135 | 0.484934215821 | 0.559140666193 |
| H104 | H | 0.892627035865 | 0.984934215821 | 0.440859333807 |
| H105 | H | 0.031477921726 | 0.472707893878 | 0.574900173731 |
| H106 | H | 0.968522078274 | 0.972707893878 | 0.425099826269 |
| H107 | H | 0.132591210825 | 0.584546385841 | 0.601341597398 |
| H108 | H | 0.867408789175 | 0.084546385841 | 0.398658402602 |
| H109 | H | 0.130305417974 | 0.565329810557 | 0.645016976663 |
| H110 | H | 0.869694582026 | 0.065329810557 | 0.354983023337 |
| H111 | H | 0.060864539396 | 0.578302694051 | 0.622289710016 |
| H112 | H | 0.939135460604 | 0.078302694051 | 0.377710289984 |
| H113 | H | 0.100283154777 | 0.289911638011 | 0.653117826384 |
| H114 | H | 0.899716845223 | 0.789911638011 | 0.346882173616 |
| H115 | H | 0.004644929986 | 0.220486717073 | 0.612538895519 |
| H116 | H | 0.995355070014 | 0.720486717073 | 0.387461104481 |
| H117 | H | 0.094917545907 | 0.146555585983 | 0.629427247891 |
| H118 | H | 0.905082454093 | 0.646555585983 | 0.370572752109 |
| H119 | H | 0.026511660688 | 0.105816365007 | 0.645458354871 |
| H120 | H | 0.973488339312 | 0.605816365007 | 0.354541645129 |
| H121 | H | 0.076361103858 | 0.157763370020 | 0.672585869410 |
| H122 | H | 0.923638896142 | 0.657763370020 | 0.327414130589 |
| H123 | H | 0.009744450705 | 0.279182301677 | 0.699053684009 |
| H124 | H | 0.990255549295 | 0.779182301677 | 0.300946315991 |
| H125 | H | 0.883955571647 | 0.237739045413 | 0.712911173133 |
| H126 | H | 0.116044428353 | 0.737739045413 | 0.287088826867 |
| H127 | H | 0.959979298752 | 0.272448845859 | 0.757098459583 |
| H128 | H | 0.040020701248 | 0.772448845859 | 0.242901540417 |
| H129 | H | 0.963673255653 | 0.364173692591 | 0.741193453520 |
| H130 | H | 0.036326744347 | 0.864173692591 | 0.258806546480 |
| H131 | H | 0.898271484113 | 0.369498874612 | 0.789319420786 |
| H132 | H | 0.101728515887 | 0.869498874612 | 0.210680579214 |
| H133 | H | 0.852199802743 | 0.384246497381 | 0.754107426280 |
| H134 | H | 0.147800197257 | 0.884246497381 | 0.245892573720 |
| H135 | H | 0.794075461485 | 0.305825778918 | 0.789900977779 |
| H136 | H | 0.205924538515 | 0.805825778918 | 0.210099022221 |
| H137 | H | 0.818182124519 | 0.246339229883 | 0.757210111578 |
| H138 | H | 0.181817875481 | 0.746339229883 | 0.242789888422 |
| H139 | H | 0.909347834386 | 0.240573913044 | 0.809210315045 |
| H140 | H | 0.090652165614 | 0.740573913044 | 0.190789684955 |
| H141 | H | 0.748012816383 | 0.194952858051 | 0.807774968551 |
| H142 | H | 0.251987183617 | 0.694952858051 | 0.192225031449 |
| H143 | H | 0.762343814424 | 0.101469349324 | 0.817724390639 |
| H144 | H | 0.237656185576 | 0.601469349324 | 0.182275609361 |
| H145 | H | 0.920091489136 | 0.134713673544 | 0.836800367591 |
| H146 | H | 0.079908510864 | 0.634713673544 | 0.163199632408 |
| H147 | H | 0.856023523051 | 0.085433232735 | 0.849389178213 |
| H148 | H | 0.143976476949 | 0.585433232735 | 0.150610821787 |
| H149 | H | 0.946018141272 | 0.410360313763 | 0.679562399515 |
| H150 | H | 0.053981858728 | 0.910360313763 | 0.320437600485 |

|      |   |                |                |                |
|------|---|----------------|----------------|----------------|
| H151 | H | 0.830013032238 | 0.480227929668 | 0.675226662508 |
| H152 | H | 0.169986967763 | 0.980227929668 | 0.324773337491 |
| H153 | H | 0.933111681167 | 0.494921120791 | 0.623077557714 |
| H154 | H | 0.066888318833 | 0.994921120791 | 0.376922442286 |
| H155 | H | 0.869864617624 | 0.557054036406 | 0.629569070797 |
| H156 | H | 0.130135382376 | 0.057054036406 | 0.370430929203 |
| H157 | H | 0.955107588646 | 0.600347062272 | 0.656900591444 |
| H158 | H | 0.044892411354 | 0.100347062272 | 0.343099408556 |
| H159 | H | 0.903585666711 | 0.365844960840 | 0.613599549869 |
| H160 | H | 0.096414333289 | 0.865844960840 | 0.386400450131 |
| H161 | H | 0.804712911967 | 0.373160906070 | 0.565959867243 |
| H162 | H | 0.195287088033 | 0.873160906070 | 0.434040132757 |
| H163 | H | 0.903598832656 | 0.251904197435 | 0.577024929861 |
| H164 | H | 0.096401167344 | 0.751904197435 | 0.422975070139 |
| H165 | H | 0.854605140311 | 0.258718959095 | 0.541790057435 |
| H166 | H | 0.145394859689 | 0.758718959095 | 0.458209942565 |
| H167 | H | 0.982014855395 | 0.260668490211 | 0.533942010256 |
| H168 | H | 0.017985144605 | 0.760668490211 | 0.466057989744 |
| H169 | H | 0.004637554999 | 0.350016448012 | 0.519858888589 |
| H170 | H | 0.995362445001 | 0.850016448012 | 0.480141111410 |
| H171 | H | 0.835256173138 | 0.246900746486 | 0.633618447592 |
| H172 | H | 0.164743826862 | 0.746900746486 | 0.366381552408 |
| H173 | H | 0.732629636465 | 0.149799077295 | 0.623567735844 |
| H174 | H | 0.267370363535 | 0.649799077295 | 0.376432264156 |
| H175 | H | 0.819284158184 | 0.121540937621 | 0.660694845483 |
| H176 | H | 0.180715841816 | 0.621540937621 | 0.339305154517 |
| H177 | H | 0.805161399604 | 0.202237761696 | 0.684864801723 |
| H178 | H | 0.194838600396 | 0.702237761696 | 0.315135198277 |
| H179 | H | 0.719643883371 | 0.208061699208 | 0.725608879566 |
| H180 | H | 0.280356116630 | 0.708061699208 | 0.274391120434 |
| H181 | H | 0.755824765758 | 0.008286164201 | 0.668371760080 |
| H182 | H | 0.244175234242 | 0.508286164201 | 0.331628239920 |
| H183 | H | 0.653128844756 | 0.135738201328 | 0.764149169617 |
| H184 | H | 0.346871155244 | 0.635738201328 | 0.235850830383 |
| H185 | H | 0.687631884571 | 0.935396592841 | 0.706516536742 |
| H186 | H | 0.312368115430 | 0.435396592842 | 0.293483463258 |
| H187 | H | 0.636234111315 | 0.000483381306 | 0.754878935871 |
| H188 | H | 0.363765888685 | 0.500483381306 | 0.245121064129 |
| H189 | H | 0.741729722189 | 0.319066234576 | 0.673797221584 |
| H190 | H | 0.258270277811 | 0.819066234576 | 0.326202778416 |
| H191 | H | 0.615154898878 | 0.301986994991 | 0.694401026655 |
| H192 | H | 0.384845101123 | 0.801986994991 | 0.305598973345 |
| H193 | H | 0.692580676532 | 0.446236828187 | 0.690391110687 |
| H194 | H | 0.307419323468 | 0.946236828187 | 0.309608889313 |
| H195 | H | 0.618713638533 | 0.436923642536 | 0.708555813985 |
| H196 | H | 0.381286361467 | 0.936923642536 | 0.291444186015 |
| H197 | H | 0.748068585506 | 0.472741332650 | 0.739372014685 |
| H198 | H | 0.251931414494 | 0.972741332650 | 0.260627985315 |
| H199 | H | 0.740907763013 | 0.416221662719 | 0.775291795026 |
| H200 | H | 0.259092236987 | 0.916221662719 | 0.224708204974 |
| H201 | H | 0.679084163474 | 0.383953472982 | 0.620688379838 |
| H202 | H | 0.320915836526 | 0.883953472982 | 0.379311620162 |
| H203 | H | 0.559333118600 | 0.440830292852 | 0.598510440848 |
| H204 | H | 0.440666881400 | 0.940830292852 | 0.401489559152 |
| H205 | H | 0.681713400684 | 0.408802013343 | 0.564238941640 |
| H206 | H | 0.318286599316 | 0.908802013343 | 0.435761058360 |
| H207 | H | 0.638501367326 | 0.465377004816 | 0.511967757219 |
| H208 | H | 0.361498632675 | 0.965377004816 | 0.488032242781 |
| H209 | H | 0.563256161028 | 0.462277788497 | 0.529431373464 |
| H210 | H | 0.436743838972 | 0.962277788497 | 0.470568626535 |
| H211 | H | 0.604056172470 | 0.377994992337 | 0.521446922094 |
| H212 | H | 0.395943827530 | 0.877994992337 | 0.478553077906 |
| H213 | H | 0.679192438706 | 0.550744640754 | 0.557852342032 |

|      |   |                |                |                |
|------|---|----------------|----------------|----------------|
| H214 | H | 0.320807561294 | 0.050744640754 | 0.442147657968 |
| H215 | H | 0.674270357846 | 0.522603788492 | 0.600063478508 |
| H216 | H | 0.325729642154 | 0.022603788492 | 0.399936521492 |
| H217 | H | 0.606788146482 | 0.551369726858 | 0.578637153938 |
| H218 | H | 0.393211853518 | 0.051369726858 | 0.421362846062 |
| H219 | H | 0.643178021107 | 0.270477267169 | 0.581231000084 |
| H220 | H | 0.356821978893 | 0.770477267169 | 0.418768999916 |
| H221 | H | 0.550282772744 | 0.202183087595 | 0.540665516594 |
| H222 | H | 0.449717227256 | 0.702183087595 | 0.459334483406 |
| H223 | H | 0.655259497245 | 0.152478889524 | 0.548563880485 |
| H224 | H | 0.344740502755 | 0.652478889524 | 0.451436119515 |
| H225 | H | 0.642402833130 | 0.140799591736 | 0.592263648479 |
| H226 | H | 0.357597166870 | 0.640799591736 | 0.407736351520 |
| H227 | H | 0.559294631779 | 0.215411161657 | 0.630002624275 |
| H228 | H | 0.440705368221 | 0.715411161657 | 0.369997375725 |
| H229 | H | 0.447690512102 | 0.129489593687 | 0.639744618548 |
| H230 | H | 0.552309487898 | 0.629489593687 | 0.360255381452 |
| H231 | H | 0.521049740886 | 0.238494670085 | 0.683580301952 |
| H232 | H | 0.478950259114 | 0.738494670085 | 0.316419698048 |
| H233 | H | 0.456323780954 | 0.190492896246 | 0.698713645596 |
| H234 | H | 0.543676219046 | 0.690492896246 | 0.301286354404 |
| H235 | H | 0.569579584952 | 0.109820394181 | 0.669469373305 |
| H236 | H | 0.430420415048 | 0.609820394181 | 0.330530626695 |
| H237 | H | 0.561640997955 | 0.132720384093 | 0.711935180717 |
| H238 | H | 0.438359002045 | 0.632720384093 | 0.288064819283 |
| H239 | H | 0.469995615697 | 0.035148086859 | 0.672753108000 |
| H240 | H | 0.530004384303 | 0.535148086859 | 0.327246892000 |
| H241 | H | 0.531774774758 | 0.999552081210 | 0.696267539592 |
| H242 | H | 0.468225225242 | 0.499552081210 | 0.303732460408 |
| H243 | H | 0.482073803181 | 0.077825454706 | 0.744955669440 |
| H244 | H | 0.517926196819 | 0.577825454706 | 0.255044330560 |
| H245 | H | 0.401755389315 | 0.962679752294 | 0.684682953960 |
| H246 | H | 0.598244610685 | 0.462679752294 | 0.315317046040 |
| H247 | H | 0.356096539019 | 0.923245814971 | 0.716352226422 |
| H248 | H | 0.643903460981 | 0.423245814971 | 0.283647773578 |
| H249 | H | 0.418469876059 | 0.024606082941 | 0.783701539497 |
| H250 | H | 0.581530123941 | 0.524606082941 | 0.216298460503 |
| H251 | H | 0.356943409406 | 0.969650504037 | 0.769936801688 |
| H252 | H | 0.643056590594 | 0.469650504037 | 0.230063198312 |
| H253 | H | 0.460619925910 | 0.315080430589 | 0.612428824817 |
| H254 | H | 0.539380074091 | 0.815080430589 | 0.387571175183 |
| H255 | H | 0.356470160870 | 0.369946099827 | 0.649637688410 |
| H256 | H | 0.643529839131 | 0.869946099827 | 0.350362311590 |
| H257 | H | 0.411602861996 | 0.415046345963 | 0.581884012902 |
| H258 | H | 0.588397138004 | 0.915046345963 | 0.418115987097 |
| H259 | H | 0.347808320941 | 0.460884589700 | 0.600021686882 |
| H260 | H | 0.652191679059 | 0.960884589700 | 0.399978313118 |
| H261 | H | 0.476128826413 | 0.449318385142 | 0.630965309696 |
| H262 | H | 0.523871173587 | 0.949318385142 | 0.369034690304 |
| H263 | H | 0.470677535033 | 0.526018228276 | 0.579292627073 |
| H264 | H | 0.529322464967 | 0.026018228276 | 0.420707372927 |
| H265 | H | 0.481727604534 | 0.585702857553 | 0.614307789476 |
| H266 | H | 0.518272395466 | 0.085702857553 | 0.385692210523 |
| H267 | H | 0.408026423770 | 0.578174968158 | 0.595668208594 |
| H268 | H | 0.591973576230 | 0.078174968158 | 0.404331791406 |
| H269 | H | 0.437020953394 | 0.546223664017 | 0.672063838098 |
| H270 | H | 0.562979046606 | 0.046223664017 | 0.327936161902 |
| H271 | H | 0.400445404887 | 0.458799970200 | 0.676878681411 |
| H272 | H | 0.599554595113 | 0.958799970200 | 0.323121318589 |
| H273 | H | 0.361624624322 | 0.533425490484 | 0.656104438484 |
| H274 | H | 0.638375375678 | 0.033425490484 | 0.343895561516 |
| H275 | H | 0.217236247060 | 0.279643412531 | 0.574536815572 |
| H276 | H | 0.782763752940 | 0.779643412531 | 0.425463184428 |

|      |   |                |                |                |
|------|---|----------------|----------------|----------------|
| H277 | H | 0.241171373079 | 0.195953673788 | 0.519035598619 |
| H278 | H | 0.758828626921 | 0.695953673788 | 0.480964401381 |
| H279 | H | 0.256067669008 | 0.292798454802 | 0.519275152980 |
| H280 | H | 0.743932330992 | 0.792798454802 | 0.480724847020 |
| H281 | H | 0.349269577070 | 0.168567081586 | 0.533216993548 |
| H282 | H | 0.650730422930 | 0.668567081586 | 0.466783006452 |
| H283 | H | 0.355121364819 | 0.241314797434 | 0.503059238479 |
| H284 | H | 0.644878635181 | 0.741314797434 | 0.496940761521 |
| H285 | H | 0.407188314630 | 0.256528314927 | 0.565987147810 |
| H286 | H | 0.592811685370 | 0.756528314927 | 0.434012852190 |
| H287 | H | 0.372758997129 | 0.334929843090 | 0.545790204928 |
| H288 | H | 0.627241002871 | 0.834929843090 | 0.454209795072 |
| H289 | H | 0.306168127555 | 0.191135890639 | 0.623884845136 |
| H290 | H | 0.693831872445 | 0.691135890639 | 0.376115154864 |
| H291 | H | 0.275421211897 | 0.101527533411 | 0.660340572765 |
| H292 | H | 0.724578788103 | 0.601527533411 | 0.339659427234 |
| H293 | H | 0.210560921405 | 0.079687332157 | 0.634562094216 |
| H294 | H | 0.789439078595 | 0.579687332157 | 0.365437905784 |
| H295 | H | 0.345323221114 | 0.072258395885 | 0.590022083127 |
| H296 | H | 0.654676778886 | 0.572258395885 | 0.409977916873 |
| H297 | H | 0.338302795009 | 0.920671973104 | 0.573398662093 |
| H298 | H | 0.661697204991 | 0.420671973104 | 0.426601337907 |
| H299 | H | 0.455593950893 | 0.009954032995 | 0.585683643783 |
| H300 | H | 0.544406049107 | 0.509954032995 | 0.414316356217 |
| H301 | H | 0.429063079573 | 0.083609692107 | 0.549456612927 |
| H302 | H | 0.570936920427 | 0.583609692107 | 0.450543387073 |
| H303 | H | 0.476097055265 | 0.880700388383 | 0.569889348589 |
| H304 | H | 0.523902944735 | 0.380700388383 | 0.430110651411 |
| H305 | H | 0.493497125596 | 0.938673334635 | 0.534855319089 |
| H306 | H | 0.506502874404 | 0.438673334635 | 0.465144680911 |
| H307 | H | 0.424253315580 | 0.885463459291 | 0.535126303763 |
| H308 | H | 0.575746684420 | 0.385463459291 | 0.464873696237 |
| H309 | H | 0.383507360748 | 0.813332206160 | 0.673709834558 |
| H310 | H | 0.616492639252 | 0.313332206160 | 0.326290165441 |
| H311 | H | 0.443860347304 | 0.703537428152 | 0.625050750963 |
| H312 | H | 0.556139652696 | 0.203537428152 | 0.374949249037 |
| H313 | H | 0.402873637091 | 0.682661986915 | 0.663101112137 |
| H314 | H | 0.597126362909 | 0.182661986915 | 0.336898887863 |
| H315 | H | 0.340362232041 | 0.671150097943 | 0.604282370004 |
| H316 | H | 0.659637767959 | 0.171150097943 | 0.395717629996 |
| H317 | H | 0.305925015368 | 0.718673233602 | 0.638553484022 |
| H318 | H | 0.694074984632 | 0.218673233602 | 0.361446515978 |
| H319 | H | 0.363473756055 | 0.788457696679 | 0.576522302111 |
| H320 | H | 0.636526243945 | 0.288457696679 | 0.423477697889 |
| H321 | H | 0.298497787703 | 0.817976942267 | 0.600529925142 |
| H322 | H | 0.701502212297 | 0.317976942267 | 0.399470074858 |
| H323 | H | 0.460583199654 | 0.813366021460 | 0.708385040291 |
| H324 | H | 0.539416800347 | 0.313366021460 | 0.291614959709 |
| H325 | H | 0.575235796062 | 0.888269789338 | 0.690638345669 |
| H326 | H | 0.424764203938 | 0.388269789338 | 0.309361654331 |
| H327 | H | 0.546396755501 | 0.779053624712 | 0.747921307848 |
| H328 | H | 0.453603244499 | 0.279053624712 | 0.252078692152 |
| H329 | H | 0.614500666548 | 0.831036748089 | 0.743103526103 |
| H330 | H | 0.385499333453 | 0.331036748089 | 0.256896473897 |
| H331 | H | 0.544915686295 | 0.950907853642 | 0.743882476610 |
| H332 | H | 0.455084313705 | 0.450907853642 | 0.256117523390 |
| H333 | H | 0.484603501887 | 0.890780363028 | 0.756916260083 |
| H334 | H | 0.515396498113 | 0.390780363028 | 0.243083739917 |
| H335 | H | 0.537328645985 | 0.690214338687 | 0.693302926568 |
| H336 | H | 0.462671354015 | 0.190214338687 | 0.306697073432 |
| H337 | H | 0.657243693068 | 0.644284085512 | 0.678679072637 |
| H338 | H | 0.342756306932 | 0.144284085512 | 0.321320927363 |
| H339 | H | 0.570841095845 | 0.555390824958 | 0.691127507659 |

|      |   |                |                |                |
|------|---|----------------|----------------|----------------|
| H340 | H | 0.429158904155 | 0.055390824958 | 0.308872492341 |
| H341 | H | 0.612166022549 | 0.529486227072 | 0.654293222424 |
| H342 | H | 0.387833977451 | 0.029486227072 | 0.345706777576 |
| H343 | H | 0.538824808823 | 0.572992495145 | 0.651002048579 |
| H344 | H | 0.461175191177 | 0.072992495145 | 0.348997951421 |
| H345 | H | 0.550199285351 | 0.717374665136 | 0.619758687068 |
| H346 | H | 0.449800714649 | 0.217374665136 | 0.380241312932 |
| H347 | H | 0.629490958111 | 0.679883690137 | 0.561551659165 |
| H348 | H | 0.370509041890 | 0.179883690137 | 0.438448340835 |
| H349 | H | 0.512269595515 | 0.772228162838 | 0.572395208511 |
| H350 | H | 0.487730404485 | 0.272228162838 | 0.427604791488 |
| H351 | H | 0.552651591483 | 0.776186227794 | 0.534098924346 |
| H352 | H | 0.447348408517 | 0.276186227794 | 0.465901075654 |
| H353 | H | 0.506639369512 | 0.629393359038 | 0.564101079515 |
| H354 | H | 0.493360630488 | 0.129393359038 | 0.435898920485 |
| H355 | H | 0.415070934071 | 0.707104392844 | 0.556499414153 |
| H356 | H | 0.584929065929 | 0.207104392844 | 0.443500585847 |
| H357 | H | 0.416564114736 | 0.639410935605 | 0.524054126218 |
| H358 | H | 0.583435885264 | 0.139410935605 | 0.475945873782 |
| H359 | H | 0.438496383230 | 0.733641875856 | 0.515495645789 |
| H360 | H | 0.561503616770 | 0.233641875856 | 0.484504354211 |
| H361 | H | 0.516224129793 | 0.579419689698 | 0.506545705961 |
| H362 | H | 0.483775870207 | 0.079419689698 | 0.493454294039 |
| H363 | H | 0.587881008314 | 0.616052713146 | 0.519323854633 |
| H364 | H | 0.412118991686 | 0.116052713146 | 0.480676145367 |
| H365 | H | 0.540485275084 | 0.667955237011 | 0.491456333287 |
| H366 | H | 0.459514724916 | 0.167955237011 | 0.508543666713 |
| H367 | H | 0.595750155285 | 0.838333676624 | 0.614427246726 |
| H368 | H | 0.404249844715 | 0.338333676624 | 0.385572753274 |
| H369 | H | 0.679855185907 | 0.930791707783 | 0.575628565240 |
| H370 | H | 0.320144814093 | 0.430791707783 | 0.424371434760 |
| H371 | H | 0.633438122020 | 0.948238176913 | 0.648099215603 |
| H372 | H | 0.366561877980 | 0.448238176913 | 0.351900784397 |
| H373 | H | 0.676719830749 | 0.015891762270 | 0.625548774268 |
| H374 | H | 0.323280169251 | 0.515891762270 | 0.374451225731 |
| H375 | H | 0.706573940345 | 0.799662541700 | 0.639889300456 |
| H376 | H | 0.293426059655 | 0.299662541700 | 0.360110699544 |
| H377 | H | 0.835154553765 | 0.836685484830 | 0.648263982694 |
| H378 | H | 0.164845446235 | 0.336685484830 | 0.351736017306 |
| H379 | H | 0.782621032198 | 0.759521292063 | 0.690341092138 |
| H380 | H | 0.217378967802 | 0.259521292063 | 0.309658907862 |
| H381 | H | 0.837736247348 | 0.701051053252 | 0.670098976696 |
| H382 | H | 0.162263752652 | 0.201051053252 | 0.329901023304 |
| H383 | H | 0.758369487690 | 0.694388910603 | 0.659310547223 |
| H384 | H | 0.241630512310 | 0.194388910603 | 0.340689452777 |
| H385 | H | 0.763424343524 | 0.700165428324 | 0.591700421172 |
| H386 | H | 0.236575656476 | 0.200165428324 | 0.408299578828 |
| H387 | H | 0.887028264096 | 0.668664492555 | 0.564903366655 |
| H388 | H | 0.112971735904 | 0.168664492555 | 0.435096633345 |
| H389 | H | 0.834912343053 | 0.607625338668 | 0.518356825004 |
| H390 | H | 0.165087656947 | 0.107625338668 | 0.481643174996 |
| H391 | H | 0.732414042733 | 0.605841782331 | 0.516055810059 |
| H392 | H | 0.267585957267 | 0.105841782331 | 0.483944189941 |
| H393 | H | 0.858141842719 | 0.528541146934 | 0.567013969404 |
| H394 | H | 0.141858157281 | 0.028541146934 | 0.432986030595 |
| H395 | H | 0.786318257034 | 0.502584843524 | 0.550365561889 |
| H396 | H | 0.213681742966 | 0.002584843524 | 0.449634438111 |
| H397 | H | 0.788193886064 | 0.556929934765 | 0.587644782296 |
| H398 | H | 0.211806113936 | 0.056929934765 | 0.412355217704 |
| H399 | H | 0.772959212941 | 0.805537388227 | 0.545535564791 |
| H400 | H | 0.227040787059 | 0.305537388227 | 0.454464435209 |
| H401 | H | 0.834602392138 | 0.853561764481 | 0.485453391229 |
| H402 | H | 0.165397607862 | 0.353561764481 | 0.514546608771 |

|      |   |                |                |                |
|------|---|----------------|----------------|----------------|
| H403 | H | 0.726455264663 | 0.887762005884 | 0.507553674132 |
| H404 | H | 0.273544735337 | 0.387762005884 | 0.492446325868 |
| H405 | H | 0.761308466018 | 0.950061835018 | 0.535560150879 |
| H406 | H | 0.238691533982 | 0.450061835018 | 0.464439849121 |
| H407 | H | 0.746815127640 | 0.906747643272 | 0.443460453562 |
| H408 | H | 0.253184872361 | 0.406747643272 | 0.556539546438 |
| H409 | H | 0.788526030689 | 0.075572870036 | 0.516809811695 |
| H410 | H | 0.211473969311 | 0.575572870036 | 0.483190188305 |
| H411 | H | 0.747963017271 | 0.002418384071 | 0.398990555841 |
| H412 | H | 0.252036982729 | 0.502418384071 | 0.601009444159 |
| H413 | H | 0.789977148695 | 0.171994859500 | 0.471878183556 |
| H414 | H | 0.210022851306 | 0.671994859500 | 0.528121816444 |
| H415 | H | 0.761246643335 | 0.126115260454 | 0.386217723300 |
| H416 | H | 0.238753356665 | 0.626115260454 | 0.613782276700 |
| H417 | H | 0.846951011004 | 0.923477173540 | 0.569439803133 |
| H418 | H | 0.153048988996 | 0.423477173540 | 0.430560196867 |
| H419 | H | 0.939502068581 | 0.030510135101 | 0.545535046141 |
| H420 | H | 0.060497931419 | 0.530510135101 | 0.454464953858 |
| H421 | H | 0.930147948638 | 0.086756589863 | 0.601761529639 |
| H422 | H | 0.069852051362 | 0.586756589863 | 0.398238470361 |
| H423 | H | 0.844078610569 | 0.973848897610 | 0.619391689681 |
| H424 | H | 0.155921389431 | 0.473848897610 | 0.380608310319 |
| H425 | H | 0.852454055827 | 0.119395703959 | 0.558024400164 |
| H426 | H | 0.147545944173 | 0.619395703959 | 0.441975599836 |
| H427 | H | 0.826039245534 | 0.130666946753 | 0.599652741404 |
| H428 | H | 0.173960754466 | 0.630666946753 | 0.400347258596 |
| H429 | H | 0.800497913450 | 0.052312958195 | 0.575685324874 |
| H430 | H | 0.199502086551 | 0.552312958195 | 0.424314675126 |
| H431 | H | 0.946233517477 | 0.862223799675 | 0.589197153692 |
| H432 | H | 0.053766482523 | 0.362223799675 | 0.410802846308 |
| H433 | H | 0.038017849827 | 0.803898485987 | 0.608229179661 |
| H434 | H | 0.961982150173 | 0.303898485987 | 0.391770820339 |
| H435 | H | 0.075675580947 | 0.892311455507 | 0.609949554130 |
| H436 | H | 0.924324419054 | 0.392311455507 | 0.390050445870 |
| H437 | H | 0.942044772216 | 0.930959241731 | 0.645519785340 |
| H438 | H | 0.057955227784 | 0.430959241731 | 0.354480214660 |
| H439 | H | 0.984658118857 | 0.911591721264 | 0.714686611028 |
| H440 | H | 0.015341881143 | 0.411591721264 | 0.285313388971 |
| H441 | H | 0.855648610496 | 0.944252297465 | 0.686644029994 |
| H442 | H | 0.144351389504 | 0.444252297465 | 0.313355970006 |
| H443 | H | 0.877993395507 | 0.951225975739 | 0.729264578727 |
| H444 | H | 0.122006604493 | 0.451225975739 | 0.270735421273 |
| H445 | H | 0.918042376907 | 0.844000868000 | 0.754959855418 |
| H446 | H | 0.081957623093 | 0.344000868000 | 0.245040144582 |
| H447 | H | 0.880873958717 | 0.696055225439 | 0.726904089258 |
| H448 | H | 0.119126041283 | 0.196055225439 | 0.273095910742 |
| H449 | H | 0.941935085709 | 0.630854637928 | 0.767351235334 |
| H450 | H | 0.058064914291 | 0.130854637928 | 0.232648764666 |
| H451 | H | 0.995833495626 | 0.780987130296 | 0.790111488543 |
| H452 | H | 0.004166504374 | 0.280987130296 | 0.209888511457 |
| H453 | H | 0.943223982139 | 0.726620280280 | 0.813305671018 |
| H454 | H | 0.056776017861 | 0.226620280280 | 0.186694328982 |
| H455 | H | 0.047676015613 | 0.664473644298 | 0.743477947010 |
| H456 | H | 0.952323984387 | 0.164473644298 | 0.256522052990 |
| H457 | H | 0.014769446281 | 0.743233344660 | 0.724634228446 |
| H458 | H | 0.985230553719 | 0.243233344660 | 0.275365771553 |
| H459 | H | 0.989093614880 | 0.652430030709 | 0.713057444701 |
| H460 | H | 0.010906385120 | 0.152430030709 | 0.286942555299 |
| H461 | H | 0.021027394232 | 0.619924432864 | 0.814732096248 |
| H462 | H | 0.978972605768 | 0.119924432864 | 0.185267903752 |
| H463 | H | 0.045810470588 | 0.702892729558 | 0.835570396408 |
| H464 | H | 0.954189529412 | 0.202892729558 | 0.164429603592 |
| H465 | H | 0.076031136532 | 0.680935233310 | 0.795571291243 |



|      |   |                |                |                |
|------|---|----------------|----------------|----------------|
| H466 | H | 0.923968863468 | 0.180935233310 | 0.204428708757 |
| H467 | H | 0.813017737131 | 0.629261408293 | 0.758476251709 |
| H468 | H | 0.186982262869 | 0.129261408293 | 0.241523748291 |
| H469 | H | 0.763780445609 | 0.706374108838 | 0.818921324833 |
| H470 | H | 0.236219554391 | 0.206374108838 | 0.181078675167 |
| H471 | H | 0.721816698897 | 0.562380800263 | 0.784430726881 |
| H472 | H | 0.278183301103 | 0.062380800263 | 0.215569273118 |
| H473 | H | 0.648570972577 | 0.707128916782 | 0.781599177401 |
| H474 | H | 0.351429027423 | 0.207128916782 | 0.218400822599 |
| H475 | H | 0.707444743639 | 0.689641352236 | 0.751950789754 |
| H476 | H | 0.292555256361 | 0.189641352236 | 0.248049210246 |
| H477 | H | 0.689143188863 | 0.563483956379 | 0.844745874876 |
| H478 | H | 0.310856811137 | 0.063483956379 | 0.155254125124 |
| H479 | H | 0.624140519936 | 0.580904445823 | 0.818901170102 |
| H480 | H | 0.375859480064 | 0.080904445823 | 0.181098829898 |
| H481 | H | 0.660559770999 | 0.655651345719 | 0.840214401983 |
| H482 | H | 0.339440229001 | 0.155651345719 | 0.159785598017 |
| H483 | H | 0.658340025020 | 0.573203601800 | 0.733151902033 |
| H484 | H | 0.341659974980 | 0.073203601800 | 0.266848097967 |
| H485 | H | 0.601919374727 | 0.645583432801 | 0.732971266144 |
| H486 | H | 0.398080625273 | 0.145583432801 | 0.267028733855 |
| H487 | H | 0.601161163814 | 0.578656073738 | 0.765049612189 |
| H488 | H | 0.398838836186 | 0.078656073738 | 0.234950387810 |
| H489 | H | 0.780440135103 | 0.664252501593 | 0.869052503632 |
| H490 | H | 0.219559864897 | 0.164252501593 | 0.130947496368 |
| H491 | H | 0.827078360540 | 0.508985048901 | 0.875789579717 |
| H492 | H | 0.172921639460 | 0.008985048901 | 0.124210420283 |
| H493 | H | 0.882387098668 | 0.542609191743 | 0.927359268794 |
| H494 | H | 0.117612901332 | 0.042609191743 | 0.072640731206 |
| H495 | H | 0.866952022139 | 0.706742379478 | 0.906246968040 |
| H496 | H | 0.133047977861 | 0.206742379478 | 0.093753031960 |
| H497 | H | 0.825452794571 | 0.663123988605 | 0.938933019360 |
| H498 | H | 0.174547205429 | 0.163123988605 | 0.061066980640 |
| H499 | H | 0.975169067703 | 0.594567669759 | 0.897794095979 |
| H500 | H | 0.024830932297 | 0.094567669758 | 0.102205904021 |
| H501 | H | 0.928600246823 | 0.621202260774 | 0.863318411904 |
| H502 | H | 0.071399753177 | 0.121202260774 | 0.136681588096 |
| H503 | H | 0.937993265846 | 0.525039823637 | 0.873558204783 |
| H504 | H | 0.062006734154 | 0.025039823637 | 0.126441795216 |
| H505 | H | 0.924099940631 | 0.637352687835 | 0.970197054105 |
| H506 | H | 0.075900059369 | 0.137352687835 | 0.029802945895 |
| H507 | H | 0.912585483425 | 0.734442369292 | 0.962594142496 |
| H508 | H | 0.087414516575 | 0.234442369292 | 0.037405857504 |
| H509 | H | 0.966330911381 | 0.683597718266 | 0.938319160330 |
| H510 | H | 0.033669088619 | 0.183597718266 | 0.061680839670 |
| H511 | H | 0.663744990369 | 0.506291546043 | 0.944845330330 |
| H512 | H | 0.336255009631 | 0.006291546043 | 0.055154669670 |
| H513 | H | 0.683602606968 | 0.375986139972 | 0.980890446080 |
| H514 | H | 0.316397393032 | 0.875986139972 | 0.019109553920 |
| H515 | H | 0.661080659336 | 0.374996789879 | 0.938011513714 |
| H516 | H | 0.338919340664 | 0.874996789879 | 0.061988486286 |
| H517 | H | 0.791475398778 | 0.359456446006 | 0.966425000972 |
| H518 | H | 0.208524601222 | 0.859456446006 | 0.033574999028 |
| H519 | H | 0.756999070453 | 0.303159746241 | 0.934970138446 |
| H520 | H | 0.243000929547 | 0.803159746241 | 0.065029861554 |
| H521 | H | 0.833974067299 | 0.420297085659 | 0.919008649458 |
| H522 | H | 0.166025932701 | 0.920297085659 | 0.080991350542 |
| H523 | H | 0.769484712939 | 0.398955825891 | 0.892605701229 |
| H524 | H | 0.230515287061 | 0.898955825891 | 0.107394298771 |
| H525 | H | 0.815641415711 | 0.514191159121 | 0.976546523133 |
| H526 | H | 0.184358584290 | 0.014191159121 | 0.023453476867 |
| H527 | H | 0.771305880289 | 0.562733269800 | 0.042575490163 |
| H528 | H | 0.228694119711 | 0.062733269800 | 0.957424509837 |

|      |   |                |                |                |
|------|---|----------------|----------------|----------------|
| H529 | H | 0.848239094495 | 0.564416243001 | 0.026773667230 |
| H530 | H | 0.151760905505 | 0.064416243001 | 0.973226332770 |
| H531 | H | 0.836651919940 | 0.688682731406 | 0.057769013014 |
| H532 | H | 0.163348080060 | 0.188682731406 | 0.942230986986 |
| H533 | H | 0.810065579497 | 0.802435872328 | 0.006048990577 |
| H534 | H | 0.189934420503 | 0.302435872328 | 0.993951009423 |
| H535 | H | 0.721538746321 | 0.803929070608 | 0.045145627622 |
| H536 | H | 0.278461253679 | 0.303929070608 | 0.954854372378 |
| H537 | H | 0.767451317686 | 0.885708023929 | 0.050894134201 |
| H538 | H | 0.232548682314 | 0.385708023929 | 0.949105865799 |
| H539 | H | 0.772505875701 | 0.811065675809 | 0.080391264398 |
| H540 | H | 0.227494124299 | 0.311065675809 | 0.919608735602 |
| H541 | H | 0.921444081580 | 0.722136396124 | 0.029516072908 |
| H542 | H | 0.078555918420 | 0.222136396124 | 0.970483927092 |
| H543 | H | 0.992209391110 | 0.859096515546 | 0.046635837006 |
| H544 | H | 0.007790608890 | 0.359096515546 | 0.953364162994 |
| H545 | H | 0.019566446640 | 0.700103412139 | 0.070952169395 |
| H546 | H | 0.980433553360 | 0.200103412139 | 0.929047830605 |
| H547 | H | 0.941686602166 | 0.758351645378 | 0.098973007193 |
| H548 | H | 0.058313397834 | 0.258351645378 | 0.901026992807 |
| H549 | H | 0.116368990259 | 0.768394839153 | 0.060590517154 |
| H550 | H | 0.883631009741 | 0.268394839153 | 0.939409482846 |
| H551 | H | 0.101314568532 | 0.759374748632 | 0.104226600078 |
| H552 | H | 0.898685431468 | 0.259374748632 | 0.895773399922 |
| H553 | H | 0.088096207239 | 0.847289003046 | 0.083256386958 |
| H554 | H | 0.911903792761 | 0.347289003046 | 0.916743613042 |
| H555 | H | 0.014162731797 | 0.890611062414 | 0.996802624902 |
| H556 | H | 0.985837268203 | 0.390611062414 | 0.003197375098 |
| H557 | H | 0.045289561741 | 0.787849778469 | 0.943318481839 |
| H558 | H | 0.954710438259 | 0.287849778469 | 0.056681518161 |
| H559 | H | 0.060649144837 | 0.958051856503 | 0.952420523484 |
| H560 | H | 0.939350855163 | 0.458051856503 | 0.047579476516 |
| H561 | H | 0.074823759029 | 0.911599019396 | 0.914119931326 |
| H562 | H | 0.925176240971 | 0.411599019396 | 0.085880068674 |
| H563 | H | 0.244160343362 | 0.770829816291 | 0.967946238791 |
| H564 | H | 0.755839656638 | 0.270829816291 | 0.032053761209 |
| H565 | H | 0.291478146859 | 0.717154760051 | 0.907843222391 |
| H566 | H | 0.708521853141 | 0.217154760051 | 0.092156777609 |
| H567 | H | 0.239047047909 | 0.662770748588 | 0.931839101522 |
| H568 | H | 0.760952952091 | 0.162770748588 | 0.068160898478 |
| H569 | H | 0.209039116198 | 0.768657918067 | 0.873554591984 |
| H570 | H | 0.790960883802 | 0.268657918067 | 0.126445408016 |
| H571 | H | 0.187786596978 | 0.672602829130 | 0.876920692582 |
| H572 | H | 0.812213403022 | 0.172602829130 | 0.123079307418 |
| H573 | H | 0.106880416108 | 0.782679883082 | 0.896079752591 |
| H574 | H | 0.893119583893 | 0.282679883082 | 0.103920247409 |
| H575 | H | 0.112174536253 | 0.697849328826 | 0.919518550386 |
| H576 | H | 0.887825463747 | 0.197849328826 | 0.080481449614 |
| H577 | H | 0.340316617457 | 0.820834014719 | 0.953089864084 |
| H578 | H | 0.659683382544 | 0.320834014719 | 0.046910135916 |
| H579 | H | 0.335807932551 | 0.978411769749 | 0.940121442235 |
| H580 | H | 0.664192067450 | 0.478411769749 | 0.059878557765 |
| H581 | H | 0.402257162975 | 0.922378083544 | 0.941328505004 |
| H582 | H | 0.597742837025 | 0.422378083544 | 0.058671494996 |
| H583 | H | 0.343812289184 | 0.831493898585 | 0.879999325095 |
| H584 | H | 0.656187710816 | 0.331493898585 | 0.120000674905 |
| H585 | H | 0.384918417955 | 0.940163685433 | 0.829195825098 |
| H586 | H | 0.615081582045 | 0.440163685433 | 0.170804174902 |
| H587 | H | 0.392910136770 | 0.829037828470 | 0.791246939191 |
| H588 | H | 0.607089863230 | 0.329037828470 | 0.208753060809 |
| H589 | H | 0.441574592719 | 0.826650784672 | 0.826099904846 |
| H590 | H | 0.558425407281 | 0.326650784672 | 0.173900095154 |
| H591 | H | 0.253139035471 | 0.899729038322 | 0.865047407538 |

|      |   |                |                |                |
|------|---|----------------|----------------|----------------|
| H592 | H | 0.746860964529 | 0.399729038322 | 0.134952592462 |
| H593 | H | 0.191231471071 | 0.961400916959 | 0.805657608114 |
| H594 | H | 0.808768528929 | 0.461400916959 | 0.194342391886 |
| H595 | H | 0.134838936527 | 0.837215216432 | 0.848577236145 |
| H596 | H | 0.865161063473 | 0.337215216432 | 0.151422763855 |
| H597 | H | 0.094328300829 | 0.894973302797 | 0.820332724121 |
| H598 | H | 0.905671699171 | 0.394973302797 | 0.179667275879 |
| H599 | H | 0.231700539233 | 0.761814490013 | 0.820174819051 |
| H600 | H | 0.768299460767 | 0.261814490013 | 0.179825180949 |
| H601 | H | 0.084829982875 | 0.864168243291 | 0.763894146023 |
| H602 | H | 0.915170017125 | 0.364168243291 | 0.236105853977 |
| H603 | H | 0.261950619422 | 0.690089073860 | 0.770591107195 |
| H604 | H | 0.738049380579 | 0.190089073860 | 0.229408892805 |
| H605 | H | 0.113893818925 | 0.789818125893 | 0.714326510041 |
| H606 | H | 0.886106181075 | 0.289818125893 | 0.285673489959 |
| H607 | H | 0.183022320536 | 0.699952798601 | 0.692705156918 |
| H608 | H | 0.816977679464 | 0.199952798601 | 0.307294843082 |
| H609 | H | 0.236543727398 | 0.056927660422 | 0.840824944707 |
| H610 | H | 0.763456272602 | 0.556927660422 | 0.159175055293 |
| H611 | H | 0.179871891568 | 0.073925400021 | 0.907600518422 |
| H612 | H | 0.820128108432 | 0.573925400021 | 0.092399481578 |
| H613 | H | 0.294145011253 | 0.092005493390 | 0.897384576973 |
| H614 | H | 0.705854988747 | 0.592005493390 | 0.102615423027 |
| H615 | H | 0.259570114062 | 0.175227203402 | 0.913807553083 |
| H616 | H | 0.740429885938 | 0.675227203402 | 0.086192446917 |
| H617 | H | 0.277716483126 | 0.168302634092 | 0.870313503802 |
| H618 | H | 0.722283516874 | 0.668302634092 | 0.129686496198 |
| H619 | H | 0.139421347784 | 0.130766928382 | 0.829634123597 |
| H620 | H | 0.860578652216 | 0.630766928382 | 0.170365876403 |
| H621 | H | 0.093402867125 | 0.275795891903 | 0.855726088187 |
| H622 | H | 0.906597132875 | 0.775795891903 | 0.144273911813 |
| H623 | H | 0.117138758885 | 0.231778246960 | 0.782695604116 |
| H624 | H | 0.882861241115 | 0.731778246960 | 0.217304395884 |
| H625 | H | 0.100300771735 | 0.322362235716 | 0.798644935148 |
| H626 | H | 0.899699228265 | 0.822362235716 | 0.201355064851 |
| H627 | H | 0.177985588113 | 0.360519554988 | 0.847327712300 |
| H628 | H | 0.822014411887 | 0.860519554988 | 0.152672287700 |
| H629 | H | 0.254306911562 | 0.337310676816 | 0.837020220869 |
| H630 | H | 0.745693088438 | 0.837310676816 | 0.162979779131 |
| H631 | H | 0.692217347540 | 0.034641708766 | 0.866572092650 |
| H632 | H | 0.307782652460 | 0.534641708766 | 0.133427907350 |
| H633 | H | 0.748286988652 | 0.026311274434 | 0.888666312534 |
| H634 | H | 0.251713011348 | 0.526311274434 | 0.111333687466 |
| H635 | H | 0.266283114802 | 0.149660292794 | 0.803484128728 |
| H636 | H | 0.733716885198 | 0.649660292794 | 0.196515871272 |
| H637 | H | 0.298055901929 | 0.083903726946 | 0.786453582932 |
| H638 | H | 0.701944098071 | 0.583903726946 | 0.213546417068 |
| H639 | H | 0.430958954321 | 0.034431089016 | 0.847348922418 |
| H640 | H | 0.569041045679 | 0.534431089016 | 0.152651077582 |
| H641 | H | 0.492444668717 | 0.007906142569 | 0.830186451821 |
| H642 | H | 0.507555331283 | 0.507906142569 | 0.169813548179 |
| H643 | H | 0.316675786093 | 0.345617682874 | 0.728774710097 |
| H644 | H | 0.683324213907 | 0.845617682874 | 0.271225289903 |
| H645 | H | 0.313407201490 | 0.434307039983 | 0.735672326944 |
| H646 | H | 0.686592798510 | 0.934307039983 | 0.264327673056 |
| H647 | H | 0.248911773417 | 0.409004261949 | 0.651338521626 |
| H648 | H | 0.751088226584 | 0.909004261949 | 0.348661478374 |
| H649 | H | 0.260639843844 | 0.426967784239 | 0.689140541910 |
| H650 | H | 0.739360156156 | 0.926967784239 | 0.310859458090 |
| H651 | H | 0.245366691711 | 0.540246891154 | 0.658792131545 |
| H652 | H | 0.754633308289 | 0.040246891154 | 0.341207868455 |
| H653 | H | 0.283884440375 | 0.610553940104 | 0.668674412875 |
| H654 | H | 0.716115559625 | 0.110553940104 | 0.331325587125 |

|      |   |                |                |                |
|------|---|----------------|----------------|----------------|
| H655 | H | 0.335039783154 | 0.602532491248 | 0.719040771234 |
| H656 | H | 0.664960216846 | 0.102532491248 | 0.280959228766 |
| H657 | H | 0.291139197010 | 0.668591107565 | 0.710335498684 |
| H658 | H | 0.708860802990 | 0.168591107565 | 0.289664501316 |
| H659 | H | 0.392620610655 | 0.510694770318 | 0.739682193354 |
| H660 | H | 0.607379389345 | 0.010694770318 | 0.260317806646 |
| H661 | H | 0.350460446097 | 0.528475124777 | 0.769735527461 |
| H662 | H | 0.649539553903 | 0.028475124777 | 0.230264472539 |
| H663 | H | 0.683946331011 | 0.290752058229 | 0.790891503926 |
| H664 | H | 0.316053668989 | 0.790752058229 | 0.209108496074 |
| H665 | H | 0.716174821269 | 0.312751585122 | 0.823615507189 |
| H666 | H | 0.283825178732 | 0.812751585122 | 0.176384492811 |
| H667 | H | 0.930829952479 | 0.502917266845 | 0.755414687305 |
| H668 | H | 0.069170047521 | 0.002917266845 | 0.244585312695 |
| H669 | H | 0.937189564756 | 0.520524994074 | 0.716594959758 |
| H670 | H | 0.062810435244 | 0.020524994074 | 0.283405040242 |
| H671 | H | 0.778832014088 | 0.563787050505 | 0.702434494842 |
| H672 | H | 0.221167985912 | 0.063787050505 | 0.297565505158 |
| H673 | H | 0.834746008061 | 0.539551602673 | 0.726424566805 |
| H674 | H | 0.165253991939 | 0.039551602673 | 0.273575433195 |
| H675 | H | 0.747799211735 | 0.507175062975 | 0.648661819111 |
| H676 | H | 0.252200788266 | 0.007175062975 | 0.351338180889 |
| H677 | H | 0.725981935652 | 0.590373320927 | 0.645772709663 |
| H678 | H | 0.274018064348 | 0.090373320927 | 0.354227290337 |
| H679 | H | 0.041509653345 | 0.190398702212 | 0.562328854586 |
| H680 | H | 0.958490346655 | 0.690398702212 | 0.437671145414 |
| H681 | H | 0.012895483381 | 0.112614956815 | 0.568473067223 |
| H682 | H | 0.987104516619 | 0.612614956815 | 0.431526932777 |
| H683 | H | 0.545535581964 | 0.212519126210 | 0.759985090916 |
| H684 | H | 0.454464418036 | 0.712519126210 | 0.240014909084 |
| H685 | H | 0.590491203992 | 0.277817795988 | 0.750345021125 |
| H686 | H | 0.409508796008 | 0.777817795988 | 0.249654978875 |
| H687 | H | 0.497990539845 | 0.326910438948 | 0.727898274303 |
| H688 | H | 0.502009460155 | 0.826910438948 | 0.272101725697 |
| H689 | H | 0.504502216024 | 0.367960903945 | 0.693478917206 |
| H690 | H | 0.495497783976 | 0.867960903945 | 0.306521082794 |
| H691 | H | 0.472395019598 | 0.491309452167 | 0.767564860329 |
| H692 | H | 0.527604980402 | 0.991309452167 | 0.232435139671 |
| H693 | H | 0.480558134686 | 0.449060970027 | 0.732865612511 |
| H694 | H | 0.519441865314 | 0.949060970027 | 0.267134387489 |
| H695 | H | 0.329747018135 | 0.206420074737 | 0.733736050445 |
| H696 | H | 0.670252981865 | 0.706420074737 | 0.266263949555 |
| H697 | H | 0.359567078633 | 0.242543637466 | 0.702875061463 |
| H698 | H | 0.640432921367 | 0.742543637466 | 0.297124938537 |
| H699 | H | 0.140874898298 | 0.190035934762 | 0.557389085319 |
| H700 | H | 0.859125101702 | 0.690035934762 | 0.442610914681 |
| H701 | H | 0.110098612758 | 0.243653090041 | 0.532016244570 |
| H702 | H | 0.889901387242 | 0.743653090041 | 0.467983755430 |
| H703 | H | 0.101675185689 | 0.009202058245 | 0.602631576275 |
| H704 | H | 0.898324814311 | 0.509202058245 | 0.397368423725 |
| H705 | H | 0.165466635804 | 0.035247603338 | 0.591165882807 |
| H706 | H | 0.834533364196 | 0.535247603338 | 0.408834117193 |
| H707 | H | 0.255874222131 | 0.869814933274 | 0.655764238760 |
| H708 | H | 0.744125777869 | 0.369814933274 | 0.344235761240 |
| H709 | H | 0.214776870786 | 0.797840150583 | 0.660902007322 |
| H710 | H | 0.785223129214 | 0.297840150583 | 0.339097992678 |
| H711 | H | 0.256791380171 | 0.059929299635 | 0.537358127283 |
| H712 | H | 0.743208619829 | 0.559929299635 | 0.462641872717 |
| H713 | H | 0.325042295543 | 0.044208088389 | 0.527740684484 |
| H714 | H | 0.674957704458 | 0.544208088389 | 0.472259315516 |
| H715 | H | 0.372924840663 | 0.787966774762 | 0.734532559744 |
| H716 | H | 0.627075159337 | 0.287966774762 | 0.265467440256 |
| H717 | H | 0.423901698920 | 0.724490310605 | 0.736887877057 |

|      |   |                |                |                |
|------|---|----------------|----------------|----------------|
| H718 | H | 0.576098301080 | 0.224490310605 | 0.263112122943 |
| H719 | H | 0.284795551710 | 0.852560509274 | 0.746557138877 |
| H720 | H | 0.715204448290 | 0.352560509274 | 0.253442861123 |
| H721 | H | 0.280553875634 | 0.830166530908 | 0.707401991561 |
| H722 | H | 0.719446124366 | 0.330166530908 | 0.292598008439 |
| H723 | H | 0.482552195123 | 0.598220267578 | 0.733349584459 |
| H724 | H | 0.517447804878 | 0.098220267578 | 0.266650415541 |
| H725 | H | 0.502887540506 | 0.666721143554 | 0.754321388700 |
| H726 | H | 0.497112459494 | 0.166721143554 | 0.245678611300 |
| H727 | H | 0.502991209764 | 0.112292644686 | 0.799818264227 |
| H728 | H | 0.497008790236 | 0.612292644686 | 0.200181735773 |
| H729 | H | 0.554305564578 | 0.064758242900 | 0.785220230266 |
| H730 | H | 0.445694435422 | 0.564758242900 | 0.214779769734 |
| H731 | H | 0.528673782179 | 0.751778432606 | 0.798139768956 |
| H732 | H | 0.471326217821 | 0.251778432606 | 0.201860231044 |
| H733 | H | 0.473990390163 | 0.696786499484 | 0.803697519798 |
| H734 | H | 0.526009609837 | 0.196786499484 | 0.196302480202 |
| H735 | H | 0.559672696836 | 0.714031917594 | 0.845424207642 |
| H736 | H | 0.440327303165 | 0.214031917594 | 0.154575792358 |
| H737 | H | 0.574408590176 | 0.797117664298 | 0.847939379153 |
| H738 | H | 0.425591409824 | 0.297117664298 | 0.152060620847 |
| H739 | H | 0.144916476312 | 0.704884562876 | 0.636588881870 |
| H740 | H | 0.855083523688 | 0.204884562876 | 0.363411118130 |
| H741 | H | 0.109147253348 | 0.765335808993 | 0.658449536198 |
| H742 | H | 0.890852746652 | 0.265335808993 | 0.341550463802 |
| H743 | H | 0.955519590103 | 0.702205375274 | 0.619687713634 |
| H744 | H | 0.044480409897 | 0.202205375274 | 0.380312286365 |
| H745 | H | 0.971030264823 | 0.717068247407 | 0.655865590060 |
| H746 | H | 0.028969735177 | 0.217068247407 | 0.344134409940 |
| H747 | H | 0.910510980641 | 0.516071369235 | 0.809149489383 |
| H748 | H | 0.089489019359 | 0.016071369235 | 0.190850510617 |
| H749 | H | 0.968034141978 | 0.468358200427 | 0.817714305959 |
| H750 | H | 0.031965858022 | 0.968358200427 | 0.182285694041 |
| H751 | H | 0.713280347888 | 0.450404872845 | 0.830716509390 |
| H752 | H | 0.286719652112 | 0.950404872845 | 0.169283490610 |
| H753 | H | 0.782829906750 | 0.456850100205 | 0.824258452885 |
| H754 | H | 0.217170093250 | 0.956850100205 | 0.175741547115 |
| H755 | H | 0.878366118365 | 0.422020722065 | 0.984045208411 |
| H756 | H | 0.121633881635 | 0.922020722065 | 0.015954791589 |
| H757 | H | 0.931960547485 | 0.472839456085 | 0.971101445866 |
| H758 | H | 0.068039452515 | 0.972839456084 | 0.028898554134 |
| H759 | H | 0.049552672516 | 0.485649539751 | 0.979649595522 |
| H760 | H | 0.950447327484 | 0.985649539751 | 0.020350404478 |
| H761 | H | 0.002911549320 | 0.528916506276 | 0.004106760705 |
| H762 | H | 0.997088450680 | 0.028916506276 | 0.995893239295 |
| H763 | H | 0.973887634241 | 0.598313999859 | 0.052638731766 |
| H764 | H | 0.026112365759 | 0.098313999859 | 0.947361268234 |
| H765 | H | 0.006392561036 | 0.640779947123 | 0.022387769486 |
| H766 | H | 0.993607438964 | 0.140779947123 | 0.977612230514 |
| H767 | H | 0.934496626085 | 0.546120445517 | 0.106978588412 |
| H768 | H | 0.065503373915 | 0.046120445517 | 0.893021411588 |
| H769 | H | 0.972882979868 | 0.614825566463 | 0.117751279893 |
| H770 | H | 0.027117020132 | 0.114825566463 | 0.882248720107 |
| H771 | H | 0.118479188112 | 0.550550201191 | 0.098322713435 |
| H772 | H | 0.881520811889 | 0.050550201191 | 0.901677286565 |
| H773 | H | 0.051354973059 | 0.575302593157 | 0.093794910429 |
| H774 | H | 0.948645026941 | 0.075302593157 | 0.906205089571 |
| H775 | H | 0.354388464314 | 0.686569211038 | 0.966555700938 |
| H776 | H | 0.645611535686 | 0.186569211038 | 0.033444299062 |
| H777 | H | 0.353277540915 | 0.724326010870 | 0.001150968688 |
| H778 | H | 0.646722459085 | 0.224326010870 | 0.998849031312 |
| H779 | H | 0.300663774069 | 0.636656101945 | 0.855862585639 |
| H780 | H | 0.699336225932 | 0.136656101945 | 0.144137414361 |

|      |   |                |                |                |
|------|---|----------------|----------------|----------------|
| H781 | H | 0.249167631361 | 0.576990959321 | 0.862042955119 |
| H782 | H | 0.750832368639 | 0.076990959321 | 0.137957044881 |
| H783 | H | 0.382809606879 | 0.598652420165 | 0.809988575473 |
| H784 | H | 0.617190393121 | 0.098652420165 | 0.190011424527 |
| H785 | H | 0.345163292690 | 0.540080548736 | 0.828409626758 |
| H786 | H | 0.654836707310 | 0.040080548736 | 0.171590373242 |
| H787 | H | 0.994093483457 | 0.366051628948 | 0.868521983114 |
| H788 | H | 0.005906516543 | 0.866051628948 | 0.131478016886 |
| H789 | H | 0.000921091875 | 0.349745812853 | 0.831440850918 |
| H790 | H | 0.999078908125 | 0.849745812853 | 0.168559149082 |
| H791 | H | 0.078223819813 | 0.409249621607 | 0.864468159414 |
| H792 | H | 0.921776180187 | 0.909249621607 | 0.135531840586 |
| H793 | H | 0.114887116814 | 0.403230446400 | 0.898387207972 |
| H794 | H | 0.885112883186 | 0.903230446400 | 0.101612792028 |
| H795 | H | 0.137602083213 | 0.572299305165 | 0.841267368901 |
| H796 | H | 0.862397916787 | 0.072299305165 | 0.158732631099 |
| H797 | H | 0.144872388171 | 0.509786933446 | 0.867691740591 |
| H798 | H | 0.855127611829 | 0.009786933446 | 0.132308259409 |
| C1   | C | 0.686001285101 | 0.810401429759 | 0.912889440538 |
| C2   | C | 0.313998714899 | 0.310401429759 | 0.087110559462 |
| C3   | C | 0.723229848918 | 0.815095288748 | 0.880638503843 |
| C4   | C | 0.276770151082 | 0.315095288748 | 0.119361496157 |
| C5   | C | 0.727606244869 | 0.817980302706 | 0.944324252072 |
| C6   | C | 0.272393755131 | 0.317980302706 | 0.055675747928 |
| C7   | C | 0.752899677476 | 0.897029341292 | 0.948733858068 |
| C8   | C | 0.247100322524 | 0.397029341292 | 0.051266141932 |
| C9   | C | 0.769903255926 | 0.895457944756 | 0.838905133836 |
| C10  | C | 0.230096744074 | 0.395457944756 | 0.161094866164 |
| C11  | C | 0.827424540276 | 0.938207648291 | 0.849648330972 |
| C12  | C | 0.172575459724 | 0.438207648291 | 0.150351669028 |
| C13  | C | 0.736734568752 | 0.932444845017 | 0.808602097307 |
| C14  | C | 0.263265431248 | 0.432444845017 | 0.191397902693 |
| C15  | C | 0.701934108444 | 0.872104647972 | 0.789517790255 |
| C16  | C | 0.298065891556 | 0.372104647972 | 0.210482209745 |
| C17  | C | 0.939635129854 | 0.943987583183 | 0.837965506548 |
| C18  | C | 0.060364870146 | 0.443987583183 | 0.162034493452 |
| C19  | C | 0.966072883651 | 0.961300512655 | 0.803053495957 |
| C20  | C | 0.033927116349 | 0.461300512655 | 0.196946504043 |
| C21  | C | 0.981915328352 | 0.884583336815 | 0.854009528190 |
| C22  | C | 0.018084671648 | 0.384583336815 | 0.145990471810 |
| C23  | C | 0.025831050398 | 0.041312959449 | 0.766645964287 |
| C24  | C | 0.974168949602 | 0.541312959449 | 0.233354035712 |
| C25  | C | 0.095887390839 | 0.047793124476 | 0.767507791008 |
| C26  | C | 0.904112609161 | 0.547793124476 | 0.232492208992 |
| C27  | C | 0.996334958230 | 0.113521867686 | 0.753280994472 |
| C28  | C | 0.003665041770 | 0.613521867686 | 0.246719005528 |
| C29  | C | 0.193923083150 | 0.024764904250 | 0.738804497461 |
| C30  | C | 0.806076916851 | 0.524764904250 | 0.261195502539 |
| C31  | C | 0.221139337905 | 0.102097209243 | 0.732190833572 |
| C32  | C | 0.778860662095 | 0.602097209243 | 0.267809166428 |
| C33  | C | 0.208223846377 | 0.969476546767 | 0.710396990919 |
| C34  | C | 0.791776153623 | 0.469476546767 | 0.289603009081 |
| C35  | C | 0.154065253511 | 0.978767578953 | 0.686400227698 |
| C36  | C | 0.845934746489 | 0.478767578953 | 0.313599772302 |
| C37  | C | 0.099112667163 | 0.987785304852 | 0.709905035575 |
| C38  | C | 0.900887332837 | 0.487785304852 | 0.290094964425 |
| C39  | C | 0.200909203519 | 0.232120735658 | 0.717101987437 |
| C40  | C | 0.799090796481 | 0.732120735658 | 0.282898012563 |
| C41  | C | 0.145251302387 | 0.282016993809 | 0.722933557112 |
| C42  | C | 0.854748697613 | 0.782016993809 | 0.277066442887 |
| C43  | C | 0.229800906834 | 0.248553805858 | 0.683053238035 |
| C44  | C | 0.770199093166 | 0.748553805858 | 0.316946761965 |
| C45  | C | 0.114053247212 | 0.411887187487 | 0.733294813646 |

|      |   |                |                |                |
|------|---|----------------|----------------|----------------|
| C46  | C | 0.885946752788 | 0.911887187487 | 0.266705186354 |
| C47  | C | 0.074539046725 | 0.421453871169 | 0.701717126225 |
| C48  | C | 0.925460953275 | 0.921453871169 | 0.298282873775 |
| C49  | C | 0.146143729633 | 0.485195504369 | 0.743748387542 |
| C50  | C | 0.853856270367 | 0.985195504369 | 0.256251612458 |
| C51  | C | 0.178128974250 | 0.476633290155 | 0.777990086333 |
| C52  | C | 0.821871025750 | 0.976633290155 | 0.222009913667 |
| C53  | C | 0.100898679140 | 0.550260587477 | 0.742964992663 |
| C54  | C | 0.899101320860 | 0.050260587477 | 0.257035007337 |
| C55  | C | 0.216167251099 | 0.545129083418 | 0.787448728014 |
| C56  | C | 0.783832748901 | 0.045129083418 | 0.212551271986 |
| C57  | C | 0.067083101925 | 0.432060113264 | 0.641290231217 |
| C58  | C | 0.932916898075 | 0.932060113264 | 0.358709768783 |
| C59  | C | 0.034599611132 | 0.359050977267 | 0.631692736328 |
| C60  | C | 0.965400388868 | 0.859050977267 | 0.368307263672 |
| C61  | C | 0.104657631131 | 0.470100404706 | 0.613061547328 |
| C62  | C | 0.895342368869 | 0.970100404706 | 0.386938452672 |
| C63  | C | 0.079630166470 | 0.454865928644 | 0.577823148312 |
| C64  | C | 0.920369833530 | 0.954865928644 | 0.422176851688 |
| C65  | C | 0.107440114947 | 0.554231416273 | 0.620908935408 |
| C66  | C | 0.892559885053 | 0.054231416273 | 0.379091064592 |
| C67  | C | 0.020964268804 | 0.225610142205 | 0.638450112702 |
| C68  | C | 0.979035731196 | 0.725610142205 | 0.361549887298 |
| C69  | C | 0.961776778276 | 0.235027174048 | 0.659347541807 |
| C70  | C | 0.038223221724 | 0.735027174048 | 0.340652458192 |
| C71  | C | 0.056905944930 | 0.154799219445 | 0.647210497594 |
| C72  | C | 0.943094055070 | 0.654799219445 | 0.352789502406 |
| C73  | C | 0.913329043030 | 0.287206744852 | 0.709970577815 |
| C74  | C | 0.086670956970 | 0.787206744852 | 0.290029422185 |
| C75  | C | 0.872537928012 | 0.344287891009 | 0.691757068116 |
| C76  | C | 0.127462071988 | 0.844287891009 | 0.308242931884 |
| C77  | C | 0.932759179639 | 0.316240804113 | 0.744729207951 |
| C78  | C | 0.067240820361 | 0.816240804113 | 0.255270792049 |
| C79  | C | 0.879138148932 | 0.341136669156 | 0.767136921760 |
| C80  | C | 0.120861851068 | 0.841136669156 | 0.232863078240 |
| C81  | C | 0.834758168197 | 0.279957760413 | 0.778544648271 |
| C82  | C | 0.165241831803 | 0.779957760413 | 0.221455351729 |
| C83  | C | 0.839132463785 | 0.167517113706 | 0.815298461984 |
| C84  | C | 0.160867536215 | 0.667517113706 | 0.184701538016 |
| C85  | C | 0.863238351379 | 0.455904149905 | 0.657698816614 |
| C86  | C | 0.136761648621 | 0.955904149905 | 0.342301183386 |
| C87  | C | 0.825526206716 | 0.417761530638 | 0.629895894543 |
| C88  | C | 0.174473793284 | 0.917761530638 | 0.370104105457 |
| C89  | C | 0.902062359413 | 0.518664135749 | 0.642267889423 |
| C90  | C | 0.097937640587 | 0.018664135749 | 0.357732110577 |
| C91  | C | 0.828353676217 | 0.332486950925 | 0.582068639631 |
| C92  | C | 0.171646323783 | 0.832486950925 | 0.417931360369 |
| C93  | C | 0.778113002215 | 0.279402179297 | 0.595272534743 |
| C94  | C | 0.221886997785 | 0.779402179297 | 0.404727465257 |
| C95  | C | 0.877623111753 | 0.291765112364 | 0.561459062937 |
| C96  | C | 0.122376888247 | 0.791765112364 | 0.438540937063 |
| C97  | C | 0.921961529740 | 0.347412932326 | 0.544313007043 |
| C98  | C | 0.078038470260 | 0.847412932326 | 0.455686992957 |
| C99  | C | 0.748910876201 | 0.193414179828 | 0.640924948664 |
| C100 | C | 0.251089123800 | 0.693414179828 | 0.359075051336 |
| C101 | C | 0.690698364097 | 0.234956286871 | 0.651803901507 |
| C102 | C | 0.309301635903 | 0.734956286871 | 0.348196098493 |
| C103 | C | 0.782630212756 | 0.157183786758 | 0.670827214762 |
| C104 | C | 0.217369787244 | 0.657183786758 | 0.329172785238 |
| C105 | C | 0.741973549580 | 0.112988739186 | 0.694136817334 |
| C106 | C | 0.258026450420 | 0.612988739186 | 0.305863182666 |
| C107 | C | 0.712950574196 | 0.148265768377 | 0.721337794494 |
| C108 | C | 0.287049425804 | 0.648265768377 | 0.278662205506 |

|      |   |                |                |                |
|------|---|----------------|----------------|----------------|
| C109 | C | 0.732582623377 | 0.036140890611 | 0.689256289129 |
| C110 | C | 0.267417376623 | 0.536140890611 | 0.310743710871 |
| C111 | C | 0.675271882332 | 0.107704000719 | 0.743019271243 |
| C112 | C | 0.324728117668 | 0.607704000719 | 0.256980728757 |
| C113 | C | 0.694369819902 | 0.995364464838 | 0.710743588347 |
| C114 | C | 0.305630180098 | 0.495364464838 | 0.289256411652 |
| C115 | C | 0.665572974720 | 0.031359251275 | 0.737646841952 |
| C116 | C | 0.334427025280 | 0.531359251275 | 0.262353158048 |
| C117 | C | 0.644584123521 | 0.340635424321 | 0.680160606449 |
| C118 | C | 0.355415876479 | 0.840635424321 | 0.319839393550 |
| C119 | C | 0.604070888660 | 0.366993728350 | 0.650941026209 |
| C120 | C | 0.395929111340 | 0.866993728350 | 0.349058973791 |
| C121 | C | 0.661632506043 | 0.406464643800 | 0.702922470406 |
| C122 | C | 0.338367493957 | 0.906464643800 | 0.297077529594 |
| C123 | C | 0.686734913573 | 0.382461539315 | 0.736853777446 |
| C124 | C | 0.313265086427 | 0.882461539315 | 0.263146222554 |
| C125 | C | 0.596819454253 | 0.402423485640 | 0.591841172814 |
| C126 | C | 0.403180545748 | 0.902423485640 | 0.408158827186 |
| C127 | C | 0.563508440292 | 0.332698039138 | 0.578733713148 |
| C128 | C | 0.436491559708 | 0.832698039138 | 0.421266286851 |
| C129 | C | 0.637892318580 | 0.440011479240 | 0.565048962067 |
| C130 | C | 0.362107681420 | 0.940011479240 | 0.434951037933 |
| C131 | C | 0.609104599645 | 0.436179945177 | 0.530098162765 |
| C132 | C | 0.390895400355 | 0.936179945177 | 0.469901837235 |
| C133 | C | 0.650424684964 | 0.520556076801 | 0.575906403483 |
| C134 | C | 0.349575315036 | 0.020556076801 | 0.424093596517 |
| C135 | C | 0.569005434074 | 0.198712694148 | 0.566208322588 |
| C136 | C | 0.430994565927 | 0.698712694148 | 0.433791677412 |
| C137 | C | 0.512734753366 | 0.180248443482 | 0.588440669113 |
| C138 | C | 0.487265246634 | 0.680248443482 | 0.411559330887 |
| C139 | C | 0.620106440754 | 0.139298392207 | 0.567585990735 |
| C140 | C | 0.379893559246 | 0.639298392207 | 0.432414009265 |
| C141 | C | 0.468492673033 | 0.184531882703 | 0.644960314912 |
| C142 | C | 0.531507326967 | 0.684531882703 | 0.355039685087 |
| C143 | C | 0.414694652441 | 0.239123194578 | 0.642044850561 |
| C144 | C | 0.585305347559 | 0.739123194578 | 0.357955149439 |
| C145 | C | 0.494622598096 | 0.186669010726 | 0.680782029896 |
| C146 | C | 0.505377401904 | 0.686669010726 | 0.319217970104 |
| C147 | C | 0.535227698633 | 0.119339814436 | 0.689266067374 |
| C148 | C | 0.464772301367 | 0.619339814436 | 0.310733932626 |
| C149 | C | 0.499309256590 | 0.046929147061 | 0.694470167905 |
| C150 | C | 0.500690743410 | 0.546929147061 | 0.305529832095 |
| C151 | C | 0.414488296547 | 0.005606493239 | 0.732388608714 |
| C152 | C | 0.585511703453 | 0.505606493239 | 0.267611391285 |
| C153 | C | 0.370613494188 | 0.357285074793 | 0.623785101737 |
| C154 | C | 0.629386505812 | 0.857285074793 | 0.376214898263 |
| C155 | C | 0.311869773624 | 0.325576001606 | 0.608164740300 |
| C156 | C | 0.688130226376 | 0.825576001606 | 0.391835259700 |
| C157 | C | 0.389884913077 | 0.429417032142 | 0.605967484709 |
| C158 | C | 0.610115086923 | 0.929417032142 | 0.394032515291 |
| C159 | C | 0.433568350939 | 0.480615347397 | 0.625757804312 |
| C160 | C | 0.566431649061 | 0.980615347397 | 0.374242195688 |
| C161 | C | 0.449425436799 | 0.546298083105 | 0.602679326407 |
| C162 | C | 0.550574563201 | 0.046298083105 | 0.397320673593 |
| C163 | C | 0.406468309534 | 0.506039661962 | 0.659434605116 |
| C164 | C | 0.593531690466 | 0.006039661962 | 0.340565394884 |
| C165 | C | 0.257850592556 | 0.245516407494 | 0.568575422497 |
| C166 | C | 0.742149407444 | 0.745516407494 | 0.431424577503 |
| C167 | C | 0.246010046708 | 0.169327861276 | 0.585134127930 |
| C168 | C | 0.753989953292 | 0.669327861276 | 0.414865872070 |
| C169 | C | 0.268571595618 | 0.239600302779 | 0.530908084704 |
| C170 | C | 0.731428404382 | 0.739600302779 | 0.469091915296 |
| C171 | C | 0.337808530981 | 0.227348976721 | 0.528103589226 |



|      |   |                |                |                |
|------|---|----------------|----------------|----------------|
| C172 | C | 0.662191469019 | 0.727348976721 | 0.471896410774 |
| C173 | C | 0.364514345584 | 0.278023473477 | 0.555364929139 |
| C174 | C | 0.635485654416 | 0.778023473477 | 0.444635070861 |
| C175 | C | 0.260312856066 | 0.089871671215 | 0.634612204672 |
| C176 | C | 0.739687143934 | 0.589871671215 | 0.365387795328 |
| C177 | C | 0.290732929433 | 0.017264662862 | 0.623987200863 |
| C178 | C | 0.709267070567 | 0.517264662862 | 0.376012799137 |
| C179 | C | 0.367945777856 | 0.956839187814 | 0.588760425241 |
| C180 | C | 0.632054222144 | 0.456839187814 | 0.411239574759 |
| C181 | C | 0.392221913305 | 0.916247243766 | 0.619938236195 |
| C182 | C | 0.607778086695 | 0.416247243766 | 0.380061763805 |
| C183 | C | 0.423897623527 | 0.983086927420 | 0.567986604108 |
| C184 | C | 0.576102376473 | 0.483086927420 | 0.432013395892 |
| C185 | C | 0.456067800030 | 0.917860990003 | 0.550868045739 |
| C186 | C | 0.543932199970 | 0.417860990003 | 0.449131954261 |
| C187 | C | 0.411236785620 | 0.801900771528 | 0.651231792366 |
| C188 | C | 0.588763214380 | 0.301900771528 | 0.348768207634 |
| C189 | C | 0.478079487973 | 0.822371291837 | 0.657574976298 |
| C190 | C | 0.521920512027 | 0.322371291837 | 0.342425023702 |
| C191 | C | 0.404736413786 | 0.719417296929 | 0.641110045221 |
| C192 | C | 0.595263586214 | 0.219417296929 | 0.358889954779 |
| C193 | C | 0.344850493743 | 0.719218588246 | 0.621128281397 |
| C194 | C | 0.655149506257 | 0.219218588246 | 0.378871718602 |
| C195 | C | 0.344796783767 | 0.793756316260 | 0.602060931577 |
| C196 | C | 0.655203216233 | 0.293756316260 | 0.397939068423 |
| C197 | C | 0.556976885921 | 0.834716020389 | 0.700085274928 |
| C198 | C | 0.443023114080 | 0.334716020389 | 0.299914725072 |
| C199 | C | 0.598168485250 | 0.775815839048 | 0.683571349939 |
| C200 | C | 0.401831514750 | 0.275815839048 | 0.316428650061 |
| C201 | C | 0.564755600256 | 0.832093615663 | 0.738349622135 |
| C202 | C | 0.435244399744 | 0.332093615663 | 0.261650377865 |
| C203 | C | 0.534809978452 | 0.898253147426 | 0.756824504064 |
| C204 | C | 0.465190021548 | 0.398253147426 | 0.243175495936 |
| C205 | C | 0.555225213840 | 0.905185072980 | 0.793388110251 |
| C206 | C | 0.444774786160 | 0.405185072980 | 0.206611889749 |
| C207 | C | 0.613968724432 | 0.648027564078 | 0.664666257582 |
| C208 | C | 0.386031275568 | 0.148027564078 | 0.335333742418 |
| C209 | C | 0.632965701182 | 0.669125500291 | 0.628656412024 |
| C210 | C | 0.367034298818 | 0.169125500291 | 0.371343587976 |
| C211 | C | 0.581815049911 | 0.571927144929 | 0.665286874400 |
| C212 | C | 0.418184950089 | 0.071927144929 | 0.334713125600 |
| C213 | C | 0.602152724104 | 0.722822223105 | 0.574402488421 |
| C214 | C | 0.397847275896 | 0.222822223105 | 0.425597511579 |
| C215 | C | 0.643625180591 | 0.791933033476 | 0.574545241148 |
| C216 | C | 0.356374819409 | 0.291933033476 | 0.425454758852 |
| C217 | C | 0.542006233876 | 0.739347835231 | 0.555546946415 |
| C218 | C | 0.457993766125 | 0.239347835231 | 0.444453053585 |
| C219 | C | 0.507667594605 | 0.669354914916 | 0.543164078439 |
| C220 | C | 0.492332405395 | 0.169354914916 | 0.456835921560 |
| C221 | C | 0.440880433133 | 0.688399274304 | 0.534333558327 |
| C222 | C | 0.559119566867 | 0.188399274304 | 0.465666441673 |
| C223 | C | 0.540043207250 | 0.631334300102 | 0.513684467481 |
| C224 | C | 0.459956792751 | 0.131334300102 | 0.486315532519 |
| C225 | C | 0.672691626116 | 0.907805692702 | 0.600948414541 |
| C226 | C | 0.327308373884 | 0.407805692702 | 0.399051585459 |
| C227 | C | 0.738109074171 | 0.886434328448 | 0.611970984275 |
| C228 | C | 0.261890925829 | 0.386434328448 | 0.388029015725 |
| C229 | C | 0.644506268775 | 0.969023291314 | 0.622806884074 |
| C230 | C | 0.355493731225 | 0.469023291314 | 0.377193115926 |
| C231 | C | 0.804543358055 | 0.792290232525 | 0.639239898897 |
| C232 | C | 0.195456641946 | 0.292290232525 | 0.360760101103 |
| C233 | C | 0.838858776923 | 0.759996347591 | 0.608677116042 |
| C234 | C | 0.161141223077 | 0.259996347591 | 0.391322883958 |

|      |   |                |                |                |
|------|---|----------------|----------------|----------------|
| C235 | C | 0.795204744302 | 0.732769261833 | 0.666455297757 |
| C236 | C | 0.204795255698 | 0.232769261833 | 0.333544702243 |
| C237 | C | 0.840350613743 | 0.686152311814 | 0.557920353677 |
| C238 | C | 0.159649386258 | 0.186152311814 | 0.442079646323 |
| C239 | C | 0.851684087173 | 0.749314749384 | 0.532380976712 |
| C240 | C | 0.148315912827 | 0.249314749384 | 0.467619023288 |
| C241 | C | 0.808573139764 | 0.618431013519 | 0.541609226137 |
| C242 | C | 0.191426860236 | 0.118431013519 | 0.458390773863 |
| C243 | C | 0.810725376382 | 0.548062416282 | 0.563284662328 |
| C244 | C | 0.189274623618 | 0.048062416282 | 0.436715337672 |
| C245 | C | 0.824581050996 | 0.873424272040 | 0.510970417854 |
| C246 | C | 0.175418949004 | 0.373424272040 | 0.489029582146 |
| C247 | C | 0.882440110287 | 0.917464730733 | 0.521639399295 |
| C248 | C | 0.117559889713 | 0.417464730733 | 0.478360600705 |
| C249 | C | 0.766814997975 | 0.924211315325 | 0.510714251883 |
| C250 | C | 0.233185002025 | 0.424211315325 | 0.489285748117 |
| C251 | C | 0.767418154060 | 0.983622432164 | 0.483730846231 |
| C252 | C | 0.232581845940 | 0.483622432164 | 0.516269153769 |
| C253 | C | 0.755939323268 | 0.964843851775 | 0.450216374659 |
| C254 | C | 0.244060676732 | 0.464843851775 | 0.549783625341 |
| C255 | C | 0.779412117207 | 0.059001985164 | 0.490974683553 |
| C256 | C | 0.220587882793 | 0.559001985164 | 0.509025316447 |
| C257 | C | 0.756341764243 | 0.018525863313 | 0.424906007640 |
| C258 | C | 0.243658235757 | 0.518525863313 | 0.575093992360 |
| C259 | C | 0.780164894028 | 0.113528221399 | 0.465947481793 |
| C260 | C | 0.219835105972 | 0.613528221399 | 0.534052518207 |
| C261 | C | 0.768851468616 | 0.093774497738 | 0.432511377550 |
| C262 | C | 0.231148531384 | 0.593774497739 | 0.567488622450 |
| C263 | C | 0.925112252409 | 0.995440524677 | 0.566817170743 |
| C264 | C | 0.074887747591 | 0.495440524677 | 0.433182829257 |
| C265 | C | 0.984120200335 | 0.965860042886 | 0.582422660387 |
| C266 | C | 0.015879799665 | 0.465860042886 | 0.417577339612 |
| C267 | C | 0.895155029192 | 0.046110467353 | 0.594021774492 |
| C268 | C | 0.104844970808 | 0.546110467353 | 0.405978225508 |
| C269 | C | 0.839765240727 | 0.089094708294 | 0.581017115457 |
| C270 | C | 0.160234759273 | 0.589094708294 | 0.418982884543 |
| C271 | C | 0.031710167750 | 0.863387126362 | 0.614359790381 |
| C272 | C | 0.968289832250 | 0.363387126362 | 0.385640209619 |
| C273 | C | 0.018299849586 | 0.865505406901 | 0.652041963274 |
| C274 | C | 0.981700150414 | 0.365505406901 | 0.347958036726 |
| C275 | C | 0.946882931163 | 0.900040510747 | 0.697216172225 |
| C276 | C | 0.053117068837 | 0.400040510747 | 0.302783827774 |
| C277 | C | 0.924862770893 | 0.819004869368 | 0.704884583727 |
| C278 | C | 0.075137229107 | 0.319004869368 | 0.295115416273 |
| C279 | C | 0.894626750229 | 0.956076855919 | 0.703388716375 |
| C280 | C | 0.105373249771 | 0.456076855919 | 0.296611283625 |
| C281 | C | 0.896997831678 | 0.728554669065 | 0.748517702029 |
| C282 | C | 0.103002168322 | 0.228554669065 | 0.251482297971 |
| C283 | C | 0.847365732790 | 0.730076031834 | 0.775494834533 |
| C284 | C | 0.152634267211 | 0.230076031834 | 0.224505165467 |
| C285 | C | 0.956121582312 | 0.688784853398 | 0.762056556732 |
| C286 | C | 0.043878417688 | 0.188784853398 | 0.237943443268 |
| C287 | C | 0.980999226449 | 0.722894546929 | 0.794908216757 |
| C288 | C | 0.019000773551 | 0.222894546929 | 0.205091783243 |
| C289 | C | 0.004449461709 | 0.687055926412 | 0.734194409629 |
| C290 | C | 0.995550538291 | 0.187055926412 | 0.265805590371 |
| C291 | C | 0.033995080068 | 0.678972749489 | 0.810910893825 |
| C292 | C | 0.966004919932 | 0.178972749489 | 0.189089106175 |
| C293 | C | 0.772126350789 | 0.653332242257 | 0.805907606296 |
| C294 | C | 0.227873649211 | 0.153332242257 | 0.194092393703 |
| C295 | C | 0.804354674215 | 0.598536066809 | 0.829573804392 |
| C296 | C | 0.195645325785 | 0.098536066809 | 0.170426195608 |
| C297 | C | 0.710115373663 | 0.616840762713 | 0.795756210169 |

|      |   |                |                |                |
|------|---|----------------|----------------|----------------|
| C298 | C | 0.289884626337 | 0.116840762713 | 0.204243789831 |
| C299 | C | 0.674925234206 | 0.662149630834 | 0.769207217869 |
| C300 | C | 0.325074765794 | 0.162149630834 | 0.230792782131 |
| C301 | C | 0.669110367770 | 0.603071063784 | 0.826610541322 |
| C302 | C | 0.330889632230 | 0.103071063784 | 0.173389458678 |
| C303 | C | 0.631871537263 | 0.612120519023 | 0.748989116440 |
| C304 | C | 0.368128462737 | 0.112120519023 | 0.251010883560 |
| C305 | C | 0.817479121501 | 0.562274294268 | 0.888359970444 |
| C306 | C | 0.182520878499 | 0.062274294268 | 0.111640029555 |
| C307 | C | 0.761514311710 | 0.553400116941 | 0.911579263106 |
| C308 | C | 0.238485688290 | 0.053400116941 | 0.088420736894 |
| C309 | C | 0.876522483658 | 0.585479632716 | 0.907832202053 |
| C310 | C | 0.123477516342 | 0.085479632716 | 0.092167797947 |
| C311 | C | 0.869470301955 | 0.662055014903 | 0.925346194521 |
| C312 | C | 0.130529698045 | 0.162055014903 | 0.074653805479 |
| C313 | C | 0.932416279344 | 0.581382223619 | 0.884323944935 |
| C314 | C | 0.067583720656 | 0.081382223619 | 0.115676055065 |
| C315 | C | 0.920798462288 | 0.680036716155 | 0.950330813826 |
| C316 | C | 0.079201537712 | 0.180036716155 | 0.049669186174 |
| C317 | C | 0.706063458037 | 0.478135138608 | 0.952914815061 |
| C318 | C | 0.293936541963 | 0.978135138608 | 0.047085184939 |
| C319 | C | 0.721753742217 | 0.515559451276 | 0.986664841239 |
| C320 | C | 0.278246257783 | 0.015559451276 | 0.013335158761 |
| C321 | C | 0.697589876135 | 0.392611677596 | 0.955450459064 |
| C322 | C | 0.302410123865 | 0.892611677596 | 0.044549540936 |
| C323 | C | 0.760224246299 | 0.360518491319 | 0.944854714434 |
| C324 | C | 0.239775753701 | 0.860518491319 | 0.055145285566 |
| C325 | C | 0.783895603140 | 0.415082555393 | 0.918102717583 |
| C326 | C | 0.216104396860 | 0.915082555393 | 0.081897282417 |
| C327 | C | 0.799969192222 | 0.576469154867 | 0.020622427251 |
| C328 | C | 0.200030807778 | 0.076469154867 | 0.979377572749 |
| C329 | C | 0.792712738599 | 0.660594179132 | 0.013174154160 |
| C330 | C | 0.207287261401 | 0.160594179132 | 0.986825845840 |
| C331 | C | 0.817657503657 | 0.789040056325 | 0.032690618590 |
| C332 | C | 0.182342496343 | 0.289040056325 | 0.967309381410 |
| C333 | C | 0.881070197794 | 0.822310720299 | 0.041389718404 |
| C334 | C | 0.118929802206 | 0.322310720299 | 0.958610281596 |
| C335 | C | 0.766467253787 | 0.824532095464 | 0.053684808626 |
| C336 | C | 0.233532746213 | 0.324532095464 | 0.946315191374 |
| C337 | C | 0.992952492915 | 0.798487568229 | 0.042241623012 |
| C338 | C | 0.007047507085 | 0.298487568229 | 0.957758376988 |
| C339 | C | 0.028098561413 | 0.781310011453 | 0.009973199787 |
| C340 | C | 0.971901438587 | 0.281310011453 | 0.990026800213 |
| C341 | C | 0.019982684353 | 0.761242734865 | 0.073802191196 |
| C342 | C | 0.980017315647 | 0.261242734865 | 0.926197808804 |
| C343 | C | 0.085427571714 | 0.785942992952 | 0.080948532338 |
| C344 | C | 0.914572428286 | 0.285942992952 | 0.919051467662 |
| C345 | C | 0.062407940036 | 0.836912714542 | 0.957039170203 |
| C346 | C | 0.937592059964 | 0.336912714542 | 0.042960829797 |
| C347 | C | 0.132334212003 | 0.830702270093 | 0.961748637746 |
| C348 | C | 0.867665787997 | 0.330702270093 | 0.038251362254 |
| C349 | C | 0.048075277724 | 0.908549720443 | 0.937469312094 |
| C350 | C | 0.951924722276 | 0.408549720443 | 0.062530687906 |
| C351 | C | 0.230325395432 | 0.782026617913 | 0.941965889408 |
| C352 | C | 0.769674604568 | 0.282026617913 | 0.058034110592 |
| C353 | C | 0.261002161645 | 0.855214023207 | 0.930241618262 |
| C354 | C | 0.738997838355 | 0.355214023207 | 0.069758381738 |
| C355 | C | 0.244747979398 | 0.716004827930 | 0.918188216172 |
| C356 | C | 0.755252020602 | 0.216004827930 | 0.081811783828 |
| C357 | C | 0.195482484079 | 0.724170565351 | 0.891051485501 |
| C358 | C | 0.804517515921 | 0.224170565351 | 0.108948514498 |
| C359 | C | 0.138144314534 | 0.747162548800 | 0.910734552194 |
| C360 | C | 0.861855685466 | 0.247162548800 | 0.089265447806 |

|      |   |                |                |                |
|------|---|----------------|----------------|----------------|
| C361 | C | 0.356744248901 | 0.927492316028 | 0.929598337055 |
| C362 | C | 0.643255751099 | 0.427492316028 | 0.070401662945 |
| C363 | C | 0.366469193059 | 0.940958531243 | 0.892098952724 |
| C364 | C | 0.633530806941 | 0.440958531243 | 0.107901047276 |
| C365 | C | 0.358603041261 | 0.889311371696 | 0.834835688376 |
| C366 | C | 0.641396958739 | 0.389311371696 | 0.165164311624 |
| C367 | C | 0.295162547165 | 0.904589462925 | 0.819172447863 |
| C368 | C | 0.704837452835 | 0.404589462925 | 0.180827552137 |
| C369 | C | 0.392877153085 | 0.823529888702 | 0.818683152512 |
| C370 | C | 0.607122846915 | 0.323529888702 | 0.181316847488 |
| C371 | C | 0.369258915492 | 0.744651280940 | 0.826879893133 |
| C372 | C | 0.630741084508 | 0.244651280940 | 0.173120106867 |
| C373 | C | 0.185533637653 | 0.932454073514 | 0.829714507479 |
| C374 | C | 0.814466362347 | 0.432454073514 | 0.170285492521 |
| C375 | C | 0.163804284886 | 0.990795244846 | 0.855348580076 |
| C376 | C | 0.836195715114 | 0.490795244847 | 0.144651419924 |
| C377 | C | 0.139095282753 | 0.868704508647 | 0.824996566280 |
| C378 | C | 0.860904717247 | 0.368704508647 | 0.175003433720 |
| C379 | C | 0.155466932977 | 0.818910174688 | 0.795872421252 |
| C380 | C | 0.844533067023 | 0.318910174688 | 0.204127578748 |
| C381 | C | 0.204907473667 | 0.768520623331 | 0.797326840276 |
| C382 | C | 0.795092526333 | 0.268520623331 | 0.202673159724 |
| C383 | C | 0.123739124146 | 0.825619069762 | 0.765582751794 |
| C384 | C | 0.876260875854 | 0.325619069762 | 0.234417248206 |
| C385 | C | 0.222236498304 | 0.727180307548 | 0.769361054805 |
| C386 | C | 0.777763501696 | 0.227180307548 | 0.230638945195 |
| C387 | C | 0.139843394877 | 0.783555545332 | 0.737418900907 |
| C388 | C | 0.860156605123 | 0.283555545332 | 0.262581099093 |
| C389 | C | 0.189141828705 | 0.733492016209 | 0.739370036353 |
| C390 | C | 0.810858171295 | 0.233492016209 | 0.260629963647 |
| C391 | C | 0.197236943956 | 0.103551054450 | 0.885313901892 |
| C392 | C | 0.802763056044 | 0.603551054450 | 0.114686098108 |
| C393 | C | 0.150740711852 | 0.165839261192 | 0.878124557013 |
| C394 | C | 0.849259288148 | 0.665839261192 | 0.121875442987 |
| C395 | C | 0.261017118520 | 0.137051878869 | 0.892298119470 |
| C396 | C | 0.738982881480 | 0.637051878869 | 0.107701880530 |
| C397 | C | 0.092827455112 | 0.233957859579 | 0.835642960395 |
| C398 | C | 0.907172544888 | 0.733957859579 | 0.164357039604 |
| C399 | C | 0.024691853496 | 0.212748750420 | 0.830670665550 |
| C400 | C | 0.975308146504 | 0.712748750420 | 0.169329334450 |
| C401 | C | 0.122810933772 | 0.268811140786 | 0.804322889002 |
| C402 | C | 0.877189066228 | 0.768811140786 | 0.195677110997 |
| C403 | C | 0.191699966870 | 0.279579083287 | 0.809815726470 |
| C404 | C | 0.808300033130 | 0.779579083287 | 0.190184273530 |
| N1   | N | 0.655528592047 | 0.735920891943 | 0.913616118429 |
| N2   | N | 0.344471407954 | 0.235920891943 | 0.086383881571 |
| N3   | N | 0.728583467397 | 0.882997056067 | 0.866841802912 |
| N4   | N | 0.271416532603 | 0.382997056067 | 0.133158197087 |
| N5   | N | 0.877813944435 | 0.915557136454 | 0.833179513374 |
| N6   | N | 0.122186055565 | 0.415557136454 | 0.166820486626 |
| N7   | N | 0.002248365501 | 0.021594412760 | 0.799584777492 |
| N8   | N | 0.997751634499 | 0.521594412760 | 0.200415222508 |
| N9   | N | 0.126189885208 | 0.024201017104 | 0.739948156215 |
| N10  | N | 0.873810114792 | 0.524201017104 | 0.260051843785 |
| N11  | N | 0.182397189073 | 0.154968103685 | 0.721050451058 |
| N12  | N | 0.817602810928 | 0.654968103685 | 0.278949548942 |
| N13  | N | 0.159812706914 | 0.353405683486 | 0.729249725470 |
| N14  | N | 0.840187293086 | 0.853405683486 | 0.270750274529 |
| N15  | N | 0.103260831005 | 0.424174977746 | 0.671896161995 |
| N16  | N | 0.896739168995 | 0.924174977746 | 0.328103838005 |
| N17  | N | 0.058630137097 | 0.293043013356 | 0.641376489430 |
| N18  | N | 0.941369862903 | 0.793043013356 | 0.358623510570 |
| N19  | N | 0.967087233686 | 0.265804352289 | 0.690200656741 |

|     |   |                |                |                |
|-----|---|----------------|----------------|----------------|
| N20 | N | 0.032912766314 | 0.765804352289 | 0.309799343258 |
| N21 | N | 0.863973431339 | 0.230384579330 | 0.803127699337 |
| N22 | N | 0.136026568661 | 0.730384579330 | 0.196872300663 |
| N23 | N | 0.779595908864 | 0.151714644602 | 0.810209675189 |
| N24 | N | 0.220404091136 | 0.651714644602 | 0.189790324811 |
| N25 | N | 0.875637547278 | 0.118719852079 | 0.831566888636 |
| N26 | N | 0.124362452722 | 0.618719852079 | 0.168433111364 |
| N27 | N | 0.900149742767 | 0.400684277218 | 0.675400492922 |
| N28 | N | 0.099850257233 | 0.900684277218 | 0.324599507078 |
| N29 | N | 0.856984980832 | 0.371939357721 | 0.609911491191 |
| N30 | N | 0.143015019168 | 0.871939357721 | 0.390088508809 |
| N31 | N | 0.972421662924 | 0.315911962980 | 0.530484867401 |
| N32 | N | 0.027578337076 | 0.815911962980 | 0.469515132599 |
| N33 | N | 0.791734947030 | 0.242926714388 | 0.623812884578 |
| N34 | N | 0.208265052971 | 0.742926714388 | 0.376187115422 |
| N35 | N | 0.698230124094 | 0.300106904891 | 0.668288929853 |
| N36 | N | 0.301769875906 | 0.800106904891 | 0.331711070147 |
| N37 | N | 0.727923386192 | 0.427380901862 | 0.751195931861 |
| N38 | N | 0.272076613809 | 0.927380901862 | 0.248804068139 |
| N39 | N | 0.632129265336 | 0.386072961952 | 0.622124493481 |
| N40 | N | 0.367870734664 | 0.886072961952 | 0.377875506519 |
| N41 | N | 0.596989025532 | 0.269676241845 | 0.575819886357 |
| N42 | N | 0.403010974468 | 0.769676241845 | 0.424180113643 |
| N43 | N | 0.517491162854 | 0.198156599079 | 0.620961351580 |
| N44 | N | 0.482508837146 | 0.698156599079 | 0.379038648419 |
| N45 | N | 0.461732151455 | 0.051265923514 | 0.724906282175 |
| N46 | N | 0.538267848545 | 0.551265923514 | 0.275093717824 |
| N47 | N | 0.387279774285 | 0.963580014093 | 0.709164489146 |
| N48 | N | 0.612720225715 | 0.463580014093 | 0.290835510854 |
| N49 | N | 0.393891737418 | 0.002921886090 | 0.764097084205 |
| N50 | N | 0.606108262583 | 0.502921886090 | 0.235902915795 |
| N51 | N | 0.420937640423 | 0.303338422265 | 0.625226157217 |
| N52 | N | 0.579062359577 | 0.803338422265 | 0.374773842783 |
| N53 | N | 0.314320324024 | 0.281488178982 | 0.580902291397 |
| N54 | N | 0.685679675976 | 0.781488178982 | 0.419097708603 |
| N55 | N | 0.275351681189 | 0.154087080217 | 0.613880974187 |
| N56 | N | 0.724648318811 | 0.654087080217 | 0.386119025813 |
| N57 | N | 0.333209699717 | 0.021681300940 | 0.599542182959 |
| N58 | N | 0.666790300283 | 0.521681300940 | 0.400457817040 |
| N59 | N | 0.385326212530 | 0.841970035085 | 0.622441506251 |
| N60 | N | 0.614673787470 | 0.341970035085 | 0.377558493749 |
| N61 | N | 0.493342453349 | 0.826957752231 | 0.690029625175 |
| N62 | N | 0.506657546652 | 0.326957752231 | 0.309970374825 |
| N63 | N | 0.575232308047 | 0.706067614724 | 0.679464200450 |
| N64 | N | 0.424767691954 | 0.206067614724 | 0.320535799550 |
| N65 | N | 0.588747859938 | 0.696614282888 | 0.608450566003 |
| N66 | N | 0.411252140062 | 0.196614282888 | 0.391549433997 |
| N67 | N | 0.632858304425 | 0.843263537594 | 0.598657478118 |
| N68 | N | 0.367141695575 | 0.343263537594 | 0.401342521882 |
| N69 | N | 0.745108064053 | 0.824222101365 | 0.629992192832 |
| N70 | N | 0.254891935948 | 0.324222101365 | 0.370007807168 |
| N71 | N | 0.808886337642 | 0.712677693829 | 0.588073412062 |
| N72 | N | 0.191113662359 | 0.212677693829 | 0.411926587937 |
| N73 | N | 0.814045991815 | 0.809370172822 | 0.533096482621 |
| N74 | N | 0.185954008185 | 0.309370172822 | 0.466903517379 |
| N75 | N | 0.882878519508 | 0.939083037877 | 0.554508885505 |
| N76 | N | 0.117121480492 | 0.439083037877 | 0.445491114495 |
| N77 | N | 0.984329159071 | 0.894620615764 | 0.593220882368 |
| N78 | N | 0.015670840929 | 0.394620615764 | 0.406779117632 |
| N79 | N | 0.969447675726 | 0.904964504757 | 0.662903961424 |
| N80 | N | 0.030552324274 | 0.404964504757 | 0.337096038576 |
| N81 | N | 0.909229938955 | 0.804595955981 | 0.736938431092 |
| N82 | N | 0.090770061045 | 0.304595955981 | 0.263061568907 |

|      |   |                |                |                |
|------|---|----------------|----------------|----------------|
| N83  | N | 0.811768086412 | 0.668620378355 | 0.777317785577 |
| N84  | N | 0.188231913588 | 0.168620378355 | 0.222682214423 |
| N85  | N | 0.801357583170 | 0.615142160778 | 0.862129338035 |
| N86  | N | 0.198642416830 | 0.115142160778 | 0.137870661965 |
| N87  | N | 0.754251027016 | 0.486942745901 | 0.927291931428 |
| N88  | N | 0.245748972985 | 0.986942745901 | 0.072708068572 |
| N89  | N | 0.781586811807 | 0.531458112630 | 0.992525232086 |
| N90  | N | 0.218413188193 | 0.031458112630 | 0.007474767914 |
| N91  | N | 0.819562372994 | 0.707522965579 | 0.035207243753 |
| N92  | N | 0.180437627006 | 0.207522965579 | 0.964792756247 |
| N93  | N | 0.929443008830 | 0.776209678817 | 0.036463094456 |
| N94  | N | 0.070556991170 | 0.276209678817 | 0.963536905544 |
| N95  | N | 0.032544357228 | 0.840249239309 | 0.989361791568 |
| N96  | N | 0.967455642772 | 0.340249239309 | 0.010638208432 |
| N97  | N | 0.163466603854 | 0.788302967861 | 0.939769093117 |
| N98  | N | 0.836533396146 | 0.288302967861 | 0.060230906883 |
| N99  | N | 0.321082854883 | 0.861592011329 | 0.938410265102 |
| N100 | N | 0.678917145117 | 0.361592011329 | 0.061589734898 |
| N101 | N | 0.356608711443 | 0.882749293929 | 0.871150900674 |
| N102 | N | 0.643391288557 | 0.382749293929 | 0.128849099326 |
| N103 | N | 0.246603205770 | 0.907526811050 | 0.839894512201 |
| N104 | N | 0.753396794230 | 0.407526811050 | 0.160105487799 |
| N105 | N | 0.202137060563 | 0.049203027521 | 0.858510012451 |
| N106 | N | 0.797862939437 | 0.549203027521 | 0.141489987549 |
| N107 | N | 0.129774659126 | 0.171448858718 | 0.846961924666 |
| N108 | N | 0.870225340874 | 0.671448858718 | 0.153038075334 |
| N109 | N | 0.208544045251 | 0.329360849467 | 0.833487264397 |
| N110 | N | 0.791455954749 | 0.829360849467 | 0.166512735603 |
| O1   | O | 0.747949308550 | 0.757735045431 | 0.869506857597 |
| O2   | O | 0.252050691450 | 0.257735045431 | 0.130493142403 |
| O3   | O | 0.691615746532 | 0.795629061569 | 0.972300495803 |
| O4   | O | 0.308384253468 | 0.295629061569 | 0.027699504197 |
| O5   | O | 0.826390069803 | 0.989607342012 | 0.870950945112 |
| O6   | O | 0.173609930198 | 0.489607342012 | 0.129049054888 |
| O7   | O | 0.699039299891 | 0.993749691967 | 0.819199957305 |
| O8   | O | 0.300960700109 | 0.493749691967 | 0.180800042695 |
| O9   | O | 0.955607982911 | 0.917162376759 | 0.779720105512 |
| O10  | O | 0.044392017089 | 0.417162376759 | 0.220279894488 |
| O11  | O | 0.122920510577 | 0.075029140035 | 0.791977674852 |
| O12  | O | 0.877079489423 | 0.575029140035 | 0.208022325148 |
| O13  | O | 0.277197174639 | 0.112437986904 | 0.736091906720 |
| O14  | O | 0.722802825361 | 0.612437986904 | 0.263908093280 |
| O15  | O | 0.091761559832 | 0.257650599089 | 0.721232082033 |
| O16  | O | 0.908238440168 | 0.757650599089 | 0.278767917966 |
| O17  | O | 0.184547555882 | 0.248066292969 | 0.657319899247 |
| O18  | O | 0.815452444118 | 0.748066292969 | 0.342680100753 |
| O19  | O | 0.017864556332 | 0.426907074735 | 0.704652970979 |
| O20  | O | 0.982135443668 | 0.926907074735 | 0.295347029021 |
| O21  | O | 0.984747027214 | 0.362886907620 | 0.616748798828 |
| O22  | O | 0.015252972786 | 0.862886907620 | 0.383251201172 |
| O23  | O | 0.911553394608 | 0.215718483540 | 0.647496453324 |
| O24  | O | 0.088446605392 | 0.715718483540 | 0.352503546675 |
| O25  | O | 0.815604855777 | 0.336972763467 | 0.692825096002 |
| O26  | O | 0.184395144223 | 0.836972763467 | 0.307174903998 |
| O27  | O | 0.769188323997 | 0.430328373041 | 0.626411894524 |
| O28  | O | 0.230811676003 | 0.930328373041 | 0.373588105476 |
| O29  | O | 0.935345532026 | 0.556441944035 | 0.667630014501 |
| O30  | O | 0.064654467974 | 0.056441944035 | 0.332369985499 |
| O31  | O | 0.728416822200 | 0.272344302443 | 0.580318955742 |
| O32  | O | 0.271583177800 | 0.772344302443 | 0.419681044258 |
| O33  | O | 0.910259697814 | 0.414780488802 | 0.543027734231 |
| O34  | O | 0.089740302186 | 0.914780488802 | 0.456972265769 |
| O35  | O | 0.639381233874 | 0.207948115298 | 0.645725104708 |

|     |   |                |                |                |
|-----|---|----------------|----------------|----------------|
| 036 | O | 0.360618766126 | 0.707948115298 | 0.354274895292 |
| 037 | O | 0.547295528908 | 0.369744811387 | 0.654421663951 |
| 038 | O | 0.452704471092 | 0.869744811387 | 0.345578336049 |
| 039 | O | 0.666357138597 | 0.324883767956 | 0.750979617150 |
| 040 | O | 0.333642861403 | 0.824883767956 | 0.249020382850 |
| 041 | O | 0.508090313730 | 0.335321359850 | 0.571481323594 |
| 042 | O | 0.491909686270 | 0.835321359850 | 0.428518676406 |
| 043 | O | 0.465505989384 | 0.151859700503 | 0.576341321172 |
| 044 | O | 0.534494010617 | 0.651859700503 | 0.423658678828 |
| 045 | O | 0.364972581277 | 0.222124989399 | 0.656022367844 |
| 046 | O | 0.635027418723 | 0.722124989399 | 0.343977632156 |
| 047 | O | 0.261273898606 | 0.341129822746 | 0.621546290259 |
| 048 | O | 0.738726101394 | 0.841129822746 | 0.378453709741 |
| 049 | O | 0.208829654530 | 0.124954033746 | 0.571895832921 |
| 050 | O | 0.791170345470 | 0.624954033746 | 0.428104167078 |
| 051 | O | 0.277328271635 | 0.957654093758 | 0.637882630482 |
| 052 | O | 0.722671728365 | 0.457654093758 | 0.362117369518 |
| 053 | O | 0.420805297837 | 0.953470534007 | 0.641159122064 |
| 054 | O | 0.579194702163 | 0.453470534007 | 0.358840877936 |
| 055 | O | 0.404303281533 | 0.038841714795 | 0.544564555828 |
| 056 | O | 0.595696718467 | 0.538841714795 | 0.455435444172 |
| 057 | O | 0.515829663403 | 0.827381838304 | 0.634073805464 |
| 058 | O | 0.484170336597 | 0.327381838304 | 0.365926194536 |
| 059 | O | 0.650690670858 | 0.793546560370 | 0.674437606295 |
| 060 | O | 0.349309329142 | 0.293546560370 | 0.325562393705 |
| 061 | O | 0.553443979761 | 0.846612729828 | 0.811052897974 |
| 062 | O | 0.446556020239 | 0.346612729828 | 0.188947102026 |
| 063 | O | 0.572997286946 | 0.969121880993 | 0.803981373028 |
| 064 | O | 0.427002713054 | 0.469121880993 | 0.196018626972 |
| 065 | O | 0.686415684346 | 0.657996732547 | 0.618725293800 |
| 066 | O | 0.313584315654 | 0.157996732547 | 0.381274706200 |
| 067 | O | 0.684702700416 | 0.799598890296 | 0.553318240386 |
| 068 | O | 0.315297299584 | 0.299598890296 | 0.446681759613 |
| 069 | O | 0.781664884242 | 0.927009493450 | 0.602663054236 |
| 070 | O | 0.218335115758 | 0.427009493451 | 0.397336945764 |
| 071 | O | 0.893760991702 | 0.776593519864 | 0.603918428794 |
| 072 | O | 0.106239008298 | 0.276593519864 | 0.396081571206 |
| 073 | O | 0.895395871145 | 0.743315411015 | 0.512618491902 |
| 074 | O | 0.104604128855 | 0.243315411015 | 0.487381508098 |
| 075 | O | 0.747363950347 | 0.640275276405 | 0.533623515596 |
| 076 | O | 0.252636049653 | 0.140275276405 | 0.466376484404 |
| 077 | O | 0.923320560735 | 0.933904019409 | 0.501766905380 |
| 078 | O | 0.076679439265 | 0.433904019409 | 0.498233094620 |
| 079 | O | 0.771375806498 | 0.147849139019 | 0.408644057027 |
| 080 | O | 0.228624193502 | 0.647849139019 | 0.591355942973 |
| 081 | O | 0.026833239518 | 0.011028993259 | 0.586950812045 |
| 082 | O | 0.973166760482 | 0.511028993259 | 0.413049187955 |
| 083 | O | 0.881592409012 | 0.003193186005 | 0.623636903828 |
| 084 | O | 0.118407590988 | 0.503193186005 | 0.376363096172 |
| 085 | O | 0.052941466837 | 0.830648125756 | 0.671358430378 |
| 086 | O | 0.947058533163 | 0.330648125756 | 0.328641569622 |
| 087 | O | 0.922009679025 | 0.771917060148 | 0.682311781172 |
| 088 | O | 0.077990320975 | 0.271917060148 | 0.317688218827 |
| 089 | O | 0.843486491322 | 0.783216671829 | 0.795601960804 |
| 090 | O | 0.156513508678 | 0.283216671829 | 0.204398039196 |
| 091 | O | 0.827506097798 | 0.539091614714 | 0.818438437103 |
| 092 | O | 0.172493902203 | 0.039091614714 | 0.181561562897 |
| 093 | O | 0.725455867229 | 0.606177482503 | 0.916648835468 |
| 094 | O | 0.274544132771 | 0.106177482503 | 0.083351164532 |
| 095 | O | 0.679924505474 | 0.528665329943 | 0.006684938657 |
| 096 | O | 0.320075494527 | 0.028665329943 | 0.993315061343 |
| 097 | O | 0.764311782990 | 0.682074358857 | 0.988075007040 |
| 098 | O | 0.235688217010 | 0.182074358857 | 0.011924992960 |

|      |   |                |                |                |
|------|---|----------------|----------------|----------------|
| 099  | O | 0.886267904321 | 0.887921698012 | 0.051218271804 |
| 0100 | O | 0.113732095679 | 0.387921698012 | 0.948781728196 |
| 0101 | O | 0.047922249915 | 0.717849234874 | 0.003153529726 |
| 0102 | O | 0.952077750085 | 0.217849234874 | 0.996846470274 |
| 0103 | O | 0.982337527320 | 0.781968751912 | 0.101575314672 |
| 0104 | O | 0.017662472680 | 0.281968751912 | 0.898424685328 |
| 0105 | O | 0.158367745065 | 0.865382711707 | 0.984724229790 |
| 0106 | O | 0.841632254935 | 0.365382711707 | 0.015275770210 |
| 0107 | O | 0.233491587352 | 0.902172252342 | 0.913062888100 |
| 0108 | O | 0.766508412648 | 0.402172252342 | 0.086937111900 |
| 0109 | O | 0.383317506449 | 0.003839101315 | 0.882695207192 |
| 0110 | O | 0.616682493551 | 0.503839101315 | 0.117304792808 |
| 0111 | O | 0.291168802909 | 0.916860328788 | 0.788460170351 |
| 0112 | O | 0.708831197091 | 0.416860328788 | 0.211539829649 |
| 0113 | O | 0.324158892286 | 0.737268749047 | 0.846703135437 |
| 0114 | O | 0.675841107714 | 0.237268749047 | 0.153296864563 |
| 0115 | O | 0.398072692041 | 0.691812493113 | 0.812591923216 |
| 0116 | O | 0.601927307959 | 0.191812493113 | 0.187408076784 |
| 0117 | O | 0.115790690340 | 0.982724613400 | 0.871991185552 |
| 0118 | O | 0.884209309661 | 0.482724613400 | 0.128008814448 |
| 0119 | O | 0.206858471162 | 0.689113538025 | 0.713308209895 |
| 0120 | O | 0.793141528838 | 0.189113538025 | 0.286691790104 |
| 0121 | O | 0.135670636194 | 0.210315306232 | 0.901010298590 |
| 0122 | O | 0.864329363806 | 0.710315306232 | 0.098989701410 |
| 0123 | O | 0.005791804658 | 0.150562602653 | 0.841960086277 |
| 0124 | O | 0.994208195342 | 0.650562602653 | 0.158039913723 |
| 0125 | O | 0.229849273812 | 0.242284810464 | 0.793830001769 |
| 0126 | O | 0.770150726188 | 0.742284810464 | 0.206169998231 |
| 0127 | O | 0.991554330988 | 0.259972708917 | 0.815613472096 |
| 0128 | O | 0.008445669012 | 0.759972708917 | 0.184386527904 |
| 0129 | O | 0.703260959321 | 0.027536933647 | 0.890128618373 |
| 0130 | O | 0.296739040679 | 0.527536933647 | 0.109871381627 |
| 0131 | O | 0.283816578692 | 0.100194092812 | 0.808496851019 |
| 0132 | O | 0.716183421308 | 0.600194092812 | 0.191503148981 |
| 0133 | O | 0.456590929383 | 0.040218166605 | 0.827057976451 |
| 0134 | O | 0.543409070618 | 0.540218166605 | 0.172942023549 |
| 0135 | O | 0.290477680124 | 0.390675059370 | 0.726363649190 |
| 0136 | O | 0.709522319876 | 0.890675059370 | 0.273636350810 |
| 0137 | O | 0.236676525789 | 0.444035046420 | 0.669369284041 |
| 0138 | O | 0.763323474211 | 0.944035046420 | 0.330630715958 |
| 0139 | O | 0.253349424860 | 0.592611877085 | 0.652201866166 |
| 0140 | O | 0.746650575140 | 0.092611877085 | 0.347798133834 |
| 0141 | O | 0.330010477372 | 0.645322765857 | 0.703582827930 |
| 0142 | O | 0.669989522628 | 0.145322765857 | 0.296417172070 |
| 0143 | O | 0.348686340509 | 0.518534641481 | 0.744853018091 |
| 0144 | O | 0.651313659491 | 0.018534641480 | 0.255146981909 |
| 0145 | O | 0.695338299289 | 0.270462564532 | 0.813116193625 |
| 0146 | O | 0.304661700711 | 0.770462564532 | 0.186883806375 |
| 0147 | O | 0.907865044350 | 0.515399496610 | 0.734995895897 |
| 0148 | O | 0.092134955650 | 0.015399496610 | 0.265004104103 |
| 0149 | O | 0.791095040513 | 0.556462456814 | 0.726013457513 |
| 0150 | O | 0.208904959487 | 0.056462456814 | 0.273986542487 |
| 0151 | O | 0.738858537928 | 0.552578597911 | 0.662215196419 |
| 0152 | O | 0.261141462072 | 0.052578597911 | 0.337784803581 |
| 0153 | O | 0.001579392275 | 0.164067616435 | 0.562696208554 |
| 0154 | O | 0.998420607725 | 0.664067616435 | 0.437303791446 |
| 0155 | O | 0.548461306581 | 0.259286291140 | 0.747334645991 |
| 0156 | O | 0.451538693419 | 0.759286291140 | 0.252665354008 |
| 0157 | O | 0.480773180922 | 0.368448298047 | 0.714524060959 |
| 0158 | O | 0.519226819078 | 0.868448298047 | 0.285475939041 |
| 0159 | O | 0.476093098526 | 0.500178275708 | 0.743557536504 |
| 0160 | O | 0.523906901474 | 0.000178275708 | 0.256442463496 |
| 0161 | O | 0.351625832426 | 0.251819332517 | 0.726697098051 |



|      |   |                |                |                |
|------|---|----------------|----------------|----------------|
| 0162 | O | 0.648374167574 | 0.751819332517 | 0.273302901949 |
| 0163 | O | 0.114771502402 | 0.234669312571 | 0.556316137878 |
| 0164 | O | 0.885228497598 | 0.734669312571 | 0.443683862121 |
| 0165 | O | 0.145339446240 | 0.006058964927 | 0.608676406954 |
| 0166 | O | 0.854660553760 | 0.506058964927 | 0.391323593046 |
| 0167 | O | 0.252495522202 | 0.822931900880 | 0.668408369457 |
| 0168 | O | 0.747504477798 | 0.322931900880 | 0.331591630543 |
| 0169 | O | 0.283124016619 | 0.045526530146 | 0.518584735969 |
| 0170 | O | 0.716875983382 | 0.545526530146 | 0.481415264031 |
| 0171 | O | 0.416878476340 | 0.778598297389 | 0.739001449039 |
| 0172 | O | 0.583121523660 | 0.278598297389 | 0.260998550961 |
| 0173 | O | 0.308742969923 | 0.840828110699 | 0.726532570091 |
| 0174 | O | 0.691257030077 | 0.340828110699 | 0.273467429909 |
| 0175 | O | 0.487653693494 | 0.652916406510 | 0.731745383609 |
| 0176 | O | 0.512346306506 | 0.152916406510 | 0.268254616391 |
| 0177 | O | 0.531638493109 | 0.111675529848 | 0.780790600493 |
| 0178 | O | 0.468361506892 | 0.611675529848 | 0.219209399507 |
| 0179 | O | 0.518977268636 | 0.697816626045 | 0.798358636854 |
| 0180 | O | 0.481022731364 | 0.197816626045 | 0.201641363146 |
| 0181 | O | 0.577950125303 | 0.750217244394 | 0.861032461759 |
| 0182 | O | 0.422049874697 | 0.250217244394 | 0.138967538240 |
| 0183 | O | 0.148264785001 | 0.737017726123 | 0.656187523249 |
| 0184 | O | 0.851735214999 | 0.237017726123 | 0.343812476751 |
| 0185 | O | 0.982691194311 | 0.683476624491 | 0.637352721279 |
| 0186 | O | 0.017308805689 | 0.183476624491 | 0.362647278721 |
| 0187 | O | 0.951641615857 | 0.502950286173 | 0.800923510734 |
| 0188 | O | 0.048358384143 | 0.002950286172 | 0.199076489266 |
| 0189 | O | 0.749431199643 | 0.419563740046 | 0.826860369419 |
| 0190 | O | 0.250568800357 | 0.919563740046 | 0.173139630581 |
| 0191 | O | 0.889483030158 | 0.458116299867 | 0.966302045034 |
| 0192 | O | 0.110516969842 | 0.958116299867 | 0.033697954966 |
| 0193 | O | 0.008539828740 | 0.484336570351 | 0.989395943013 |
| 0194 | O | 0.991460171260 | 0.984336570351 | 0.010604056987 |
| 0195 | O | 0.974679750373 | 0.603014618757 | 0.027982264702 |
| 0196 | O | 0.025320249627 | 0.103014618757 | 0.972017735298 |
| 0197 | O | 0.963733384301 | 0.583315287214 | 0.097999546455 |
| 0198 | O | 0.036266615699 | 0.083315287214 | 0.902000453545 |
| 0199 | O | 0.093411308969 | 0.594636021531 | 0.094017152891 |
| 0200 | O | 0.906588691031 | 0.094636021531 | 0.905982847109 |
| 0201 | O | 0.362318476067 | 0.734006251411 | 0.977689994587 |
| 0202 | O | 0.637681523933 | 0.234006251411 | 0.022310005413 |
| 0203 | O | 0.293681177734 | 0.584559129493 | 0.863272290993 |
| 0204 | O | 0.706318822267 | 0.084559129493 | 0.136727709007 |
| 0205 | O | 0.373215459773 | 0.544154432226 | 0.809107333008 |
| 0206 | O | 0.626784540227 | 0.044154432226 | 0.190892666992 |
| 0207 | O | 0.003178187284 | 0.392372712927 | 0.847486306728 |
| 0208 | O | 0.996821812716 | 0.892372712927 | 0.152513693272 |
| 0209 | O | 0.119881498450 | 0.413494941220 | 0.874343768312 |
| 0210 | O | 0.880118501550 | 0.913494941220 | 0.125656231687 |
| 0211 | O | 0.157695865316 | 0.561424818573 | 0.862435827686 |
| 0212 | O | 0.842304134684 | 0.061424818573 | 0.137564172314 |
| S1   | S | 0.952181850748 | 0.838985874846 | 0.891813406985 |
| S2   | S | 0.047818149252 | 0.338985874846 | 0.108186593015 |
| S3   | S | 0.914169786136 | 0.103229285537 | 0.743860004386 |
| S4   | S | 0.085830213864 | 0.603229285537 | 0.256139995614 |
| S5   | S | 0.595538235707 | 0.043159501991 | 0.558967282485 |
| S6   | S | 0.404461764293 | 0.543159501991 | 0.441032717515 |
| S7   | S | 0.570805918082 | 0.003714643744 | 0.606340271636 |
| S8   | S | 0.429194081918 | 0.503714643744 | 0.393659728364 |
| S9   | S | 0.914270186479 | 0.055407536839 | 0.696177312427 |
| S10  | S | 0.085729813521 | 0.555407536839 | 0.303822687572 |
| S11  | S | 0.965643948017 | 0.920243219291 | 0.928417832773 |
| S12  | S | 0.034356051983 | 0.420243219291 | 0.071582167227 |

#END

### 3) CRAMBIN CRYSTAL – optimized 172W

```
data_CSD_CIF_MOLDRAW
_audit_creation_date 09-04-2015
_audit_creation_method MOLDRAW
_chemical_formula_sum 'H974 C404 N110 O300 S12'
_chemical_formula_moiety
;
H974 C404 N110 O300 S12
;
loop_
  _publ_author_name
  Delle Piane, Corno, Orlando, Dovesi, Ugliengo
  _cell_volume 15908.3864
  _exptl_crystal_density_diffn ?
  _diffn_ambient_temperature ?
  _refine_ls_R_factor_gt ?
  _refine_ls_wR_factor_gt ?
  _symmetry_space_group_name_H-M 'P 1'
  _symmetry_cell_setting triclinic
  _symmetry_Int_Tables_number 1
loop_
  _symmetry_equiv_pos_site_id
  _symmetry_equiv_pos_as_xyz
  1 x,y,z
  _cell_length_a 22.1157478
  _cell_length_b 18.1060023
  _cell_length_c 39.7321474
  _cell_angle_alpha 89.996365
  _cell_angle_beta 90.778119
  _cell_angle_gamma 90.028828
  _cell_formula_units_Z 1
loop_
  _atom_type_symbol
  _atom_type_radius_bond
  H .38
  C .77
  N .75
  O .73
  S 1.04
loop_
  _atom_site_label
  _atom_site_type_symbol
  _atom_site_fract_x
  _atom_site_fract_y
  _atom_site_fract_z
  H1 H 0.716064093014 0.718153111402 0.951247909248
  H2 H 0.296776637555 0.199642733966 0.121218279019
  H3 H 0.659033013041 0.755215927606 0.929041718822
  H4 H 0.360292472921 0.253259068248 0.129753571479
  H5 H 0.659391833414 0.766290797433 0.971352084626
  H6 H 0.342779470756 0.222752724666 0.090983481752
  H7 H 0.686781700934 0.878767777848 0.949211575791
  H8 H 0.321015907196 0.357197143818 0.106394779055
  H9 H 0.798109294844 0.791267841393 0.970897935933
```

|     |   |                |                |                |
|-----|---|----------------|----------------|----------------|
| H10 | H | 0.214024321575 | 0.261944573275 | 0.083609886588 |
| H11 | H | 0.742079897837 | 0.789638210160 | 0.012696594763 |
| H12 | H | 0.263311200533 | 0.248924821088 | 0.040443710400 |
| H13 | H | 0.844681375765 | 0.907600053221 | 0.988854999726 |
| H14 | H | 0.177848029711 | 0.375197431686 | 0.053956142709 |
| H15 | H | 0.783493083393 | 0.959709549217 | 0.971914615376 |
| H16 | H | 0.239635046979 | 0.426618961129 | 0.070903999571 |
| H17 | H | 0.831500614944 | 0.909897170038 | 0.944638171158 |
| H18 | H | 0.182147333775 | 0.392671693883 | 0.097914863851 |
| H19 | H | 0.720994045434 | 0.944765154041 | 0.905689413899 |
| H20 | H | 0.285188237789 | 0.428243828475 | 0.149367260257 |
| H21 | H | 0.776008115361 | 0.858998827967 | 0.849980573661 |
| H22 | H | 0.209819747741 | 0.353608432460 | 0.199848497174 |
| H23 | H | 0.752553418069 | 0.962929528078 | 0.813259924653 |
| H24 | H | 0.199883633677 | 0.502529585851 | 0.214474755632 |
| H25 | H | 0.682217201828 | 0.039381819109 | 0.860941296198 |
| H26 | H | 0.324108929728 | 0.500696047544 | 0.202321636472 |
| H27 | H | 0.673880464127 | 0.869174500859 | 0.816596678579 |
| H28 | H | 0.220944812925 | 0.404071102662 | 0.254505788366 |
| H29 | H | 0.636510230630 | 0.956415169313 | 0.817086614316 |
| H30 | H | 0.268916760705 | 0.482011690371 | 0.261511830431 |
| H31 | H | 0.646171966315 | 0.905391532684 | 0.854830425561 |
| H32 | H | 0.298040346782 | 0.400522364670 | 0.242801161377 |
| H33 | H | 0.867524445754 | 0.878220295456 | 0.836045414794 |
| H34 | H | 0.119210709415 | 0.362331054203 | 0.206167165439 |
| H35 | H | 0.937082678304 | 0.995459799275 | 0.873444463463 |
| H36 | H | 0.046443023476 | 0.474291445355 | 0.167945071872 |
| H37 | H | 0.975157925284 | 0.835129183161 | 0.859087643210 |
| H38 | H | 0.004342463434 | 0.318264571706 | 0.187604115964 |
| H39 | H | 0.019847440687 | 0.903272145843 | 0.880148898051 |
| H40 | H | 0.965291457250 | 0.384349421916 | 0.162260428832 |
| H41 | H | 0.995517692432 | 0.065668556491 | 0.837273699409 |
| H42 | H | 0.001589710149 | 0.551681618409 | 0.206639547248 |
| H43 | H | 0.000866708217 | 0.999592179073 | 0.769241422453 |
| H44 | H | 0.999056841988 | 0.488190471288 | 0.275290222919 |
| H45 | H | 0.987266326789 | 0.160563075781 | 0.791249578317 |
| H46 | H | 0.011180295239 | 0.648558004356 | 0.251959969426 |
| H47 | H | 0.005440689246 | 0.136501316383 | 0.749556399669 |
| H48 | H | 0.997284142109 | 0.625305978603 | 0.294166262991 |
| H49 | H | 0.197843494279 | 0.005805788381 | 0.780693644290 |
| H50 | H | 0.801658790431 | 0.496445520429 | 0.269756407269 |
| H51 | H | 0.234565208797 | 0.983487351265 | 0.716007204795 |
| H52 | H | 0.771013742633 | 0.476302499782 | 0.335707071060 |
| H53 | H | 0.191894231073 | 0.916018639732 | 0.737301692676 |
| H54 | H | 0.811009986605 | 0.408244864710 | 0.313258402060 |
| H55 | H | 0.139929195226 | 0.034008753081 | 0.689517017530 |
| H56 | H | 0.867882867352 | 0.524700027166 | 0.360134764294 |
| H57 | H | 0.130930884900 | 0.937754825985 | 0.685875975631 |
| H58 | H | 0.877095542092 | 0.428528614038 | 0.362125010906 |
| H59 | H | 0.045719041872 | 0.020632478688 | 0.718069482457 |
| H60 | H | 0.958777040875 | 0.513886739929 | 0.328064000478 |
| H61 | H | 0.067142235963 | 0.933052160708 | 0.735056066134 |
| H62 | H | 0.936727058939 | 0.425861937192 | 0.311858439169 |
| H63 | H | 0.120679204923 | 0.142334529034 | 0.736887908919 |
| H64 | H | 0.882195207249 | 0.633942673079 | 0.311344712448 |
| H65 | H | 0.217704056322 | 0.243389176056 | 0.753480898872 |
| H66 | H | 0.785954489604 | 0.733612578253 | 0.293926972593 |
| H67 | H | 0.232547331951 | 0.296972338092 | 0.700215790064 |
| H68 | H | 0.771428162518 | 0.794631050305 | 0.345265679978 |
| H69 | H | 0.243044996338 | 0.201247797352 | 0.695122848564 |
| H70 | H | 0.758698267752 | 0.700280161962 | 0.352619112582 |
| H71 | H | 0.180978965816 | 0.267381264549 | 0.655246537956 |
| H72 | H | 0.821185193133 | 0.768635433140 | 0.391599119710 |

|      |   |                |                |                |
|------|---|----------------|----------------|----------------|
| H73  | H | 0.187109746272 | 0.366218731155 | 0.747252556614 |
| H74  | H | 0.817036216942 | 0.855276294581 | 0.297880577662 |
| H75  | H | 0.062576296472 | 0.386224598885 | 0.768235011218 |
| H76  | H | 0.938684940036 | 0.879405058760 | 0.274569671098 |
| H77  | H | 0.166728049983 | 0.488750685799 | 0.750897911720 |
| H78  | H | 0.839765876817 | 0.980005035362 | 0.301752028891 |
| H79  | H | 0.096686100973 | 0.451586652653 | 0.814786357097 |
| H80  | H | 0.881947721241 | 0.946581397659 | 0.230158250293 |
| H81  | H | 0.168932150082 | 0.417798260231 | 0.804431842542 |
| H82  | H | 0.815819002300 | 0.912156082690 | 0.248920505166 |
| H83  | H | 0.073951909819 | 0.555185936254 | 0.731976128930 |
| H84  | H | 0.938173276025 | 0.042338234717 | 0.310744832617 |
| H85  | H | 0.105115399470 | 0.594695006770 | 0.768777454517 |
| H86  | H | 0.895109591906 | 0.084914614299 | 0.278479675342 |
| H87  | H | 0.039405483929 | 0.537812143648 | 0.771365430000 |
| H88  | H | 0.957624898857 | 0.027813845236 | 0.268001947409 |
| H89  | H | 0.212719084269 | 0.544937408293 | 0.809145128572 |
| H90  | H | 0.780583567295 | 0.047217610078 | 0.255809546894 |
| H91  | H | 0.178425771932 | 0.515818431892 | 0.847011031218 |
| H92  | H | 0.782815889280 | 0.013086660908 | 0.214185659638 |
| H93  | H | 0.141216119020 | 0.580466433348 | 0.820639016648 |
| H94  | H | 0.840827838748 | 0.072619265646 | 0.228666427311 |
| H95  | H | 0.130902736964 | 0.420416406572 | 0.686802540599 |
| H96  | H | 0.875892470176 | 0.913599038201 | 0.357421935059 |
| H97  | H | 0.011734751532 | 0.468037336969 | 0.662359135822 |
| H98  | H | 0.995813525321 | 0.959327692151 | 0.380432140780 |
| H99  | H | 0.127392444277 | 0.422184841877 | 0.628255014866 |
| H100 | H | 0.878431488770 | 0.922455084385 | 0.414732411259 |
| H101 | H | 0.047625463566 | 0.364970278576 | 0.591784433808 |
| H102 | H | 0.952663305742 | 0.869531567858 | 0.454673430574 |
| H103 | H | 0.080335769099 | 0.442618769712 | 0.572068518467 |
| H104 | H | 0.923293892412 | 0.953246895703 | 0.470351146040 |
| H105 | H | 0.007081521583 | 0.448891240849 | 0.590183608520 |
| H106 | H | 0.997592494122 | 0.951202886359 | 0.453317661753 |
| H107 | H | 0.116116100022 | 0.553098587360 | 0.605625799416 |
| H108 | H | 0.890822808542 | 0.056708793152 | 0.432435082022 |
| H109 | H | 0.118067426553 | 0.550702516544 | 0.650324784369 |
| H110 | H | 0.892534920232 | 0.046736031789 | 0.387964106135 |
| H111 | H | 0.048018379846 | 0.562215822468 | 0.628466019404 |
| H112 | H | 0.960842543588 | 0.059705670519 | 0.411235734367 |
| H113 | H | 0.076552985998 | 0.286391590287 | 0.671106830481 |
| H114 | H | 0.929286121247 | 0.778904858627 | 0.374908413953 |
| H115 | H | 0.977496449189 | 0.217400393230 | 0.634660477191 |
| H116 | H | 0.028588726682 | 0.711520883966 | 0.411843708756 |
| H117 | H | 0.068119725613 | 0.146072242480 | 0.650135554286 |
| H118 | H | 0.936414437829 | 0.638930719804 | 0.395417389926 |
| H119 | H | 0.003007745089 | 0.105635772579 | 0.668092797848 |
| H120 | H | 0.002433087337 | 0.598114146665 | 0.378778039695 |
| H121 | H | 0.054184967276 | 0.158834658162 | 0.693761097000 |
| H122 | H | 0.953287146347 | 0.651323261430 | 0.352136941004 |
| H123 | H | 0.990733418512 | 0.281182880200 | 0.720186663246 |
| H124 | H | 0.016057814407 | 0.770243953996 | 0.325140776401 |
| H125 | H | 0.870191436573 | 0.238778741324 | 0.739324192092 |
| H126 | H | 0.138735112473 | 0.726666757718 | 0.308940312368 |
| H127 | H | 0.947596844138 | 0.278727239215 | 0.780970634396 |
| H128 | H | 0.065380409063 | 0.759706894010 | 0.264046378937 |
| H129 | H | 0.954025459210 | 0.365277724760 | 0.761133239339 |
| H130 | H | 0.055556205091 | 0.848372453574 | 0.281434886405 |
| H131 | H | 0.896602943411 | 0.383126445668 | 0.810996952023 |
| H132 | H | 0.117856784271 | 0.864355518911 | 0.233849944877 |
| H133 | H | 0.848868369190 | 0.399044842457 | 0.776468058831 |
| H134 | H | 0.163357597699 | 0.881218812565 | 0.269203181879 |
| H135 | H | 0.793461091096 | 0.334327470159 | 0.818416383925 |

|      |   |                |                |                |
|------|---|----------------|----------------|----------------|
| H136 | H | 0.223684794381 | 0.815826625589 | 0.230745519996 |
| H137 | H | 0.801132635813 | 0.273659843229 | 0.783907981658 |
| H138 | H | 0.208651531038 | 0.751541032541 | 0.262910303103 |
| H139 | H | 0.900206476507 | 0.255666027539 | 0.832613333555 |
| H140 | H | 0.115134760534 | 0.738952703929 | 0.211898733518 |
| H141 | H | 0.742006604689 | 0.212791475944 | 0.829770364305 |
| H142 | H | 0.276413862680 | 0.710030879130 | 0.209690773428 |
| H143 | H | 0.755072330454 | 0.118248171908 | 0.835098342551 |
| H144 | H | 0.267092777462 | 0.616025117088 | 0.200071268877 |
| H145 | H | 0.910315411223 | 0.144811892571 | 0.855100571738 |
| H146 | H | 0.107309681896 | 0.629195404620 | 0.187358692859 |
| H147 | H | 0.847208602309 | 0.092745534565 | 0.864431562333 |
| H148 | H | 0.172185054148 | 0.587314301821 | 0.172090318944 |
| H149 | H | 0.923751073765 | 0.410237649518 | 0.702640609792 |
| H150 | H | 0.079178664072 | 0.898376600447 | 0.341966773424 |
| H151 | H | 0.806173626750 | 0.474930267195 | 0.701090043643 |
| H152 | H | 0.192933074555 | 0.969316492475 | 0.343284281513 |
| H153 | H | 0.903964335016 | 0.492749079059 | 0.647687111766 |
| H154 | H | 0.097523066853 | 0.982916128183 | 0.398338757829 |
| H155 | H | 0.840904060360 | 0.552232516384 | 0.655179982957 |
| H156 | H | 0.155529095525 | 0.047532060143 | 0.387806706527 |
| H157 | H | 0.927979922568 | 0.596325285803 | 0.680976513214 |
| H158 | H | 0.067534815712 | 0.083645693681 | 0.364367315886 |
| H159 | H | 0.876729335010 | 0.357232591298 | 0.640368271685 |
| H160 | H | 0.130874233716 | 0.851705357289 | 0.408012024205 |
| H161 | H | 0.774866250242 | 0.356407422261 | 0.594615516049 |
| H162 | H | 0.245855115732 | 0.864727358945 | 0.445673034966 |
| H163 | H | 0.873805317350 | 0.240626358492 | 0.607668258318 |
| H164 | H | 0.135774880955 | 0.766444173320 | 0.456831480086 |
| H165 | H | 0.819414232697 | 0.237284316201 | 0.574634826385 |
| H166 | H | 0.205137363335 | 0.760195782695 | 0.480191003966 |
| H167 | H | 0.944630772786 | 0.240576711945 | 0.564592994439 |
| H168 | H | 0.071101905827 | 0.831149945649 | 0.486895318681 |
| H169 | H | 0.956224550418 | 0.316435653447 | 0.537469829818 |
| H170 | H | 0.086012331583 | 0.912798124512 | 0.509017513924 |
| H171 | H | 0.811658481900 | 0.238137777927 | 0.664985292092 |
| H172 | H | 0.195123463547 | 0.740647509949 | 0.381564819375 |
| H173 | H | 0.712583692696 | 0.139923916176 | 0.656841326675 |
| H174 | H | 0.293039284367 | 0.639359394648 | 0.391624744701 |
| H175 | H | 0.802049605268 | 0.130321833842 | 0.697285945902 |
| H176 | H | 0.203800820137 | 0.624012566391 | 0.351466180756 |
| H177 | H | 0.768988629651 | 0.198962269120 | 0.722600335868 |
| H178 | H | 0.235602376933 | 0.691238475515 | 0.324943522491 |
| H179 | H | 0.672925758034 | 0.168886323802 | 0.754595809227 |
| H180 | H | 0.331859923655 | 0.662375587558 | 0.293630268937 |
| H181 | H | 0.760956391763 | 0.007362050797 | 0.692569319510 |
| H182 | H | 0.247435367814 | 0.501332397528 | 0.357505958128 |
| H183 | H | 0.610498439414 | 0.070551878362 | 0.779817517646 |
| H184 | H | 0.395712742101 | 0.564210961692 | 0.269449146252 |
| H185 | H | 0.697587899979 | 0.907677846018 | 0.717962634814 |
| H186 | H | 0.314272442808 | 0.403192411879 | 0.333930713873 |
| H187 | H | 0.622588308866 | 0.939812436174 | 0.761259042883 |
| H188 | H | 0.388718893379 | 0.435655224328 | 0.290051964342 |
| H189 | H | 0.718171013611 | 0.312060496721 | 0.702954798217 |
| H190 | H | 0.286382940556 | 0.807023929044 | 0.342974785853 |
| H191 | H | 0.593353291904 | 0.294434899178 | 0.722454970107 |
| H192 | H | 0.411757028960 | 0.797055473295 | 0.323782546160 |
| H193 | H | 0.666414974658 | 0.438854313489 | 0.716820965385 |
| H194 | H | 0.327532682388 | 0.931387066620 | 0.329452605318 |
| H195 | H | 0.594801601436 | 0.427254939376 | 0.735641575761 |
| H196 | H | 0.401956268856 | 0.934038348995 | 0.313772393102 |
| H197 | H | 0.718123830554 | 0.475822339217 | 0.764721920235 |
| H198 | H | 0.293853761767 | 0.974157359096 | 0.277475808172 |

|      |   |                |                |                |
|------|---|----------------|----------------|----------------|
| H199 | H | 0.717457432925 | 0.422647860237 | 0.802115484290 |
| H200 | H | 0.303939597045 | 0.923946385466 | 0.239583918249 |
| H201 | H | 0.657407167391 | 0.375613941337 | 0.648956643850 |
| H202 | H | 0.342991019402 | 0.878294917283 | 0.397117444917 |
| H203 | H | 0.540010261644 | 0.429272262515 | 0.624574748521 |
| H204 | H | 0.458455902265 | 0.932250893796 | 0.422972000161 |
| H205 | H | 0.660172018080 | 0.394415915034 | 0.591442321770 |
| H206 | H | 0.339743295591 | 0.890111552001 | 0.456247033749 |
| H207 | H | 0.617562639046 | 0.454305002725 | 0.539010900019 |
| H208 | H | 0.381014530527 | 0.951584015995 | 0.508577294163 |
| H209 | H | 0.544141679343 | 0.451149000679 | 0.556509281281 |
| H210 | H | 0.454242012869 | 0.951570959737 | 0.490897671882 |
| H211 | H | 0.583211142343 | 0.367958847968 | 0.547835013114 |
| H212 | H | 0.417447006203 | 0.866699092821 | 0.499432811025 |
| H213 | H | 0.664169013252 | 0.532746165313 | 0.585157078046 |
| H214 | H | 0.331018567764 | 0.027570859817 | 0.463852436457 |
| H215 | H | 0.655352420308 | 0.507779222619 | 0.627624413839 |
| H216 | H | 0.338928896617 | 0.005554226039 | 0.420993074778 |
| H217 | H | 0.591937091267 | 0.539765422947 | 0.604034911918 |
| H218 | H | 0.402083692654 | 0.039861619525 | 0.444250237995 |
| H219 | H | 0.622022243134 | 0.260209183408 | 0.611017985991 |
| H220 | H | 0.380871470533 | 0.759357257969 | 0.436259424885 |
| H221 | H | 0.534233639294 | 0.193579122532 | 0.567175337314 |
| H222 | H | 0.472803422731 | 0.697999228117 | 0.479501557439 |
| H223 | H | 0.637489632457 | 0.146051414384 | 0.577432338081 |
| H224 | H | 0.370025466706 | 0.646935906913 | 0.472623560265 |
| H225 | H | 0.622471203809 | 0.131887182144 | 0.620699543650 |
| H226 | H | 0.381193792629 | 0.631311039119 | 0.429111082457 |
| H227 | H | 0.536165905695 | 0.205752686787 | 0.656672903498 |
| H228 | H | 0.464836072669 | 0.708637110250 | 0.390108323511 |
| H229 | H | 0.427788302201 | 0.115625283134 | 0.662066749078 |
| H230 | H | 0.575525361779 | 0.623479902612 | 0.383621155949 |
| H231 | H | 0.490779220971 | 0.223437360545 | 0.710813465606 |
| H232 | H | 0.501977025523 | 0.720952230559 | 0.335230489897 |
| H233 | H | 0.429537350466 | 0.167558753279 | 0.721998299429 |
| H234 | H | 0.567912812235 | 0.674164042909 | 0.323032743837 |
| H235 | H | 0.548236062837 | 0.102960605071 | 0.694868091075 |
| H236 | H | 0.458158698571 | 0.595173042861 | 0.353884484468 |
| H237 | H | 0.536773931306 | 0.122089520862 | 0.737441687678 |
| H238 | H | 0.465056984181 | 0.610830150284 | 0.310827430410 |
| H239 | H | 0.453589767140 | 0.019224240878 | 0.695879566463 |
| H240 | H | 0.558113136773 | 0.524041845195 | 0.353460124267 |
| H241 | H | 0.517605664901 | 0.988537400682 | 0.718717612501 |
| H242 | H | 0.497561006933 | 0.483691751400 | 0.330825296636 |
| H243 | H | 0.468094669836 | 0.050484816053 | 0.769965027622 |
| H244 | H | 0.544576999995 | 0.552856096337 | 0.279469386564 |
| H245 | H | 0.382315353942 | 0.949798697969 | 0.706897338250 |
| H246 | H | 0.623685412873 | 0.445937517796 | 0.342823355170 |
| H247 | H | 0.331993690529 | 0.920497610321 | 0.737823300914 |
| H248 | H | 0.674280892775 | 0.414532222901 | 0.312383146028 |
| H249 | H | 0.402104490108 | 0.020486031416 | 0.803958202836 |
| H250 | H | 0.611655168690 | 0.515195258682 | 0.245273407147 |
| H251 | H | 0.338615610338 | 0.964311109612 | 0.792959699311 |
| H252 | H | 0.669781481683 | 0.454617138362 | 0.256933230088 |
| H253 | H | 0.440885450419 | 0.299613528174 | 0.636859434152 |
| H254 | H | 0.557896330513 | 0.806700795780 | 0.407234629245 |
| H255 | H | 0.334991102685 | 0.352451695090 | 0.670143337259 |
| H256 | H | 0.662574586382 | 0.863172866284 | 0.374972992227 |
| H257 | H | 0.393590524073 | 0.397729627218 | 0.603818662758 |
| H258 | H | 0.598209299518 | 0.899782187279 | 0.440416297864 |
| H259 | H | 0.330219901558 | 0.442678068482 | 0.620937229067 |
| H260 | H | 0.666451300273 | 0.944651153401 | 0.430173411924 |
| H261 | H | 0.454846898015 | 0.431614675098 | 0.654822119771 |

|      |   |                |                |                |
|------|---|----------------|----------------|----------------|
| H262 | H | 0.553185016129 | 0.945659372093 | 0.385231496389 |
| H263 | H | 0.451888970942 | 0.509799459137 | 0.603200698283 |
| H264 | H | 0.535896092688 | 0.007331861180 | 0.440207836555 |
| H265 | H | 0.460971242237 | 0.566190304741 | 0.639495661702 |
| H266 | H | 0.539875189606 | 0.074653994564 | 0.407737174952 |
| H267 | H | 0.389463120155 | 0.560143578638 | 0.618887229450 |
| H268 | H | 0.602368828472 | 0.061044752105 | 0.435492969698 |
| H269 | H | 0.413455275954 | 0.526450056161 | 0.695132037118 |
| H270 | H | 0.607267500804 | 0.050966051325 | 0.356569360676 |
| H271 | H | 0.377856695202 | 0.439827758351 | 0.699063049695 |
| H272 | H | 0.647266750267 | 0.967573308490 | 0.352508695364 |
| H273 | H | 0.340205280244 | 0.512932143732 | 0.677401193941 |
| H274 | H | 0.671823049745 | 0.034272613928 | 0.382412908523 |
| H275 | H | 0.204790195943 | 0.267911537552 | 0.587081028601 |
| H276 | H | 0.793036767901 | 0.768877482199 | 0.455657132609 |
| H277 | H | 0.236649897652 | 0.156834697373 | 0.542591460047 |
| H278 | H | 0.761209366477 | 0.675776217414 | 0.506052868943 |
| H279 | H | 0.246754241259 | 0.251273839844 | 0.533065714306 |
| H280 | H | 0.748069447578 | 0.771248909587 | 0.509511543030 |
| H281 | H | 0.341793713084 | 0.144500813112 | 0.560699589062 |
| H282 | H | 0.655406528389 | 0.656276567821 | 0.486481850459 |
| H283 | H | 0.348156442290 | 0.207692951211 | 0.526698100832 |
| H284 | H | 0.647891411713 | 0.722979033512 | 0.518955911900 |
| H285 | H | 0.391653872943 | 0.244279466020 | 0.589525486601 |
| H286 | H | 0.605077709093 | 0.752996403746 | 0.455267859466 |
| H287 | H | 0.355292345248 | 0.312383884205 | 0.564167278303 |
| H288 | H | 0.641798709352 | 0.823530061019 | 0.478903612957 |
| H289 | H | 0.292061178946 | 0.168734975489 | 0.640528207486 |
| H290 | H | 0.709011344764 | 0.678725136921 | 0.401570746125 |
| H291 | H | 0.251473698117 | 0.086843993290 | 0.678745981460 |
| H292 | H | 0.737390268636 | 0.585857949561 | 0.367377468589 |
| H293 | H | 0.192528304966 | 0.062226758893 | 0.649496935176 |
| H294 | H | 0.804550541597 | 0.571798891204 | 0.392229084049 |
| H295 | H | 0.322340337355 | 0.051444404868 | 0.606847254391 |
| H296 | H | 0.667809346992 | 0.561895706653 | 0.434582648580 |
| H297 | H | 0.324316577542 | 0.903753654298 | 0.594864425456 |
| H298 | H | 0.680012018104 | 0.414606389699 | 0.457122113975 |
| H299 | H | 0.436595145937 | 0.996557331311 | 0.610093921869 |
| H300 | H | 0.563710357641 | 0.494455421694 | 0.437053910531 |
| H301 | H | 0.413135287896 | 0.064150606924 | 0.570708268127 |
| H302 | H | 0.581898732756 | 0.570933874898 | 0.473808465795 |
| H303 | H | 0.462115758738 | 0.869082386259 | 0.597027821908 |
| H304 | H | 0.542826409021 | 0.368258977715 | 0.452454476532 |
| H305 | H | 0.479939476981 | 0.924056312087 | 0.561420874370 |
| H306 | H | 0.521659558948 | 0.424055206824 | 0.487210153082 |
| H307 | H | 0.413560473424 | 0.868408789905 | 0.560583396039 |
| H308 | H | 0.590292748172 | 0.373114646646 | 0.489244010711 |
| H309 | H | 0.365944284307 | 0.800514985405 | 0.696957939170 |
| H310 | H | 0.644672919211 | 0.294836210776 | 0.357591291479 |
| H311 | H | 0.427370458589 | 0.691171115078 | 0.649879214652 |
| H312 | H | 0.583042424257 | 0.190063046574 | 0.406432379838 |
| H313 | H | 0.385833491516 | 0.671807196708 | 0.687454295474 |
| H314 | H | 0.626370897281 | 0.167138556497 | 0.370304366483 |
| H315 | H | 0.326057742578 | 0.657756728623 | 0.627613299196 |
| H316 | H | 0.682659664600 | 0.162002058981 | 0.431824576183 |
| H317 | H | 0.291257302173 | 0.707454912579 | 0.660624918031 |
| H318 | H | 0.719823763168 | 0.206948717053 | 0.398249184746 |
| H319 | H | 0.353835723749 | 0.771316179984 | 0.599264393516 |
| H320 | H | 0.652810805753 | 0.278767478260 | 0.456153874871 |
| H321 | H | 0.286640625942 | 0.801390769218 | 0.619683179428 |
| H322 | H | 0.720733012555 | 0.307479310269 | 0.436070055459 |
| H323 | H | 0.441723718127 | 0.797001805341 | 0.733024527021 |
| H324 | H | 0.570814250174 | 0.286985361237 | 0.321480385946 |

|      |   |                |                |                |
|------|---|----------------|----------------|----------------|
| H325 | H | 0.553071594068 | 0.873989813506 | 0.718952274853 |
| H326 | H | 0.462009022713 | 0.373046142568 | 0.334282208658 |
| H327 | H | 0.528393987430 | 0.755142783245 | 0.772025089028 |
| H328 | H | 0.484921100209 | 0.254981734952 | 0.280885480072 |
| H329 | H | 0.593568423049 | 0.810157627753 | 0.770050689768 |
| H330 | H | 0.424184914778 | 0.317438749260 | 0.280925771801 |
| H331 | H | 0.526501805350 | 0.924975316132 | 0.778091012502 |
| H332 | H | 0.495720034878 | 0.424087896708 | 0.273450852065 |
| H333 | H | 0.464195391833 | 0.865459203215 | 0.782539981100 |
| H334 | H | 0.557781175373 | 0.363540676473 | 0.276418355656 |
| H335 | H | 0.520743288527 | 0.677161329696 | 0.716280520392 |
| H336 | H | 0.486562955909 | 0.173716865703 | 0.336173969828 |
| H337 | H | 0.640626376640 | 0.638973745360 | 0.702906258341 |
| H338 | H | 0.361895230258 | 0.144844889362 | 0.345987634628 |
| H339 | H | 0.560272774164 | 0.548283633230 | 0.716058940156 |
| H340 | H | 0.438076990755 | 0.048755309238 | 0.332573175099 |
| H341 | H | 0.598015139265 | 0.523060885263 | 0.678447029947 |
| H342 | H | 0.395365085387 | 0.024484600126 | 0.368623917139 |
| H343 | H | 0.524578964118 | 0.563423145074 | 0.676348541740 |
| H344 | H | 0.471113940545 | 0.056954290738 | 0.373473008022 |
| H345 | H | 0.532750261757 | 0.707456174454 | 0.643337224002 |
| H346 | H | 0.469066910007 | 0.207222316747 | 0.406948443709 |
| H347 | H | 0.613766484475 | 0.673573958083 | 0.586431771978 |
| H348 | H | 0.384958377977 | 0.175275245773 | 0.462637178932 |
| H349 | H | 0.493972801074 | 0.756647377171 | 0.593850633913 |
| H350 | H | 0.505782696471 | 0.257825089596 | 0.457208199101 |
| H351 | H | 0.535915661339 | 0.763081938006 | 0.556540980160 |
| H352 | H | 0.462856966319 | 0.260319226310 | 0.494281477714 |
| H353 | H | 0.495139951788 | 0.615540011853 | 0.586042587071 |
| H354 | H | 0.504222720991 | 0.115672433314 | 0.462367407084 |
| H355 | H | 0.403164304905 | 0.687297903810 | 0.573457484944 |
| H356 | H | 0.596204779480 | 0.186830367526 | 0.475056890076 |
| H357 | H | 0.410873304722 | 0.617518114971 | 0.542605354270 |
| H358 | H | 0.589645479773 | 0.115432076214 | 0.505294386987 |
| H359 | H | 0.429705459187 | 0.710662621253 | 0.532813802553 |
| H360 | H | 0.570911335895 | 0.208003605877 | 0.516133197424 |
| H361 | H | 0.514312767201 | 0.567213254670 | 0.528066211005 |
| H362 | H | 0.486921018181 | 0.063519202152 | 0.519949797982 |
| H363 | H | 0.580997524561 | 0.605119946434 | 0.545820860356 |
| H364 | H | 0.419628736499 | 0.101137389391 | 0.502705560163 |
| H365 | H | 0.539230981769 | 0.655760063712 | 0.515281676279 |
| H366 | H | 0.461128167212 | 0.150797281360 | 0.533862622752 |
| H367 | H | 0.577288348530 | 0.827335185885 | 0.639599890244 |
| H368 | H | 0.428683268364 | 0.329465913974 | 0.411176402382 |
| H369 | H | 0.658921010665 | 0.921283428206 | 0.601819240817 |
| H370 | H | 0.347331740178 | 0.426567880317 | 0.447494238724 |
| H371 | H | 0.610923965903 | 0.935108536540 | 0.673731377748 |
| H372 | H | 0.397522253836 | 0.437382470340 | 0.375892578784 |
| H373 | H | 0.655824924140 | 0.002451419502 | 0.653430967060 |
| H374 | H | 0.353059897498 | 0.506031017842 | 0.395398168972 |
| H375 | H | 0.686304650262 | 0.793400949424 | 0.668081223693 |
| H376 | H | 0.322329721426 | 0.300701054770 | 0.380371169119 |
| H377 | H | 0.811753726995 | 0.833160716350 | 0.677295473569 |
| H378 | H | 0.199353400880 | 0.347121005678 | 0.367149896069 |
| H379 | H | 0.760537990045 | 0.752441300362 | 0.718146853933 |
| H380 | H | 0.256564354427 | 0.268050973396 | 0.327531274684 |
| H381 | H | 0.820194335863 | 0.701814487352 | 0.699116800320 |
| H382 | H | 0.189402987985 | 0.222438230415 | 0.341034032134 |
| H383 | H | 0.743807829146 | 0.686043135541 | 0.686317623520 |
| H384 | H | 0.260974552880 | 0.195863970048 | 0.357911509744 |
| H385 | H | 0.745292473654 | 0.695367248893 | 0.619586888540 |
| H386 | H | 0.256140672214 | 0.199788677162 | 0.423359522571 |
| H387 | H | 0.867525572026 | 0.671805606834 | 0.593290713022 |



|      |   |                |                |                |
|------|---|----------------|----------------|----------------|
| H388 | H | 0.132477900911 | 0.178834251632 | 0.445532147958 |
| H389 | H | 0.817274995804 | 0.614585080757 | 0.544746250300 |
| H390 | H | 0.176968936870 | 0.119199934292 | 0.495879164116 |
| H391 | H | 0.718060487309 | 0.601585610117 | 0.544086496653 |
| H392 | H | 0.277044843457 | 0.100424839897 | 0.496972914551 |
| H393 | H | 0.847364958016 | 0.534537632761 | 0.592693510402 |
| H394 | H | 0.146775989593 | 0.044657978270 | 0.448114353869 |
| H395 | H | 0.780599143515 | 0.502504877601 | 0.573085473794 |
| H396 | H | 0.214115515164 | 0.008014770689 | 0.465498369060 |
| H397 | H | 0.775536398388 | 0.550308539955 | 0.612143296192 |
| H398 | H | 0.217828032860 | 0.060099352570 | 0.427566610103 |
| H399 | H | 0.749647420165 | 0.802193163501 | 0.572532626646 |
| H400 | H | 0.251022122121 | 0.301244245531 | 0.474907552944 |
| H401 | H | 0.812341763128 | 0.847404994321 | 0.513541362782 |
| H402 | H | 0.184878461698 | 0.347194174815 | 0.532506552463 |
| H403 | H | 0.703802961591 | 0.879259874763 | 0.527385825392 |
| H404 | H | 0.294056650300 | 0.377599764352 | 0.520121641865 |
| H405 | H | 0.729988996558 | 0.941871670157 | 0.558172015358 |
| H406 | H | 0.270297576869 | 0.438087855485 | 0.487975867745 |
| H407 | H | 0.757039243643 | 0.896327910992 | 0.466825709568 |
| H408 | H | 0.248389820774 | 0.401144269477 | 0.580050350375 |
| H409 | H | 0.746979180504 | 0.068771156131 | 0.540846306155 |
| H410 | H | 0.247034028577 | 0.566306025786 | 0.502360653810 |
| H411 | H | 0.780876415120 | 0.987533157085 | 0.423349136610 |
| H412 | H | 0.230457958392 | 0.496894507273 | 0.622685126212 |
| H413 | H | 0.772747393342 | 0.161248195780 | 0.496935273538 |
| H414 | H | 0.228313695704 | 0.663144974389 | 0.545461727945 |
| H415 | H | 0.789841702876 | 0.112264252279 | 0.411309532478 |
| H416 | H | 0.219325300426 | 0.619626016634 | 0.632810879832 |
| H417 | H | 0.828044597108 | 0.913264345718 | 0.596802854390 |
| H418 | H | 0.182966736217 | 0.424377573757 | 0.449733506012 |
| H419 | H | 0.910990027340 | 0.029764699779 | 0.572681520829 |
| H420 | H | 0.097682632081 | 0.537994251369 | 0.471611274729 |
| H421 | H | 0.900641241878 | 0.080480214453 | 0.630248017615 |
| H422 | H | 0.097715587043 | 0.577447153869 | 0.412237836393 |
| H423 | H | 0.821278340983 | 0.961994028273 | 0.645295758834 |
| H424 | H | 0.181614663076 | 0.462131131697 | 0.399627141141 |
| H425 | H | 0.821061753491 | 0.110740676671 | 0.586553439463 |
| H426 | H | 0.177192879849 | 0.622611424784 | 0.452586451980 |
| H427 | H | 0.795358561124 | 0.115671794842 | 0.628566789139 |
| H428 | H | 0.201158371145 | 0.619640336976 | 0.410387227859 |
| H429 | H | 0.774579182353 | 0.038786463665 | 0.602854383940 |
| H430 | H | 0.226731876508 | 0.550625998281 | 0.439237575606 |
| H431 | H | 0.925831607137 | 0.859688982753 | 0.609519913998 |
| H432 | H | 0.083536574409 | 0.367154917214 | 0.430271688602 |
| H433 | H | 0.014417009473 | 0.800780765740 | 0.627359437063 |
| H434 | H | 0.987870462517 | 0.306361078940 | 0.420884074452 |
| H435 | H | 0.054034321626 | 0.885988175470 | 0.628549031523 |
| H436 | H | 0.951779539293 | 0.393936275815 | 0.418745693621 |
| H437 | H | 0.925449131545 | 0.923616500988 | 0.667518892035 |
| H438 | H | 0.076838001794 | 0.425454088626 | 0.377681186427 |
| H439 | H | 0.976029670541 | 0.910094456290 | 0.735907512187 |
| H440 | H | 0.025565416669 | 0.406241444110 | 0.309811779405 |
| H441 | H | 0.845486127457 | 0.939090409398 | 0.711741468703 |
| H442 | H | 0.157163318469 | 0.432497874880 | 0.332808885365 |
| H443 | H | 0.874122294846 | 0.949837101708 | 0.753263412183 |
| H444 | H | 0.128021416052 | 0.439162393478 | 0.291263119140 |
| H445 | H | 0.918248780015 | 0.845376330925 | 0.777814204223 |
| H446 | H | 0.071944673267 | 0.334032743831 | 0.269491658303 |
| H447 | H | 0.874707818873 | 0.700785694411 | 0.751291383018 |
| H448 | H | 0.117438647988 | 0.192029905694 | 0.297530526579 |
| H449 | H | 0.936201021966 | 0.636477093691 | 0.792226643562 |
| H450 | H | 0.052130831823 | 0.123516582463 | 0.261085683018 |

|      |   |                |                |                |
|------|---|----------------|----------------|----------------|
| H451 | H | 0.992987656060 | 0.783645617053 | 0.812993188784 |
| H452 | H | 0.996047723263 | 0.266927895614 | 0.234920349281 |
| H453 | H | 0.939964850600 | 0.733641558846 | 0.836727657788 |
| H454 | H | 0.049423749796 | 0.213822658798 | 0.212979642084 |
| H455 | H | 0.038914204742 | 0.667024755100 | 0.766838381490 |
| H456 | H | 0.950854968020 | 0.163667211998 | 0.286968859047 |
| H457 | H | 0.005605286762 | 0.743039102299 | 0.746698123983 |
| H458 | H | 0.987596606339 | 0.242426389344 | 0.302414182040 |
| H459 | H | 0.979684852980 | 0.652382801849 | 0.737159910759 |
| H460 | H | 0.011644146926 | 0.154384650972 | 0.316287125508 |
| H461 | H | 0.012836357901 | 0.624975067664 | 0.838899882847 |
| H462 | H | 0.977538453880 | 0.104888257113 | 0.212464476019 |
| H463 | H | 0.041143281398 | 0.706194794082 | 0.859146069776 |
| H464 | H | 0.946717111368 | 0.182888217450 | 0.191735070170 |
| H465 | H | 0.068201187650 | 0.681326202649 | 0.819067845974 |
| H466 | H | 0.922335520961 | 0.160409330263 | 0.232493871120 |
| H467 | H | 0.821390281368 | 0.630637272400 | 0.788783840959 |
| H468 | H | 0.164951339964 | 0.117371147563 | 0.258589993304 |
| H469 | H | 0.767981155008 | 0.718731833892 | 0.844386599601 |
| H470 | H | 0.217820158254 | 0.207052716297 | 0.203298524057 |
| H471 | H | 0.711340677506 | 0.578699806257 | 0.814677831324 |
| H472 | H | 0.283922637291 | 0.079839786645 | 0.238605494027 |
| H473 | H | 0.662407580878 | 0.733481484897 | 0.801566589906 |
| H474 | H | 0.293941556215 | 0.245809041782 | 0.251711558641 |
| H475 | H | 0.709718243540 | 0.685715095863 | 0.773082090810 |
| H476 | H | 0.266683894625 | 0.178037602073 | 0.278585577669 |
| H477 | H | 0.683646027223 | 0.603858884443 | 0.874689008979 |
| H478 | H | 0.314667553763 | 0.104738082494 | 0.178797531354 |
| H479 | H | 0.620661118777 | 0.621020810981 | 0.848331826520 |
| H480 | H | 0.373550956633 | 0.129209511960 | 0.206980555860 |
| H481 | H | 0.664212582818 | 0.696078651186 | 0.864104114530 |
| H482 | H | 0.327075648722 | 0.198512284667 | 0.188536890499 |
| H483 | H | 0.636749150923 | 0.581270772581 | 0.769318195484 |
| H484 | H | 0.366587850273 | 0.114108814364 | 0.281630497599 |
| H485 | H | 0.601251228951 | 0.665289238141 | 0.757712593564 |
| H486 | H | 0.369218605530 | 0.206712010587 | 0.296364754412 |
| H487 | H | 0.586882275123 | 0.626470732645 | 0.797314616257 |
| H488 | H | 0.399644468483 | 0.183570530097 | 0.256523901525 |
| H489 | H | 0.789377222624 | 0.678093274777 | 0.895303751492 |
| H490 | H | 0.195126431643 | 0.169602570495 | 0.154487376908 |
| H491 | H | 0.831973868448 | 0.522780737592 | 0.899131243834 |
| H492 | H | 0.167869680152 | 0.009983663666 | 0.146344694129 |
| H493 | H | 0.894432600498 | 0.550339784281 | 0.948545428940 |
| H494 | H | 0.099987094630 | 0.033357965345 | 0.100296254146 |
| H495 | H | 0.868003217955 | 0.713847336758 | 0.935045598307 |
| H496 | H | 0.121864766176 | 0.198897129322 | 0.110569204142 |
| H497 | H | 0.838464721010 | 0.661781912671 | 0.968514775146 |
| H498 | H | 0.147687153971 | 0.145384170044 | 0.076795517603 |
| H499 | H | 0.979758416198 | 0.604046918721 | 0.916967702047 |
| H500 | H | 0.013611431660 | 0.081951782650 | 0.132314654355 |
| H501 | H | 0.928964848162 | 0.647725594501 | 0.888153306766 |
| H502 | H | 0.062317977731 | 0.133644615987 | 0.159123828729 |
| H503 | H | 0.935609403373 | 0.550312811765 | 0.889030166021 |
| H504 | H | 0.062654943880 | 0.036357196285 | 0.161267014902 |
| H505 | H | 0.943295302992 | 0.640648475044 | 0.992021496864 |
| H506 | H | 0.038866211775 | 0.119754164255 | 0.058720013069 |
| H507 | H | 0.925259145948 | 0.735733610061 | 0.988668992137 |
| H508 | H | 0.057836115194 | 0.214844821938 | 0.058622839278 |
| H509 | H | 0.973876138968 | 0.694305447433 | 0.959015831608 |
| H510 | H | 0.013884442396 | 0.177791180398 | 0.091579471718 |
| H511 | H | 0.678870451700 | 0.492989460197 | 0.970177411882 |
| H512 | H | 0.318920320708 | 0.036715184061 | 0.073996386782 |
| H513 | H | 0.731230278216 | 0.385944254885 | 0.013401271435 |

|      |   |                |                |                |
|------|---|----------------|----------------|----------------|
| H514 | H | 0.312447253649 | 0.905964678706 | 0.037672554593 |
| H515 | H | 0.688478391968 | 0.370068981669 | 0.975964389489 |
| H516 | H | 0.336815194300 | 0.908514011487 | 0.080285876356 |
| H517 | H | 0.825050557210 | 0.371185447788 | 0.986353409627 |
| H518 | H | 0.210017158998 | 0.872821310848 | 0.052194130569 |
| H519 | H | 0.782189166940 | 0.313545441204 | 0.959007334135 |
| H520 | H | 0.251027430964 | 0.822357217696 | 0.083197841610 |
| H521 | H | 0.845576238992 | 0.434536375344 | 0.936123213020 |
| H522 | H | 0.164751177841 | 0.923721939015 | 0.101271345829 |
| H523 | H | 0.775467018856 | 0.408980285274 | 0.916246994778 |
| H524 | H | 0.232591995933 | 0.913234036259 | 0.126311085154 |
| H525 | H | 0.827328092107 | 0.534496182985 | 0.003689120224 |
| H526 | H | 0.168593038720 | 0.018781371914 | 0.043670126420 |
| H527 | H | 0.781421749969 | 0.575266413741 | 0.068906831044 |
| H528 | H | 0.194535025800 | 0.066026399470 | 0.975419360049 |
| H529 | H | 0.854858436876 | 0.589956995495 | 0.051937054432 |
| H530 | H | 0.126312043294 | 0.076273798198 | 0.998465297802 |
| H531 | H | 0.835341361075 | 0.696242393763 | 0.088325755349 |
| H532 | H | 0.156847445912 | 0.193649308674 | 0.959088292508 |
| H533 | H | 0.776048628352 | 0.820282710132 | 0.052162782137 |
| H534 | H | 0.206992770818 | 0.305623355808 | 0.006519041925 |
| H535 | H | 0.743469323822 | 0.805796564051 | 0.111250008234 |
| H536 | H | 0.264651024263 | 0.294413234120 | 0.954512257783 |
| H537 | H | 0.785259846984 | 0.888642628732 | 0.105341414685 |
| H538 | H | 0.224486013929 | 0.380244170693 | 0.954828189803 |
| H539 | H | 0.820167171424 | 0.811218791100 | 0.125470244019 |
| H540 | H | 0.198152609452 | 0.305570868469 | 0.929201124665 |
| H541 | H | 0.913609337918 | 0.738415758551 | 0.064568450815 |
| H542 | H | 0.077788586023 | 0.232520940610 | 0.984395909084 |
| H543 | H | 0.977357983575 | 0.882323155793 | 0.068864068642 |
| H544 | H | 0.014050398483 | 0.375091785893 | 0.974581269516 |
| H545 | H | 0.018082250309 | 0.730366116336 | 0.094488644363 |
| H546 | H | 0.986860516308 | 0.223394017586 | 0.944072901116 |
| H547 | H | 0.939364906800 | 0.761995650023 | 0.124867194431 |
| H548 | H | 0.064086289771 | 0.272108919939 | 0.918912514537 |
| H549 | H | 0.102763078872 | 0.818388397862 | 0.085846406668 |
| H550 | H | 0.891821140197 | 0.288733636931 | 0.950840981506 |
| H551 | H | 0.090631255095 | 0.801371097744 | 0.129503121073 |
| H552 | H | 0.913402262322 | 0.292389096420 | 0.908023538025 |
| H553 | H | 0.065549847560 | 0.886030835981 | 0.110238195889 |
| H554 | H | 0.923410551328 | 0.372090955047 | 0.934584349693 |
| H555 | H | 0.998273140836 | 0.907073846764 | 0.017540472807 |
| H556 | H | 0.992450919465 | 0.398962968472 | 0.025601274545 |
| H557 | H | 0.026196373660 | 0.800690775626 | 0.966474701489 |
| H558 | H | 0.957282635404 | 0.288056358247 | 0.073384802493 |
| H559 | H | 0.054106259236 | 0.966426525175 | 0.973696503214 |
| H560 | H | 0.954271395231 | 0.457753739033 | 0.072989765511 |
| H561 | H | 0.067236838839 | 0.915666070840 | 0.936538400048 |
| H562 | H | 0.933143515755 | 0.405313070654 | 0.108410513884 |
| H563 | H | 0.221833950802 | 0.769141999018 | 0.991001405675 |
| H564 | H | 0.760743427692 | 0.290329769682 | 0.047815436597 |
| H565 | H | 0.261931375572 | 0.716130283072 | 0.930686816448 |
| H566 | H | 0.716601422716 | 0.211905767019 | 0.101990698021 |
| H567 | H | 0.211014158583 | 0.664202757107 | 0.955182781018 |
| H568 | H | 0.761127241331 | 0.169605038485 | 0.070692210993 |
| H569 | H | 0.179294189302 | 0.767698703471 | 0.896509592675 |
| H570 | H | 0.804136594067 | 0.232272539195 | 0.138795932836 |
| H571 | H | 0.157042864790 | 0.673341694234 | 0.901036834012 |
| H572 | H | 0.820565029353 | 0.143135060186 | 0.122947232064 |
| H573 | H | 0.081629395425 | 0.786277800362 | 0.920836802582 |
| H574 | H | 0.901399339309 | 0.256160857293 | 0.115927403970 |
| H575 | H | 0.086579603289 | 0.702757346918 | 0.944547187562 |
| H576 | H | 0.891880891952 | 0.190058910614 | 0.083004546276 |

|      |   |                |                |                |
|------|---|----------------|----------------|----------------|
| H577 | H | 0.312756492280 | 0.825203113100 | 0.980695324212 |
| H578 | H | 0.671281152795 | 0.338747822366 | 0.067675788038 |
| H579 | H | 0.306216763496 | 0.976583876271 | 0.964363587649 |
| H580 | H | 0.681293487871 | 0.484519056851 | 0.092825204004 |
| H581 | H | 0.372898523516 | 0.925575236145 | 0.970585885660 |
| H582 | H | 0.614777247105 | 0.430354258824 | 0.089614674626 |
| H583 | H | 0.319713555192 | 0.837755631068 | 0.904801775274 |
| H584 | H | 0.669930393240 | 0.319991096778 | 0.142373135298 |
| H585 | H | 0.362151303640 | 0.949140039533 | 0.856786625983 |
| H586 | H | 0.630390590095 | 0.407597016787 | 0.200128015160 |
| H587 | H | 0.379741612915 | 0.843906266424 | 0.817865198247 |
| H588 | H | 0.638313823038 | 0.292316140106 | 0.232658528013 |
| H589 | H | 0.420819915349 | 0.836935968137 | 0.856177532833 |
| H590 | H | 0.589264484985 | 0.287790464946 | 0.197813506928 |
| H591 | H | 0.231679071531 | 0.900745180946 | 0.886967161155 |
| H592 | H | 0.763879636501 | 0.386218209725 | 0.160812345066 |
| H593 | H | 0.174364152474 | 0.954531038380 | 0.824181681480 |
| H594 | H | 0.821402783508 | 0.449342725764 | 0.221953095644 |
| H595 | H | 0.119205655432 | 0.834014930116 | 0.868028464466 |
| H596 | H | 0.875962581686 | 0.329359339515 | 0.177605139181 |
| H597 | H | 0.078943547999 | 0.887429867318 | 0.838163768695 |
| H598 | H | 0.917392703284 | 0.384672522818 | 0.206544981914 |
| H599 | H | 0.207448195421 | 0.748841853965 | 0.843785546579 |
| H600 | H | 0.792059148029 | 0.242837121507 | 0.203138371010 |
| H601 | H | 0.079960247769 | 0.865898860472 | 0.780734923198 |
| H602 | H | 0.917548880348 | 0.366617271765 | 0.264667838206 |
| H603 | H | 0.235688176480 | 0.671330585562 | 0.795451452018 |
| H604 | H | 0.763362653310 | 0.169283665047 | 0.252640508599 |
| H605 | H | 0.108317904145 | 0.789267563231 | 0.732373319644 |
| H606 | H | 0.890391831249 | 0.291862717559 | 0.314099713623 |
| H607 | H | 0.166608470911 | 0.689381938124 | 0.714566173412 |
| H608 | H | 0.835163569352 | 0.190379459704 | 0.332886436654 |
| H609 | H | 0.215767390555 | 0.053077553440 | 0.859621246188 |
| H610 | H | 0.778164156017 | 0.547949639496 | 0.188974956458 |
| H611 | H | 0.156327480814 | 0.068676200125 | 0.924963983733 |
| H612 | H | 0.825668121722 | 0.570097649206 | 0.122003722412 |
| H613 | H | 0.271477022855 | 0.081195388330 | 0.915379507928 |
| H614 | H | 0.719590445631 | 0.599125436900 | 0.141458505246 |
| H615 | H | 0.239831966583 | 0.158932442606 | 0.935831516684 |
| H616 | H | 0.753584784897 | 0.675025675991 | 0.121145814270 |
| H617 | H | 0.255421097292 | 0.163654284146 | 0.892544680258 |
| H618 | H | 0.748865492911 | 0.674174763708 | 0.165828076394 |
| H619 | H | 0.121193397063 | 0.130596272322 | 0.847281964925 |
| H620 | H | 0.884170071425 | 0.619361701697 | 0.199395266900 |
| H621 | H | 0.086772444997 | 0.278766121572 | 0.872727530049 |
| H622 | H | 0.927867357455 | 0.761766232599 | 0.171948864537 |
| H623 | H | 0.105371337001 | 0.227580901549 | 0.800370142805 |
| H624 | H | 0.914328510648 | 0.717669608230 | 0.245781405751 |
| H625 | H | 0.091170149197 | 0.319008245832 | 0.814421478325 |
| H626 | H | 0.927849281426 | 0.806868856004 | 0.228890734301 |
| H627 | H | 0.169273252827 | 0.357747844892 | 0.862481304912 |
| H628 | H | 0.846512826250 | 0.848245970876 | 0.185512081888 |
| H629 | H | 0.244522720094 | 0.330723592313 | 0.854462079712 |
| H630 | H | 0.772478303476 | 0.819342324318 | 0.194786839851 |
| H631 | H | 0.958014645814 | 0.785614237943 | 0.551918495211 |
| H632 | H | 0.043091105823 | 0.544337968985 | 0.515722514995 |
| H633 | H | 0.004736998668 | 0.559656159088 | 0.484050744308 |
| H634 | H | 0.965418170630 | 0.954475406408 | 0.530134152236 |
| H635 | H | 0.014242570534 | 0.773320607378 | 0.530813460642 |
| H636 | H | 0.034854108063 | 0.023449702848 | 0.506153740449 |
| H637 | H | 0.009582922144 | 0.896092473252 | 0.543348687743 |
| H638 | H | 0.023623440137 | 0.140934913000 | 0.469148779438 |
| H639 | H | 0.068808733088 | 0.094657437834 | 0.515178993483 |

|      |   |                |                |                |
|------|---|----------------|----------------|----------------|
| H640 | H | 0.993996843497 | 0.282629018265 | 0.484629643636 |
| H641 | H | 0.057712624193 | 0.214264156200 | 0.468247953897 |
| H642 | H | 0.036067530472 | 0.341654411157 | 0.499902743189 |
| H643 | H | 0.578512487570 | 0.745958765190 | 0.209730965722 |
| H644 | H | 0.420009366472 | 0.511742947918 | 0.151580941355 |
| H645 | H | 0.486244618149 | 0.482614303817 | 0.152623018857 |
| H646 | H | 0.561464555381 | 0.923514030894 | 0.165198287092 |
| H647 | H | 0.517329199662 | 0.778240914204 | 0.194593042512 |
| H648 | H | 0.522183830587 | 0.025704123731 | 0.192698015655 |
| H649 | H | 0.566443227782 | 0.889800380712 | 0.200441606778 |
| H650 | H | 0.502353049452 | 0.156357139734 | 0.167993613068 |
| H651 | H | 0.510212928477 | 0.098445079920 | 0.212938590052 |
| H652 | H | 0.539411134366 | 0.354803881859 | 0.132170829707 |
| H653 | H | 0.496729448472 | 0.239186558267 | 0.178948453039 |
| H654 | H | 0.526871833685 | 0.385740542426 | 0.169447114792 |
| H655 | H | 0.726930251966 | 0.097694320941 | 0.919826514703 |
| H656 | H | 0.281851726578 | 0.535294456779 | 0.126090625962 |
| H657 | H | 0.773881778488 | 0.035212538326 | 0.912545766441 |
| H658 | H | 0.212512837598 | 0.526631653929 | 0.123897933555 |
| H659 | H | 0.248182450794 | 0.149927239037 | 0.822379036406 |
| H660 | H | 0.750726536978 | 0.648666145248 | 0.227662625417 |
| H661 | H | 0.281196229001 | 0.087015023432 | 0.805058463415 |
| H662 | H | 0.722129584274 | 0.587478754392 | 0.248462855213 |
| H663 | H | 0.330799123043 | 0.155016451399 | 0.848566768614 |
| H664 | H | 0.649138028386 | 0.640504451322 | 0.219586101277 |
| H665 | H | 0.348578120015 | 0.184460852888 | 0.885235761868 |
| H666 | H | 0.606407034213 | 0.643601369082 | 0.187959323305 |
| H667 | H | 0.295245819702 | 0.340591346176 | 0.745422344243 |
| H668 | H | 0.709296357877 | 0.836969792142 | 0.298102348050 |
| H669 | H | 0.295195859257 | 0.427965577343 | 0.751505583010 |
| H670 | H | 0.711926058434 | 0.923449352987 | 0.290269881768 |
| H671 | H | 0.228657512320 | 0.399053815462 | 0.666915572594 |
| H672 | H | 0.773772521574 | 0.899517551064 | 0.376825849817 |
| H673 | H | 0.239954253337 | 0.419530003386 | 0.704542096645 |
| H674 | H | 0.765274653141 | 0.917198448845 | 0.338793897627 |
| H675 | H | 0.219313977372 | 0.533472084884 | 0.676038817024 |
| H676 | H | 0.782913920346 | 0.029719562551 | 0.366890243612 |
| H677 | H | 0.257064683978 | 0.601802976960 | 0.687643908898 |
| H678 | H | 0.744375583900 | 0.098118691024 | 0.356991387816 |
| H679 | H | 0.317369404483 | 0.587165040340 | 0.733640547136 |
| H680 | H | 0.688496990992 | 0.084411039417 | 0.303383366204 |
| H681 | H | 0.271827738641 | 0.652950844209 | 0.730314864903 |
| H682 | H | 0.733461688405 | 0.147890475435 | 0.313015685760 |
| H683 | H | 0.378890007161 | 0.499534602484 | 0.760835383004 |
| H684 | H | 0.630590114990 | 0.995465653644 | 0.282383691868 |
| H685 | H | 0.326650036516 | 0.530371850606 | 0.782784594022 |
| H686 | H | 0.674778796185 | 0.007197200615 | 0.251973934470 |
| H687 | H | 0.671179390836 | 0.299954971820 | 0.820087933237 |
| H688 | H | 0.342662867703 | 0.801030383735 | 0.228723218261 |
| H689 | H | 0.711844468483 | 0.333514860863 | 0.848078736055 |
| H690 | H | 0.316031352093 | 0.838730885761 | 0.196429733924 |
| H691 | H | 0.896320975449 | 0.529846890203 | 0.774191847240 |
| H692 | H | 0.108826690132 | 0.018475025931 | 0.273385567392 |
| H693 | H | 0.888796350688 | 0.552515009285 | 0.735663574593 |
| H694 | H | 0.112584390646 | 0.044767227148 | 0.311569022695 |
| H695 | H | 0.737992962090 | 0.557788575045 | 0.723650359227 |
| H696 | H | 0.265257582208 | 0.056573231077 | 0.323036557876 |
| H697 | H | 0.790975304597 | 0.549747279579 | 0.750427712214 |
| H698 | H | 0.214461345797 | 0.040945520473 | 0.296084839204 |
| H699 | H | 0.725454418214 | 0.501290997105 | 0.670342634164 |
| H700 | H | 0.271782600379 | 0.010347456347 | 0.375754852488 |
| H701 | H | 0.704925568262 | 0.585028808876 | 0.665779817738 |
| H702 | H | 0.291740637721 | 0.093367394393 | 0.381999938205 |

|      |   |                |                |                |
|------|---|----------------|----------------|----------------|
| H703 | H | 0.019591712108 | 0.156429422428 | 0.570820354824 |
| H704 | H | 0.982083088512 | 0.733301082459 | 0.479394002024 |
| H705 | H | 0.989486998235 | 0.103366968420 | 0.595909257004 |
| H706 | H | 0.031464775313 | 0.681688628702 | 0.493920474130 |
| H707 | H | 0.545007320867 | 0.213161137966 | 0.793240949283 |
| H708 | H | 0.525735563438 | 0.810774814067 | 0.246856109709 |
| H709 | H | 0.583242312522 | 0.269901098187 | 0.774332595022 |
| H710 | H | 0.474995935141 | 0.775700000235 | 0.267266899696 |
| H711 | H | 0.492771818128 | 0.312232448234 | 0.755685106123 |
| H712 | H | 0.549345671232 | 0.830368298104 | 0.302648874250 |
| H713 | H | 0.491509607341 | 0.349452147397 | 0.720002076515 |
| H714 | H | 0.534263953790 | 0.848027191386 | 0.339501063103 |
| H715 | H | 0.473107557329 | 0.491084255987 | 0.786592270513 |
| H716 | H | 0.521714421241 | 0.986009627478 | 0.286490686062 |
| H717 | H | 0.465755921414 | 0.436932028706 | 0.755396104118 |
| H718 | H | 0.563457135017 | 0.935727145406 | 0.310333752222 |
| H719 | H | 0.307421776622 | 0.205433951921 | 0.753974828155 |
| H720 | H | 0.695189032076 | 0.699453914307 | 0.293921661755 |
| H721 | H | 0.336059866824 | 0.234413510023 | 0.721827295966 |
| H722 | H | 0.661053905786 | 0.742018129890 | 0.320972854145 |
| H723 | H | 0.124308136062 | 0.154258446498 | 0.563498817867 |
| H724 | H | 0.878135751103 | 0.687396322178 | 0.469839898166 |
| H725 | H | 0.101108308046 | 0.204274099775 | 0.533212517416 |
| H726 | H | 0.889463153627 | 0.744466008086 | 0.497876338709 |
| H727 | H | 0.078064600190 | 0.003238001829 | 0.623646323951 |
| H728 | H | 0.924138151308 | 0.516630129497 | 0.427270484138 |
| H729 | H | 0.137656960643 | 0.029320220948 | 0.608305463448 |
| H730 | H | 0.860419192172 | 0.545106376370 | 0.436698739465 |
| H731 | H | 0.238970910366 | 0.858353367538 | 0.676778551252 |
| H732 | H | 0.765624421252 | 0.357672181211 | 0.375207958471 |
| H733 | H | 0.197282049433 | 0.788405486993 | 0.682034246419 |
| H734 | H | 0.805617284888 | 0.287326945222 | 0.368329714289 |
| H735 | H | 0.253891653676 | 0.981917523607 | 0.521561495635 |
| H736 | H | 0.745852243238 | 0.543304108851 | 0.493448089681 |
| H737 | H | 0.312599617517 | 0.013145251061 | 0.539972185852 |
| H738 | H | 0.676968744180 | 0.533495475785 | 0.499805858953 |
| H739 | H | 0.348951934926 | 0.798984676521 | 0.759216793483 |
| H740 | H | 0.659844957350 | 0.280433190200 | 0.294761542838 |
| H741 | H | 0.383302196710 | 0.740020306417 | 0.780163878777 |
| H742 | H | 0.636627084695 | 0.201883565950 | 0.302128096053 |
| H743 | H | 0.258464583752 | 0.849683900697 | 0.768233598257 |
| H744 | H | 0.744190651829 | 0.343300879501 | 0.281606586912 |
| H745 | H | 0.258670991736 | 0.825394124830 | 0.729035587860 |
| H746 | H | 0.745134366951 | 0.323596880300 | 0.321420158055 |
| H747 | H | 0.467415831210 | 0.580483769807 | 0.748466006336 |
| H748 | H | 0.550821674980 | 0.076581847336 | 0.313941605916 |
| H749 | H | 0.477410199343 | 0.650018640828 | 0.769982162098 |
| H750 | H | 0.547298039864 | 0.145053437681 | 0.290854201414 |
| H751 | H | 0.509599379754 | 0.095417873817 | 0.822862959002 |
| H752 | H | 0.551392214586 | 0.595550018080 | 0.223982548652 |
| H753 | H | 0.499560205973 | 0.008575255990 | 0.824895006875 |
| H754 | H | 0.517443244370 | 0.517523481029 | 0.223335744463 |
| H755 | H | 0.509021389006 | 0.719009016901 | 0.823806430988 |
| H756 | H | 0.522505414161 | 0.205927210961 | 0.237938275025 |
| H757 | H | 0.441254812439 | 0.691836112350 | 0.821740168746 |
| H758 | H | 0.581735543466 | 0.160761755304 | 0.234361999720 |
| H759 | H | 0.576651424387 | 0.772205863113 | 0.914219251275 |
| H760 | H | 0.443332227004 | 0.348653228176 | 0.147946152267 |
| H761 | H | 0.583217290964 | 0.792314704158 | 0.875403620786 |
| H762 | H | 0.390834606961 | 0.330080545753 | 0.173613188694 |
| H763 | H | 0.126827441193 | 0.696519328907 | 0.658327690767 |
| H764 | H | 0.878177860516 | 0.194361658277 | 0.388673318882 |
| H765 | H | 0.093048604013 | 0.758807073368 | 0.678849170246 |

|      |   |                |                |                |
|------|---|----------------|----------------|----------------|
| H766 | H | 0.910359574205 | 0.257626873327 | 0.368131855741 |
| H767 | H | 0.932150941292 | 0.697717992336 | 0.644025248405 |
| H768 | H | 0.039560580148 | 0.171750219248 | 0.410391364801 |
| H769 | H | 0.950919667842 | 0.710970967469 | 0.679939709462 |
| H770 | H | 0.062269675972 | 0.205896792945 | 0.376326789034 |
| H771 | H | 0.894319816487 | 0.525298185140 | 0.828956645240 |
| H772 | H | 0.116346033204 | 0.006045458119 | 0.219992595677 |
| H773 | H | 0.955637531458 | 0.482887001293 | 0.829292321001 |
| H774 | H | 0.054356299206 | 0.965680398118 | 0.221115951793 |
| H775 | H | 0.692049079335 | 0.457780206177 | 0.853585832910 |
| H776 | H | 0.324488196349 | 0.965198394528 | 0.178312161826 |
| H777 | H | 0.762380133395 | 0.471344484548 | 0.849298136181 |
| H778 | H | 0.256891560812 | 0.966141682914 | 0.190584119341 |
| H779 | H | 0.888562291862 | 0.448323338578 | 0.012887770250 |
| H780 | H | 0.109017748765 | 0.927219355079 | 0.037943627530 |
| H781 | H | 0.942923149724 | 0.497305682823 | 0.001695954549 |
| H782 | H | 0.058971965186 | 0.983525418684 | 0.048476327784 |
| H783 | H | 0.062505974613 | 0.468668782021 | 0.004870435332 |
| H784 | H | 0.942518833906 | 0.004857842254 | 0.036619656804 |
| H785 | H | 0.043254158862 | 0.516740379992 | 0.036096613029 |
| H786 | H | 0.990083589503 | 0.046395476855 | 0.013325709437 |
| H787 | H | 0.955910831753 | 0.620793892855 | 0.084523901746 |
| H788 | H | 0.018015784061 | 0.109922392499 | 0.963369495877 |
| H789 | H | 0.983539194289 | 0.653750900534 | 0.051690204852 |
| H790 | H | 0.988373331640 | 0.155845801216 | 0.992780769033 |
| H791 | H | 0.948492718256 | 0.537374812900 | 0.133521839244 |
| H792 | H | 0.048273769843 | 0.047990539925 | 0.909057619253 |
| H793 | H | 0.992294031445 | 0.599975182188 | 0.144521978583 |
| H794 | H | 0.016562822502 | 0.120334924388 | 0.897593397694 |
| H795 | H | 0.104179720661 | 0.541642805593 | 0.084463588870 |
| H796 | H | 0.875584671798 | 0.075314977511 | 0.923444510937 |
| H797 | H | 0.039052086327 | 0.559465592691 | 0.093801444158 |
| H798 | H | 0.941587430734 | 0.097513860476 | 0.925353152768 |
| H799 | H | 0.314193450610 | 0.753102077547 | 0.049943681520 |
| H800 | H | 0.592053018171 | 0.307483475951 | 0.029756146051 |
| H801 | H | 0.369231270206 | 0.796182364845 | 0.034929669674 |
| H802 | H | 0.600734069817 | 0.269043503924 | 0.064957736025 |
| H803 | H | 0.278197009882 | 0.660983387468 | 0.878005430720 |
| H804 | H | 0.725394441796 | 0.125644545579 | 0.159668489203 |
| H805 | H | 0.268895569019 | 0.590634893612 | 0.857102689185 |
| H806 | H | 0.715936517104 | 0.045014125667 | 0.172044574232 |
| H807 | H | 0.340502942025 | 0.617895173336 | 0.825057721213 |
| H808 | H | 0.656852757845 | 0.071555030231 | 0.206902453032 |
| H809 | H | 0.347842216777 | 0.534030830513 | 0.835726890173 |
| H810 | H | 0.630803365403 | 0.991246728560 | 0.199533280873 |
| H811 | H | 0.980947718670 | 0.406940065346 | 0.879384149336 |
| H812 | H | 0.035955484255 | 0.897639953595 | 0.170580970605 |
| H813 | H | 0.993861211075 | 0.361874328719 | 0.847598437469 |
| H814 | H | 0.021919487829 | 0.842320130884 | 0.198921453555 |
| H815 | H | 0.073084863130 | 0.419642115650 | 0.874131286289 |
| H816 | H | 0.940563491483 | 0.909180253261 | 0.177363833572 |
| H817 | H | 0.095382477192 | 0.392623400373 | 0.908380502837 |
| H818 | H | 0.920503297823 | 0.878576076575 | 0.143441820574 |
| H819 | H | 0.080501831973 | 0.585282895278 | 0.876639819660 |
| H820 | H | 0.828042696494 | 0.064955979712 | 0.161599055904 |
| H821 | H | 0.104049840251 | 0.522886355288 | 0.899024378696 |
| H822 | H | 0.880219555459 | 0.009720693572 | 0.158117942073 |
| H823 | H | 0.632328656799 | 0.308426526732 | 0.873573693379 |
| H824 | H | 0.608150004158 | 0.388432883854 | 0.876821770392 |
| H825 | H | 0.455239938476 | 0.658174216123 | 0.086253177704 |
| H826 | H | 0.460626893949 | 0.699543346406 | 0.051244811775 |
| H827 | H | 0.383949497280 | 0.738669153979 | 0.953360533281 |
| H828 | H | 0.353920114321 | 0.716596559099 | 0.918170507331 |

|      |   |                |                |                |
|------|---|----------------|----------------|----------------|
| H829 | H | 0.391306235860 | 0.226078977064 | 0.994854172743 |
| H830 | H | 0.338329797772 | 0.172725684617 | 0.986534059443 |
| H831 | H | 0.437625681734 | 0.604735555752 | 0.951528481974 |
| H832 | H | 0.391391328439 | 0.566696149532 | 0.927222246356 |
| H833 | H | 0.578775838853 | 0.927353423695 | 0.040742644800 |
| H834 | H | 0.548883192809 | 0.951887658755 | 0.005481595426 |
| H835 | H | 0.295672804156 | 0.562913372300 | 0.904998252457 |
| H836 | H | 0.308201576260 | 0.510696805552 | 0.937765849419 |
| H837 | H | 0.526399409222 | 0.254864981560 | 0.090116315555 |
| H838 | H | 0.541377508683 | 0.235029565629 | 0.127738167191 |
| H839 | H | 0.451434699747 | 0.644658715158 | 0.901594297107 |
| H840 | H | 0.477798546219 | 0.674563294086 | 0.866701229044 |
| H841 | H | 0.512343720753 | 0.335549928642 | 0.997823007114 |
| H842 | H | 0.567977152986 | 0.383029597654 | 0.986725466575 |
| H843 | H | 0.449006729148 | 0.999925583370 | 0.092261089935 |
| H844 | H | 0.495650661220 | 0.064983691671 | 0.094388022049 |
| H845 | H | 0.422252664421 | 0.921847891801 | 0.030378469486 |
| H846 | H | 0.477581960263 | 0.872128176040 | 0.034864742433 |
| H847 | H | 0.425951465704 | 0.030662839801 | 0.175373280191 |
| H848 | H | 0.407419003736 | 0.041599270420 | 0.138437417034 |
| H849 | H | 0.573544429989 | 0.684030722447 | 0.951684836608 |
| H850 | H | 0.518905677129 | 0.700603530247 | 0.927282846838 |
| H851 | H | 0.652708156553 | 0.958498070438 | 0.085806041157 |
| H852 | H | 0.650198192419 | 0.873670970618 | 0.074529017756 |
| H853 | H | 0.617464544925 | 0.090303223581 | 0.899198074487 |
| H854 | H | 0.595150157713 | 0.015687703021 | 0.884763514767 |
| H855 | H | 0.557126487968 | 0.285723565886 | 0.921713611526 |
| H856 | H | 0.565282432909 | 0.209668312445 | 0.939343502925 |
| H857 | H | 0.406634004677 | 0.746863183229 | 0.094340436171 |
| H858 | H | 0.346340433408 | 0.753546425328 | 0.112123097262 |
| H859 | H | 0.426878483986 | 0.064639063665 | 0.933493888185 |
| H860 | H | 0.465012331808 | 0.111168739417 | 0.961050612712 |
| H861 | H | 0.523977478643 | 0.670188566456 | 0.013360584686 |
| H862 | H | 0.483640079234 | 0.737281863152 | 0.000333761308 |
| H863 | H | 0.616427855132 | 0.079761138223 | 0.094380697248 |
| H864 | H | 0.576377708143 | 0.151511704302 | 0.096191290057 |
| H865 | H | 0.333955806784 | 0.383434712080 | 0.948194927367 |
| H866 | H | 0.396487531561 | 0.392975309265 | 0.930622830282 |
| H867 | H | 0.422849813473 | 0.933727444040 | 0.134365928867 |
| H868 | H | 0.414964691523 | 0.863840760239 | 0.111015515484 |
| H869 | H | 0.548019557144 | 0.508830962774 | 0.075590363644 |
| H870 | H | 0.528970298813 | 0.584440437978 | 0.092468431755 |
| H871 | H | 0.472407420778 | 0.165651689027 | 0.901470437496 |
| H872 | H | 0.433474952167 | 0.185316453994 | 0.869399250835 |
| H873 | H | 0.405015043858 | 0.113407249526 | 0.073073525187 |
| H874 | H | 0.371749800985 | 0.161219625872 | 0.043060687194 |
| H875 | H | 0.643278560523 | 0.771320280108 | 0.106933543379 |
| H876 | H | 0.605927285828 | 0.799772161207 | 0.136598220053 |
| H877 | H | 0.706817674415 | 0.024020427481 | 0.964661186772 |
| H878 | H | 0.706019624609 | 0.006010905072 | 0.003287839871 |
| H879 | H | 0.587767871582 | 0.570828205186 | 0.926211862153 |
| H880 | H | 0.540640216732 | 0.595784997000 | 0.898874963034 |
| H881 | H | 0.530973054891 | 0.646066450000 | 0.131958759212 |
| H882 | H | 0.474958315061 | 0.597609797462 | 0.137984636716 |
| H883 | H | 0.320027386107 | 0.654339082431 | 0.972731526926 |
| H884 | H | 0.322706790539 | 0.690528807189 | 0.007986037629 |
| H885 | H | 0.646206444586 | 0.780452592044 | 0.041514589059 |
| H886 | H | 0.672278808063 | 0.723655444783 | 0.067626600215 |
| H887 | H | 0.390374200375 | 0.170111230294 | 0.934420355070 |
| H888 | H | 0.363875441777 | 0.250477032106 | 0.932323743737 |
| H889 | H | 0.674645889192 | 0.148796051872 | 0.998246832979 |
| H890 | H | 0.685453988013 | 0.227387169058 | 0.985277368893 |
| H891 | H | 0.574684234378 | 0.761205376743 | 0.007167999240 |



|      |   |                |                |                |
|------|---|----------------|----------------|----------------|
| H892 | H | 0.596264296621 | 0.841172528014 | 0.005599366144 |
| H893 | H | 0.578599273718 | 0.899144429843 | 0.109265903670 |
| H894 | H | 0.512499082457 | 0.884931717410 | 0.122899678111 |
| H895 | H | 0.533938762646 | 0.121517188415 | 0.006835962094 |
| H896 | H | 0.481788389704 | 0.173667891605 | 0.015354111981 |
| H897 | H | 0.640234577242 | 0.146999264158 | 0.952188503149 |
| H898 | H | 0.584963043730 | 0.091760026703 | 0.949370223355 |
| H899 | H | 0.526824421545 | 0.410510978538 | 0.043804479237 |
| H900 | H | 0.477191551412 | 0.444464914686 | 0.066807957502 |
| H901 | H | 0.450749351647 | 0.813674702898 | 0.957383589109 |
| H902 | H | 0.431114157161 | 0.827531178497 | 0.995924608455 |
| H903 | H | 0.529870492593 | 0.181566334702 | 0.853382892772 |
| H904 | H | 0.585066888219 | 0.130714706915 | 0.847853161721 |
| H905 | H | 0.265782222135 | 0.542136376349 | 0.062676124517 |
| H906 | H | 0.288135384245 | 0.576910009923 | 0.028194732290 |
| H907 | H | 0.431593392189 | 0.762424557119 | 0.152873709986 |
| H908 | H | 0.406535551431 | 0.784171665830 | 0.187587487904 |
| H909 | H | 0.442159769011 | 0.049442723429 | 0.015830626683 |
| H910 | H | 0.372001082687 | 0.031750774339 | 0.015913049369 |
| H911 | H | 0.582177888320 | 0.888203251442 | 0.903426034024 |
| H912 | H | 0.538841930270 | 0.930232225373 | 0.879246546766 |
| H913 | H | 0.335187930457 | 0.341302311478 | 0.889160006034 |
| H914 | H | 0.341804040707 | 0.289184962691 | 0.858420278118 |
| H915 | H | 0.490576384836 | 0.873254906720 | 0.911726492442 |
| H916 | H | 0.467025208931 | 0.793139170398 | 0.903891909591 |
| H917 | H | 0.556116866362 | 0.437980339661 | 0.941527879239 |
| H918 | H | 0.607816994351 | 0.385511183933 | 0.932572075512 |
| H919 | H | 0.448953811042 | 0.209132156917 | 0.061742247866 |
| H920 | H | 0.458342448780 | 0.287580592000 | 0.049696692054 |
| H921 | H | 0.609038559149 | 0.186093241227 | 0.028985194195 |
| H922 | H | 0.598414666748 | 0.111250417945 | 0.045925802182 |
| H923 | H | 0.740225926286 | 0.924159525591 | 0.032543061086 |
| H924 | H | 0.797438989219 | 0.958685200709 | 0.047562924493 |
| H925 | H | 0.376320922184 | 0.423867906377 | 0.858601618252 |
| H926 | H | 0.368102839055 | 0.489506670207 | 0.883194866262 |
| H927 | H | 0.335922799892 | 0.652737817251 | 0.079971018530 |
| H928 | H | 0.272859225485 | 0.644606179153 | 0.096685953374 |
| H929 | H | 0.389854283993 | 0.427193655845 | 0.062131674902 |
| H930 | H | 0.362510196893 | 0.505923209048 | 0.057989477444 |
| H931 | H | 0.718570457110 | 0.026348617435 | 0.078176289852 |
| H932 | H | 0.711218978397 | 0.049172070617 | 0.117352982200 |
| H933 | H | 0.372323854847 | 0.425199235616 | 0.140241806995 |
| H934 | H | 0.371903837422 | 0.477317025656 | 0.108642252215 |
| H935 | H | 0.526018518551 | 0.343199961630 | 0.875591215818 |
| H936 | H | 0.471033728102 | 0.294678714297 | 0.882064102292 |
| H937 | H | 0.283233356367 | 0.470691687763 | 0.997603801610 |
| H938 | H | 0.348935003361 | 0.457607547875 | 0.985479704538 |
| H939 | H | 0.483176026076 | 0.267274639389 | 0.961646276317 |
| H940 | H | 0.423339678491 | 0.313761371727 | 0.963226934482 |
| H941 | H | 0.466071018725 | 0.485158806781 | 0.924441399960 |
| H942 | H | 0.476099239645 | 0.402050231572 | 0.909630959598 |
| H943 | H | 0.623288729515 | 0.680283571294 | 0.139343218535 |
| H944 | H | 0.622588478562 | 0.589104598728 | 0.142055306979 |
| H945 | H | 0.554575651297 | 0.573405324266 | 0.035426708244 |
| H946 | H | 0.509817460869 | 0.562599579783 | 0.004779857324 |
| H947 | H | 0.446735090260 | 0.440548066324 | 0.974101396392 |
| H948 | H | 0.427018427053 | 0.496737388662 | 0.002876045329 |
| H949 | H | 0.607608708191 | 0.001040879794 | 0.973181019882 |
| H950 | H | 0.557060312703 | 0.979284186320 | 0.946393756854 |
| H951 | H | 0.428307603079 | 0.607828150733 | 0.031871865275 |
| H952 | H | 0.381729798745 | 0.604187419743 | 0.002655443646 |
| H953 | H | 0.681900859427 | 0.602388738626 | 0.058396047241 |
| H954 | H | 0.629119620500 | 0.613966489830 | 0.081751616739 |

|      |   |                |                |                |
|------|---|----------------|----------------|----------------|
| H955 | H | 0.607248054702 | 0.592587145361 | 0.981695380712 |
| H956 | H | 0.666485599182 | 0.608048787111 | 0.959316604946 |
| H957 | H | 0.577088483917 | 0.479973693529 | 0.842369403006 |
| H958 | H | 0.598058389104 | 0.504468687533 | 0.877387909141 |
| H959 | H | 0.351796147394 | 0.324509876128 | 0.041803379240 |
| H960 | H | 0.401698674069 | 0.370444401456 | 0.021661689845 |
| H961 | H | 0.464592450602 | 0.499717360633 | 0.844107697276 |
| H962 | H | 0.494196405862 | 0.569946394299 | 0.828058202856 |
| H963 | H | 0.416596171075 | 0.679716753262 | 0.244867409153 |
| H964 | H | 0.409904643214 | 0.675366844523 | 0.191223269894 |
| H965 | H | 0.423009792523 | 0.598099672437 | 0.205432610247 |
| H966 | H | 0.451537766145 | 0.878704224101 | 0.238044252302 |
| H967 | H | 0.477752250929 | 0.650307013794 | 0.255705794660 |
| H968 | H | 0.443013901642 | 0.987092779880 | 0.249686517351 |
| H969 | H | 0.471602878691 | 0.920858457316 | 0.206521073033 |
| H970 | H | 0.347237462957 | 0.284605266119 | 0.225990692518 |
| H971 | H | 0.466850977367 | 0.065140594886 | 0.260786275876 |
| H972 | H | 0.388517432140 | 0.416460078039 | 0.219243603213 |
| H973 | H | 0.417972081876 | 0.294128077790 | 0.220463960900 |
| H974 | H | 0.424636751830 | 0.477980402516 | 0.200700870053 |
| C1   | C | 0.719550514019 | 0.834193587097 | 0.945238302822 |
| C2   | C | 0.288866045517 | 0.312270938925 | 0.110235996614 |
| C3   | C | 0.743972165007 | 0.835338082578 | 0.909731866793 |
| C4   | C | 0.254223871921 | 0.321812341877 | 0.142958803689 |
| C5   | C | 0.769580210343 | 0.841064866918 | 0.972624759153 |
| C6   | C | 0.244883868984 | 0.308758735263 | 0.079898254195 |
| C7   | C | 0.809427427518 | 0.908770450562 | 0.969158952593 |
| C8   | C | 0.209074086108 | 0.380032418478 | 0.075602311347 |
| C9   | C | 0.767887612963 | 0.912972556268 | 0.861558690953 |
| C10  | C | 0.217041167960 | 0.404486023102 | 0.185570757933 |
| C11  | C | 0.828789600157 | 0.949705489086 | 0.868838206266 |
| C12  | C | 0.156402140760 | 0.431132526083 | 0.171796126892 |
| C13  | C | 0.727854486809 | 0.959096779085 | 0.837129584291 |
| C14  | C | 0.239415666120 | 0.467091261799 | 0.210010496448 |
| C15  | C | 0.667522497899 | 0.920294395296 | 0.831051610311 |
| C16  | C | 0.258352774691 | 0.436716987778 | 0.244173971185 |
| C17  | C | 0.937342953428 | 0.945792982683 | 0.857643871427 |
| C18  | C | 0.047696819536 | 0.426022971232 | 0.184641462049 |
| C19  | C | 0.965537082687 | 0.961116497359 | 0.823451471118 |
| C20  | C | 0.024114556248 | 0.444418497004 | 0.219831068287 |
| C21  | C | 0.973505098100 | 0.884137206466 | 0.875287760234 |
| C22  | C | 0.009945665343 | 0.362952619952 | 0.169243209453 |
| C23  | C | 0.014592726447 | 0.045198931476 | 0.785642774569 |
| C24  | C | 0.984226338318 | 0.533341874161 | 0.258919925502 |
| C25  | C | 0.083418756788 | 0.050010482050 | 0.785757767026 |
| C26  | C | 0.915403049982 | 0.539596003860 | 0.260958465877 |
| C27  | C | 0.984317914120 | 0.115943359305 | 0.772575308301 |
| C28  | C | 0.016054314848 | 0.604208521045 | 0.270617330168 |
| C29  | C | 0.177845287074 | 0.025248500303 | 0.756917043994 |
| C30  | C | 0.823698675622 | 0.516736804517 | 0.292851710384 |
| C31  | C | 0.203736550737 | 0.102366345342 | 0.751258161131 |
| C32  | C | 0.798417925899 | 0.593792096248 | 0.298929783574 |
| C33  | C | 0.190939658752 | 0.972660706439 | 0.727641137085 |
| C34  | C | 0.813299528555 | 0.464851971913 | 0.322762168613 |
| C35  | C | 0.136443194120 | 0.982727770538 | 0.704052335009 |
| C36  | C | 0.869907047994 | 0.474630271304 | 0.344711958433 |
| C37  | C | 0.083688632998 | 0.988218263033 | 0.728249021465 |
| C38  | C | 0.920288190578 | 0.480773563517 | 0.319008836186 |
| C39  | C | 0.182814378894 | 0.230159037436 | 0.734601534124 |
| C40  | C | 0.820568780740 | 0.721978575028 | 0.313179267312 |
| C41  | C | 0.128333655448 | 0.279856995431 | 0.740388555733 |
| C42  | C | 0.875555713159 | 0.769628957210 | 0.305914628027 |
| C43  | C | 0.209031870818 | 0.243861511272 | 0.699882814493 |

|      |   |                |                |                |
|------|---|----------------|----------------|----------------|
| C44  | C | 0.793900718849 | 0.740989036714 | 0.347223776503 |
| C45  | C | 0.095828158711 | 0.406925529917 | 0.750178319928 |
| C46  | C | 0.907327487506 | 0.896873823276 | 0.294320412664 |
| C47  | C | 0.057270434648 | 0.418440029746 | 0.718236558709 |
| C48  | C | 0.948320415894 | 0.905771474076 | 0.325523551051 |
| C49  | C | 0.124239806162 | 0.478558291129 | 0.764498337637 |
| C50  | C | 0.875969817479 | 0.969264574435 | 0.283512955408 |
| C51  | C | 0.139238501247 | 0.466186177438 | 0.802090690304 |
| C52  | C | 0.846432438232 | 0.959955259041 | 0.248458004651 |
| C53  | C | 0.083121692189 | 0.544976796820 | 0.758828837006 |
| C54  | C | 0.919434901437 | 0.034343355211 | 0.285260348170 |
| C55  | C | 0.169349191727 | 0.530434012709 | 0.820572763389 |
| C56  | C | 0.811042128447 | 0.027187506372 | 0.236141730649 |
| C57  | C | 0.046505589383 | 0.425943952405 | 0.657891596022 |
| C58  | C | 0.960241348692 | 0.918910913997 | 0.386017574801 |
| C59  | C | 0.009157433009 | 0.355453830932 | 0.652763919960 |
| C60  | C | 0.996311931167 | 0.848319240003 | 0.393348346071 |
| C61  | C | 0.082777538212 | 0.449593830201 | 0.626615818998 |
| C62  | C | 0.923499574891 | 0.948821480879 | 0.416017721007 |
| C63  | C | 0.052696998759 | 0.425353434651 | 0.593404760955 |
| C64  | C | 0.951283239059 | 0.929595419951 | 0.450472244394 |
| C65  | C | 0.092026123633 | 0.533606756427 | 0.627864044881 |
| C66  | C | 0.916218345252 | 0.032630657467 | 0.411643087227 |
| C67  | C | 0.995893239212 | 0.223569136080 | 0.660318672732 |
| C68  | C | 0.009829966275 | 0.716336358807 | 0.386144179564 |
| C69  | C | 0.939958635648 | 0.233186116741 | 0.682728612534 |
| C70  | C | 0.066215541920 | 0.725409501954 | 0.363844915125 |
| C71  | C | 0.032556476112 | 0.154328041374 | 0.668802717230 |
| C72  | C | 0.973217095225 | 0.647098651300 | 0.377530773838 |
| C73  | C | 0.897585538507 | 0.287882434615 | 0.734226881799 |
| C74  | C | 0.110071831532 | 0.775482596205 | 0.312067988519 |
| C75  | C | 0.853974729780 | 0.342078852234 | 0.716908486821 |
| C76  | C | 0.151252649613 | 0.832505350200 | 0.329365567377 |
| C77  | C | 0.921794186768 | 0.321337764986 | 0.767360165772 |
| C78  | C | 0.089057298410 | 0.804536854776 | 0.277386077967 |
| C79  | C | 0.873412434679 | 0.355001923904 | 0.789982068649 |
| C80  | C | 0.139526970450 | 0.836856611293 | 0.255522550911 |
| C81  | C | 0.826467674254 | 0.302092733456 | 0.804147382448 |
| C82  | C | 0.187358402575 | 0.783603328215 | 0.242366744488 |
| C83  | C | 0.830674724008 | 0.183100358367 | 0.835221578646 |
| C84  | C | 0.188156988334 | 0.674525706404 | 0.204116858840 |
| C85  | C | 0.838698373012 | 0.452025719268 | 0.683338516280 |
| C86  | C | 0.162066619895 | 0.945170476146 | 0.361625867493 |
| C87  | C | 0.800892423934 | 0.410658543648 | 0.656370898283 |
| C88  | C | 0.202959955742 | 0.908622343166 | 0.388593228087 |
| C89  | C | 0.874151761777 | 0.515190666475 | 0.667246205541 |
| C90  | C | 0.123976674390 | 0.006287651638 | 0.377549597832 |
| C91  | C | 0.799661004496 | 0.319143923960 | 0.611668636602 |
| C92  | C | 0.213298083182 | 0.824491509355 | 0.435438364043 |
| C93  | C | 0.752433266165 | 0.267905275395 | 0.627046570533 |
| C94  | C | 0.253837252879 | 0.764522521543 | 0.420614472414 |
| C95  | C | 0.845035913490 | 0.275102828644 | 0.591234948185 |
| C96  | C | 0.176069142951 | 0.797379143040 | 0.465189270226 |
| C97  | C | 0.882945547770 | 0.325014332383 | 0.568433987552 |
| C98  | C | 0.160214563554 | 0.862948677841 | 0.487924838762 |
| C99  | C | 0.726874241680 | 0.185405316506 | 0.673532483120 |
| C100 | C | 0.278507608698 | 0.682991085882 | 0.374044841314 |
| C101 | C | 0.668619258698 | 0.226085436364 | 0.682395795417 |
| C102 | C | 0.336628302681 | 0.723472025687 | 0.364460972694 |
| C103 | C | 0.758635262849 | 0.153477392961 | 0.705143752402 |
| C104 | C | 0.246794983494 | 0.647587901978 | 0.343187874850 |
| C105 | C | 0.721608083824 | 0.094419480306 | 0.721941470821 |
| C106 | C | 0.285085950917 | 0.588362769055 | 0.327336827106 |

|      |   |                |                |                |
|------|---|----------------|----------------|----------------|
| C107 | C | 0.679114688017 | 0.111682112000 | 0.746611716947 |
| C108 | C | 0.327303620843 | 0.605575144176 | 0.302525115008 |
| C109 | C | 0.728162285114 | 0.020556167520 | 0.711963868370 |
| C110 | C | 0.280416750079 | 0.514912425042 | 0.338285855923 |
| C111 | C | 0.643726784221 | 0.056247206126 | 0.760797475053 |
| C112 | C | 0.364340462230 | 0.550703818180 | 0.289298691237 |
| C113 | C | 0.692932773633 | 0.964955713005 | 0.726099199161 |
| C114 | C | 0.317812866029 | 0.460082791926 | 0.325254272895 |
| C115 | C | 0.650354444472 | 0.983041946867 | 0.750371101745 |
| C116 | C | 0.360310146699 | 0.478281871600 | 0.300973525606 |
| C117 | C | 0.622258726980 | 0.332145491944 | 0.708258421855 |
| C118 | C | 0.381342174166 | 0.831830788653 | 0.338610222791 |
| C119 | C | 0.582967108589 | 0.355022529338 | 0.677793305710 |
| C120 | C | 0.418908103588 | 0.855662088441 | 0.369584701584 |
| C121 | C | 0.637805214340 | 0.399161398127 | 0.730183821566 |
| C122 | C | 0.362363317854 | 0.898022488092 | 0.317120312386 |
| C123 | C | 0.665497773716 | 0.379919739676 | 0.764405702299 |
| C124 | C | 0.342229297604 | 0.876939746636 | 0.281502119065 |
| C125 | C | 0.576915816246 | 0.391061490231 | 0.618650513467 |
| C126 | C | 0.422590414670 | 0.892294257637 | 0.428581188864 |
| C127 | C | 0.544218584632 | 0.321647870787 | 0.605464082691 |
| C128 | C | 0.457066533818 | 0.824164179947 | 0.441678463114 |
| C129 | C | 0.618051871676 | 0.427048110943 | 0.592111079013 |
| C130 | C | 0.380508956730 | 0.925258808545 | 0.455423000677 |
| C131 | C | 0.589046328402 | 0.424879959001 | 0.556966011442 |
| C132 | C | 0.410061390412 | 0.923500377949 | 0.490490136853 |
| C133 | C | 0.633339355225 | 0.506087064152 | 0.602803346428 |
| C134 | C | 0.362029191829 | 0.003791945846 | 0.445523896643 |
| C135 | C | 0.551119036965 | 0.189128842840 | 0.593212202876 |
| C136 | C | 0.453915801207 | 0.691652997632 | 0.453943509679 |
| C137 | C | 0.494912669410 | 0.167957458930 | 0.613628874299 |
| C138 | C | 0.508809303640 | 0.671262468655 | 0.432312850514 |
| C139 | C | 0.601971289045 | 0.131332909020 | 0.595378225496 |
| C140 | C | 0.404072501639 | 0.632403925901 | 0.453795019764 |
| C141 | C | 0.446856611249 | 0.170028889076 | 0.668679437578 |
| C142 | C | 0.554184952364 | 0.676353737926 | 0.376662936340 |
| C143 | C | 0.393574728078 | 0.223027251162 | 0.664157261846 |
| C144 | C | 0.606173861116 | 0.731632598712 | 0.379948345713 |
| C145 | C | 0.469045015960 | 0.170193136629 | 0.705538540773 |
| C146 | C | 0.529604455315 | 0.671814515498 | 0.340361952428 |
| C147 | C | 0.512955736370 | 0.107309554353 | 0.713948510905 |
| C148 | C | 0.491655985702 | 0.602395669664 | 0.333984638077 |
| C149 | C | 0.482603030000 | 0.032047045077 | 0.717710810513 |
| C150 | C | 0.528513112612 | 0.531567781510 | 0.331342915065 |
| C151 | C | 0.396847470806 | 0.992170255461 | 0.754634199390 |
| C152 | C | 0.613784669403 | 0.490794585511 | 0.295104110956 |
| C153 | C | 0.351128043214 | 0.339959354520 | 0.644738632478 |
| C154 | C | 0.647490069045 | 0.848275142449 | 0.400311192641 |
| C155 | C | 0.294304243279 | 0.308846849927 | 0.627211526903 |
| C156 | C | 0.704100207685 | 0.815409492823 | 0.417156744784 |
| C157 | C | 0.371271189969 | 0.411516760424 | 0.627573821602 |
| C158 | C | 0.626390200499 | 0.917194293386 | 0.419301620306 |
| C159 | C | 0.413096247562 | 0.462113911958 | 0.648596727428 |
| C160 | C | 0.591515086190 | 0.973845576117 | 0.397785734961 |
| C161 | C | 0.429813236697 | 0.528169687335 | 0.626431959611 |
| C162 | C | 0.565922007837 | 0.032404784706 | 0.421497359837 |
| C163 | C | 0.384443289568 | 0.486474432150 | 0.681729078369 |
| C164 | C | 0.631566619100 | 0.008394426643 | 0.370912150991 |
| C165 | C | 0.242943320984 | 0.229078705550 | 0.586547052103 |
| C166 | C | 0.752638996066 | 0.734133735801 | 0.458347337554 |
| C167 | C | 0.222276473789 | 0.160803334660 | 0.606032565909 |
| C168 | C | 0.768125595759 | 0.660721293975 | 0.441382892799 |
| C169 | C | 0.259790569085 | 0.207380646786 | 0.550502582591 |

|      |   |                |                |                |
|------|---|----------------|----------------|----------------|
| C170 | C | 0.736398578218 | 0.722030389947 | 0.495135596125 |
| C171 | C | 0.328598774495 | 0.199494831099 | 0.551615988971 |
| C172 | C | 0.667877709661 | 0.712445436687 | 0.494313461961 |
| C173 | C | 0.349489998184 | 0.258490696901 | 0.576575989897 |
| C174 | C | 0.647275446920 | 0.768268123130 | 0.467829055382 |
| C175 | C | 0.241033790026 | 0.073913534345 | 0.652284364819 |
| C176 | C | 0.755300898960 | 0.578271752522 | 0.393089926546 |
| C177 | C | 0.273787636999 | 0.002263169271 | 0.644248751205 |
| C178 | C | 0.729388857071 | 0.506106741183 | 0.406185063673 |
| C179 | C | 0.351632722946 | 0.940697111419 | 0.610967967822 |
| C180 | C | 0.651419568695 | 0.446585200216 | 0.439591483857 |
| C181 | C | 0.374590708474 | 0.901358150302 | 0.642893828227 |
| C182 | C | 0.632333128053 | 0.401596523354 | 0.408506614607 |
| C183 | C | 0.407848938839 | 0.967345861822 | 0.591706834514 |
| C184 | C | 0.592437634945 | 0.470455687728 | 0.456912450574 |
| C185 | C | 0.442677382097 | 0.903140285844 | 0.576728698284 |
| C186 | C | 0.560140334317 | 0.404794240265 | 0.472432844964 |
| C187 | C | 0.393949487320 | 0.788972076758 | 0.674922440475 |
| C188 | C | 0.616375929535 | 0.285195940500 | 0.379659109895 |
| C189 | C | 0.459502409160 | 0.809112009629 | 0.682505882439 |
| C190 | C | 0.550893136604 | 0.303944520586 | 0.371264897938 |
| C191 | C | 0.388275260892 | 0.707187311583 | 0.665150774868 |
| C192 | C | 0.622845221083 | 0.205197320897 | 0.391593083369 |
| C193 | C | 0.330246639459 | 0.706217746313 | 0.643943699031 |
| C194 | C | 0.679534429363 | 0.207931429975 | 0.413949093742 |
| C195 | C | 0.332036979825 | 0.778367346022 | 0.623816945686 |
| C196 | C | 0.675923723054 | 0.282783937809 | 0.431853095768 |
| C197 | C | 0.536585254449 | 0.819104648374 | 0.726456757351 |
| C198 | C | 0.476779678419 | 0.317760139095 | 0.326347359979 |
| C199 | C | 0.578426901301 | 0.765039025013 | 0.708402301715 |
| C200 | C | 0.431410658120 | 0.265347470666 | 0.342621942173 |
| C201 | C | 0.544609859316 | 0.809982861241 | 0.764740778545 |
| C202 | C | 0.472086101365 | 0.311231340583 | 0.287989141453 |
| C203 | C | 0.513608923882 | 0.869002671505 | 0.785954769031 |
| C204 | C | 0.509943296472 | 0.367045851804 | 0.268608875308 |
| C205 | C | 0.525992444607 | 0.862819175120 | 0.823779203268 |
| C206 | C | 0.509543366523 | 0.355211477950 | 0.230710017999 |
| C207 | C | 0.597804137780 | 0.640457246659 | 0.688613347115 |
| C208 | C | 0.404255003135 | 0.142005066579 | 0.360674445723 |
| C209 | C | 0.615244106351 | 0.661953967299 | 0.652575326393 |
| C210 | C | 0.386260077611 | 0.163344014757 | 0.396586193800 |
| C211 | C | 0.568244893351 | 0.564115953789 | 0.689816094467 |
| C212 | C | 0.428948231142 | 0.063199684675 | 0.358857709393 |
| C213 | C | 0.584684623526 | 0.714735897679 | 0.598374389235 |
| C214 | C | 0.415425630630 | 0.215689235584 | 0.451193609850 |
| C215 | C | 0.623784849447 | 0.784502582194 | 0.599137792709 |
| C216 | C | 0.378040062195 | 0.286877240781 | 0.450111593819 |
| C217 | C | 0.525998505873 | 0.726400254102 | 0.577940508190 |
| C218 | C | 0.473566163657 | 0.225815014125 | 0.472277727963 |
| C219 | C | 0.497059895327 | 0.654439890233 | 0.564751012400 |
| C220 | C | 0.502755506372 | 0.153034938877 | 0.484210676975 |
| C221 | C | 0.431776475596 | 0.668210478803 | 0.552750050458 |
| C222 | C | 0.568316566329 | 0.166462110951 | 0.495823252522 |
| C223 | C | 0.534947504555 | 0.618812582731 | 0.537154505603 |
| C224 | C | 0.465535030135 | 0.115253927551 | 0.511529685911 |
| C225 | C | 0.651880903819 | 0.897793944730 | 0.626992260955 |
| C226 | C | 0.354956121940 | 0.402432131703 | 0.422511281050 |
| C227 | C | 0.716434316149 | 0.877025421145 | 0.638469046923 |
| C228 | C | 0.290970816244 | 0.384392684783 | 0.409489409831 |
| C229 | C | 0.623667146668 | 0.957210214660 | 0.649029422531 |
| C230 | C | 0.384652796202 | 0.460509426463 | 0.400364907123 |
| C231 | C | 0.783130521508 | 0.788246907082 | 0.667629188744 |
| C232 | C | 0.225591436537 | 0.300178554931 | 0.376923291877 |

|      |   |                |                |                |
|------|---|----------------|----------------|----------------|
| C233 | C | 0.817493422175 | 0.759342812251 | 0.636924794253 |
| C234 | C | 0.188342032251 | 0.271619274231 | 0.406580742519 |
| C235 | C | 0.776311690257 | 0.728195954163 | 0.694460917252 |
| C236 | C | 0.233883884670 | 0.242828277326 | 0.349151039698 |
| C237 | C | 0.821126148860 | 0.687517836874 | 0.586198512957 |
| C238 | C | 0.177658190708 | 0.194048922344 | 0.454883485171 |
| C239 | C | 0.830849607332 | 0.752532924238 | 0.561960071362 |
| C240 | C | 0.165977900461 | 0.257383325415 | 0.479486969163 |
| C241 | C | 0.792316967862 | 0.620258793393 | 0.568565617773 |
| C242 | C | 0.203721876405 | 0.125546739015 | 0.472753651614 |
| C243 | C | 0.799511093668 | 0.548112244006 | 0.588114499488 |
| C244 | C | 0.195260307370 | 0.055576841485 | 0.451911789996 |
| C245 | C | 0.799480486087 | 0.869927224166 | 0.538066457986 |
| C246 | C | 0.198873286572 | 0.369620621244 | 0.508107213647 |
| C247 | C | 0.852849767287 | 0.920082973342 | 0.547767862808 |
| C248 | C | 0.146286656302 | 0.419886980185 | 0.496834248087 |
| C249 | C | 0.741361405972 | 0.916829847482 | 0.533856841309 |
| C250 | C | 0.257394233930 | 0.415439565079 | 0.512525254699 |
| C251 | C | 0.749683124310 | 0.975369367968 | 0.507177624344 |
| C252 | C | 0.249762598417 | 0.476346707219 | 0.538023242612 |
| C253 | C | 0.759189898511 | 0.954467056572 | 0.473761118709 |
| C254 | C | 0.244763922856 | 0.458634918399 | 0.572127405899 |
| C255 | C | 0.754111351259 | 0.050573730660 | 0.514994505130 |
| C256 | C | 0.243816906666 | 0.550704097419 | 0.528834541394 |
| C257 | C | 0.773332358118 | 0.005675038735 | 0.449040887963 |
| C258 | C | 0.234453396550 | 0.512282263647 | 0.596361806083 |
| C259 | C | 0.768492067849 | 0.102831561127 | 0.490557593269 |
| C260 | C | 0.233339510259 | 0.605366893046 | 0.552794117899 |
| C261 | C | 0.779266999889 | 0.080737335355 | 0.457354659404 |
| C262 | C | 0.228079780794 | 0.586692828984 | 0.586896837693 |
| C263 | C | 0.899064181380 | 0.993165162773 | 0.593623013676 |
| C264 | C | 0.106753258500 | 0.497591266854 | 0.451774995122 |
| C265 | C | 0.958461837452 | 0.964826460560 | 0.608624459815 |
| C266 | C | 0.045187885737 | 0.466552165686 | 0.441364218831 |
| C267 | C | 0.867994520143 | 0.038847803551 | 0.621471757470 |
| C268 | C | 0.133090938205 | 0.539839264142 | 0.421597011070 |
| C269 | C | 0.811021227837 | 0.077899956059 | 0.609054035645 |
| C270 | C | 0.188239098254 | 0.585429357969 | 0.431654882299 |
| C271 | C | 0.010754185165 | 0.859208328926 | 0.634419246960 |
| C272 | C | 0.993384167631 | 0.363848912775 | 0.412608516251 |
| C273 | C | 0.002434744357 | 0.862015286615 | 0.672562179059 |
| C274 | C | 0.000174005100 | 0.362778811341 | 0.374379330735 |
| C275 | C | 0.937264162551 | 0.898539090853 | 0.719234280885 |
| C276 | C | 0.064010073444 | 0.394859379599 | 0.326714774271 |
| C277 | C | 0.915510399871 | 0.819468140020 | 0.727748578066 |
| C278 | C | 0.083259237974 | 0.314055078574 | 0.319913887866 |
| C279 | C | 0.886074171936 | 0.953283253564 | 0.726627795399 |
| C280 | C | 0.116656557839 | 0.446430332441 | 0.317821051774 |
| C281 | C | 0.892090268552 | 0.732943810342 | 0.772687350836 |
| C282 | C | 0.098321086556 | 0.222254337376 | 0.275933371811 |
| C283 | C | 0.843042880188 | 0.737668300907 | 0.799175951734 |
| C284 | C | 0.145157217820 | 0.225039179214 | 0.248257537867 |
| C285 | C | 0.950075723008 | 0.692923157709 | 0.785942797936 |
| C286 | C | 0.039156479837 | 0.181436317783 | 0.264992633368 |
| C287 | C | 0.976577574793 | 0.727479428285 | 0.818335645637 |
| C288 | C | 0.012572717665 | 0.210136652484 | 0.231391895071 |
| C289 | C | 0.995898923719 | 0.688681701459 | 0.757525619422 |
| C290 | C | 0.995015613584 | 0.185403226153 | 0.294257898302 |
| C291 | C | 0.027601791208 | 0.682323921123 | 0.834677253089 |
| C292 | C | 0.962212733055 | 0.162014883478 | 0.216373303509 |
| C293 | C | 0.770835814340 | 0.665050737714 | 0.831782893335 |
| C294 | C | 0.218277058116 | 0.153845193721 | 0.216431238107 |
| C295 | C | 0.799813727479 | 0.608592506051 | 0.855449687020 |

|      |   |                |                |                |
|------|---|----------------|----------------|----------------|
| C296 | C | 0.197205633194 | 0.093880420283 | 0.192253996089 |
| C297 | C | 0.706348651714 | 0.636641460732 | 0.822697414688 |
| C298 | C | 0.283261514345 | 0.136924753573 | 0.229041127408 |
| C299 | C | 0.676549874223 | 0.678027391737 | 0.793124907774 |
| C300 | C | 0.300071135293 | 0.186937543762 | 0.258841765541 |
| C301 | C | 0.666820052478 | 0.639408246921 | 0.854200374037 |
| C302 | C | 0.326878526526 | 0.142544512326 | 0.199394354196 |
| C303 | C | 0.622392578263 | 0.635569082445 | 0.778690795656 |
| C304 | C | 0.362547776427 | 0.172230341555 | 0.274014910891 |
| C305 | C | 0.823928731837 | 0.573831550574 | 0.913098437254 |
| C306 | C | 0.171016102304 | 0.064063539887 | 0.134130607726 |
| C307 | C | 0.773017589721 | 0.561230607667 | 0.937964530687 |
| C308 | C | 0.223656030117 | 0.064359935898 | 0.109505307972 |
| C309 | C | 0.884182967798 | 0.595889127566 | 0.931025257664 |
| C310 | C | 0.108745305796 | 0.080787636310 | 0.116944076250 |
| C311 | C | 0.877839989596 | 0.666971050839 | 0.952042433653 |
| C312 | C | 0.110579223988 | 0.150563155321 | 0.094748663555 |
| C313 | C | 0.934811047644 | 0.599924839594 | 0.905057963500 |
| C314 | C | 0.059210520346 | 0.083239414776 | 0.143694227155 |
| C315 | C | 0.933106056098 | 0.685192857753 | 0.973990502911 |
| C316 | C | 0.052138545788 | 0.166307863723 | 0.074968849134 |
| C317 | C | 0.724847840240 | 0.480482481814 | 0.979051527181 |
| C318 | C | 0.280950131489 | 0.001612414368 | 0.066065708767 |
| C319 | C | 0.735255339100 | 0.528266214404 | 0.010332972644 |
| C320 | C | 0.259044217906 | 0.034229772476 | 0.032519684015 |
| C321 | C | 0.729353258252 | 0.396646917447 | 0.986242614200 |
| C322 | C | 0.298553466041 | 0.919842237143 | 0.063194540078 |
| C323 | C | 0.786787813143 | 0.370215536215 | 0.968600851269 |
| C324 | C | 0.241385605521 | 0.878171020569 | 0.073728036177 |
| C325 | C | 0.797347042265 | 0.425543131984 | 0.940193013536 |
| C326 | C | 0.214116218118 | 0.926809909458 | 0.101146713296 |
| C327 | C | 0.806124144175 | 0.595842758093 | 0.046935856329 |
| C328 | C | 0.175693724481 | 0.083030424095 | 0.999683645380 |
| C329 | C | 0.792185727240 | 0.678668862384 | 0.042949252200 |
| C330 | C | 0.190140179877 | 0.164903307371 | 0.006253887665 |
| C331 | C | 0.808773606675 | 0.801264011382 | 0.070834858751 |
| C332 | C | 0.182723708779 | 0.292091309507 | 0.983088618151 |
| C333 | C | 0.869225373278 | 0.838879185753 | 0.062887892964 |
| C334 | C | 0.121501919009 | 0.332155857847 | 0.984188092958 |
| C335 | C | 0.788244444790 | 0.828090716459 | 0.105565204332 |
| C336 | C | 0.219762493648 | 0.320127448414 | 0.953355733897 |
| C337 | C | 0.979884199049 | 0.822038193826 | 0.066479482047 |
| C338 | C | 0.011119699149 | 0.314862906962 | 0.977019135353 |
| C339 | C | 0.013275531755 | 0.801234495101 | 0.034449529237 |
| C340 | C | 0.972877101762 | 0.295413422008 | 0.007464593444 |
| C341 | C | 0.010620375839 | 0.789826805733 | 0.098415383714 |
| C342 | C | 0.987994216519 | 0.284029356574 | 0.943043746905 |
| C343 | C | 0.070937739157 | 0.826124996946 | 0.106550719857 |
| C344 | C | 0.925344851681 | 0.311334397287 | 0.933538781822 |
| C345 | C | 0.045925003247 | 0.847670807317 | 0.980152003804 |
| C346 | C | 0.942188377766 | 0.340639633233 | 0.062537959920 |
| C347 | C | 0.113567703903 | 0.834327929888 | 0.985909547281 |
| C348 | C | 0.873294921955 | 0.340752832613 | 0.058534567092 |
| C349 | C | 0.039095904081 | 0.917975621791 | 0.959071275746 |
| C350 | C | 0.960919301035 | 0.404270132247 | 0.085710629858 |
| C351 | C | 0.206548695304 | 0.781335311723 | 0.965180739632 |
| C352 | C | 0.776797633481 | 0.287437658410 | 0.074070788899 |
| C353 | C | 0.237359219567 | 0.852825892061 | 0.953238742240 |
| C354 | C | 0.751274206335 | 0.353820673582 | 0.093419188630 |
| C355 | C | 0.216628787572 | 0.715980902498 | 0.941058207209 |
| C356 | C | 0.761308752965 | 0.212418637195 | 0.090369081258 |
| C357 | C | 0.166450867153 | 0.724767953937 | 0.914603582251 |
| C358 | C | 0.813188297968 | 0.200764522425 | 0.115756751873 |

|      |   |                |                |                |
|------|---|----------------|----------------|----------------|
| C359 | C | 0.112526290529 | 0.750255372424 | 0.935173215077 |
| C360 | C | 0.868518710973 | 0.232100518417 | 0.098097033743 |
| C361 | C | 0.330644141399 | 0.927127398585 | 0.955919250014 |
| C362 | C | 0.660922475103 | 0.431593481710 | 0.100041646215 |
| C363 | C | 0.346368182642 | 0.941635494095 | 0.919247834621 |
| C364 | C | 0.655717173193 | 0.432816465065 | 0.138221449102 |
| C365 | C | 0.337787941186 | 0.896885367636 | 0.860673499117 |
| C366 | C | 0.661468411534 | 0.364637820924 | 0.191374232604 |
| C367 | C | 0.276384708010 | 0.906807174311 | 0.842330582108 |
| C368 | C | 0.722610167264 | 0.387595767460 | 0.206855948495 |
| C369 | C | 0.375207014536 | 0.834588029762 | 0.844952293494 |
| C370 | C | 0.637177014572 | 0.291345381527 | 0.205020271024 |
| C371 | C | 0.351556390108 | 0.756347411752 | 0.850294624504 |
| C372 | C | 0.663953970583 | 0.217861106881 | 0.193586789439 |
| C373 | C | 0.167300121957 | 0.928460318499 | 0.848756638097 |
| C374 | C | 0.827892504407 | 0.423123100532 | 0.197356547150 |
| C375 | C | 0.143674767404 | 0.987860190944 | 0.872666702091 |
| C376 | C | 0.848914487714 | 0.483623752369 | 0.173187574966 |
| C377 | C | 0.123429935477 | 0.863788787713 | 0.844092717009 |
| C378 | C | 0.873169561570 | 0.359845675118 | 0.201494755433 |
| C379 | C | 0.141472440256 | 0.813689046983 | 0.815767619124 |
| C380 | C | 0.857239005221 | 0.310293614720 | 0.230372663506 |
| C381 | C | 0.185529610537 | 0.758503767447 | 0.819468119200 |
| C382 | C | 0.813967783295 | 0.254110350554 | 0.227338253907 |
| C383 | C | 0.114842307751 | 0.823770118560 | 0.784005839706 |
| C384 | C | 0.883453672590 | 0.323431684248 | 0.261980910795 |
| C385 | C | 0.201576269732 | 0.714294198857 | 0.792357962340 |
| C386 | C | 0.797880448796 | 0.211940849755 | 0.255072840577 |
| C387 | C | 0.130505401927 | 0.780353430415 | 0.756579033657 |
| C388 | C | 0.868348634612 | 0.281406481358 | 0.289956045028 |
| C389 | C | 0.173517496070 | 0.724391365201 | 0.760855137204 |
| C390 | C | 0.826218194157 | 0.224297551872 | 0.286310917662 |
| C391 | C | 0.176192893907 | 0.098205157859 | 0.903596115745 |
| C392 | C | 0.816471658820 | 0.598574136310 | 0.145880653471 |
| C393 | C | 0.134762604744 | 0.163479299407 | 0.896062290678 |
| C394 | C | 0.867775208069 | 0.653995884485 | 0.151030366532 |
| C395 | C | 0.239378665470 | 0.127064551646 | 0.912518586851 |
| C396 | C | 0.756071065863 | 0.639856048893 | 0.143431174774 |
| C397 | C | 0.082320057036 | 0.236437445470 | 0.853259826992 |
| C398 | C | 0.931647855588 | 0.719726071897 | 0.191555501929 |
| C399 | C | 0.014001666864 | 0.222031934449 | 0.849782406600 |
| C400 | C | 0.999835512813 | 0.702286394005 | 0.193299101904 |
| C401 | C | 0.112083541858 | 0.266132576468 | 0.821293239347 |
| C402 | C | 0.905935913039 | 0.753445101637 | 0.224035221490 |
| C403 | C | 0.180248976256 | 0.274369560987 | 0.827249806398 |
| C404 | C | 0.837478882434 | 0.762284566953 | 0.220143182592 |
| N1   | N | 0.687000800878 | 0.762948841751 | 0.949823318069 |
| N2   | N | 0.324350968390 | 0.242820872542 | 0.113414165207 |
| N3   | N | 0.738307731771 | 0.900027665418 | 0.893436021761 |
| N4   | N | 0.257891393806 | 0.387536641263 | 0.158519124419 |
| N5   | N | 0.875078237985 | 0.923401094681 | 0.851353353944 |
| N6   | N | 0.110220792700 | 0.404619344290 | 0.189529112027 |
| N7   | N | 0.993235281397 | 0.026023602299 | 0.818869737004 |
| N8   | N | 0.001921853876 | 0.512261804958 | 0.225216740218 |
| N9   | N | 0.111416653234 | 0.024329390087 | 0.758287357642 |
| N10  | N | 0.889864917354 | 0.516066253699 | 0.289618005269 |
| N11  | N | 0.165328191039 | 0.154041628654 | 0.739637899035 |
| N12  | N | 0.837275705666 | 0.645191540681 | 0.310060821647 |
| N13  | N | 0.142211764317 | 0.350901850302 | 0.746048337812 |
| N14  | N | 0.861882466190 | 0.840004490235 | 0.299040785740 |
| N15  | N | 0.084429720830 | 0.421124517503 | 0.688198230726 |
| N16  | N | 0.922237424305 | 0.911470775788 | 0.355820087140 |
| N17  | N | 0.033488970689 | 0.289938369417 | 0.661604120564 |



|     |   |                |                |                |
|-----|---|----------------|----------------|----------------|
| N18 | N | 0.972403920756 | 0.782621124959 | 0.384314030398 |
| N19 | N | 0.947983825300 | 0.266323776938 | 0.712901356045 |
| N20 | N | 0.058454915822 | 0.754630557449 | 0.332756312728 |
| N21 | N | 0.855402672976 | 0.247402355384 | 0.826179401643 |
| N22 | N | 0.160513336392 | 0.733158479771 | 0.217450473710 |
| N23 | N | 0.772044049820 | 0.169487130703 | 0.829294396239 |
| N24 | N | 0.247882283613 | 0.665477901603 | 0.206711898196 |
| N25 | N | 0.866413560218 | 0.130907911309 | 0.849047446382 |
| N26 | N | 0.153426311504 | 0.623084118015 | 0.188600672275 |
| N27 | N | 0.878084581805 | 0.400391425783 | 0.701054028787 |
| N28 | N | 0.124868645455 | 0.889640407847 | 0.344896565687 |
| N29 | N | 0.830650142914 | 0.362666979759 | 0.637399187760 |
| N30 | N | 0.176561576990 | 0.861993715336 | 0.410090394455 |
| N31 | N | 0.933556604104 | 0.292796612545 | 0.557124706129 |
| N32 | N | 0.101397209491 | 0.870559793829 | 0.494490101458 |
| N33 | N | 0.768009950096 | 0.234219223283 | 0.656004896065 |
| N34 | N | 0.238049926131 | 0.733849204958 | 0.391089705003 |
| N35 | N | 0.675593930073 | 0.291824182583 | 0.698021957856 |
| N36 | N | 0.329230588413 | 0.788425711795 | 0.348467263850 |
| N37 | N | 0.703386972536 | 0.429095460716 | 0.777664284413 |
| N38 | N | 0.310328035340 | 0.928321627739 | 0.264981497032 |
| N39 | N | 0.611180819676 | 0.375777340121 | 0.649590931210 |
| N40 | N | 0.389230229911 | 0.876089380142 | 0.397429786869 |
| N41 | N | 0.577069286099 | 0.259217136181 | 0.604173695762 |
| N42 | N | 0.425912534484 | 0.760405786365 | 0.442918494491 |
| N43 | N | 0.496682595442 | 0.185811316820 | 0.646417413390 |
| N44 | N | 0.505368739749 | 0.690357572446 | 0.399787138616 |
| N45 | N | 0.447316347069 | 0.030614402291 | 0.748423896608 |
| N46 | N | 0.564965112964 | 0.532645543461 | 0.300953802649 |
| N47 | N | 0.366577087608 | 0.954963189159 | 0.730958461764 |
| N48 | N | 0.640745640606 | 0.450989102880 | 0.319015120305 |
| N49 | N | 0.376608049687 | 0.992981249577 | 0.786379833803 |
| N50 | N | 0.636188890928 | 0.490612176492 | 0.263806888604 |
| N51 | N | 0.400668378683 | 0.287059105413 | 0.647917465156 |
| N52 | N | 0.598556391842 | 0.794633697095 | 0.396714209111 |
| N53 | N | 0.298117209230 | 0.264025291570 | 0.600287847991 |
| N54 | N | 0.698809331321 | 0.770639881028 | 0.444011279522 |
| N55 | N | 0.257329392008 | 0.136599132272 | 0.631645703679 |
| N56 | N | 0.739244824691 | 0.643001236540 | 0.412536118479 |
| N57 | N | 0.315926976652 | 0.004464228250 | 0.620268432312 |
| N58 | N | 0.684354655598 | 0.511355451345 | 0.428597966512 |
| N59 | N | 0.368954294497 | 0.827842044279 | 0.645415680869 |
| N60 | N | 0.639784539936 | 0.328274698817 | 0.408228632458 |
| N61 | N | 0.474139835227 | 0.810516374101 | 0.715436174179 |
| N62 | N | 0.538018169035 | 0.305139315614 | 0.338241810309 |
| N63 | N | 0.558013994303 | 0.695774591347 | 0.703161266033 |
| N64 | N | 0.447534179793 | 0.194474408287 | 0.347081836213 |
| N65 | N | 0.571174439886 | 0.688645294901 | 0.632290530353 |
| N66 | N | 0.429783366830 | 0.189406933093 | 0.417409063505 |
| N67 | N | 0.613081552350 | 0.833800128976 | 0.623775580624 |
| N68 | N | 0.392053045458 | 0.336992687797 | 0.426288785850 |
| N69 | N | 0.723823057593 | 0.817469488110 | 0.657833363715 |
| N70 | N | 0.284353211502 | 0.326318379943 | 0.389232508658 |
| N71 | N | 0.789511013516 | 0.710268011822 | 0.616389254415 |
| N72 | N | 0.212848252499 | 0.218364111841 | 0.426306939069 |
| N73 | N | 0.790973720947 | 0.808730249909 | 0.561498430449 |
| N74 | N | 0.208660115498 | 0.308814446556 | 0.484569442156 |
| N75 | N | 0.859119641106 | 0.935563192763 | 0.580956353265 |
| N76 | N | 0.148857292047 | 0.442966332786 | 0.464570986579 |
| N77 | N | 0.962198963825 | 0.892291133505 | 0.615043747915 |
| N78 | N | 0.044305404808 | 0.397107163389 | 0.429856550143 |
| N79 | N | 0.956015061998 | 0.902174324243 | 0.684427790515 |
| N80 | N | 0.045553457957 | 0.403178882410 | 0.361365374934 |

|      |   |                |                |                |
|------|---|----------------|----------------|----------------|
| N81  | N | 0.905140062099 | 0.806660432406 | 0.760427274925 |
| N82  | N | 0.087025491919 | 0.297039126788 | 0.287144330507 |
| N83  | N | 0.810923077840 | 0.675182363854 | 0.803406978166 |
| N84  | N | 0.174064852295 | 0.160882990978 | 0.242881676719 |
| N85  | N | 0.804116988755 | 0.627006420390 | 0.887908456550 |
| N86  | N | 0.185920997196 | 0.115929162419 | 0.160789309824 |
| N87  | N | 0.768660678423 | 0.494207213712 | 0.952229743657 |
| N88  | N | 0.234196550781 | 0.002031669369 | 0.091896185188 |
| N89  | N | 0.791219720600 | 0.552447054358 | 0.017473570627 |
| N90  | N | 0.199413043545 | 0.038470054330 | 0.026738814068 |
| N91  | N | 0.812054907449 | 0.720830255744 | 0.068770474075 |
| N92  | N | 0.175297614622 | 0.212150954036 | 0.981481419587 |
| N93  | N | 0.918217060047 | 0.794931964684 | 0.063679081551 |
| N94  | N | 0.072052829028 | 0.288299572009 | 0.983821815960 |
| N95  | N | 0.015559136291 | 0.856171087354 | 0.011750199439 |
| N96  | N | 0.970342304232 | 0.349878954069 | 0.030200403117 |
| N97  | N | 0.140999886065 | 0.790320731158 | 0.963795669648 |
| N98  | N | 0.842761238506 | 0.289083967466 | 0.075410683986 |
| N99  | N | 0.295933438856 | 0.860789116852 | 0.963052199682 |
| N100 | N | 0.693096218665 | 0.369478848027 | 0.085895741079 |
| N101 | N | 0.330866652906 | 0.889219419281 | 0.896684504455 |
| N102 | N | 0.660058310869 | 0.367643321748 | 0.154802419319 |
| N103 | N | 0.226868734705 | 0.906570481276 | 0.861403459911 |
| N104 | N | 0.768855313427 | 0.396986692590 | 0.186033457450 |
| N105 | N | 0.180642911382 | 0.046277929308 | 0.876063368688 |
| N106 | N | 0.812482227343 | 0.543009283000 | 0.172010427783 |
| N107 | N | 0.115003137240 | 0.171707489821 | 0.864680988499 |
| N108 | N | 0.894491497113 | 0.657513276077 | 0.181187035233 |
| N109 | N | 0.198812656737 | 0.323691320507 | 0.850314069255 |
| N110 | N | 0.817824964849 | 0.812458780386 | 0.197607291468 |
| O1   | O | 0.768112167378 | 0.779790456872 | 0.897747982614 |
| O2   | O | 0.222875723795 | 0.269957540121 | 0.153199720216 |
| O3   | O | 0.739822106898 | 0.841190785146 | 0.004029396113 |
| O4   | O | 0.280302165936 | 0.294449312092 | 0.050925242328 |
| O5   | O | 0.834013260654 | 0.000879028994 | 0.889916377557 |
| O6   | O | 0.151999735450 | 0.478099186172 | 0.148855379954 |
| O7   | O | 0.721234236691 | 0.032393399165 | 0.849107870723 |
| O8   | O | 0.282498355898 | 0.512867111661 | 0.194103449912 |
| O9   | O | 0.962451739818 | 0.913219932739 | 0.801123753768 |
| O10  | O | 0.026893681791 | 0.396824953918 | 0.242268228354 |
| O11  | O | 0.112271959529 | 0.077069693142 | 0.809743526009 |
| O12  | O | 0.884570748696 | 0.565922950438 | 0.237578180369 |
| O13  | O | 0.258628142783 | 0.113144106618 | 0.756330466267 |
| O14  | O | 0.743275994627 | 0.605230068068 | 0.294686653953 |
| O15  | O | 0.075745909995 | 0.255540968200 | 0.739187874687 |
| O16  | O | 0.927887410780 | 0.744471783471 | 0.307095669367 |
| O17  | O | 0.162646867739 | 0.243262556057 | 0.674643008881 |
| O18  | O | 0.839526198778 | 0.742151138767 | 0.372871151610 |
| O19  | O | 0.001695159366 | 0.424222694570 | 0.721163867512 |
| O20  | O | 0.003866399441 | 0.907396364498 | 0.321855692958 |
| O21  | O | 0.957026090485 | 0.360690643702 | 0.641230890887 |
| O22  | O | 0.047472482290 | 0.853545643858 | 0.406287543916 |
| O23  | O | 0.889836650655 | 0.211155290654 | 0.672516852164 |
| O24  | O | 0.116466878068 | 0.706277020127 | 0.374964066681 |
| O25  | O | 0.798457576436 | 0.332205754291 | 0.718758308607 |
| O26  | O | 0.207068425166 | 0.825224889994 | 0.327993023414 |
| O27  | O | 0.745241633751 | 0.421748819660 | 0.652845703621 |
| O28  | O | 0.258310258214 | 0.922520753008 | 0.390334881986 |
| O29  | O | 0.908437948093 | 0.553543369972 | 0.692152671478 |
| O30  | O | 0.084807092699 | 0.039259508705 | 0.353216853940 |
| O31  | O | 0.702939479273 | 0.258194505924 | 0.612595046091 |
| O32  | O | 0.301172047119 | 0.748133312889 | 0.436072823462 |
| O33  | O | 0.865740158160 | 0.387636525630 | 0.560912053570 |

|     |   |                |                |                |
|-----|---|----------------|----------------|----------------|
| 034 | O | 0.200902698794 | 0.904563381848 | 0.498388022754 |
| 035 | O | 0.618408038506 | 0.199051392840 | 0.675825590160 |
| 036 | O | 0.386854794431 | 0.696877126522 | 0.371434460619 |
| 037 | O | 0.526930494269 | 0.353798521793 | 0.679740181734 |
| 038 | O | 0.475062821892 | 0.854908371871 | 0.368979649258 |
| 039 | O | 0.650094225557 | 0.322048515223 | 0.779507795319 |
| 040 | O | 0.358431490808 | 0.817035039511 | 0.268989473109 |
| 041 | O | 0.490267591390 | 0.324244148244 | 0.596633111778 |
| 042 | O | 0.510769827360 | 0.828810896802 | 0.450709552479 |
| 043 | O | 0.450721565940 | 0.137210435051 | 0.600026811531 |
| 044 | O | 0.554015019674 | 0.640501266877 | 0.444971739667 |
| 045 | O | 0.343649303827 | 0.204973172165 | 0.676160785057 |
| 046 | O | 0.655934814490 | 0.714772730567 | 0.367411471787 |
| 047 | O | 0.243726832779 | 0.326269852705 | 0.638525408175 |
| 048 | O | 0.755018597492 | 0.830662173585 | 0.405702742080 |
| 049 | O | 0.175279382056 | 0.129038953615 | 0.596586684951 |
| 050 | O | 0.806565174953 | 0.620011253724 | 0.455111924847 |
| 051 | O | 0.262251209692 | 0.945419146908 | 0.660180452098 |
| 052 | O | 0.747887459989 | 0.446101948272 | 0.395766657813 |
| 053 | O | 0.401780034573 | 0.938679111499 | 0.664542565267 |
| 054 | O | 0.606072299122 | 0.434821700491 | 0.385131520722 |
| 055 | O | 0.388986513495 | 0.019571984487 | 0.566597711710 |
| 056 | O | 0.604979548316 | 0.527098218922 | 0.481058114802 |
| 057 | O | 0.497093727105 | 0.816621860292 | 0.659681301755 |
| 058 | O | 0.512356000214 | 0.312136593353 | 0.393583844445 |
| 059 | O | 0.629330442701 | 0.785946316525 | 0.699784580732 |
| 060 | O | 0.380951425266 | 0.289527382207 | 0.350445037656 |
| 061 | O | 0.541404300499 | 0.801047943924 | 0.836415589083 |
| 062 | O | 0.493164587855 | 0.291479360014 | 0.219476777852 |
| 063 | O | 0.518751960647 | 0.921236587390 | 0.840934163277 |
| 064 | O | 0.526226547230 | 0.407357383152 | 0.212090290161 |
| 065 | O | 0.667671854791 | 0.652783341933 | 0.642404817385 |
| 066 | O | 0.333388157959 | 0.154738773002 | 0.406129672797 |
| 067 | O | 0.663615855696 | 0.793968939701 | 0.577977964408 |
| 068 | O | 0.336890274799 | 0.296963801344 | 0.470388590257 |
| 069 | O | 0.759240878825 | 0.915565742602 | 0.628245257904 |
| 070 | O | 0.248219465515 | 0.424558953999 | 0.418473622134 |
| 071 | O | 0.870085096320 | 0.779969095301 | 0.631605419465 |
| 072 | O | 0.137937796904 | 0.297811737683 | 0.412470291141 |
| 073 | O | 0.876063486684 | 0.752107741169 | 0.543697903188 |
| 074 | O | 0.116592199699 | 0.260060679285 | 0.494454564030 |
| 075 | O | 0.730628842418 | 0.636954271004 | 0.561779682767 |
| 076 | O | 0.265296682569 | 0.139770081605 | 0.481021142579 |
| 077 | O | 0.884885893150 | 0.946662591488 | 0.525766346122 |
| 078 | O | 0.106507226568 | 0.439846007052 | 0.516257781990 |
| 079 | O | 0.795983846022 | 0.132219956617 | 0.434523896355 |
| 080 | O | 0.216126055702 | 0.640438246848 | 0.609494627996 |
| 081 | O | 0.997977210808 | 0.010387908720 | 0.616971485918 |
| 082 | O | 0.000792759354 | 0.508718821259 | 0.441694857972 |
| 083 | O | 0.857347615982 | 0.992344528382 | 0.650084188297 |
| 084 | O | 0.144732206900 | 0.490487607977 | 0.394219941617 |
| 085 | O | 0.038713056464 | 0.828366706652 | 0.691229587305 |
| 086 | O | 0.964001034404 | 0.326756965539 | 0.356637065796 |
| 087 | O | 0.907523057074 | 0.772959284393 | 0.705422136334 |
| 088 | O | 0.095095110405 | 0.270799620093 | 0.343038812447 |
| 089 | O | 0.834919271012 | 0.794623584420 | 0.815975447105 |
| 090 | O | 0.154749301832 | 0.282343521215 | 0.231900525240 |
| 091 | O | 0.815754749882 | 0.546843588087 | 0.844308982554 |
| 092 | O | 0.192437884225 | 0.028160278978 | 0.201846479067 |
| 093 | O | 0.738549121320 | 0.613184379359 | 0.945695057210 |
| 094 | O | 0.254196345079 | 0.120946115244 | 0.105257476335 |
| 095 | O | 0.690386323641 | 0.540583701531 | 0.027977537735 |
| 096 | O | 0.296579801980 | 0.054972739187 | 0.011341209993 |

|      |   |                |                |                |
|------|---|----------------|----------------|----------------|
| 097  | O | 0.764561551178 | 0.702187962767 | 0.017729107046 |
| 098  | O | 0.213323404723 | 0.183736653925 | 0.033415955255 |
| 099  | O | 0.871368019605 | 0.906927923747 | 0.058267042243 |
| 0100 | O | 0.119642969816 | 0.400484527419 | 0.984620036997 |
| 0101 | O | 0.034181963825 | 0.738805777159 | 0.029721149602 |
| 0102 | O | 0.949352983658 | 0.233723469138 | 0.011307701819 |
| 0103 | O | 0.971495182994 | 0.799943438905 | 0.126234614584 |
| 0104 | O | 0.029572982874 | 0.306777838792 | 0.917960069633 |
| 0105 | O | 0.141683050704 | 0.866551496857 | 0.008931391529 |
| 0106 | O | 0.847622790364 | 0.388642621808 | 0.040957631497 |
| 0107 | O | 0.211250950908 | 0.897589962825 | 0.934491002701 |
| 0108 | O | 0.781423716137 | 0.387673912490 | 0.114909090243 |
| 0109 | O | 0.369940827734 | 0.001333731975 | 0.911566122791 |
| 0110 | O | 0.646679731775 | 0.491949924549 | 0.153041122358 |
| 0111 | O | 0.274344038273 | 0.916604779320 | 0.811307641748 |
| 0112 | O | 0.726762798612 | 0.399587237223 | 0.237739621680 |
| 0113 | O | 0.319096303848 | 0.743491801568 | 0.875686807143 |
| 0114 | O | 0.699452146486 | 0.215897862574 | 0.169030953628 |
| 0115 | O | 0.367112393840 | 0.707493434926 | 0.829038238525 |
| 0116 | O | 0.645004955224 | 0.162070959979 | 0.209886697317 |
| 0117 | O | 0.095907906121 | 0.980589660098 | 0.888442415534 |
| 0118 | O | 0.895068208522 | 0.477560379029 | 0.155919932512 |
| 0119 | O | 0.189460650076 | 0.678111117886 | 0.735518721583 |
| 0120 | O | 0.811220799962 | 0.179018120604 | 0.312306864943 |
| 0121 | O | 0.123438763174 | 0.208484248503 | 0.919109126017 |
| 0122 | O | 0.880457545230 | 0.696393674998 | 0.127252457524 |
| 0123 | O | 0.993656788429 | 0.159883289645 | 0.858998289649 |
| 0124 | O | 0.018528260194 | 0.639835109880 | 0.183408660050 |
| 0125 | O | 0.216055891924 | 0.234175819506 | 0.811758164740 |
| 0126 | O | 0.802638388687 | 0.722009863316 | 0.236075468329 |
| 0127 | O | 0.981810868098 | 0.273655086041 | 0.838100383499 |
| 0128 | O | 0.033857626050 | 0.752866476728 | 0.204421802353 |
| 0129 | O | 0.020920447105 | 0.583856199636 | 0.504344572065 |
| 0130 | O | 0.000886665045 | 0.798685489580 | 0.551357681108 |
| 0131 | O | 0.008274022299 | 0.948612265699 | 0.536403840048 |
| 0132 | O | 0.053646674085 | 0.066554093595 | 0.495597986785 |
| 0133 | O | 0.023865969095 | 0.188771122812 | 0.456912072343 |
| 0134 | O | 0.993638139165 | 0.331632340939 | 0.494902808577 |
| 0135 | O | 0.460512347420 | 0.521796717912 | 0.161894859135 |
| 0136 | O | 0.555273655738 | 0.792133853442 | 0.206501035530 |
| 0137 | O | 0.561278594134 | 0.938546141602 | 0.189545120764 |
| 0138 | O | 0.496149018095 | 0.069851169486 | 0.192960368591 |
| 0139 | O | 0.497405600723 | 0.206825803460 | 0.159119625053 |
| 0140 | O | 0.513069433511 | 0.386513944777 | 0.145465813165 |
| 0141 | O | 0.737447233474 | 0.047316347749 | 0.925722074042 |
| 0142 | O | 0.246555673191 | 0.551948284276 | 0.112929733815 |
| 0143 | O | 0.270647643737 | 0.103797202282 | 0.827700625050 |
| 0144 | O | 0.724203696641 | 0.605044420089 | 0.225103008270 |
| 0145 | O | 0.356938994796 | 0.190408666595 | 0.860936206816 |
| 0146 | O | 0.606888951117 | 0.652405223939 | 0.212824431751 |
| 0147 | O | 0.270752580479 | 0.386052266607 | 0.742456393783 |
| 0148 | O | 0.734478160591 | 0.881837032836 | 0.300993038721 |
| 0149 | O | 0.216107449938 | 0.434600901946 | 0.684309109976 |
| 0150 | O | 0.788765279556 | 0.932781265869 | 0.359049756386 |
| 0151 | O | 0.224044540800 | 0.586737773087 | 0.671841370919 |
| 0152 | O | 0.778380803318 | 0.083033814373 | 0.371572233698 |
| 0153 | O | 0.306679943521 | 0.630277343857 | 0.719526742868 |
| 0154 | O | 0.693537929040 | 0.127621568275 | 0.318390030677 |
| 0155 | O | 0.334482936317 | 0.508411793919 | 0.760351680438 |
| 0156 | O | 0.674068507901 | 0.002416914649 | 0.276827801825 |
| 0157 | O | 0.688670799380 | 0.288551357021 | 0.842749913730 |
| 0158 | O | 0.331603991788 | 0.791038008244 | 0.204582468326 |
| 0159 | O | 0.868465969447 | 0.552315906644 | 0.757634229283 |

|      |   |                |                |                |
|------|---|----------------|----------------|----------------|
| 0160 | O | 0.135076082318 | 0.043366152115 | 0.290206213021 |
| 0161 | O | 0.746679865646 | 0.554727719959 | 0.748118209514 |
| 0162 | O | 0.258632509323 | 0.046154782356 | 0.298833820098 |
| 0163 | O | 0.718202572925 | 0.548224702835 | 0.682520308598 |
| 0164 | O | 0.271190032505 | 0.060311426082 | 0.365836732280 |
| 0165 | O | 0.982604794288 | 0.150035517718 | 0.583981621307 |
| 0166 | O | 0.024820291370 | 0.733367433663 | 0.486927099877 |
| 0167 | O | 0.545568150526 | 0.241198236829 | 0.772168355190 |
| 0168 | O | 0.499078830455 | 0.822072115572 | 0.266001221468 |
| 0169 | O | 0.473655729744 | 0.352287742642 | 0.742498040875 |
| 0170 | O | 0.568382819714 | 0.847869327225 | 0.323830307767 |
| 0171 | O | 0.458110294977 | 0.488957527091 | 0.763147780886 |
| 0172 | O | 0.560632822893 | 0.985147493361 | 0.299145790847 |
| 0173 | O | 0.328720800732 | 0.248680396048 | 0.745183830165 |
| 0174 | O | 0.673365302092 | 0.745849983795 | 0.297442845629 |
| 0175 | O | 0.090605123566 | 0.161993473248 | 0.547350131439 |
| 0176 | O | 0.898514464459 | 0.734480030959 | 0.474176423189 |
| 0177 | O | 0.121891851425 | 0.995501906620 | 0.625123499233 |
| 0178 | O | 0.882470647501 | 0.520528419227 | 0.418844713127 |
| 0179 | O | 0.234510439394 | 0.812837492930 | 0.689884149752 |
| 0180 | O | 0.767933544512 | 0.312515629163 | 0.361707246857 |
| 0181 | O | 0.276178547235 | 0.027055514940 | 0.527332576098 |
| 0182 | O | 0.716795571819 | 0.534979507987 | 0.511238946669 |
| 0183 | O | 0.390308668594 | 0.781896801205 | 0.765325524469 |
| 0184 | O | 0.622478721009 | 0.250325421778 | 0.293935671484 |
| 0185 | O | 0.284029380881 | 0.840413028312 | 0.748944183561 |
| 0186 | O | 0.719426659011 | 0.337024323204 | 0.301493842148 |
| 0187 | O | 0.471052904553 | 0.634771624701 | 0.746628462528 |
| 0188 | O | 0.544353022154 | 0.130589817894 | 0.314598720517 |
| 0189 | O | 0.483298077543 | 0.054644482712 | 0.814946896802 |
| 0190 | O | 0.519149606561 | 0.565400970228 | 0.234824876733 |
| 0191 | O | 0.483683202677 | 0.673580662966 | 0.821233057784 |
| 0192 | O | 0.539639952594 | 0.156952367536 | 0.243350273729 |
| 0193 | O | 0.603691972090 | 0.796963482900 | 0.897734355122 |
| 0194 | O | 0.398999223452 | 0.339359134335 | 0.149620092511 |
| 0195 | O | 0.130480575802 | 0.728884587029 | 0.677756908036 |
| 0196 | O | 0.872775101079 | 0.227900101114 | 0.369763415997 |
| 0197 | O | 0.958008527096 | 0.675844262376 | 0.661499095882 |
| 0198 | O | 0.045169185540 | 0.161257099043 | 0.386319416900 |
| 0199 | O | 0.931953559301 | 0.519343071542 | 0.816503333168 |
| 0200 | O | 0.078204291741 | 0.004472329702 | 0.232256087211 |
| 0201 | O | 0.731487664889 | 0.432723238242 | 0.851842677955 |
| 0202 | O | 0.291562395496 | 0.933727194950 | 0.186374805874 |
| 0203 | O | 0.901034745439 | 0.484580945857 | 0.995790421564 |
| 0204 | O | 0.099588884595 | 0.966155885982 | 0.054537194200 |
| 0205 | O | 0.027220566490 | 0.487802411350 | 0.016841845079 |
| 0206 | O | 0.984115044012 | 0.004306839222 | 0.028995603579 |
| 0207 | O | 0.945234548194 | 0.639690532958 | 0.062033605886 |
| 0208 | O | 0.019298940710 | 0.117975907180 | 0.987883483337 |
| 0209 | O | 0.979241553116 | 0.571240817588 | 0.124588494854 |
| 0210 | O | 0.024483947201 | 0.089631397287 | 0.917720346251 |
| 0211 | O | 0.067754304382 | 0.564061412577 | 0.075128539547 |
| 0212 | O | 0.901013007934 | 0.118125220382 | 0.927652208786 |
| 0213 | O | 0.331466850091 | 0.770492378013 | 0.028823554039 |
| 0214 | O | 0.620996620528 | 0.276772640643 | 0.043442576058 |
| 0215 | O | 0.256993014525 | 0.612783571151 | 0.878653881783 |
| 0216 | O | 0.737742078240 | 0.073674137368 | 0.154855810818 |
| 0217 | O | 0.321809633958 | 0.568307516871 | 0.822501046424 |
| 0218 | O | 0.667474161614 | 0.017877243501 | 0.207008911436 |
| 0219 | O | 0.996874769985 | 0.413247536850 | 0.856847863269 |
| 0220 | O | 0.018227994720 | 0.895855275848 | 0.192831247192 |
| 0221 | O | 0.110402799773 | 0.416437014489 | 0.888066849735 |
| 0222 | O | 0.903929552377 | 0.904119809711 | 0.163051575185 |

|      |   |                |                |                |
|------|---|----------------|----------------|----------------|
| 0223 | O | 0.087318664702 | 0.572869866433 | 0.900134361581 |
| 0224 | O | 0.871989735767 | 0.062646272240 | 0.159415517047 |
| 0225 | O | 0.605669016926 | 0.338991302136 | 0.887860675754 |
| 0226 | O | 0.430979377051 | 0.675028213265 | 0.066398321033 |
| 0227 | O | 0.361244198235 | 0.699625073487 | 0.941240774949 |
| 0228 | O | 0.356134891834 | 0.201355767248 | 0.004853843879 |
| 0229 | O | 0.435813585557 | 0.576033293870 | 0.930814115356 |
| 0230 | O | 0.551413570107 | 0.911651916726 | 0.022150560856 |
| 0231 | O | 0.326270482618 | 0.530726629534 | 0.917182267045 |
| 0232 | O | 0.560494146287 | 0.254224950370 | 0.106811091285 |
| 0233 | O | 0.475456709208 | 0.684581943677 | 0.891008220913 |
| 0234 | O | 0.547400201152 | 0.363127972379 | 0.006978497553 |
| 0235 | O | 0.452097784246 | 0.053681827731 | 0.095397461036 |
| 0236 | O | 0.433093551946 | 0.868734280447 | 0.033936209447 |
| 0237 | O | 0.396240672924 | 0.013020935335 | 0.158435843044 |
| 0238 | O | 0.544113052264 | 0.722688539959 | 0.945119603421 |
| 0239 | O | 0.625973925325 | 0.919023382360 | 0.076571695785 |
| 0240 | O | 0.616072634833 | 0.061264499701 | 0.877900720956 |
| 0241 | O | 0.547555763491 | 0.259456525091 | 0.942404415380 |
| 0242 | O | 0.386620482600 | 0.776017068186 | 0.112023638596 |
| 0243 | O | 0.450316587926 | 0.110147284950 | 0.937382084013 |
| 0244 | O | 0.509595055580 | 0.720211219805 | 0.019505729089 |
| 0245 | O | 0.575956863426 | 0.099751010178 | 0.088529533056 |
| 0246 | O | 0.362959157159 | 0.357426006851 | 0.933905622276 |
| 0247 | O | 0.439243874430 | 0.909207986989 | 0.114229559243 |
| 0248 | O | 0.558030336851 | 0.562543162954 | 0.076610553086 |
| 0249 | O | 0.472375379239 | 0.196811978617 | 0.881107398294 |
| 0250 | O | 0.385008544256 | 0.160712056780 | 0.067084643883 |
| 0251 | O | 0.639564872709 | 0.766088185065 | 0.131468441835 |
| 0252 | O | 0.681645625792 | 0.003217038468 | 0.982610268054 |
| 0253 | O | 0.564214812633 | 0.553324271661 | 0.906349184248 |
| 0254 | O | 0.489623208148 | 0.636861510985 | 0.122588043056 |
| 0255 | O | 0.313823932765 | 0.642472886876 | 0.996772486420 |
| 0256 | O | 0.667715895890 | 0.777811187386 | 0.063537808092 |
| 0257 | O | 0.352845888766 | 0.198592028328 | 0.929735163983 |
| 0258 | O | 0.694911632189 | 0.176229197920 | 0.980065196637 |
| 0259 | O | 0.611926968274 | 0.790200627575 | 0.002579250409 |
| 0260 | O | 0.556076651553 | 0.880455536982 | 0.128962684593 |
| 0261 | O | 0.489788793438 | 0.127818549206 | 0.002970317042 |
| 0262 | O | 0.606495823025 | 0.131233988346 | 0.936917335086 |
| 0263 | O | 0.518591641885 | 0.425570203095 | 0.067282649328 |
| 0264 | O | 0.432340515301 | 0.790410222631 | 0.977444975539 |
| 0265 | O | 0.558878228049 | 0.166118379297 | 0.835847382166 |
| 0266 | O | 0.290382352258 | 0.532985184218 | 0.042784490516 |
| 0267 | O | 0.442778320244 | 0.762432880748 | 0.176877878258 |
| 0268 | O | 0.412551888397 | 0.009619412817 | 0.019065616102 |
| 0269 | O | 0.557425097969 | 0.934081779594 | 0.902708214083 |
| 0270 | O | 0.329688988936 | 0.340036303264 | 0.864606627949 |
| 0271 | O | 0.457620240881 | 0.838410969039 | 0.916163349378 |
| 0272 | O | 0.595828368767 | 0.421214066857 | 0.949816394271 |
| 0273 | O | 0.482119495381 | 0.242657138675 | 0.054472912989 |
| 0274 | O | 0.607624367916 | 0.132582351347 | 0.023591965103 |
| 0275 | O | 0.754532445800 | 0.970317115280 | 0.043040397677 |
| 0276 | O | 0.389545326978 | 0.475536635568 | 0.862513351502 |
| 0277 | O | 0.299696183174 | 0.680446120687 | 0.085785032542 |
| 0278 | O | 0.395015998103 | 0.479243529887 | 0.070319982526 |
| 0279 | O | 0.689065511184 | 0.038512106383 | 0.095598376069 |
| 0280 | O | 0.357819335321 | 0.474744970571 | 0.132576752428 |
| 0281 | O | 0.482046644619 | 0.347123213575 | 0.878624253409 |
| 0282 | O | 0.306278679191 | 0.459671066008 | 0.977424370004 |
| 0283 | O | 0.450091709751 | 0.283030231786 | 0.977132604497 |
| 0284 | O | 0.470295831486 | 0.432655015850 | 0.930752501058 |
| 0285 | O | 0.601072692607 | 0.635137410077 | 0.147307312647 |

|      |   |                |                |                |
|------|---|----------------|----------------|----------------|
| O286 | O | 0.550306449618 | 0.580028820399 | 0.010501879163 |
| O287 | O | 0.423611398325 | 0.444619770291 | 0.994988426698 |
| O288 | O | 0.563872068541 | 0.006902477902 | 0.967407415948 |
| O289 | O | 0.423179586067 | 0.586516856727 | 0.009124262978 |
| O290 | O | 0.669953183180 | 0.633184086679 | 0.077892834078 |
| O291 | O | 0.622041087609 | 0.613312151445 | 0.960284495513 |
| O292 | O | 0.610985562322 | 0.472199884311 | 0.858314221571 |
| O293 | O | 0.392686975640 | 0.346990637090 | 0.043402003588 |
| O294 | O | 0.498331182384 | 0.516070714283 | 0.829887440251 |
| O295 | O | 0.391214359104 | 0.635174058701 | 0.204182262490 |
| O296 | O | 0.447820625944 | 0.686786231235 | 0.262524086238 |
| O297 | O | 0.436830421502 | 0.915033327174 | 0.221164003455 |
| O298 | O | 0.452787447051 | 0.018302960489 | 0.269686055889 |
| O299 | O | 0.377460900350 | 0.316581172938 | 0.216111875432 |
| O300 | O | 0.393305971434 | 0.470070794590 | 0.217540428620 |
| S1   | S | 0.941351103191 | 0.850691100809 | 0.914571646238 |
| S2   | S | 0.042493632907 | 0.316776860735 | 0.132962021345 |
| S3   | S | 0.903097185098 | 0.102800769454 | 0.764277483404 |
| S4   | S | 0.097964425046 | 0.591988483542 | 0.276566221533 |
| S5   | S | 0.579722694863 | 0.036458206068 | 0.584971187223 |
| S6   | S | 0.428763650376 | 0.538735078525 | 0.464456989352 |
| S7   | S | 0.552652196222 | 0.993982066447 | 0.631161291304 |
| S8   | S | 0.455436871585 | 0.496801600903 | 0.418147566243 |
| S9   | S | 0.901445118690 | 0.051396585294 | 0.717273896802 |
| S10  | S | 0.104799932424 | 0.546179432377 | 0.324713247361 |
| S11  | S | 0.960363124356 | 0.937757835074 | 0.947186047034 |
| S12  | S | 0.041388806464 | 0.401191067882 | 0.097608385108 |

#END
